# Supplementary material for: Chemometrics and genome mining reveal an unprecedented family of sugar acid–containing fungal nonribosomal cyclodepsipeptides
Source: PubMed Central journal article supplement — Proc Natl Acad Sci U S A. 2022 Aug 1;119(32):e2123379119. doi: 10.1073/pnas.2123379119 (PMC9371744; doi:10.1073/pnas.2123379119), 2022-08-01
Supplement: pnas.2123379119.sapp.pdf [file pnas.2123379119.sapp.pdf]

**SUPPLEMENTARY INFORMATION FOR**

**Chemometrics and Genome Mining Reveal an Unprecedented Family of**

**Sugar Acid-Containing Fungal Nonribosomal Cyclodepsipeptides**

Chen Wang<sup>a1</sup>, Dongliang Xiao<sup>a1</sup>, Baoqing Dun<sup>b1</sup>, Miaomiao Yin<sup>a</sup>, Adigo Setargie Tsega<sup>a</sup>, Linan Xie<sup>a</sup>,  
Wenhua Li<sup>a</sup>, Qun Yue<sup>a</sup>, Sibao Wang<sup>c</sup>, Han Gao<sup>c</sup>, Min Lin<sup>a</sup>, Liwen Zhang<sup>a\*</sup>, István Molnár<sup>d,e\*</sup>, and Yuquan  
Xu<sup>a\*</sup>

<sup>a</sup> Biotechnology Research Institute, Chinese Academy of Agricultural Sciences, 12 Zhongguancun South Street, Beijing 100081, P.R. China

<sup>b</sup> The National Key Facility for Crop Gene Resources and Genetic Improvement, Institute of Crop Sciences, Chinese Academy of Agricultural Sciences, 12 Zhongguancun South Street, Beijing 100081, P.R. China

<sup>c</sup> CAS Key Laboratory of Insect Developmental and Evolutionary Biology, CAS Center for Excellence in Molecular Plant Sciences, Shanghai Institute of Plant Physiology and Ecology, Chinese Academy of Sciences (CAS), 300 Feng Lin Road, Shanghai 200032, P.R. China.

<sup>d</sup> Southwest Center for Natural Products Research, University of Arizona, 250 E. Valencia Rd., Tucson, AZ 85706, USA

<sup>e</sup> VTT Technical Research Centre of Finland, P.O. Box 1000, FI-02044 VTT, Espoo, Finland

<sup>1</sup>These authors contribute equally to this work.

\* Corresponding authors: Y. Xu ([xuyuquan@caas.cn](mailto:xuyuquan@caas.cn)), Tel: +86 (010) 8210-9850; I. Molnár ([istvan.molnar@vtt.fi](mailto:istvan.molnar@vtt.fi)), Tel: +358 (20) 722-5362; L. Zhang ([zhangliwen@caas.cn](mailto:zhangliwen@caas.cn)), Tel: +86 (010) 8210-9850.

# Contents

|                                                                                                                                                 |    |
|-------------------------------------------------------------------------------------------------------------------------------------------------|----|
| 1. SI Materials and Methods .....                                                                                                               | 5  |
| 1.1. General.....                                                                                                                               | 5  |
| 1.2. MALDI-TOF MS data acquisition and hierarchical cluster analysis .....                                                                      | 5  |
| 1.3. UHPLC-HRESI-MS/MS data acquisition and molecular network generation .....                                                                  | 6  |
| 1.4. Fungal strains and culture conditions .....                                                                                                | 7  |
| 1.5. Isolation and characterization of xylomyrocins .....                                                                                       | 7  |
| 1.6. Advanced Marfey's analysis .....                                                                                                           | 16 |
| 1.7. X-ray crystallographic analysis .....                                                                                                      | 17 |
| 1.8. GC-EIMS analysis.....                                                                                                                      | 17 |
| 1.9. Genomic DNA preparation.....                                                                                                               | 17 |
| 1.10. Genome sequencing and annotation .....                                                                                                    | 18 |
| 1.11. Accession numbers .....                                                                                                                   | 18 |
| 1.12. Total RNA extraction and cDNA synthesis.....                                                                                              | 19 |
| 1.13. Reverse transcription - quantitative PCR (RT-qPCR) analysis.....                                                                          | 19 |
| 1.14. Knockout of the <i>pxxmc</i> biosynthetic genes .....                                                                                     | 20 |
| 1.15. Culturing, feeding, and extraction of <i>Paramyrothecium</i> sp. XJ0827 with <sup>13</sup> C-labeled monosaccharides for MS analysis..... | 20 |
| 1.16. Cloning and expression of PxXmcG-A <sub>1</sub> T <sub>1</sub> and PxXmcG-A <sub>1</sub> .....                                            | 21 |
| 1.17. Antimicrobial activity evaluation .....                                                                                                   | 22 |
| 2. SI Tables.....                                                                                                                               | 24 |
| Table S1. Taxonomic information on the 182 fungal isolates identified by MALDI-TOF MS to produce peptide-like SMs .....                         | 24 |
| Table S2. <sup>1</sup> H NMR and <sup>13</sup> C NMR data.....                                                                                  | 25 |
| Table S3. Genome assembly statistics for <i>Paramyrothecium</i> sp. XJ0827 .....                                                                | 35 |
| Table S4. Summary of BGC types in <i>Paramyrothecium</i> sp. XJ0827.....                                                                        | 36 |
| Table S5. Predicted NRPSs encoded in the <i>Paramyrothecium</i> sp. XJ0827 genome.....                                                          | 37 |

|                                                                                                                                                                                     |    |
|-------------------------------------------------------------------------------------------------------------------------------------------------------------------------------------|----|
| Table S6. Substrate specificity signatures of the A domains of PxXmcG of <i>Paramyrothecium</i> sp. XJ0827 .....                                                                    | 39 |
| Table S7. Homologues of PxXmcG-A <sub>1</sub> in characterized cyclodepsipeptide synthetases .....                                                                                  | 40 |
| Table S8. Annotation of the <i>pxxmc</i> locus of <i>Paramyrothecium</i> sp. XJ0827 .....                                                                                           | 41 |
| Table S9. Putative xylose metabolic enzymes in <i>Paramyrothecium</i> sp. XJ0827 and <i>P. roridum</i> NRRL 2183. ....                                                              | 42 |
| Table S10. Putative xylan degradation enzymes in <i>Paramyrothecium</i> sp. XJ0827 .....                                                                                            | 43 |
| Table S11. Fungal BGCs in GenBank and MycoCosm encoding PxXmcG and PxXmcE homologues... ..                                                                                          | 44 |
| Table S12. Potential xylomyrocin-producing fungal strains screened in this study .....                                                                                              | 45 |
| Table S13. MALDI-TOF MS data for 10 groups of peptides produced by seven representative <i>Paramyrothecium</i> and <i>Colletotrichum</i> spp. ....                                  | 46 |
| Table S14. Substrate specificity signatures of the A domains of PrXmcG of <i>Paramyrothecium roridum</i> NRRL 2183.....                                                             | 47 |
| Table S15. Annotation of the <i>prxmc</i> locus of <i>Paramyrothecium roridum</i> NRRL 2183. ....                                                                                   | 48 |
| Table S16. Minimum inhibitory concentrations (MICs) of xylomyrocin A–C ( <b>1–3</b> ) .....                                                                                         | 50 |
| Table S17. PCR primers used in this study .....                                                                                                                                     | 51 |
| Table S18. Crystal data and structure refinement of compound <b>3</b> .....                                                                                                         | 54 |
| 3. SI Figures .....                                                                                                                                                                 | 55 |
| Figure S1. HRESIMS/MS analysis.....                                                                                                                                                 | 55 |
| Figure S2. Chemical structures and key <sup>1</sup> H– <sup>1</sup> H COSY/TOCSY (bold lines), HMBC (plain arrows) and NOE (dashed arrows) correlations of isolated compounds. .... | 67 |
| Figure S3. Stability of the ester linkage in xylomyrocins.....                                                                                                                      | 69 |
| Figure S4. RT-qPCR analysis of <i>pxxyd1</i> , <i>pxxyd2</i> , <i>pxuxs1</i> , <i>pxxyrA</i> , and genes in the <i>pxxmc</i> locus.....                                             | 70 |
| Figure S5. Targeted disruption of <i>pxxmc</i> genes. ....                                                                                                                          | 71 |
| Figure S6. Mass spectra of isotopically labeled xylomyrocin A.....                                                                                                                  | 72 |
| Figure S7. Tandem mass analysis of linearized <b>1</b> ( <b>17</b> ) with isotopical label.....                                                                                     | 73 |
| Figure S8. HPLC analysis of the hydrolysis of D-xylono-γ-lactone ( <b>14</b> ).....                                                                                                 | 75 |

|                                                                                                                                                                                                                                              |     |
|----------------------------------------------------------------------------------------------------------------------------------------------------------------------------------------------------------------------------------------------|-----|
| Figure S9. <i>pxxmc</i> -like BGCs in fungal genomes.....                                                                                                                                                                                    | 76  |
| Figure S10. Substrate specificity signatures of the A <sub>1</sub> domains of PxXmcG homologues found in fungal genomes.....                                                                                                                 | 77  |
| Figure S11. Sequence alignment of isolated xylomyrocins.....                                                                                                                                                                                 | 78  |
| Figure S12. Bioinformatic analysis of the <i>prxmc</i> locus in <i>Paramyrothecium roridum</i> NRRL 2183.....                                                                                                                                | 79  |
| Figure S13. Absence of soluble, dissected recombinant PxXmcG-A <sub>1</sub> and A <sub>1</sub> -T <sub>1</sub> in <i>E. coli</i> lysates.....                                                                                                | 80  |
| Figure S14. Phylogenetic analysis of A and M domains from PxXmcG and PrXmcG. ....                                                                                                                                                            | 81  |
| Figure S15. Advanced Marfey's analysis .....                                                                                                                                                                                                 | 82  |
| Figure S16. Comparison of the GC-EIMS spectra of the TMS derivative of the xylonic acid standard and the TMS derivatives of the tetrahydroxypentanoic acid (THP) residues of compounds <b>1</b> , <b>4</b> , <b>6</b> , and <b>11</b> . .... | 86  |
| Figure S17. HRESIMS spectra. ....                                                                                                                                                                                                            | 87  |
| Figure S18. NMR spectra.....                                                                                                                                                                                                                 | 94  |
| 4. SI References .....                                                                                                                                                                                                                       | 173 |

## 1. SI Materials and Methods

### 1.1. General

All commercial chemical and biological reagents were used as received. Oligonucleotides for polymerase chain reaction (PCR) and quantitative PCR (qPCR) were purchased from Sangon Biotech Co., Ltd. (Shanghai, China). Matrix-Assisted Laser Desorption/Ionization-Time of Flight Mass Spectrometry (MALDI-TOF MS) spectra were recorded on an Autoflex Speed mass spectrometer (Bruker, Billerica, MA, United States). Liquid Chromatography-High Resolution Electrospray Ionization Mass Spectrometry (LC-HRESIMS) spectra were recorded on an Agilent 1290 II Ultra High Performance Liquid Chromatography (UHPLC) coupled with an Agilent 6530 QTOF instrument (Agilent Technologies Inc., Santa Clara, CA, USA) operated in positive ion mode using capillary and cone voltages of 3.6 kV and 40–150 V, respectively. The collision energy was optimized from 15 to 50 eV. For accurate mass measurements the instrument was calibrated each time using a standard calibration mix in the  $m/z$  range of 150-1900. Routine LC-ESIMS analysis was performed on an Agilent 1290 II UHPLC equipped with an Agilent G6125B single quadrupole mass spectrometer (Agilent Technologies Inc., Santa Clara, CA, USA). Analytical HPLC was performed on a Waters Alliance e2695 system coupled with a Waters 2414 refractive index detector. Optical rotations were measured on an Anton Paar MCP-200 polarimeter (Anton Paar GmbH, Graz, Austria) at 25 °C. UV spectra were recorded on a Shimadzu UV-2450 photometer (Shimadzu Corporation, Kyoto, Japan).  $^1\text{H}$ ,  $^{13}\text{C}$  and 2D NMR experiments were carried out on an Agilent DD2 600 MHz NMR spectrometer (Agilent Technologies Inc., Santa Clara, CA, USA). Chemical shift values ( $\delta$ ) are given in parts per million (ppm) and the coupling constants ( $J$  values) are in Hz. Chemical shifts were referenced to the residual solvent peaks of methanol- $d_4$ , methanol- $d_3$  or DMSO- $d_6$ . For detection of D-xylose, D-xylono- $\gamma$ -lactone, D-xylonic acid, and D-xylono- $\gamma$ -lactone hydrolysate, samples were analyzed by LC-ESIMS or HPLC equipped with a Poroshell 120 HILIC-Z column (Agilent Technologies Inc., Santa Clara, CA, USA), eluting with isocratic 75 % aqueous acetonitrile with 0.1 % formic acid for 10 min at a flow rate of 0.8 mL/min. For column chromatography, macroporous D101 resin (Macklin Biochemical Co. Ltd., Shanghai, China) and Fuji ODS (40–75  $\mu\text{m}$ , Fuji Silysia Chemical Ltd., Osaka, Japan) were used. Semi-preparative HPLC experiments were performed on an Agilent Eclipse XDB-C18 reversed-phase column (5  $\mu\text{m}$ , 9.4 mm  $\times$  250 mm) using an Agilent 1260 II HPLC system (Agilent Technologies Inc., Santa Clara, CA, USA). Routine DNA sequencing was performed by Sangon Biotech Co., Ltd. (Shanghai, China).

### 1.2. MALDI-TOF MS data acquisition and hierarchical cluster analysis

MALDI-TOF MS matrix solution was prepared by dissolving *trans*-2-[3-(4-*tert*-butylphenyl)-2-methyl-

2-propenylidene]malononitrile (Sigma-Aldrich, Saint Louis, MO, United States) at a final concentration of 15 mg/mL in 90 % aqueous methanol solution with 0.1 % formic acid. Small amounts of the fungal mycelia, obtained from 10-14 days old cultures grown on potato dextrose agar (PDA) media, were spotted directly on the stainless steel 384-well target plate and immediately overlaid with 2-5  $\mu$ L matrix solution. The MALDI-TOF MS spectra were recorded in reflector/positive ion mode, and each sample was ablated 1,000 times within 1 second with a laser energy output of 70 %. A mass-to-charge ( $m/z$ ) window of 500–2,500 was applied to monitor the production of peptide-like secondary metabolites. All mass data were analyzed in the FlexAnalysis software (Bruker, Billerica, MA, United States). The mass peak list of peptide-producing fungal isolates was exported, and all peaks were aligned according to their  $m/z$  values using the Mass Profiler Professional software (Agilent, Santa Clara, CA, United States). Background noise and mass peaks corresponding to non-specific metabolites (ubiquitously present in over 50 % of fungal isolates) were removed. The resulting dataset was subjected to hierarchical clustering and heatmap plotting using imageGP ([http://www.ehbio.com/Cloud\\_Platform/front/#/](http://www.ehbio.com/Cloud_Platform/front/#/)).

### **1.3. UHPLC-HRESI-MS/MS data acquisition and molecular network generation**

Representative peptide-producing fungal strains were cultivated on PDA medium for 10–14 days, the mycelium was scraped off, and extracted with 90 % aqueous methanol. The resulting extract was concentrated and subjected to full scan UHPLC-HRESI-MS/MS analysis. The obtained tandem LC-MS data were used to generate the initial peptide molecular network using the Global Natural Products Social Molecular Networking (GNPS) server<sup>1</sup> following the well-established protocol<sup>2</sup>. Briefly, the data was filtered by removing all MS/MS fragment ions within  $\pm$  17 Da of the precursor  $m/z$ . MS/MS spectra were window filtered by choosing only the top 6 fragment ions in the  $\pm$  50Da window throughout the spectrum. The precursor ion mass tolerance was set to 0.03 Da and a MS/MS fragment ion tolerance of 0.03 Da. A network was then created where edges were filtered to have a cosine score above 0.7 and more than 6 matched peaks. Further, edges between two nodes were kept in the network if and only if each of the nodes appeared in each other's respective top 10 most similar nodes. Finally, the maximum size of a molecular family was set to 100, and the lowest scoring edges were removed from molecular families until the molecular family size was below this threshold. The spectra in the network were then searched against GNPS' spectral libraries. The library spectra were filtered in the same manner as the input data. All matches kept between network spectra and library spectra were required to have a score above 0.7 and at least 6 matched peaks. This initial network was visualized and analyzed in Cytoscape<sup>3</sup>. All precursor ions corresponding to the peptides identified in the earlier MALDI-TOF MS experiments were manually labeled, and the precursor ions that did not show a relationship with these labeled ions (ions corresponding to

metabolites unrelated to the peptides of interest) were removed to reduce complexity and generate the final peptide-specific network.

#### 1.4. Fungal strains and culture conditions

*Paramyrothecium* sp. XJ0827 and *Colletotrichum* sp. XJ1040 were isolated from soil samples collected from the northern region of Xinjiang province, China. *Paramyrothecium roridum* NRRL 2183 was purchased from the Agriculture Research Service Culture Collection (Peoria, IL, United States). Other fungal strains listed in Table S1 were acquired from the Agriculture Culture Collection of China (ACCC; Beijing, China) or MoonBiotech (MN; Guangzhou, Guangdong, China). Fungal strains were grown on PDA (potato starch 4 g/L, dextrose 20 g/L, agar 15 g/L) medium at 28 °C for 5 days. The colony surface was gently washed with 5 mL sterile water containing 0.1 % Triton X-100, the resulting spore suspension was filtered through a 40 µm cell strainer (Biologix Group Ltd., Jinan, China), and the filtrate was diluted with sterile water to a spore concentration of  $1 \times 10^6$ /mL. To screen for xylomyrocin congeners from various *Paramyrothecium* and *Colletotrichum* spp., 100 µL of the spore stock was used for the inoculation of each petri dish (90 mm in diameter) containing 20 mL of agar medium. Media included PDA; MMK2 (mannitol 40 g/L, yeast extract 5 g/L, Murashige and Skoog basal salt mixture powder 4.3 g/L, agar 15 g/L, pH 6.8); YM (malt extract 10 g/L, yeast extract 2 g/L, agar 15 g/L); YES (yeast extract 20 g/L, MgSO<sub>4</sub>·7H<sub>2</sub>O 0.5 g/L, sucrose 150 g/L, trace element solution 1 mL/L, agar 15 g/L; where the trace element solution contained ZnSO<sub>4</sub>·7H<sub>2</sub>O 0.1 g/L, CuSO<sub>4</sub>·5H<sub>2</sub>O 0.05 g/L); LSF1 (glycerol 75 g/L, glucose 10 g/L, yeast autolysate 5 g/L, soybean meal 5 g/L, tomato paste 5 g/L, NaNO<sub>3</sub> 2 g/L, (NH<sub>4</sub>)<sub>2</sub>SO<sub>4</sub> 2 g/L, agar 15 g/L); MV8 (maltose 75 g/L, V8 juice 200 mL/L, soy flour 1 g/L, L-proline 3 g/L, MES 16 g/L, agar 15 g/L, pH 6.5); or super malt (malt extract 50 g/L, yeast extract 10 g/L, FeSO<sub>4</sub>·7H<sub>2</sub>O 20 mg/L, ZnSO<sub>4</sub>·7H<sub>2</sub>O 7 mg/L, agar 15 g/L) media, respectively. The cultures were incubated at 28 °C for 10–14 days, followed by MALDI-TOF MS to monitor the production of peptides as described in section 1.2 above. For scale-up, 10–16 L of the appropriate culture media (500–800 petri dishes) were inoculated with the spore solution of the peptide-producing fungus, and cultivated under the same conditions used for the small-scale fermentations.

#### 1.5. Isolation and characterization of xylomyrocins

##### 1.5.1. Compounds 1–3

*Paramyrothecium* sp. XJ0827 was grown on PDA medium (a total of 12 L) for 14 days, the medium with the fungal culture was cut into small pieces (1 cm × 1 cm), and extracted with 90 % aqueous ethanol for three times. The extract was concentrated under vacuum to afford a crude extract of 4.7 g. This crude extract was subjected to macroporous D101 resin and ODS chromatography, and the fraction containing

xylomyrocins A–C (750 mg) was detected by MALDI-TOF MS and LC-ESIMS. This fraction was further purified by semi-preparative HPLC eluting with 65 % aqueous acetonitrile containing 0.1 % formic acid at a flow rate of 2.5 mL/min to afford compounds **1** (51 mg), **2** (13 mg), and **3** (7 mg).

Xylomyrocin A (**1**): white amorphous powder;  $[\alpha]_D^{25}$   $-130.5$  (c 0.21, CH<sub>3</sub>OH); UV (CH<sub>3</sub>OH)  $\lambda_{\max}$  (log  $\epsilon$ ) 205 (4.53) nm; <sup>1</sup>H and <sup>13</sup>C NMR data see Table S2.1; HRESIMS  $m/z$  1120.6295 [M + H]<sup>+</sup> (calcd for C<sub>54</sub>H<sub>90</sub>N<sub>9</sub>O<sub>16</sub>, 1120.6500).

Xylomyrocin B (**2**): white amorphous powder;  $[\alpha]_D^{25}$   $-196.2$  (c 0.29, CH<sub>3</sub>OH); UV (CH<sub>3</sub>OH)  $\lambda_{\max}$  (log  $\epsilon$ ) 205 (4.41) nm; <sup>1</sup>H and <sup>13</sup>C NMR data see Table S2.1; HRESIMS  $m/z$  1120.6294 [M + H]<sup>+</sup> (calcd for C<sub>54</sub>H<sub>90</sub>N<sub>9</sub>O<sub>16</sub>, 1120.6500).

Xylomyrocin C (**3**): white amorphous powder;  $[\alpha]_D^{25}$   $-176.6$  (c 0.59, CH<sub>3</sub>OH); UV (CH<sub>3</sub>OH)  $\lambda_{\max}$  (log  $\epsilon$ ) 205 (4.54) nm; <sup>1</sup>H and <sup>13</sup>C NMR data see Table S2.1; HRESIMS  $m/z$  1120.6288 [M + H]<sup>+</sup> (calcd for C<sub>54</sub>H<sub>90</sub>N<sub>9</sub>O<sub>16</sub>, 1120.6500).

The [M + H]<sup>+</sup> ion found at  $m/z$  1120.6288 in the positive mode HRESIMS (Fig. S17.3), together with the presence of 54 resonance signals in the <sup>13</sup>C NMR spectrum (Table S2.1) gave a molecular formula of C<sub>54</sub>H<sub>89</sub>N<sub>9</sub>O<sub>16</sub> for **3**, requiring 15 degrees of unsaturation. Multiple carbonyl carbon signals at  $\delta_C$  171.2–176.1, and heteroatom-bound carbon signals at  $\delta_C$  54.8–74.8 in the <sup>13</sup>C NMR spectrum (Table S2.1) strongly indicated that **3** is a peptide natural product. Three significantly deshielded methyl singlets ( $\delta_H$  3.39, 3.29, and 2.84) found in the <sup>1</sup>H NMR spectrum suggested the presence of three oxygenated or nitrogenated CH<sub>3</sub> functionalities in **3**, while a series of methyl doublets and triplets found at  $\delta_H$  0.91–1.13 (Table S2.1) are characteristic of aliphatic amino acids, such as leucine (Leu), isoleucine (Ile), and valine (Val). A comprehensive analysis of the <sup>1</sup>H, <sup>13</sup>C, COSY, TOCSY, HSQC, and HMBC spectra (Fig. S2) revealed that **3** consisted of a noncanonical 2,3,4,5-tetrahydroxypentanoic acid moiety (THP) and nine amino acid residues, including glycine (Gly), Ile, Leu (2×), *N*-methylated phenylalanine (MePhe), *N*-methylated threonine (MeThr), *N*-methylated valine (MeVal), serine (Ser), and Val. Next, a detailed examination of HMBC correlations from the  $\alpha$ -proton(s)/*N*-methyl protons to the amide carbonyl carbons (Fig. S2) established a primary sequence of THP<sub>1</sub>–Leu<sub>2</sub>–MeThr<sub>3</sub>–Val<sub>4</sub>–MePhe<sub>5</sub>–Gly<sub>6</sub>–Ile<sub>7</sub>–Ser<sub>8</sub>–Leu<sub>9</sub>–MeVal<sub>10</sub> for **3**. All functionalities presented in this linear sequence accounted for 14 of the 15 degrees of unsaturation, indicating that **3** adopts a macrocyclic structure, probably via an ester linkage between one of the OH groups of THP<sub>1</sub>, MeThr<sub>3</sub>, or Ser<sub>8</sub>, and the free carbonyl group of MeVal<sub>10</sub>. Indeed, HMBC correlation between the  $\delta$ -protons of THP<sub>1</sub> ( $\delta_H$  4.41, 4.09) and the carbonyl carbon ( $\delta_C$  171.87) of MeVal<sub>10</sub> confirmed the connecting site between THP<sub>1</sub> and MeVal<sub>10</sub>, and fully established the planar structure of **3** (Fig. S2).

*De novo* sequencing of **3** by analyzing the tandem mass spectrum was inconclusive due to the



complex fragmentation pattern resulting from random ring opening of the cyclodepsipeptide backbone during collision-induced dissociation (CID). To avoid such complexity, **3** was first linearized by methanolysis upon treatment with CH<sub>3</sub>ONa/CH<sub>3</sub>OH, and the resulting methoxy-substituted derivative (**19**) was subjected to tandem mass analysis (Fig. S1.1). Fragmentation of the [M + H]<sup>+</sup> ion of **19** at *m/z* 1152.6684 generated a series of b- and y-type fragment ions. The appearance of b-type ions at *m/z* 1007.5607, 894.4920, 807.4440, 694.3611, 637.3404, 476.2543, 377.1910, and 262.1277 corresponded to the consecutive loss of methoxy-substituted MeVal<sub>10</sub>, Leu<sub>9</sub>, Ser<sub>8</sub>, Ile<sub>7</sub>, Gly<sub>6</sub>, MePhe<sub>5</sub>, Val<sub>4</sub>, and MeThr<sub>3</sub> from the C-termini of the precursor ion (Fig. S1.1). On the other hand, the presence of y-type ions at *m/z* 1004.6305, 891.5493, 776.4872, and 677.4191 was consistent with the successive loss of THP<sub>1</sub>, Leu<sub>2</sub>, MeThr<sub>3</sub>, and Val<sub>4</sub> from the N-termini of the precursor ion (Fig. S1.1). In summary, the peptide sequence deduced from these MS/MS fragmentation data was in complete agreement with that elucidated by NMR spectrometry, thus further supporting the established planar structure of **3**.

**1** and **2** were found to have the same molecular formula (C<sub>54</sub>H<sub>89</sub>N<sub>9</sub>O<sub>16</sub>) as **3** upon analyzing their HRESIMS (Fig. S17.1 and S17.2) and <sup>13</sup>C NMR spectra (Table S2.1). Interpretation of the one- and two-dimensional (1D and 2D) NMR spectra (Fig. S2) revealed that **1** and **2** share the identical linear sequence of THP<sub>1</sub>–Leu<sub>2</sub>–MeThr<sub>3</sub>–Val<sub>4</sub>–MePhe<sub>5</sub>–Gly<sub>6</sub>–Ile<sub>7</sub>–Ser<sub>8</sub>–Leu<sub>9</sub>–MeVal<sub>10</sub> with **3**, and this was further supported by the tandem mass data (Fig. S1.2 and S1.3) of the linearized **1** and **2** (**17** and **18**). However, moderate to significant chemical shift variations were observed for the THP<sub>1</sub> protons and carbons (Table S2.1), indicating that **1** and **2** may have different connecting sites between THP<sub>1</sub> and MeVal<sub>10</sub> as compared to **3**. Clear HMBC correlation was observed for the α-proton of THP<sub>1</sub> (δ<sub>H</sub> 5.08) and the carbonyl carbon (δ<sub>C</sub> 170.65) of MeVal<sub>10</sub> for **1** (Fig. S2), confirming the macrocyclic ring was formed via an ester linkage connecting the α-OH of THP<sub>1</sub> and the C=O of MeVal<sub>10</sub>. Noteworthy, formation of ester bond causes considerable deshielding of the OH-donating carbon (Δδ<sub>C</sub> +4.5 ppm for the α-C of THP<sub>1</sub> when comparing **1** to **3**; Δδ<sub>C</sub> +2.4 ppm for the δ-C of THP<sub>1</sub> when comparing **3** to **1**) and shielding of the immediately adjacent carbon(s) (Δδ<sub>C</sub> -1.4 ppm for the β-C of THP<sub>1</sub> when comparing **1** to **3**; Δδ<sub>C</sub> -2.9 ppm for the γ-C of THP<sub>1</sub> when comparing **3** to **1**). A general downfield shift is also observed for both the proton(s) on the OH-donating carbon and those on the vicinal carbon (Δδ<sub>H</sub> +0.93 and +0.13 ppm for the α-H and β-H of THP<sub>1</sub>, respectively, when comparing **1** to **3**; Δδ<sub>H</sub> +0.86, +0.60, and +0.37 ppm for the δ-H<sub>a</sub>, δ-H<sub>b</sub> and γ-H of THP<sub>1</sub>, respectively, when comparing **3** to **1**). Such “acylation effect” has long been noted for acyl substituted monosaccharides, and was used to identify the acylation site on the sugar.<sup>4-5</sup> In contrast to **1** and **3**, significant downfield shift was observed for the γ-C of THP<sub>1</sub> in **2** (δ<sub>C</sub> 78.02), while the resonance of β-C (δ<sub>C</sub> 68.70) and δ-C (δ<sub>C</sub> 60.53) of THP<sub>1</sub> largely shifted to upfield. Moreover, the proton on the γ-carbon of THP<sub>1</sub>

in **2** ( $\delta_{\text{H}}$  4.84) was significantly deshielded as well (Table S2.1). Based on this, an ester linkage between the  $\gamma$ -OH of THP<sub>1</sub> and the carbonyl carbon of MeVal<sub>10</sub> was expected to establish the macrolactone ring of **2** according to the “acylation rule”.

Subsequently, the advanced Marfey's method<sup>6</sup> was applied to assign the absolute configuration of each amino acid residue after acidic hydrolysis of **1**. All of the nine amino acids were determined to have L-configuration after comparative LC-ESIMS analysis of the 1-fluoro-2,4-dinitrophenyl-5-L-leucinamide (L-FDLA) and D/L-FDLA derivatives of the acidic hydrolysate (Fig. S15.1). A single-crystal X-ray diffraction analysis of a sample recrystallized from the acetonitrile solution of **3** (Table S18 and main text Fig. 2B) unequivocally confirmed that all of the nine amino acids were L-configured, and the remaining THP unit adopts a (2*R*,3*S*,4*R*)-configuration which is consistent with that of D-xylonic acid (Xyl). Since all three xylomyrocins were biosynthesized by the same NRPS machinery, the absolute configuration of the THP moiety in **1** and **2** was postulated in analogy with that of **3**.

### 1.5.2. Compounds **4**, **M1**, and **M2**

*Paramyrothecium roridum* NRRL 2183 was grown on MMK2 medium (a total of 24 L) for 14 days, and the resulting culture was processed as described for *Paramyrothecium* sp. XJ0827. The fraction containing putative xylomyrocins (970 mg out of 8.7 g crude extract) was purified by semi-preparative HPLC eluting with 75 % aqueous methanol containing 0.1 % formic acid at a flow rate of 2.5 mL/min to yield compound **4** (11 mg), and two isomeric mixtures **M1** (59 mg), and **M2** (190 mg). Attempts to separate the isomers present in **M1** and **M2** on various conventional and chiral HPLC columns were unsuccessful.

Xylomyrocins D (**4**): white amorphous powder;  $[\alpha]_{\text{D}}^{25}$  -198.6 (*c* 0.29, CH<sub>3</sub>OH); UV (CH<sub>3</sub>OH)  $\lambda_{\text{max}}$  (log  $\epsilon$ ) 205 (4.40) nm; <sup>1</sup>H and <sup>13</sup>C NMR data see Table S2.2; HRESIMS *m/z* 1084.6676 [M + H]<sup>+</sup> (calcd for C<sub>52</sub>H<sub>94</sub>N<sub>9</sub>O<sub>15</sub>, 1084.6863).

Xylomyrocins mixture 1 (**M1**): white amorphous powder; UV (CH<sub>3</sub>OH)  $\lambda_{\text{max}}$  (log  $\epsilon$ ) 205 (4.24) nm; HRESIMS *m/z* 1084.6674 [M + H]<sup>+</sup> (calcd for C<sub>52</sub>H<sub>94</sub>N<sub>9</sub>O<sub>15</sub>, 1084.6863).

Xylomyrocins mixture 2 (**M2**): white amorphous powder; UV (CH<sub>3</sub>OH)  $\lambda_{\text{max}}$  (log  $\epsilon$ ) 205 (4.35) nm; HRESIMS *m/z* 1098.6817 [M + H]<sup>+</sup> (calcd for C<sub>53</sub>H<sub>96</sub>N<sub>9</sub>O<sub>15</sub>, 1098.7020).

The molecular formula of **4** was determined as C<sub>52</sub>H<sub>93</sub>N<sub>9</sub>O<sub>15</sub>, requiring 11 degrees of unsaturation, by analyzing the HRESIMS (Fig. S17.4) and <sup>13</sup>C NMR spectroscopic data (Table S2.2). A comprehensive analysis of the 1D and 2D NMR spectra (Fig. S2) suggested that the structure of **4** consists of one glutamine (Gln), one Ile, two Leu, one *N*-methyleucine (MeLeu), one MeThr, two MeVal, and one THP moiety. Further interpretation of the HMBC and ROESY correlations (Fig. S2) established the connectivity between each constitutional unit, and gave a peptide sequence of THP<sub>1</sub>-Leu<sub>2</sub>-MeThr<sub>3</sub>-Ile<sub>4</sub>-MeVal<sub>5</sub>-Leu<sub>6</sub>-Gln<sub>7</sub>-MeLeu<sub>8</sub>-

MeVal<sub>9</sub> for **4**. This sequence was in complete agreement with that deduced from the HRESIMS/MS data of **20**, the methoxy-substituted derivative of **4** (Fig. S1.4). This linear sequence accounted for only 10 of the 11 degrees of unsaturation, suggesting a cyclic structure for **4**. HMBC interaction from the  $\beta$ -proton of THP<sub>1</sub> ( $\delta_{\text{H}}$  5.14) to the carbonyl carbon of the terminal MeVal<sub>9</sub> ( $\delta_{\text{C}}$  170.62) was indicative for an ester linkage between the  $\beta$ -OH of THP<sub>1</sub> and the carbonyl carbon of MeVal<sub>9</sub> (Fig. S2). Thus, the planar structure of **4** was determined as cyclo(THP<sub>1</sub>-Leu<sub>2</sub>-MeThr<sub>3</sub>-Ile<sub>4</sub>-MeVal<sub>5</sub>-Leu<sub>6</sub>-Gln<sub>7</sub>-MeLeu<sub>8</sub>-MeVal<sub>9</sub>).

The positive mode HRESIMS spectrum of **M1** displayed an  $[M + H]^+$  ion at  $m/z$  1084.6674 (Fig. S17.5), indicating the same molecular formula of C<sub>52</sub>H<sub>93</sub>N<sub>9</sub>O<sub>15</sub> as observed for **4**. **M1** was eluted as a broad single chromatographic peak during HPLC analysis, and its <sup>1</sup>H NMR spectrum was quite complicated, showing a similar overall resonating pattern yet far more resonance signals as compared to that of **4**. Such complexity of the <sup>1</sup>H NMR spectrum indicated that **M1** is a mixture of multiple xylomyrocin congeners, and thus rendered NMR-based structure characterization arduous and error-prone. In this case, tandem mass spectrometry was used to elucidate the peptide sequence of **M1** after methanolysis-mediated linearization. The methanolysis of **M1** gave two major products (**21** and **22**) both showing  $[M + H]^+$  ions at  $m/z$  1116.7 during LC-HRESIMS analysis. The fragmentation profile of protonated **21** (Fig. S1.5) was identical to that of protonated **20** (Fig. S1.4), indicating they share the same C-terminal modified peptide sequence of THP<sub>1</sub>-Leu<sub>2</sub>-MeThr<sub>3</sub>-Ile<sub>4</sub>-MeVal<sub>5</sub>-Leu<sub>6</sub>-Gln<sub>7</sub>-MeLeu<sub>8</sub>-MeVal<sub>9</sub>-OMe. Meanwhile, amongst the b/b\*-type ions generated from the dissociation of protonated **22**, b<sub>2</sub>/b<sub>2</sub>\*, b<sub>7</sub>/b<sub>7</sub>\* and b<sub>8</sub>/b<sub>8</sub>\* were identical to those of protonated **20**, while a mass shift of -14 Da was observed for b<sub>3</sub>/b<sub>3</sub>\*-b<sub>6</sub>/b<sub>6</sub>\* (Fig. S1.6). Similarly, y<sub>2</sub>, y<sub>7</sub> and y<sub>8</sub> ions from the fragmentation of protonated **22** were identical to those of protonated **20**, yet a mass difference of +14 Da was found for y<sub>3</sub>, y<sub>5</sub> and y<sub>6</sub> ions (Fig. S1.6). Both evidences suggested that there is a methyl functionality exchange between the 3<sup>rd</sup> and 7<sup>th</sup> amino acid residues in **22** as compared to **20**. Based on this, the amino acid sequence of **22** was deduced as THP<sub>1</sub>-Leu<sub>2</sub>-Thr<sub>3</sub>-Ile<sub>4</sub>-MeVal<sub>5</sub>-Leu<sub>6</sub>-MeGln<sub>7</sub>-MeLeu<sub>8</sub>-MeVal<sub>9</sub>-OMe. Accordingly, **M1** was postulated to be the isomeric mixture of cyclo(THP<sub>1</sub>-Leu<sub>2</sub>-MeThr<sub>3</sub>-Ile<sub>4</sub>-MeVal<sub>5</sub>-Leu<sub>6</sub>-Gln<sub>7</sub>-MeLeu<sub>8</sub>-MeVal<sub>9</sub>) and cyclo(THP<sub>1</sub>-Leu<sub>2</sub>-Thr<sub>3</sub>-Ile<sub>4</sub>-MeVal<sub>5</sub>-Leu<sub>6</sub>-MeGln<sub>7</sub>-MeLeu<sub>8</sub>-MeVal<sub>9</sub>) with a variable macrocyclization site at one of the  $\alpha$ -,  $\beta$ -,  $\gamma$ - or  $\delta$ -carbon of the THP unit.

The HRESIMS-determined molecular weight of **M2** (Fig. S17.6) is 14 Da larger than that of **4**, corresponding to the addition of an extra methyl functionality in the structure as compared to **4**. Similar to **M1**, the <sup>1</sup>H NMR spectrum of **M2** displayed resonance signals characteristic for a mixture of multiple xylomyrocin congeners despite of being eluted as a broad single chromatographic peak during HPLC analysis. Therefore, **M2** was subjected to HRESIMS/MS-based *de novo* sequencing after methanolysis-

mediated linearization. The methanolysis of **M2** resulted in a major product (**23**) that displayed an  $[M + H]^+$  ion at  $m/z$  1130.7167. All b-/b\*-type fragment ions generated from dissociation of this precursor ion (Fig. S1.7) were identical to those observed for protonated **20** (Fig. S1.4) except for b7/b7\* and b8/b8\*, which exhibited a mass difference of +14 Da each. Moreover, the detected y3 and y5–y8 ions for protonated **23** (Fig. S1.7) also showed a mass shift of +14 Da each as compared to those found for protonated **20** (Fig. S1.4). Assignment of these b-/b\*- and y-type ions indicated that **23** has an additional methyl functionality on the 7<sup>th</sup> residue as compared to **20**, and thus the peptide sequence of **23** was deduced as THP<sub>1</sub>-Leu<sub>2</sub>-MeThr<sub>3</sub>-Ile<sub>4</sub>-MeVal<sub>5</sub>-Leu<sub>6</sub>-MeGln<sub>7</sub>-MeLeu<sub>8</sub>-MeVal<sub>9</sub>-OMe. The abundance of isolated **M2** allowed large scale methanolysis and subsequent purification of **23** for 1D and 2D NMR experiments. To our surprise, the <sup>1</sup>H and <sup>13</sup>C NMR spectra of purified **23** still exhibited resonance signals for two xylomyrocin-like substances (**23a** and **23b**) with a molar ratio of 5:2 (Table S2.2). A comprehensive analysis of the COSY, TOCSY, HSQC, HMBC, and ROESY data successfully established identical planar structures for both compounds (Fig. S2) and proved that they have an identical peptide sequence which is in complete agreement with that deduced from tandem mass spectrometry. Due to the partial double-bond character of peptide bond, both cyclic and linear peptides are known to have conformational isomers originating from *cis/trans*-isomerization of specific peptide bond(s).<sup>7-8</sup> Although the *trans*-peptide bond is thermodynamically favored in unmodified peptides, the *cis*-configuration is frequently observed in *N*-methylated peptides because the energy difference between the *cis*- and *trans*-conformations with *N*-substituted amino acids is significantly reduced.<sup>9</sup> Most of the *cis*- and *trans*-isomers of a specific peptide are difficult to separate by HPLC, yet they could be differentiated by NMR spectrometry.<sup>7-8</sup> In light of this, a detailed analysis of the 2D-ROESY data of **23a** and **23b** was carried out to see if they are *cis/trans*-conformational isomers. Satisfactorily, strong ROESY correlations were observed for *N*-CH<sub>3</sub> protons of each of the five *N*-methylated amino acids with the  $\alpha$ -proton of the preceding amino acid in **23a**, indicating *trans*-configured peptide bonds between Leu<sub>2</sub> and MeThr<sub>3</sub>; Ile<sub>4</sub> and MeVal<sub>5</sub>; Leu<sub>6</sub> and MeGln<sub>7</sub>; MeGln<sub>7</sub> and MeLeu<sub>8</sub>; and MeLeu<sub>8</sub> and MeVal<sub>9</sub> (Fig. S2). Similarly, *trans*-configured peptide bonds for Ile<sub>4</sub>-MeVal<sub>5</sub>, Leu<sub>6</sub>-MeGln<sub>7</sub>, and MeGln<sub>7</sub>-MeLeu<sub>8</sub> in **23b** were evident by the presence of clear ROESY correlations between the corresponding *N*-CH<sub>3</sub> and  $\alpha$ -protons. However, the observed ROESY correlations between the  $\alpha$ -protons of Leu<sub>2</sub> and MeThr<sub>3</sub>, and MeLeu<sub>8</sub> and MeVal<sub>9</sub> strongly suggested *cis*-configured peptide bonds for Leu<sub>2</sub>-MeThr<sub>3</sub>, and MeLeu<sub>8</sub>-MeVal<sub>9</sub> (Fig. S2). Since methanolysis of **M2** resulted in a single peptide (**23**) with significantly simplified and interpretable 1D NMR spectra, **M2** was postulated to be the isomeric mixture of cyclo(THP<sub>1</sub>-Leu<sub>2</sub>-MeThr<sub>3</sub>-Ile<sub>4</sub>-MeVal<sub>5</sub>-Leu<sub>6</sub>-MeGln<sub>7</sub>-MeLeu<sub>8</sub>-MeVal<sub>9</sub>) with a variable macrocyclization site at one of the  $\alpha$ -,  $\beta$ -,  $\gamma$ - or  $\delta$ -carbon of the THP unit. Whether *cis/trans*-isomerization at Leu<sub>2</sub>-MeThr<sub>3</sub> and MeLeu<sub>8</sub>-MeVal<sub>9</sub>

exists in the macrocyclized **M2** was not clear due to the extreme complexity of the NMR spectra of **M2**.

LC-ESIMS analysis of the L- and D/L-FDLA derivatives of the acidic hydrolysate of **4** confirmed that all amino acid components of **4** are L-configured (Fig. S15.2). GC-EIMS analysis revealed that the THP residue of **4** is xylonic acid by comparing the retention time and mass spectrum of the trimethylsilyl (TMS)-derivative of THP with that of the TMS-derivative of an authentic xylonic acid standard (Fig. S16). Considering that the biosyntheses of **4**, **M1** and **M2** are carried out by the same NRPS, the absolute configurations of the amino and hydroxy acid residues in **M1** and **M2** were postulated in analogy with that of **4**.

### 1.5.3. Compounds 5–10

*Paramyrothecium roridum* MN113194 was grown on PDA medium (a total of 14 L) for 14 days, and the resulting culture was processed as described for *Paramyrothecium* sp. XJ0827. The fraction containing putative xylomyrocins (180 mg out of 1.5 g crude extract) was repeatedly purified by semi-preparative HPLC eluting with 65 % and 55 % aqueous acetonitrile containing 0.1 % formic acid at a flow rate of 2.5 mL/min to yield compounds **6** (8 mg), **7** (3 mg), **8** (3 mg), **9** (3 mg), and the mixture of **5** and **10** (5 mg).

Xylomyrocins E (**5**): white amorphous powder; UV (CH<sub>3</sub>OH)  $\lambda_{\max}$  (log  $\epsilon$ ) 205 (4.40) nm; <sup>1</sup>H and <sup>13</sup>C NMR data see Table S2.3; HRESIMS  $m/z$  1100.5845 [M + Na]<sup>+</sup> (calcd for C<sub>51</sub>H<sub>83</sub>N<sub>9</sub>O<sub>16</sub>Na, 1100.5850).

Xylomyrocins F (**6**): white amorphous powder;  $[\alpha]_D^{25}$  -167.8 (c 0.78, CH<sub>3</sub>OH); UV (CH<sub>3</sub>OH)  $\lambda_{\max}$  (log  $\epsilon$ ) 205 (4.53) nm; <sup>1</sup>H and <sup>13</sup>C NMR data see Table S2.3; HRESIMS  $m/z$  1114.6050 [M + Na]<sup>+</sup> (calcd for C<sub>52</sub>H<sub>85</sub>N<sub>9</sub>O<sub>16</sub>Na, 1114.6006).

Xylomyrocins G (**7**): white amorphous powder;  $[\alpha]_D^{25}$  -185.7 (c 0.30, CH<sub>3</sub>OH); UV (CH<sub>3</sub>OH)  $\lambda_{\max}$  (log  $\epsilon$ ) 205 (4.34) nm; <sup>1</sup>H and <sup>13</sup>C NMR data see Table S2.3; HRESIMS  $m/z$  1114.6044 [M + Na]<sup>+</sup> (calcd for C<sub>52</sub>H<sub>85</sub>N<sub>9</sub>O<sub>16</sub>Na, 1114.6006).

Xylomyrocins H (**8**): white amorphous powder;  $[\alpha]_D^{25}$  -201.5 (c 0.26, CH<sub>3</sub>OH); UV (CH<sub>3</sub>OH)  $\lambda_{\max}$  (log  $\epsilon$ ) 205 (4.46) nm; <sup>1</sup>H and <sup>13</sup>C NMR data see Table S2.4; HRESIMS  $m/z$  1128.6219 [M + Na]<sup>+</sup> (calcd for C<sub>53</sub>H<sub>87</sub>N<sub>9</sub>O<sub>16</sub>Na, 1128.6163).

Xylomyrocins I (**9**): white amorphous powder;  $[\alpha]_D^{25}$  -191.3 (c 0.22, CH<sub>3</sub>OH); UV (CH<sub>3</sub>OH)  $\lambda_{\max}$  (log  $\epsilon$ ) 205 (4.42) nm; <sup>1</sup>H and <sup>13</sup>C NMR data see Table S2.4; HRESIMS  $m/z$  1114.6055 [M + Na]<sup>+</sup> (calcd for C<sub>52</sub>H<sub>85</sub>N<sub>9</sub>O<sub>16</sub>Na, 1114.6006).

Xylomyrocins J (**10**): white amorphous powder; UV (CH<sub>3</sub>OH)  $\lambda_{\max}$  (log  $\epsilon$ ) 205 (4.40) nm; <sup>1</sup>H and <sup>13</sup>C NMR data see Table S2.4; HRESIMS  $m/z$  1128.6173 [M + Na]<sup>+</sup> (calcd for C<sub>53</sub>H<sub>87</sub>N<sub>9</sub>O<sub>16</sub>Na, 1128.6163).

The positive mode HRESIMS spectrum of **6** showed an [M + Na]<sup>+</sup> ion at  $m/z$  1114.6050 (Fig. S17.8), and the <sup>13</sup>C NMR spectrum displayed resonances for a total of 52 carbons (Table S2.3). Based on these

spectroscopic data, a molecular formula of  $C_{52}H_{85}N_9O_{16}$ , requiring 15 degrees of unsaturation, was deduced for **6**. An initial examination of the  $^1H$  and  $^{13}C$  NMR spectra of **6** revealed significant similarity to those of previously characterized xylomyrocins (Table S2.3). Structural elucidation of **6** was then carried out through concerted analysis of the 2D NMR spectra. Eleven proton-proton spin systems were identified by interpretation of COSY and TOCSY correlations (Fig. S2), and the carbons to which the protons attach were assigned based on HSQC data. Further analysis of the HMBC and ROESY data (Fig. S2) correlated these spin systems to nine amino acid residues, including Gly, Ile (2 $\times$ ), Leu, *N*-methylalanine (MeAla), MePhe, MeThr, Ser, and Val, and one THP unit, and established a linear peptide sequence of THP<sub>1</sub>-Leu<sub>2</sub>-MeThr<sub>3</sub>-Val<sub>4</sub>-MePhe<sub>5</sub>-Gly<sub>6</sub>-Ile<sub>7</sub>-Ser<sub>8</sub>-Ile<sub>9</sub>-MeAla<sub>10</sub>. This interpretation was further supported by HRESIMS/MS-based *de novo* sequencing (Fig. S1.9) of the methoxy-substituted derivative of **6** (**25**). Finally, the HMBC correlation between the  $\alpha$ -H of THP<sub>1</sub> ( $\delta_H$  4.99) and the carbonyl carbon of MeAla<sub>10</sub> ( $\delta_C$  170.17) helped determine the macrocyclization position (Fig. S2), and fully established the planar structure of **6**.

The HRESIMS-determined molecular formulae of **7** and **9** ( $C_{52}H_{85}N_9O_{16}$ ) were identical to that of **6**, and the  $^1H$  and  $^{13}C$  NMR data (Table S2.3 and S2.4) of these three compounds were also remarkably similar to each other. A comprehensive analysis of the COSY, TOCSY, HSQC, HMBC, and ROESY data (Fig. S2) revealed that the only difference between **6** and **7** was the switch of amino acid residues at the 4<sup>th</sup> and 9<sup>th</sup> position: **6** adopts Val and Ile as the 4<sup>th</sup> and 9<sup>th</sup> residue, respectively, while **7** has Ile and Val instead at the same location. Interpretation of the HRESIMS/MS spectrum of linearized **7** (**26**) (Fig. S1.10) gave a peptide sequence which further confirmed the planar structure of **7** as cyclo(THP<sub>1</sub>-Leu<sub>2</sub>-MeThr<sub>3</sub>-Ile<sub>4</sub>-MePhe<sub>5</sub>-Gly<sub>6</sub>-Ile<sub>7</sub>-Ser<sub>8</sub>-Val<sub>9</sub>-MeAla<sub>10</sub>). On the other hand, elucidation of the NMR spectroscopic data (Fig. S2) indicated that the identity and sequential order of the amino/hydroxy acid residues of **6** and **9** were exactly the same, yet the macrocyclization site in these two compounds was different: instead of the  $\alpha$ -OH, **9** utilizes the  $\delta$ -OH of THP<sub>1</sub> to form the cyclodepsipeptide ring. A molecular formula of  $C_{53}H_{87}N_9O_{16}$  was deduced for **8** based on the  $[M + Na]^+$  ion at  $m/z$  1128.6219 in the positive mode HRESIMS spectrum (Fig. S17.10), indicating the addition of a CH<sub>3</sub> group in **8** as compared to **6**, **7**, and **9**. Indeed, a thorough interpretation of the 2D NMR data (Fig. S2) confirmed that the planar structure of **8** was almost identical to those of **6** and **7**, except that the 4<sup>th</sup> and 9<sup>th</sup> residues were both Ile.

Compounds **5** and **10** were eluted together during HPLC, and displayed  $[M + Na]^+$  ions at  $m/z$  1100.5845 and 1128.6173, respectively, in their positive mode HRESIMS spectra (Fig. S17.7). The molecular formula deduced for **5** ( $C_{51}H_{83}N_9O_{16}$ ) was one CH<sub>2</sub> unit less than that of **6**, **7**, and **9**, indicating **5** is the demethylated derivative of these xylomyrocins. On the other hand, the molecular formula determined for **10** ( $C_{53}H_{87}N_9O_{16}$ ) was identical to that of **8**, suggesting they are regio- or stereo-isomers.

The  $^1\text{H}$  and  $^{13}\text{C}$  NMR spectra of the mixture of **5** and **10** were relatively complex, yet all resonances could be clearly differentiated and assigned to **5** and **10** by detailed analysis of the 2D NMR data (Table S2.3 and S2.4). The molar ratio between **5** and **10** was inferred as 1:1 by comparing the integrals of the  $^1\text{H}$  NMR signals corresponding to these two compounds. Careful interpretation of COSY, TOCSY, HSQC, HMBC, and ROESY correlations (Fig. S2), along with detailed analysis of the tandem mass spectra of the linearized **5** (**24**) and **10** (**27**) (Fig. S1.8 and S1.11), revealed that the planar structure of **5** closely resembles those of **6** and **7**, except that **5** has Val at both 4<sup>th</sup> and 9<sup>th</sup> positions. In contrast, the peptide sequence established for **10** was exactly the same as that of **8**, yet a different -OH donor ( $\delta$ -OH of THP) was used to construct the macrolactone ring in **10**.

To determine the absolute configuration of the amino acid residues present in **5-10**, the relatively abundant **6** was selected for acidic hydrolysis and Marfey's analysis. The LC-ESIMS result showed that all chiral amino acids found in **6** were L-configured (Fig. S15.3). GC-EIMS analysis confirmed that the THP residue of **6** is xylonic acid by comparing the retention time and mass spectrum of the TMS-derivative of THP with that of the TMS-derivative of an authentic xylonic acid standard (Fig. S16). Since all xylomyrocins produced by *Paramyrothecium roridum* MN113194 share the same biosynthetic origin, the amino/hydroxy acid residues in **5** and **7-10** were postulated in analogy with that of **6**.

#### 1.5.4. Compounds **11** and **12**

*Colletotrichum* sp. XJ1040 was grown on MMK2 medium (a total of 12 L) for 14 days, and the resulting culture was processed as described for *Paramyrothecium* sp. XJ0827. The fraction containing putative xylomyrocins (750 mg out of 2.6 g crude extract) was purified by semi-preparative HPLC eluting with 75 % aqueous acetonitrile containing 0.1 % formic acid at a flow rate of 2.5 mL/min to give compounds **11** (26 mg) and **12** (2 mg).

Xylomyrocin K (**11**): white amorphous powder;  $[\alpha]_{\text{D}}^{25} -181.3$  (*c* 0.68,  $\text{CH}_3\text{OH}$ ); UV ( $\text{CH}_3\text{OH}$ )  $\lambda_{\text{max}}$  ( $\log \epsilon$ ) 205 (4.43) nm;  $^1\text{H}$  and  $^{13}\text{C}$  NMR data see Table S2.5; HRESIMS  $m/z$  1128.7036  $[\text{M} + \text{H}]^+$  (calcd for  $\text{C}_{54}\text{H}_{98}\text{N}_9\text{O}_{16}$ , 1128.7126).

Xylomyrocin L (**12**): white amorphous powder;  $[\alpha]_{\text{D}}^{25} -132.2$  (*c* 0.18,  $\text{CH}_3\text{OH}$ ); UV ( $\text{CH}_3\text{OH}$ )  $\lambda_{\text{max}}$  ( $\log \epsilon$ ) 205 (4.62) nm;  $^1\text{H}$  and  $^{13}\text{C}$  NMR data see Table S2.5; HRESIMS  $m/z$  1128.7115  $[\text{M} + \text{H}]^+$  (calcd for  $\text{C}_{54}\text{H}_{98}\text{N}_9\text{O}_{16}$ , 1128.7126).

The molecular formula of **11** was determined as  $\text{C}_{54}\text{H}_{97}\text{N}_9\text{O}_{16}$ , requiring 11 degrees of unsaturation, based on the  $[\text{M} + \text{H}]^+$  ion found in the positive mode HRESIMS spectrum (Fig. S17.12). The  $^1\text{H}$  and  $^{13}\text{C}$  NMR spectra of **11** (Table S2.5) exhibited characteristic resonances for a peptidic structure, e.g. six amide protons resonating at 7.31–8.85 ppm, 10 carbonyl carbons resonating at 167.7–172.8 ppm, and 15

heteroatom-bearing carbons resonating at 51.6–75.3 ppm. The absence of  $^{13}\text{C}$  NMR signals in the range of 100–160 ppm indicated the lack of aromatic amino acid residues in the structure of **11**. A detailed analysis of the 2D NMR data (Fig. S2) revealed that **11** consisted of seven aliphatic amino acids, including Ile (3 $\times$ ), MeLeu, MeVal, and Val (2 $\times$ ), two hydroxylic amino acids including MeThr and Ser, and one THP unit. Ten carbonyl functionalities of these amino/hydroxy acid residues accounted for 10 of the 11 degrees of unsaturation in **11**, leaving the remaining one degree of unsaturation for a cyclic structure. Careful interpretation of the HMBC and ROESY correlations (Fig. S2), along with detailed analysis of the tandem mass spectrum of linearized **11** (**28**) (Fig. S1.12) successfully established the connectivities of the 10 residues and established the planar structure of **11**.

A comprehensive analysis of the HRESIMS and NMR spectroscopic data (Fig. S17.13 and Table S2.5) suggested that **12** was a cyclic decadepsipeptide with the sequence of cyclo(THP<sub>1</sub>-Val<sub>2</sub>-MeThr<sub>3</sub>-Ile<sub>4</sub>-MeVal<sub>5</sub>-Val<sub>6</sub>-Ile<sub>7</sub>-Ser<sub>8</sub>-Ile<sub>9</sub>-MeLeu<sub>10</sub>). The deshielded  $\gamma$ -CH of THP moiety in **12** ( $\delta_{\text{H}}$  5.00,  $\delta_{\text{C}}$  76.53) strongly indicated that the  $\gamma$ -OH of THP<sub>1</sub> was used to form the macrolactone ring with the carbonyl carbon of MeLeu<sub>10</sub>. Thus, the planar structure of **12** was determined as shown in Fig. S2.

LC-ESIMS analysis of the L- and D/L-FDLA derivatives of the acidic hydrolysate of **11** confirmed that all amino acid residues of **11** are L-configured (Fig. S15.4), while GC-EIMS analysis of the TMS-derivatives of the acidic hydrolysate of **11** demonstrated that the THP moiety is xylonic acid (Fig. S16). Considering that **11** and **12** are biosynthesized by the same NRPS, the absolute configurations of the amino/hydroxy acid residues in **12** were postulated in analogy with that of **11**.

### 1.6. Advanced Marfey's analysis

500  $\mu\text{g}$  of the appropriate xylomyrocin congener was hydrolyzed in 6 N HCl at 115  $^{\circ}\text{C}$  for 18 hrs. The hydrolysate was dried under vacuum, and dissolved in 100  $\mu\text{L}$   $\text{H}_2\text{O}$ . An 50  $\mu\text{L}$  aliquot of this solution was treated with 20  $\mu\text{L}$  of 1 M  $\text{NaHCO}_3$  and 100  $\mu\text{L}$  of 1 % 1-fluoro-2,4-dinitrophenyl-5-L-leucinamide (L-FDLA) in acetone, while the other 50  $\mu\text{L}$  aliquot was treated with 20  $\mu\text{L}$  of 1 M  $\text{NaHCO}_3$  and 100  $\mu\text{L}$  of D/L-FDLA. The reaction mixtures were heated at 45  $^{\circ}\text{C}$  for 2 hrs. After cooling to room temperature, the reactions were quenched with 10  $\mu\text{L}$  of 2 N HCl. Then, the resulting residues were diluted with 1 mL of 50 % aqueous  $\text{CH}_3\text{CN}$  for subsequent LC-ESIMS analysis. The FDLA-derivative of each amino acid (AA) residue was identified in the extracted ion chromatogram based on the corresponding  $m/z$  value. The absolute configurations of constituent AA residues were determined by comparing the retention times of AA-L-FDLA with those of AA-D/L-FDLA derivative, and by applying the empirical rule that the L-AA-L-FDLA / D-AA-D-FDLA derivatives are always eluted earlier from the reverse phase C18 column than the L-AA-D-FDLA / D-AA-L-FDLA derivatives.<sup>6</sup> The LC-ESIMS spectra of the AA-L-FDLA and AA-D/L-FDLA derivatives are shown



in Figure S15.

### 1.7. X-ray crystallographic analysis

X-ray crystallographic data of **3** were collected on an XtaLAB Synergy R, HyPix diffractometer (Rigaku Corporation, Tokyo, Japan) using Cu K $\alpha$  radiation. The crystal was kept at 100 K during data collection. The structure was solved in Olex2<sup>10</sup> with the ShelXT<sup>11</sup> structure solution program using Intrinsic Phasing and refined with the ShelXL<sup>11</sup> refinement package using Least Squares minimisation. The X-ray crystallographic data has been deposited in the Cambridge Crystallographic Data Centre with the deposition number CCDC 2119453. Copies of these data can be obtained free of charge via [www.ccdc.cam.ac.uk/data\\_request/cif](http://www.ccdc.cam.ac.uk/data_request/cif), or by emailing [data\\_request@ccdc.cam.ac.uk](mailto:data_request@ccdc.cam.ac.uk), or by contacting the Cambridge Crystallographic Data Centre, 12, Union Road, Cambridge CB2 1EZ, UK; fax: (+44) 1223-336-033.

### 1.8. GC-EIMS analysis

Gas Chromatography-Electron Impact Mass Spectrometry (GC-EIMS) analysis was carried out on an Agilent 7890A GC system coupled with an Agilent 7000B triple quadrupole mass spectrometer (Agilent Technologies Inc., Santa Clara, CA, USA). The GC-EIMS instrument was equipped with an Agilent HP-5 capillary column (30 mm  $\times$  0.25 mm  $\times$  0.25  $\mu$ m). The sample was injected in a common splitless mode with an inlet temperature of 280  $^{\circ}$ C, and the flow rate was set to 1 mL/min using helium as the constant carrier gas. The initial column temperature was 100  $^{\circ}$ C, raised to 150  $^{\circ}$ C at the rate of 20  $^{\circ}$ C/min and then to 310  $^{\circ}$ C at the rate of 5  $^{\circ}$ C/min, and finally maintained at 310  $^{\circ}$ C for an additional 10 min. For the EIMS detection, the ion source temperature was set to 250  $^{\circ}$ C, and mass data acquisition was operated in full scan mode ( $m/z$  50–900). The acid hydrolysate of the appropriate xylomyrocin congener was dried under vacuum, and the residue was dissolved in 500  $\mu$ L anhydrous pyridine (Sigma-Aldrich, Saint Louis, MO, United States). An 80  $\mu$ L aliquot of this solution was mixed with 80  $\mu$ L *N,O*-bis(trimethylsilyl)trifluoroacetamide (BSTFA) + 1 % trimethylchlorosilane (TMCS) (Sigma-Aldrich, Saint Louis, MO, United States). The silylation reaction was carried out at 70  $^{\circ}$ C for 90 min, and 1  $\mu$ L of the reaction mixture was used for GC-EIMS analysis.

### 1.9. Genomic DNA preparation

*Paramyrothecium* sp. XJ0827 was grown in potato dextrose broth (PDB; potato starch 4 g/L, dextrose 20 g/L) at 28  $^{\circ}$ C with shaking at 220 rpm for 5 days. The mycelium was collected by filtration, washed with water, and dried with paper towels. The dried mycelia were frozen in liquid nitrogen and ground in a mortar. The resulting powder was suspended in Lysis buffer (solution A 370 ml/L, solution B 370 ml/L, solution C 148 ml/L, 0.1 % polyvinylpyrrolidone 100 ml/L, proteinase K 7 ml/L. Solution A: 0.35 M sorbitol, 0.1 M Tris-HCl pH 9, 5 mM EDTA pH 8; solution B: 0.2 M Tris-HCl pH 9, 50 mM EDTA pH 8, 2 M NaCl, 2 %

cetyltrimethylammonium bromide [CTAB]; solution C: 5 % N-laroylsarcosine sodium salt), and incubated at 65 °C for 30 min. Next, 0.33 volume of 5 M potassium acetate was added to the suspension. After incubation on ice for 30 min, the suspension was centrifuged at 10,000 × g, 4 °C for 20 min. To the supernatant was added 1 volume of chloroform:isoamylalcohol (24:1), vortexed for 15 sec, and centrifuged at 10,000 × g, 4 °C for 10 min. The aqueous phase was treated with RNase A at 37 °C for 90 min, followed by addition of 0.1 volume of 3 M sodium acetate and 1 volume of isopropanol. After incubation at room temperature for 5 min, the genomic DNA was recovered by centrifugation at 10,000 × g, 4 °C for 30 min. The pellet was washed with 70 % aqueous ethanol and allowed to dry at room temperature for 5 min. The isolated DNA was resuspended in TE buffer (10 mM Tris-HCl pH 8, 1 mM EDTA), and stored at –20 °C until further use.

#### **1.10. Genome sequencing and annotation**

The genome of *Paramyrothecium* sp. XJ0827 was sequenced using a combination of Illumina NovaSeq and Oxford Nanopore technologies. For Illumina sequencing, genomic DNA was extracted and randomly fragmented, and DNA fragments with the required lengths were isolated by electrophoresis. After ligation with adapters, DNA fragments were sequenced. For Nanopore sequencing, DNA samples were sheared using a G-tube, the fragments were end-repaired, and both ends of the DNA fragments were ligated with adapters to generate the sequencing library. Quality control was performed at each stage of the sample preparation and sequencing. The obtained nanopore subreads were corrected and then assembled using canu.<sup>12</sup> Single base errors in the assembly were further corrected with Illumina NovaSeq data using GATK.<sup>13-14</sup> Contigs were linked to scaffolds with long insert size pair-end reads using SSPACE\_Basic\_v2.0.<sup>15</sup> The gaps were filled using pbjelly2.<sup>16</sup> The predicted proteins were compared to various databases using blastp, and the highest quality alignments were chosen. The databases and versions were: Gene Ontology (GO), release\_2017-09-08; Kyoto Encyclopedia of Genes and Genomes (KEGG), version 81; Cluster of Orthologous Groups of proteins (COG), version 2014-11-10; Swiss-Prot, release 2017-07; Trembl, release-2017-09; NR, version 2017-10-10; EggNOG, version 4.5.

#### **1.11. Accession numbers**

The genome assembly of *Paramyrothecium* sp. XJ0827 has been deposited in the NCBI GenBank as BioProject: PRJNA770833 with the accession number JAJFPB000000000. Accession numbers for the proteins encoded by the *Paramyrothecium* sp. XJ0827 and the *P. roridum* NRRL 2183 *xmc* biosynthetic gene clusters are shown in Tables S8 and S15, respectively. Accession numbers for the additional putative xylose metabolic enzymes from both fungi, and putative xylan degradation enzymes from

*Paramyrothecium* sp. XJ0827 are listed in Tables S9 and S10, respectively.

### **1.12. Total RNA extraction and cDNA synthesis**

*Paramyrothecium* sp. XJ0827 was cultured in liquid M-100 medium (D-glucose 10 g/L, KNO<sub>3</sub> 3 g/L, salt solution 62.5 mL/L. Salt solution: KH<sub>2</sub>PO<sub>4</sub> 16 g/L, Na<sub>2</sub>SO<sub>4</sub> 4 g/L, KCl 8 g/L, MgSO<sub>4</sub>·7H<sub>2</sub>O 2 g/L, CaCl<sub>2</sub> 1 g/L, trace element solution 8 mL/L; trace element solution: H<sub>3</sub>BO<sub>3</sub> 60 mg/L, MnCl<sub>2</sub>·4H<sub>2</sub>O 140 mg/L, Na<sub>2</sub>MoO<sub>4</sub>·2H<sub>2</sub>O 400 mg/L, FeCl<sub>3</sub>·6H<sub>2</sub>O 100 mg/L, CuSO<sub>4</sub>·5H<sub>2</sub>O 400 mg/L) with shaking at 28 °C, 220 rpm for 5 days (start of the accumulation of compounds **1–3**); 7 days (the active production phase for **1–3**); or 9 days (late production phase for **1–3**). The mycelium was collected by filtration, washed with water, and dried with a paper towel. The dried mycelia were frozen in liquid nitrogen and ground into a fine powder. The resulting powder was suspended in Trizol (Thermo Fisher Scientific, Wilmington, DE, United States) and mixed by vortexing. The suspension was kept at room temperature for 15 min, then centrifuged at 10,000 × g, 4 °C for 10 min. The supernatant was transferred to a clean Eppendorf tube, mixed with chloroform by gently inverting the tube, and kept at room temperature for 15 min. After centrifugation at 10,000 × g, 4 °C for 10 min, the aqueous phase was collected, and the RNA was precipitated with isopropanol. The RNA was collected by centrifugation at 10,000 × g, 4 °C for 10 min, and the pellet was washed with 70 % aqueous ethanol and air dried at room temperature. The isolated total RNA was resuspended in diethylpyrocarbonate (DEPC)-treated sterile water. RNA concentration and purity were estimated from the optical density ratio at A<sub>260</sub>/A<sub>280</sub> and A<sub>260</sub>/A<sub>230</sub> using a NanoDrop 2000 spectrophotometer (Thermo Fisher Scientific, Wilmington, DE, United States). The integrity of the RNA was evaluated by electrophoresis. cDNA was prepared from the total RNA using the PrimeScript RT kit (Takara Bio Inc., Shiga, Japan), and stored at –20 °C for further use.

### **1.13. Reverse transcription - quantitative PCR (RT-qPCR) analysis.**

RT-qPCR was performed using the ABI Prism 7500 real-time PCR system (Applied Biosystems, Foster City, CA, United States), in a final reaction volume of 20 µL containing cDNA, Power SYBR Green PCR master mix (Thermo Fisher Scientific, Wilmington, DE, United States), and the appropriate primers (final concentration: 200 nM each) listed in Table S17. PCR amplification was conducted with an initial denaturation cycle of 30 sec at 95 °C; 40 cycles of 5 sec at 95 °C for denaturation, 30 sec at 60 °C for primer annealing and extension; and a melt-curve stage consisting of 15 sec at 95 °C, 1 min at 60 °C, 30 sec at 95 °C, and finally 15 sec at 60 °C. The tubulin-encoding gene was used as the reference gene, and the relative expression fold-change was calculated using the comparative threshold cycle  $2^{-\Delta\Delta CT}$  method. Three biological replicates were analyzed, and for each sample, three technical replicates for each targeted gene

were performed.

#### **1.14. Knockout of the *pxxmc* biosynthetic genes**

The flanking regions of the target genes were amplified from the genomic DNA of *Paramyrothecium* sp. XJ0827 using appropriate primers that also included specific cloning end regions that are complementary to the 5'- or 3'-ends of the linearized pJET1.2 vector and those of the hygromycin B phosphotransferase gene (*hph*) cassette (Table S17). The resulting targeting arms were fused with the hygromycin resistance cassette and cloned into the pJET1.2 vector using the ClonExpress MultiS one step cloning kit (Vazyme Biotech Co., Ltd., Nanjing, Jiangsu, China) to generate the gene deletion plasmids. The linear gene deletion cassettes were amplified from these plasmids and transformed into *Paramyrothecium* sp. XJ0827 protoplasts using PEG-mediated transformation as described for *Aspergillus nidulans*<sup>17</sup>, with slight modifications. Briefly, protoplasts were generated from germlings using osmotic buffer (1.2 M MgSO<sub>4</sub>·7H<sub>2</sub>O, 10 mM PBS adjusted to pH 5.8 with 1 M Na<sub>2</sub>HPO<sub>4</sub>) containing 5 mg/mL Lysing enzyme (Sigma-Aldrich, Saint Louis, MO, United States) and 2 mg/mL Yatalase (Takara Bio Inc., Shiga, Japan) at 37 °C with gentle shaking at 80 rpm for 6 hrs. The reaction mixture was transferred to a 50 mL OakRidge Makrolon tube and kept on ice. After the addition of trapping buffer (0.6 M sorbitol, 0.1 M Tri-HCl pH 7.0) and centrifugation at 5,000 × g, 4 °C for 15 min, the protoplasts were recovered from the middle layer. The harvested protoplasts were washed with STC solution (1.2 M sorbitol, 10 mM CaCl<sub>2</sub>, 0.1 M Tri-HCl pH 7.5), centrifuged at 6,000 × g, 4 °C for 8 min, and then resuspended in STC solution. For transformation, 800–1,500 ng linear DNA fragment was added to 100 µL protoplast solution, and incubated on ice for 50 min. After addition of 1.25 mL PEG solution (60 % PEG 4,000, 50 mM CaCl<sub>2</sub>, 50 mM Tris-HCl pH 7.5), the mixture was kept at room temperature for 20 min. After further dilution with STC solution, the protoplasts were plated on selective medium (M-100 agar medium containing 50 µg/mL hygromycin B) in a 4 mL soft agar overlay. Non-selective medium was used to determine the viability of protoplasts. The cultures were incubated at 28 °C for 5–7 days, hygromycin B resistant colonies were isolated, and gene knockouts were verified by PCR using multiple primers (Table S17; Figure S5).

#### **1.15. Culturing, feeding, and extraction of *Paramyrothecium* sp. XJ0827 with <sup>13</sup>C-labeled monosaccharides for MS analysis.**

Thirty milliliters of regular or modified M-100 media (in modified M-100 medium, D-glucose-<sup>13</sup>C<sub>6</sub> [Cambridge Isotope Laboratories, Andover, MA, USA] replaces D-glucose as the sole carbon source) were inoculated with the wild type or the  $\Delta$ *pxxmcE* strains of *Paramyrothecium* sp. XJ0827 and incubated with shaking at 28 °C for nine days. After centrifugation, the liquid media were extracted with equal volume of

EtOAc, while the fungal mycelia were extracted with 15 mL methanol. The organic solutions were combined, concentrated under vacuum, and dissolved in 1 mL methanol for subsequent LC-ESIMS analysis. For the feeding experiment with stable isotope-labeled D-xylose, regular M-100 medium was used to cultivate the wild type or the  $\Delta pxxmcE$  strains of *Paramyothecium* sp. XJ0827 at 28 °C with shaking. D-xylose-1-<sup>13</sup>C (Cambridge Isotope Laboratories, Andover, MA, USA) was supplemented to the culture at a final concentration of 17 mM at day 7. Fermentation was continued for another three days to facilitate complete utilization of the supplemented substrate, and the extraction was carried out as described above.

The [M+H]<sup>+</sup> ion of **1** extracted from cultures of the WT and the  $\Delta pxxmcE$  strains grown in the modified M-100 medium exhibited a +54 Da mass shift ( $m/z$  1175.2) as compared to that of **1** extracted from cultures grown in regular M-100 medium ( $m/z$  1120.8), indicating all carbons in **1** (C<sub>54</sub>H<sub>89</sub>N<sub>9</sub>O<sub>16</sub>) were isotopically labeled (Fig. S6). This confirmed that D-glucose can be used by the fungus as the sole carbon source to produce xylomyrocins, including the D-xylonic acid unit. On the other hand, supplementation of D-xylose-1-<sup>13</sup>C to regular M-100 medium resulted in an obvious increment of abundancies of the +1, +2, and +3 Da isotopic peaks of the [M+H]<sup>+</sup> ion of **1** at  $m/z$  1120.8 (Fig. S6). Tandem mass analysis of this <sup>13</sup>C-labeled **1** after methanolysis-mediated linearization revealed that the Xyl<sub>1</sub> unit is isotopically labeled, probably at the carbonyl carbon (Fig. S7). This strongly supports that the D-xylonic acid building block in xylomyrocins is directly synthesized from D-xylose via PxxMcE-catalyzed dehydrogenation, while D-xylose could be supplied from either monosaccharide interconversions (endogenous route) or hemicellulose metabolism (exogenous route).

#### 1.16. Cloning and expression of PxxMcG-A<sub>1</sub>T<sub>1</sub> and PxxMcG-A<sub>1</sub>.

The A<sub>1</sub>T<sub>1</sub> di-domain (M265 – Y912) and the A<sub>1</sub> mono-domain (M265 – E819) of PxxMcG were amplified by PCR from the cDNA of *Paramyothecium* sp. XJ0827 using appropriate primers for expression as N-terminally or C-terminally His-tagged proteins (Table S17). The PCR products were ligated into pET28a using In-Fusion cloning as *NdeI-XhoI* fragments to afford pET28a-N-His-PxxMcG-A<sub>1</sub>T<sub>1</sub> and pET28a-N-His-PxxMcG-A<sub>1</sub>, and as *NcoI-XhoI* fragments to yield pET28a-C-His-PxxMcG-A<sub>1</sub>T<sub>1</sub> and pET28a-C-His-PxxMcG-A<sub>1</sub>. The cloned genes were validated by sequencing.

Each of the four constructs was then introduced separately into *E. coli* BL21 for overexpression. Three independent transformants representing each of the constructs were grown at 37 °C with shaking at 250 rpm until the OD<sub>600</sub> reached 0.8–1.0. After cooling to 25 °C, 16 °C, or 11 °C, isopropyl β-D-thiogalactopyranoside (1, 0.5, or 0.15 M) was supplemented to the cultures. After continued cultivation with shaking at 25 °C, 16 °C, or 11 °C for 18 hrs or 24 hrs, the cells were harvested by centrifugation at 6,000 rpm for 10 min. The harvested cells were resuspended in disruption buffer (50 mM Tris-HCl, 150

mM NaCl, pH 7.5) and disrupted by sonication on ice. After centrifugation, the cleared lysates and cell pellets were analyzed by SDS-PAGE to monitor the expression of the target protein (Fig. S13).

### 1.17. Antimicrobial activity evaluation

*Plasmodium falciparum* strain 3D7 was used in antimalaria tests. Fresh O-type human erythrocytes were obtained from volunteers, with the samples de-identified before they were used in our study. Cultivation of *P. falciparum* was carried out as described previously.<sup>18</sup> *P. falciparum* 3D7 parasites were maintained in RPMI 1640 complete medium with 25 mM HEPES, 50 mg/L hypoxanthine, 2.1 g/L NaHCO<sub>3</sub>, and 0.5 % AlbuMAX® I Lipid-Rich Bovine Serum Albumin, adjusted to pH7.2-7.4. Synchronous ring-stage *P. falciparum* was generated using 5 % sorbitol, and diluted with complete medium and normal human erythrocytes to a starting 2 % hematocrit and 0.5 % parasitemia. 90 µL of this cell suspension was split into each test well, and wells containing non-parasitized erythrocytes at 4 % hematocrit served as reference controls. Stock solutions of the test compounds (in DMSO) were prepared at a concentration of 10 mM, serially diluted in complete medium, and dispensed into triplicate test wells to give a final well volume of 100 µL with the final concentrations of test compounds ranging from 0 to 10<sup>-5</sup> M. After 48 hrs of incubation at 37 °C, the widely-adopted fluorescence-based method<sup>18</sup> was used to evaluate the antiprotozoal activity of xylomyrocins against *P. falciparum*. Briefly, 100 µl supernatant was removed in to a 96-well plate and 100 µl SYBR green-I solution with lysis buffer [20 mM Tris, pH 7.5, 5 mM EDTA, 0.008 % (wt/vol) saponin and 0.08 % (vol/vol) Triton X-100] was added to each well. The plates were then incubated for 2 h in the dark at room temperature. All the plates were read using a fluorescence plate reader, with excitation and emission wavelengths of 485 and 535 nm, respectively. The background reading for an empty well was subtracted to yield fluorescence counts for the assessment of parasite viability. The inhibition rate was calculated relative to the parasite-growth-medium negative control (0 % inhibition). Three biological replicates were assayed.

Two strains of the Gram-positive bacteria *Staphylococcus aureus*: subsp. *aureus* Rosebach (ATCC 6538) and methicillin-resistant *S. aureus* (MRSA) 11646, and one Gram-negative bacterium *Escherichia coli* ATCC 25922 were used to evaluate the antibacterial activity of isolated xylomyrocins. Antibacterial assays were carried out utilizing the two-fold serial broth microdilution method with slight modifications.<sup>19</sup> Briefly, each test bacterial strain was inoculated into Luria-Bertani (LB, 10 g/L tryptone, 10 g/L NaCl, 5 g/L yeast extract) broth, and incubated at 37 °C with shaking at 150 rpm for 12 hrs. The bacterial cultures were diluted 1,000-fold with fresh LB medium once the OD<sub>600</sub> reached 0.8. The stock solutions of test compounds (in DMSO) were diluted with LB medium to give serial two-fold dilutions. The final concentrations of each compound in the wells were 20, 10, 5, 2.5, 1.2, and 0.6, 0.3, 0.15 µg/mL. Kanamycin was used as the positive control.

Negative control wells were treated with DMSO instead of the test compound, and blank control wells contain LB medium only. The plates were incubated at 37 °C for 7 hrs. Finally, 10 µL of CCK-8 solution from the Cell Counting Kit-8 (Dojindo, Shanghai, China) was added to each well and incubated at 37 °C for an additional 1.5 hrs. The absorbance at 450 nm was measured on a FlexStation 3 microplate reader (Molecular Devices, San Jose, CA, USA). MIC values were defined as the lowest concentrations of the test compounds that inhibited bacterial growth.

Antifungal activity was evaluated against two fungal pathogens of high medical relevance, *Cryptococcus neoformans* H99 and *Candida albicans* SC5314 as described previously with slight modifications.<sup>20</sup> Briefly, the MIC was determined with the serial microdilution method in 96-well plates with MOPS buffered RPMI-1640 as the growth medium. The cell suspension was incubated with serial dilutions of various xylomyrocins at a dose range of 20–0.15 µg/mL. Amphotericin B and pneumocandin B<sub>0</sub> were used as positive controls. Cells were incubated at 25 °C (mimicking the environmental condition) and 37 °C (mimicking the host condition), and 10 µL of CCK-8 were added into each well at 24 hrs for *C. albicans*, and at 48 hrs for *C. neoformans*. Viability was determined with a FlexStation 3 microplate reader (Molecular Devices, San Jose, CA, USA). MIC value was defined as the lowest concentration of the test compound that resulted in a culture with unchanged density (100% inhibition when compared to the growth of the untreated control).

## 2. SI Tables

**Table S1. Taxonomic information on the 182 fungal isolates identified by MALDI-TOF MS to produce peptide-like SMs**

| Genera                | Number of strains | Genera                 | Number of strains |
|-----------------------|-------------------|------------------------|-------------------|
| <i>Acremonium</i>     | 4                 | <i>Lecanicillium</i>   | 1                 |
| <i>Alternaria</i>     | 2                 | <i>Leptosphaeria</i>   | 2                 |
| <i>Aspergillus</i>    | 13                | <i>Mortierella</i>     | 8                 |
| <i>Auxarthron</i>     | 1                 | <i>Mucor</i>           | 1                 |
| <i>Beauveria</i>      | 1                 | <i>Myceliophthora</i>  | 1                 |
| <i>Bionectria</i>     | 4                 | <i>Myrothecium</i>     | 5                 |
| <i>Camarosporium</i>  | 1                 | <i>Paecilomyces</i>    | 1                 |
| <i>Cladosporium</i>   | 1                 | <i>Paramyrothecium</i> | 1                 |
| <i>Chrysosporium</i>  | 1                 | <i>Penicillium</i>     | 13                |
| <i>Clonostachys</i>   | 9                 | <i>Phaeosphaeria</i>   | 1                 |
| <i>Colletotrichum</i> | 1                 | <i>Purpureocillium</i> | 11                |
| <i>Coniothyrium</i>   | 1                 | <i>Scopulariopsis</i>  | 1                 |
| <i>Cordyceps</i>      | 5                 | <i>Scytalidium</i>     | 1                 |
| <i>Doratomyces</i>    | 1                 | <i>Stachybotrys</i>    | 1                 |
| <i>Fusarium</i>       | 59                | <i>Tolypocladium</i>   | 1                 |
| <i>Gibberella</i>     | 4                 | <i>Trichoderma</i>     | 23                |
| <i>Keissleriella</i>  | 1                 | <i>Wojnowiciella</i>   | 1                 |



Table S2. <sup>1</sup>H NMR and <sup>13</sup>C NMR dataTable S2.1. Compounds 1–3<sup>a</sup>

| no.                      | 1                      |                                              | 2                      |                                              | 3                      |                                              |
|--------------------------|------------------------|----------------------------------------------|------------------------|----------------------------------------------|------------------------|----------------------------------------------|
|                          | $\delta_c$ , type      | $\delta_H$ , mult. J in Hz                   | $\delta_c$ , type      | $\delta_H$ , mult. J in Hz                   | $\delta_c$ , type      | $\delta_H$ , mult. J in Hz                   |
| <b>Xyl<sub>1</sub></b>   |                        |                                              |                        |                                              |                        |                                              |
| C=O                      | 170.47, C              |                                              | 174.90, C              |                                              | 174.56, C              |                                              |
| $\alpha$                 | 76.60, CH              | 5.08, d 2.0                                  | 71.60, CH              | 4.02, m <sup>b</sup>                         | 72.14, CH              | 4.15, d 2.0                                  |
| $\beta$                  | 73.43, CH              | 4.04, m <sup>b</sup>                         | 68.70, CH              | 4.01, m <sup>b</sup>                         | 74.79, CH              | 3.91, dd 6.5, 2.0                            |
| $\gamma$                 | 73.62, CH              | 3.65, m                                      | 78.02, CH              | 4.84, m                                      | 70.69, CH              | 4.02, m                                      |
| $\delta$                 | 64.18, CH <sub>2</sub> | 3.55, dd 11.4, 5.2<br>3.49, m <sup>b</sup>   | 60.53, CH <sub>2</sub> | 3.86, dd 12.2, 3.9<br>3.78, dd 12.2, 7.6     | 66.61, CH <sub>2</sub> | 4.41, m <sup>b</sup><br>4.09, dd 11.5, 4.5   |
| <b>Leu<sub>2</sub></b>   |                        |                                              |                        |                                              |                        |                                              |
| NH                       |                        |                                              |                        |                                              |                        |                                              |
| C=O                      | 175.37, C              |                                              | 175.95, C              |                                              | 176.10, C              |                                              |
| $\alpha$                 | 48.93, CH              | 5.11, m <sup>b</sup>                         | 49.57, CH              | 5.02, m <sup>b</sup>                         | 49.07, CH              | 5.05, m <sup>b</sup>                         |
| $\beta$                  | 41.92, CH <sub>2</sub> | 1.90, m<br>1.30, m                           | 42.56, CH <sub>2</sub> | 1.64, m<br>1.46, m                           | 42.63, CH <sub>2</sub> | 1.60, m<br>1.49, m                           |
| $\gamma$                 | 25.63, CH              | 1.74, m                                      | 25.92, CH              | 1.75, m                                      | 26.05, CH              | 1.68, m                                      |
| $\delta$                 | 23.65, CH <sub>3</sub> | 0.93, m <sup>b</sup>                         | 24.11, CH <sub>3</sub> | 0.94, m <sup>b</sup>                         | 23.63, CH <sub>3</sub> | 0.93, m <sup>b</sup>                         |
| $\delta'$                | 21.79, CH <sub>3</sub> | 0.96, m <sup>b</sup>                         | 22.28, CH <sub>3</sub> | 0.96, m <sup>b</sup>                         | 22.36, CH <sub>3</sub> | 0.96, m <sup>b</sup>                         |
| <b>MeThr<sub>3</sub></b> |                        |                                              |                        |                                              |                        |                                              |
| N-CH <sub>3</sub>        | 31.37, CH <sub>3</sub> | 3.28, s                                      | 31.71, CH <sub>3</sub> | 3.32, s                                      | 32.37, CH <sub>3</sub> | 3.39, s                                      |
| C=O                      | 171.51, C              |                                              | 171.61, C              |                                              | 171.69, C              |                                              |
| $\alpha$                 | 62.91, CH              | 5.45, d 9.9                                  | 63.55, CH              | 5.45, d 9.7                                  | 62.91, CH              | 5.57, d 9.1                                  |
| $\beta$                  | 64.94, CH              | 4.10, m                                      | 65.27, CH              | 4.08, m                                      | 65.98, CH              | 4.07, m                                      |
| $\gamma$                 | 20.50, CH <sub>3</sub> | 1.02, d 6.2                                  | 20.28, CH <sub>3</sub> | 1.03, d 6.3                                  | 20.05, CH <sub>3</sub> | 1.01, d 6.2                                  |
| <b>Val<sub>4</sub></b>   |                        |                                              |                        |                                              |                        |                                              |
| NH                       |                        |                                              |                        |                                              |                        |                                              |
| C=O                      | 173.48, C              |                                              | 173.38, C              |                                              | 173.52, C              |                                              |
| $\alpha$                 | 54.91, CH              | 4.66, d 7.8                                  | 54.81, CH              | 4.67, d 7.3                                  | 54.84, CH              | 4.67, d 7.6                                  |
| $\beta$                  | 32.51, CH              | 2.01, m                                      | 32.63, CH              | 2.01, m                                      | 32.51, CH              | 2.01, m                                      |
| $\gamma$                 | 20.23, CH <sub>3</sub> | 0.90, m <sup>b</sup>                         | 20.22, CH <sub>3</sub> | 0.90, m <sup>b</sup>                         | 20.24, CH <sub>3</sub> | 0.92, m <sup>b</sup>                         |
| $\gamma'$                | 18.75, CH <sub>3</sub> | 0.91, m <sup>b</sup>                         | 18.37, CH <sub>3</sub> | 0.91, m <sup>b</sup>                         | 18.55, CH <sub>3</sub> | 0.91, m <sup>b</sup>                         |
| <b>MePhe<sub>5</sub></b> |                        |                                              |                        |                                              |                        |                                              |
| N-CH <sub>3</sub>        | 40.34, CH <sub>3</sub> | 2.85, s                                      | 40.31, CH <sub>3</sub> | 2.84, s                                      | 40.39, CH <sub>3</sub> | 2.84, s                                      |
| C=O                      | 172.52, C              |                                              | 172.54, C              |                                              | 172.54, C              |                                              |
| $\alpha$                 | 68.74, CH              | 4.02, m <sup>b</sup>                         | 71.06, CH              | 4.04, m <sup>b</sup>                         | 68.69, CH              | 4.04, m <sup>b</sup>                         |
| $\beta$                  | 35.41, CH <sub>2</sub> | 3.48, m <sup>b</sup><br>3.21, dd 13.4, 11.0  | 35.39, CH <sub>2</sub> | 3.47, m <sup>b</sup><br>3.22, dd 13.8, 11.2  | 35.38, CH <sub>2</sub> | 3.47, m <sup>b</sup><br>3.22, dd 13.8, 11.0  |
| 1'                       | 139.70, C              |                                              | 139.67, C              |                                              | 139.64, C              |                                              |
| 2'                       | 130.50, CH             | 7.25, m <sup>b</sup>                         | 130.49, CH             | 7.25, m <sup>b</sup>                         | 130.50, CH             | 7.25, m <sup>b</sup>                         |
| 3'                       | 129.67, CH             | 7.30, m <sup>b</sup>                         | 129.67, CH             | 7.30, m <sup>b</sup>                         | 129.67, CH             | 7.30, m <sup>b</sup>                         |
| 4'                       | 127.82, CH             | 7.23, m <sup>b</sup>                         | 127.84, CH             | 7.23, m <sup>b</sup>                         | 127.84, CH             | 7.23, m <sup>b</sup>                         |
| 5'                       | 129.67, CH             | 7.30, m <sup>b</sup>                         | 129.67, CH             | 7.30, m <sup>b</sup>                         | 129.67, CH             | 7.30, m <sup>b</sup>                         |
| 6'                       | 130.50, CH             | 7.25, m <sup>b</sup>                         | 130.50, CH             | 7.25, m <sup>b</sup>                         | 130.50, CH             | 7.25, m <sup>b</sup>                         |
| <b>Gly<sub>6</sub></b>   |                        |                                              |                        |                                              |                        |                                              |
| NH                       |                        |                                              |                        |                                              |                        |                                              |
| C=O                      | 171.18, C              |                                              | 171.16, C              |                                              | 171.20, C              |                                              |
| $\alpha$                 | 44.21, CH <sub>2</sub> | 4.05, m <sup>b</sup><br>3.44, m <sup>b</sup> | 44.24, CH <sub>2</sub> | 4.02, m <sup>b</sup><br>3.48, m <sup>b</sup> | 44.15, CH <sub>2</sub> | 4.03, m <sup>b</sup><br>3.48, m <sup>b</sup> |
| <b>Ile<sub>7</sub></b>   |                        |                                              |                        |                                              |                        |                                              |
| NH                       |                        |                                              |                        |                                              |                        |                                              |
| C=O                      | 173.32, C              |                                              | 173.06, C              |                                              | 173.37, C              |                                              |
| $\alpha$                 | 58.03, CH              | 4.49, d 8.0                                  | 58.19, CH              | 4.46, d 8.3                                  | 58.19, CH              | 4.42, m <sup>b</sup>                         |
| $\beta$                  | 39.27, CH              | 2.08, m                                      | 39.04, CH              | 2.03, m                                      | 38.60, CH              | 2.08, m                                      |
| $\gamma$                 | 25.62, CH <sub>2</sub> | 1.65, m                                      | 25.65, CH <sub>2</sub> | 1.67, m                                      | 25.76, CH <sub>2</sub> | 1.67, m                                      |

|                           |                        |                      |                        |                      |                        |                      |
|---------------------------|------------------------|----------------------|------------------------|----------------------|------------------------|----------------------|
|                           |                        | 1.32, m              |                        | 1.28, m              |                        | 1.27, m              |
| $\delta$                  | 11.45, CH <sub>3</sub> | 0.93, m <sup>b</sup> | 11.35, CH <sub>3</sub> | 0.93, m <sup>b</sup> | 11.16, CH <sub>3</sub> | 0.93, m <sup>b</sup> |
| $\gamma'$                 | 16.16, CH <sub>3</sub> | 0.98, m <sup>b</sup> | 15.97, CH <sub>3</sub> | 0.95, m <sup>b</sup> | 15.90, CH <sub>3</sub> | 0.96, m <sup>b</sup> |
| <b>Ser<sub>8</sub></b>    |                        |                      |                        |                      |                        |                      |
| NH                        |                        |                      |                        |                      |                        |                      |
| C=O                       | 172.22, C              |                      | 172.54, C              |                      | 171.99, C              |                      |
| $\alpha$                  | 56.45, CH              | 4.93, t 7.3          | 56.36, CH              | 5.01, m <sup>b</sup> | 56.94, CH              | 4.92, dd 7.9, 5.7    |
| $\beta$                   | 62.32, CH <sub>2</sub> | 3.75, dd 11.1, 7.2   | 62.60, CH <sub>2</sub> | 3.69, dd 11.5, 5.8   | 62.71, CH <sub>2</sub> | 3.66, dd 11.3, 5.7   |
|                           |                        | 3.67, dd 10.3, 7.2   |                        | 3.57, dd 11.4, 7.9   |                        | 3.60, m <sup>b</sup> |
| <b>Leu<sub>9</sub></b>    |                        |                      |                        |                      |                        |                      |
| NH                        |                        |                      |                        |                      |                        |                      |
| C=O                       | 173.94, C              |                      | 175.54, C              |                      | 174.65, C              |                      |
| $\alpha$                  | 48.39, CH              | 5.13, m <sup>b</sup> | 49.39, CH              | 5.17, dd 10.7, 3.1   | 49.57, CH              | 5.06, m <sup>b</sup> |
| $\beta$                   | 43.48, CH <sub>2</sub> | 1.74, m              | 43.53, CH <sub>2</sub> | 1.72, m              | 42.79, CH <sub>2</sub> | 1.72, m              |
|                           |                        | 1.53, m              |                        | 1.49, m              |                        | 1.49, m              |
| $\gamma$                  | 25.82, CH              | 1.63, m              | 25.61, CH              | 1.79, m              | 25.76, CH              | 1.82, m              |
| $\delta$                  | 23.42, CH <sub>3</sub> | 0.96, m <sup>b</sup> | 23.75, CH <sub>3</sub> | 0.94, m <sup>b</sup> | 24.06, CH <sub>3</sub> | 0.93, m <sup>b</sup> |
| $\delta'$                 | 23.17, CH <sub>3</sub> | 0.96, m <sup>b</sup> | 22.13, CH <sub>3</sub> | 0.99, m <sup>b</sup> | 21.79, CH <sub>3</sub> | 0.96, m <sup>b</sup> |
| <b>MeVal<sub>10</sub></b> |                        |                      |                        |                      |                        |                      |
| N-CH <sub>3</sub>         | 40.77, CH <sub>3</sub> | 3.34, s              | 37.80, CH <sub>3</sub> | 3.33, s              | 39.28, CH <sub>3</sub> | 3.29, s              |
| C=O                       | 170.65, C              |                      | 171.39, C              |                      | 171.87, C              |                      |
| $\alpha$                  | 70.77, CH              | 3.51, d 8.2          | 69.08, CH              | 3.74, d 7.4          | 71.18, CH              | 3.59, m <sup>b</sup> |
| $\beta$                   | 30.26, CH              | 2.56, m              | 29.83, CH              | 2.44, m              | 28.79, CH              | 2.61, m              |
| $\gamma$                  | 21.91, CH <sub>3</sub> | 1.16, d 6.2          | 20.90, CH <sub>3</sub> | 1.12, d 6.5          | 21.87, CH <sub>3</sub> | 1.13, d 6.5          |
| $\gamma'$                 | 19.70, CH <sub>3</sub> | 0.94, m <sup>b</sup> | 20.28, CH <sub>3</sub> | 1.02, m <sup>b</sup> | 19.85, CH <sub>3</sub> | 0.92, m <sup>b</sup> |

<sup>a</sup> <sup>1</sup>H and <sup>13</sup>C NMR spectra were recorded at 600 and 150 MHz, respectively; methanol-*d*<sub>4</sub> was used as solvent.

<sup>b</sup> Multiplicity due to overlapping.

**Table S2.2. Compounds 4, 23a, and 23b<sup>a</sup>**

| no.                       | 4                      |                                              | 23a                    |                                            | 23b                    |                                              |
|---------------------------|------------------------|----------------------------------------------|------------------------|--------------------------------------------|------------------------|----------------------------------------------|
|                           | $\delta_C$ , type      | $\delta_H$ , mult. <i>J</i> in Hz            | $\delta_C$ , type      | $\delta_H$ , mult. <i>J</i> in Hz          | $\delta_C$ , type      | $\delta_H$ , mult. <i>J</i> in Hz            |
| <b>Xyl<sub>1</sub></b>    |                        |                                              |                        |                                            |                        |                                              |
| C=O                       | 175.83, C              | -                                            | 174.88, C              | -                                          | 175.18, C              | -                                            |
| $\alpha$                  | 74.09, CH              | 4.05, brs                                    | 73.93, CH              | 4.23, d 2.5                                | 73.94, CH              | 4.25, d 2.6                                  |
| $\beta$                   | 76.54, CH              | 5.14, m <sup>b</sup>                         | 73.09, CH              | 3.89, dd 4.2, 2.5                          | 73.24, CH              | 3.93, d 4.6, 2.6                             |
| $\gamma$                  | 73.54, CH              | 3.71, m                                      | 74.10, CH              | 3.79, m                                    | 74.11, CH              | 3.82, m                                      |
| $\delta$                  | 61.21, CH <sub>2</sub> | 3.74, m <sup>b</sup><br>3.66, m <sup>b</sup> | 63.96, CH <sub>2</sub> | 3.66, dd 11.2, 4.8<br>3.62, m <sup>b</sup> | 63.96, CH <sub>2</sub> | 3.68, m <sup>b</sup><br>3.63, m <sup>b</sup> |
| $\alpha$ -OH              | -                      | 5.92, brs                                    | -                      | -                                          | -                      | -                                            |
| $\beta$ -OH               | -                      | -                                            | -                      | -                                          | -                      | -                                            |
| $\gamma$ -OH              | -                      | 5.16, brs                                    | -                      | -                                          | -                      | -                                            |
| $\delta$ -OH              | -                      | 5.47, t 6.3                                  | -                      | -                                          | -                      | -                                            |
| <b>Leu<sub>2</sub></b>    |                        |                                              |                        |                                            |                        |                                              |
| NH                        | -                      | 7.34, brs                                    | -                      | -                                          | -                      | -                                            |
| C=O                       | 175.50, C              | -                                            | 175.11, C              | -                                          | 176.02, C              | -                                            |
| $\alpha$                  | 51.72, CH              | 4.74, m <sup>b</sup>                         | 49.18, CH              | 5.01, m <sup>b</sup>                       | 48.88, CH              | 5.04, m <sup>b</sup>                         |
| $\beta$                   | 40.18, CH <sub>2</sub> | 1.52, m                                      | 42.65, CH <sub>2</sub> | 1.59, m<br>1.49, m                         | 41.35, CH <sub>2</sub> | 1.75, m<br>1.64, m                           |
| $\gamma$                  | 26.51, CH              | 1.81, m                                      | 25.96, CH              | 1.70, m                                    | 25.96, CH              | 1.75, m                                      |
| $\delta$                  | 23.61, CH <sub>3</sub> | 0.99, d 6.6                                  | 23.75, CH <sub>3</sub> | 0.96, m <sup>b</sup>                       | 23.75, CH <sub>3</sub> | 0.96, m <sup>b</sup>                         |
| $\delta'$                 | 21.06, CH <sub>3</sub> | 1.02, m <sup>b</sup>                         | 22.09, CH <sub>3</sub> | 1.00, d 6.7                                | 22.09, CH <sub>3</sub> | 0.96, m <sup>b</sup>                         |
| <b>MeThr<sub>3</sub></b>  |                        |                                              |                        |                                            |                        |                                              |
| <i>N</i> -CH <sub>3</sub> | 32.39, CH <sub>3</sub> | 3.30, s                                      | 32.43, CH <sub>3</sub> | 3.21, s                                    | 30.15, CH <sub>3</sub> | 2.84, s                                      |
| C=O                       | 171.96, C              | -                                            | 171.61, C              | -                                          | 170.98, C              | -                                            |
| $\alpha$                  | 64.98, CH              | 5.03, m <sup>b</sup>                         | 63.79, CH              | 4.84, m <sup>b</sup>                       | 67.09, CH              | 4.64, m <sup>b</sup>                         |
| $\beta$                   | 65.54, CH              | 4.21, m                                      | 65.46, CH              | 4.21, m                                    | 64.18, CH              | 4.16, m                                      |
| $\gamma$                  | 21.22, CH <sub>3</sub> | 1.19, d 6.2                                  | 20.60, CH <sub>3</sub> | 1.14, d 6.2                                | 21.13, CH <sub>3</sub> | 1.19, d 6.2                                  |
| <b>Ile<sub>4</sub></b>    |                        |                                              |                        |                                            |                        |                                              |
| NH                        | -                      | 8.23, d 9.5                                  | -                      | -                                          | -                      | -                                            |
| C=O                       | 173.57, C              | -                                            | 174.80, C              | -                                          | 174.76, C              | -                                            |
| $\alpha$                  | 54.45, CH              | 4.74, m <sup>b</sup>                         | 54.64, CH              | 4.65, m <sup>b</sup>                       | 54.85, CH              | 4.66, m <sup>b</sup>                         |
| $\beta$                   | 37.46, CH              | 1.82, m                                      | 38.10, CH              | 1.88, m                                    | 37.37, CH              | 2.02, m                                      |
| $\gamma$                  | 24.81, CH <sub>2</sub> | 1.38, m<br>1.05, m                           | 25.96, CH <sub>2</sub> | 1.55, m<br>1.19, m                         | 26.00, CH <sub>2</sub> | 1.54, m<br>1.20, m                           |
| $\delta$                  | 10.79, CH <sub>3</sub> | 0.77, t 7.8                                  | 11.08, CH <sub>3</sub> | 0.89, m <sup>b</sup>                       | 10.73, CH <sub>3</sub> | 0.86, m <sup>b</sup>                         |
| $\gamma'$                 | 15.99, CH <sub>3</sub> | 0.86, m <sup>b</sup>                         | 15.46, CH <sub>3</sub> | 0.88, m <sup>b</sup>                       | 15.28, CH <sub>3</sub> | 0.87, m <sup>b</sup>                         |
| <b>MeVal<sub>5</sub></b>  |                        |                                              |                        |                                            |                        |                                              |
| <i>N</i> -CH <sub>3</sub> | 42.05, CH <sub>3</sub> | 3.37, s                                      | 31.61, CH <sub>3</sub> | 3.21, s                                    | 31.75, CH <sub>3</sub> | 3.24, s                                      |
| C=O                       | 172.01, C              | -                                            | 172.34, C              | -                                          | 172.34, C              | -                                            |
| $\alpha$                  | 75.43, CH              | 3.24, d 11.5                                 | 63.00, CH              | 4.77, m <sup>b</sup>                       | 62.90, CH              | 4.79, m <sup>b</sup>                         |
| $\beta$                   | 27.28, CH              | 2.81, m                                      | 27.89, CH              | 2.21, m                                    | 27.75, CH              | 2.21, m                                      |
| $\gamma$                  | 21.63, CH <sub>3</sub> | 1.09, d 6.1                                  | 22.27, CH <sub>3</sub> | 0.94, m <sup>b</sup>                       | 22.27, CH <sub>3</sub> | 0.94, m <sup>b</sup>                         |
| $\gamma'$                 | 19.64, CH <sub>3</sub> | 0.99, d 6.0                                  | 19.05, CH <sub>3</sub> | 0.80, m <sup>b</sup>                       | 19.05, CH <sub>3</sub> | 0.80, m <sup>b</sup>                         |
| <b>Leu<sub>6</sub></b>    |                        |                                              |                        |                                            |                        |                                              |
| NH                        | -                      | 7.86, d 8.8                                  | -                      | -                                          | -                      | -                                            |
| C=O                       | 174.32, C              | -                                            | 174.93, C              | -                                          | 174.80, C              | -                                            |
| $\alpha$                  | 49.18, CH              | 4.33, m                                      | 50.04, CH              | 4.72, m <sup>b</sup>                       | 49.86, CH              | 4.75, m <sup>b</sup>                         |
| $\beta$                   | 40.61, CH <sub>2</sub> | 1.81, m                                      | 41.14, CH <sub>2</sub> | 1.63, m<br>1.29, m                         | 41.19, CH <sub>2</sub> | 1.62, m<br>1.32, m                           |
| $\gamma$                  | 26.15, CH              | 1.63, m                                      | 26.00, CH              | 1.68, m                                    | 25.96, CH              | 1.62, m                                      |
| $\delta$                  | 23.71, CH <sub>3</sub> | 0.95, d 6.5                                  | 23.60, CH <sub>3</sub> | 0.95, m <sup>b</sup>                       | 23.56, CH <sub>3</sub> | 0.93, m <sup>b</sup>                         |
| $\delta'$                 | 21.06, CH <sub>3</sub> | 0.92, d 6.5                                  | 21.56, CH <sub>3</sub> | 0.92, m <sup>b</sup>                       | 21.50, CH <sub>3</sub> | 0.93, m <sup>b</sup>                         |
| <b>Gln<sub>7</sub>/Me</b> |                        |                                              |                        |                                            |                        |                                              |
| NH/ <i>N</i> -            | -                      | 8.42, d 8.0                                  | 30.66, CH <sub>3</sub> | 3.04, s                                    | 30.83, CH <sub>3</sub> | 3.06, s                                      |

|                          |                        |                      |  |                        |                      |  |                        |
|--------------------------|------------------------|----------------------|--|------------------------|----------------------|--|------------------------|
| CH <sub>3</sub>          |                        |                      |  |                        |                      |  |                        |
| C=O                      | 173.65, C              | -                    |  | 172.50, C              | -                    |  | 171.40, C              |
| α                        | 50.56, CH              | 4.86, m              |  | 54.12, CH              | 5.52, m <sup>b</sup> |  | 54.03, CH              |
| β                        | 28.32, CH <sub>2</sub> | 2.19, m              |  | 25.42, CH <sub>2</sub> | 2.16, m              |  | 25.83, CH <sub>2</sub> |
|                          |                        | 2.00, m              |  |                        | 2.04, m              |  |                        |
| γ                        | 32.07, CH <sub>2</sub> | 2.44, m              |  | 32.03, CH <sub>2</sub> | 2.17, m              |  | 32.10, CH <sub>2</sub> |
| CONH <sub>2</sub>        | 177.51, C              | 7.32, brs            |  | 177.57, C              | -                    |  | 177.72, C              |
|                          |                        | 6.84, brs            |  |                        |                      |  | -                      |
| <b>MeLeu<sub>8</sub></b> |                        |                      |  |                        |                      |  |                        |
| N-CH <sub>3</sub>        | 31.06, CH <sub>3</sub> | 3.05, s              |  | 31.10, CH <sub>3</sub> | 2.95, s              |  | 30.47, CH <sub>3</sub> |
| C=O                      | 172.38                 | -                    |  | 173.37, C              | -                    |  | 172.44, C              |
| α                        | 53.63, CH              | 5.69, brs            |  | 52.94, CH              | 5.50, m <sup>b</sup> |  | 52.87, CH              |
| β                        | 39.22, CH <sub>2</sub> | 2.01, m              |  | 38.52, CH <sub>2</sub> | 1.68, m              |  | 39.33, CH <sub>2</sub> |
|                          |                        | 1.16, m              |  |                        | 1.53, m              |  |                        |
| γ                        | 26.01, CH              | 1.48, m              |  | 26.00, CH              | 1.38, m              |  | 25.50, CH              |
| δ                        | 24.08, CH <sub>3</sub> | 0.87, m <sup>b</sup> |  | 22.71, CH <sub>3</sub> | 0.94, m <sup>b</sup> |  | 22.28, CH <sub>3</sub> |
| δ'                       | 22.90, CH <sub>3</sub> | 0.81, d 6.8          |  | 19.71, CH <sub>3</sub> | 0.94, m <sup>b</sup> |  | 19.82, CH <sub>3</sub> |
| <b>MeVal<sub>9</sub></b> |                        |                      |  |                        |                      |  |                        |
| N-CH <sub>3</sub>        | 31.06, CH <sub>3</sub> | 2.90, s              |  | 32.99, CH <sub>3</sub> | 3.05, s              |  | 30.15, CH <sub>3</sub> |
| C=O                      | 170.62                 | -                    |  | 172.34, C              | -                    |  | 171.50, C              |
| α                        | 63.33, CH              | 4.95, m <sup>b</sup> |  | 64.53, CH              | 4.58, d 2.4          |  | 65.75, CH              |
| β                        | 27.11, CH              | 2.24, m              |  | 28.91, CH              | 2.29, m              |  | 28.58, CH              |
| γ                        | 20.17, CH <sub>3</sub> | 1.04, m <sup>b</sup> |  | 20.45, CH <sub>3</sub> | 1.02, d 6.6          |  | 21.92, CH <sub>3</sub> |
| γ'                       | 18.87, CH <sub>3</sub> | 0.85, m <sup>b</sup> |  | 19.45, CH <sub>3</sub> | 0.85, d 6.6          |  | 19.05, CH <sub>3</sub> |
| OCH <sub>3</sub>         | -                      | -                    |  | 52.39, CH <sub>3</sub> | 3.70, s              |  | 53.05, CH <sub>3</sub> |

<sup>a</sup> <sup>1</sup>H and <sup>13</sup>C NMR spectra were recorded at 600 and 150 MHz, respectively; CD<sub>3</sub>OH was used as solvent

for **4**, and methanol-*d*<sub>4</sub> was used as solvent for **23a** and **23b**.

<sup>b</sup> Multiplicity due to overlapping.

Table S2.3. Compounds 5–7<sup>a</sup>

| no.                                    | 5                      |                                              | 6                      |                                              | 7                      |                                              |
|----------------------------------------|------------------------|----------------------------------------------|------------------------|----------------------------------------------|------------------------|----------------------------------------------|
|                                        | $\delta_C$ , type      | $\delta_H$ , mult. <i>J</i> in Hz            | $\delta_C$ , type      | $\delta_H$ , mult. <i>J</i> in Hz            | $\delta_C$ , type      | $\delta_H$ , mult. <i>J</i> in Hz            |
| <b>Xyl<sub>1</sub></b>                 |                        |                                              |                        |                                              |                        |                                              |
| C=O                                    | 167.44, C              | -                                            | 167.48, C              | -                                            | 167.49, C              | -                                            |
| $\alpha$                               | 74.72, CH              | 5.01, brs                                    | 74.85, CH              | 4.99, brs                                    | 74.75, CH              | 5.01, brs                                    |
| $\beta$                                | 70.96, CH              | 3.89, m <sup>b</sup>                         | 71.07, CH              | 3.88, brs                                    | 70.93, CH              | 3.89, m <sup>b</sup>                         |
| $\gamma$                               | 72.23, CH              | 3.47, m                                      | 72.21, CH              | 3.46, m                                      | 72.26, CH              | 3.47, m                                      |
| $\delta$                               | 62.62, CH <sub>2</sub> | 3.38, m <sup>b</sup><br>3.24, m <sup>b</sup> | 62.64, CH <sub>2</sub> | 3.37, m <sup>b</sup><br>3.24, m <sup>b</sup> | 62.62, CH <sub>2</sub> | 3.38, m <sup>b</sup><br>3.24, m <sup>b</sup> |
| <b>Leu<sub>2</sub></b>                 |                        |                                              |                        |                                              |                        |                                              |
| NH                                     | -                      | 7.56, d 9.4                                  | -                      | 7.58, d 9.5                                  | -                      | 7.55, d 9.4                                  |
| C=O                                    | 172.75, C              | -                                            | 172.78, C              | -                                            | 172.72, C              | -                                            |
| $\alpha$                               | 46.47, CH              | 5.01, m <sup>b</sup>                         | 46.34, CH              | 5.03, m <sup>b</sup>                         | 46.43, CH              | 5.02, m <sup>b</sup>                         |
| $\beta$                                | 40.96, CH <sub>2</sub> | 1.65, m<br>1.17, m                           | 41.17, CH <sub>2</sub> | 1.62, m<br>1.22, m                           | 41.08, CH <sub>2</sub> | 1.70, m<br>1.14, m                           |
| $\gamma$                               | 24.04, CH              | 1.61, m                                      | 23.70, CH              | 1.58, m                                      | 23.66, CH              | 1.61, m                                      |
| $\delta$                               | 23.18, CH <sub>3</sub> | 0.83, m <sup>b</sup>                         | 23.15, CH <sub>3</sub> | 0.82, m <sup>b</sup>                         | 23.27, CH <sub>3</sub> | 0.84, m <sup>b</sup>                         |
| $\delta'$                              | 21.34, CH <sub>3</sub> | 0.87, m <sup>b</sup>                         | 21.57, CH <sub>3</sub> | 0.86, m <sup>b</sup>                         | 21.27, CH <sub>3</sub> | 0.88, m <sup>b</sup>                         |
| <b>MeThr<sub>3</sub></b>               |                        |                                              |                        |                                              |                        |                                              |
| <i>N</i> -CH <sub>3</sub>              | 30.57, CH <sub>3</sub> | 3.16, s                                      | 30.61, CH <sub>3</sub> | 3.16, s                                      | 30.46, CH <sub>3</sub> | 3.14, s                                      |
| C=O                                    | 168.74, C              | -                                            | 168.87, C              | -                                            | 168.69, C              | -                                            |
| $\alpha$                               | 61.66, CH              | 5.09, m <sup>b</sup>                         | 61.56, CH              | 5.14, d, 10.0                                | 61.47, CH              | 5.11, d 10.0                                 |
| $\beta$                                | 62.96, CH              | 3.90, m                                      | 63.00, CH              | 3.89, m                                      | 62.85, CH              | 3.90, m                                      |
| $\gamma$                               | 20.40, CH <sub>3</sub> | 0.90, m <sup>b</sup>                         | 20.20, CH <sub>3</sub> | 0.88, m <sup>b</sup>                         | 20.28, CH <sub>3</sub> | 0.88, m <sup>b</sup>                         |
| <b>Val<sub>4</sub>/Ile<sub>4</sub></b> |                        |                                              |                        |                                              |                        |                                              |
| NH                                     | -                      | 8.74, d 9.4                                  | -                      | 8.70, d 9.4                                  | -                      | 8.68, d 9.6                                  |
| C=O                                    | 171.48, C              | -                                            | 171.40, C              | -                                            | 171.65, C              | -                                            |
| $\alpha$                               | 52.81, CH              | 4.50, m <sup>b</sup>                         | 52.73, CH              | 4.51, m <sup>b</sup>                         | 51.37, CH              | 4.60, m <sup>b</sup>                         |
| $\beta$                                | 30.64, CH              | 1.89, m                                      | 30.61, CH              | 1.86, m                                      | 36.41, CH              | 1.72, m                                      |
| $\gamma$                               | 19.40, CH <sub>3</sub> | 0.78, m <sup>b</sup>                         | 19.48, CH <sub>3</sub> | 0.76, m <sup>b</sup>                         | 23.27, CH <sub>2</sub> | 1.39, m<br>1.00, m                           |
| $\delta$                               | -                      | -                                            | -                      | -                                            | 10.00, CH <sub>3</sub> | 0.71, m <sup>b</sup>                         |
| $\gamma'$                              | 17.52, CH <sub>3</sub> | 0.73, d 6.2                                  | 17.32, CH <sub>3</sub> | 0.75, m <sup>b</sup>                         | 15.28, CH <sub>3</sub> | 0.73, m <sup>b</sup>                         |
| <b>MePhe<sub>5</sub></b>               |                        |                                              |                        |                                              |                        |                                              |
| <i>N</i> -CH <sub>3</sub>              | 39.44, CH <sub>3</sub> | 2.77, s                                      | 39.35, CH <sub>3</sub> | 2.75, s                                      | 39.58, CH <sub>3</sub> | 2.81, s                                      |
| C=O                                    | 169.77, C              | -                                            | 169.85, C              | -                                            | 169.90, C              | -                                            |
| $\alpha$                               | 66.60, CH              | 3.93, m <sup>b</sup>                         | 66.56, CH              | 3.93, m <sup>b</sup>                         | 66.61, CH              | 3.96, m <sup>b</sup>                         |
| $\beta$                                | 33.96, CH <sub>2</sub> | 3.38, m <sup>b</sup><br>3.01, m <sup>b</sup> | 33.97, CH <sub>2</sub> | 3.36, m <sup>b</sup><br>3.01, m <sup>b</sup> | 33.98, CH <sub>2</sub> | 3.38, m <sup>b</sup><br>3.01, m <sup>b</sup> |
| 1'                                     | 138.91, C              | -                                            | 138.92, C              | -                                            | 138.95, C              | -                                            |
| 2'                                     | 128.23, CH             | 7.27, m <sup>b</sup>                         | 128.24, CH             | 7.27, m <sup>b</sup>                         | 128.23, CH             | 7.27, m <sup>b</sup>                         |
| 3'                                     | 129.20, CH             | 7.24, m <sup>b</sup>                         | 129.22, CH             | 7.21, m <sup>b</sup>                         | 129.23, CH             | 7.24, m <sup>b</sup>                         |
| 4'                                     | 126.29, CH             | 7.21, m <sup>b</sup>                         | 126.30, CH             | 7.21, m <sup>b</sup>                         | 126.27, CH             | 7.21, m <sup>b</sup>                         |
| 5'                                     | 129.20, CH             | 7.24, m <sup>b</sup>                         | 129.22, CH             | 7.21, m <sup>b</sup>                         | 129.23, CH             | 7.24, m <sup>b</sup>                         |
| 6'                                     | 128.23, CH             | 7.27, m <sup>b</sup>                         | 128.24, CH             | 7.27, m <sup>b</sup>                         | 128.23, CH             | 7.27, m <sup>b</sup>                         |
| <b>Gly<sub>6</sub></b>                 |                        |                                              |                        |                                              |                        |                                              |
| NH                                     | -                      | 7.77, t 5.8                                  | -                      | 7.85, m                                      | -                      | 7.83, t 5.4                                  |
| C=O                                    | 167.63, C              | -                                            | 167.67, C              | -                                            | 167.59, C              | -                                            |
| $\alpha$                               | 43.05, CH <sub>2</sub> | 3.79, m <sup>b</sup><br>3.19, m <sup>b</sup> | 43.04, CH <sub>2</sub> | 3.78, dd 16.5, 5.5<br>3.17, m <sup>b</sup>   | 43.09, CH <sub>2</sub> | 3.77, dd 17.0, 5.3<br>3.16, m <sup>b</sup>   |
| <b>Ile<sub>7</sub></b>                 |                        |                                              |                        |                                              |                        |                                              |
| NH                                     | -                      | 7.45, d 9.8                                  | -                      | 7.47, d 9.7                                  | -                      | 7.42, d 9.9                                  |
| C=O                                    | 171.69, C              | -                                            | 171.49, C              | -                                            | 171.46, C              | -                                            |
| $\alpha$                               | 54.97, CH              | 4.47, m <sup>b</sup>                         | 55.09, CH              | 4.48, m <sup>b</sup>                         | 54.94, CH              | 4.47, m <sup>b</sup>                         |
| $\beta$                                | 36.98, CH              | 1.82, m                                      | 37.71, CH              | 1.81, m                                      | 37.54, CH              | 1.82, m                                      |
| $\gamma$                               | 23.89, CH <sub>2</sub> | 1.49, m                                      | 23.66, CH <sub>2</sub> | 1.51, m                                      | 23.74, CH <sub>2</sub> | 1.49, m                                      |

|                                        |                        |                      |                        |                      |                        |                      |
|----------------------------------------|------------------------|----------------------|------------------------|----------------------|------------------------|----------------------|
|                                        |                        |                      |                        | 1.16, m              |                        | 1.18, m              |
| $\delta$                               | 10.61, CH <sub>3</sub> | 0.78, m <sup>b</sup> | 10.77, CH <sub>3</sub> | 0.78, m <sup>b</sup> | 10.56, CH <sub>3</sub> | 0.77, m <sup>b</sup> |
| $\gamma'$                              | 15.04, CH <sub>3</sub> | 0.82, m <sup>b</sup> | 14.99, CH <sub>3</sub> | 0.82, m <sup>b</sup> | 15.02, CH <sub>3</sub> | 0.81, m <sup>b</sup> |
| <b>Ser<sub>8</sub></b>                 |                        |                      |                        |                      |                        |                      |
| NH                                     | -                      | 8.56, d 7.2          | -                      | 8.60, d 7.5          | -                      | 8.58, d 7.3          |
| C=O                                    | 169.87, C              | -                    | 169.80, C              | -                    | 169.85, C              | -                    |
| $\alpha$                               | 51.20, CH              | 4.68, m <sup>b</sup> | 55.16, CH              | 4.79, m <sup>b</sup> | 55.37, CH              | 4.72, m <sup>b</sup> |
| $\beta$                                | 60.46, CH <sub>2</sub> | 3.57, m <sup>b</sup> | 60.48, CH <sub>2</sub> | 3.56, m <sup>b</sup> | 60.40, CH <sub>2</sub> | 3.56, m <sup>b</sup> |
|                                        |                        | 3.49, m <sup>b</sup> |                        | 3.46, m <sup>b</sup> |                        | 3.48, m <sup>b</sup> |
| <b>Val<sub>9</sub>/Ile<sub>9</sub></b> |                        |                      |                        |                      |                        |                      |
| NH                                     | -                      | 8.91, d 9.5          | -                      | 8.85, d 9.4          | -                      | 8.94, d 9.7          |
| C=O                                    | 171.48, C              | -                    | 171.67, C              | -                    | 171.65, C              | -                    |
| $\alpha$                               | 53.25, CH              | 4.55, m <sup>b</sup> | 51.67, CH              | 4.65, m <sup>b</sup> | 53.24, CH              | 4.56, m <sup>b</sup> |
| $\beta$                                | 31.01, CH              | 2.03, m              | 37.16, CH              | 1.84, m              | 31.01, CH              | 2.02, m              |
| $\gamma$                               | 18.96, CH <sub>3</sub> | 0.81, m <sup>b</sup> | 23.62, CH <sub>2</sub> | 1.54, m              | 18.98, CH <sub>3</sub> | 0.80, m <sup>b</sup> |
|                                        |                        |                      |                        | 1.03, m              |                        |                      |
| $\delta$                               |                        |                      | 10.62, CH <sub>3</sub> | 0.77, m <sup>b</sup> | -                      | -                    |
| $\gamma'$                              | 18.18, CH <sub>3</sub> | 0.84, m <sup>b</sup> | 14.76, CH <sub>3</sub> | 0.77, m <sup>b</sup> | 18.09, CH <sub>3</sub> | 0.84, d 6.4          |
| <b>MeAla<sub>10</sub></b>              |                        |                      |                        |                      |                        |                      |
| N-CH <sub>3</sub>                      | 37.33, CH <sub>3</sub> | 3.19, s              | 37.48, CH <sub>3</sub> | 3.20, s              | 37.33, CH <sub>3</sub> | 3.19, s              |
| C=O                                    | 170.17, C              | -                    | 170.17, C              | -                    | 170.19, C              | -                    |
| $\alpha$                               | 58.55, CH              | 3.91, m              | 58.59, CH              | 3.91, m <sup>b</sup> | 58.56, CH              | 3.91, m <sup>b</sup> |
| $\beta$                                | 13.53, CH <sub>3</sub> | 1.33, d 6.2          | 13.44, CH <sub>3</sub> | 1.33, d 6.3          | 13.53, CH <sub>3</sub> | 1.33, d 6.2          |

<sup>a</sup> <sup>1</sup>H and <sup>13</sup>C NMR spectra were recorded at 600 and 150 MHz, respectively; DMSO-*d*<sub>6</sub> was used as solvent.

<sup>b</sup> Multiplicity due to overlapping.

Table S2.4. Compounds 8–10<sup>a</sup>

| no.                                    | 8                      |                                              | 9                      |                                              | 10                     |                                              |
|----------------------------------------|------------------------|----------------------------------------------|------------------------|----------------------------------------------|------------------------|----------------------------------------------|
|                                        | $\delta_C$ , type      | $\delta_H$ , mult. <i>J</i> in Hz            | $\delta_C$ , type      | $\delta_H$ , mult. <i>J</i> in Hz            | $\delta_C$ , type      | $\delta_H$ , mult. <i>J</i> in Hz            |
| <b>Xyl<sub>1</sub></b>                 |                        |                                              |                        |                                              |                        |                                              |
| C=O                                    | 167.48, C              | -                                            | 171.44, C              | -                                            | 171.57, C              | -                                            |
| $\alpha$                               | 74.91, CH              | 4.98, brs                                    | 70.78, CH              | 3.87, brs                                    | 70.69, CH              | 3.89, m <sup>b</sup>                         |
| $\beta$                                | 71.09, CH              | 3.89, brs                                    | 72.69, CH              | 3.68, brs                                    | 72.77, CH              | 3.68, m <sup>b</sup>                         |
| $\gamma$                               | 72.19, CH              | 3.47, m                                      | 69.77, CH              | 3.74, m                                      | 69.77, CH              | 3.76, m                                      |
| $\delta$                               | 62.65, CH <sub>2</sub> | 3.38, m <sup>b</sup><br>3.24, m <sup>b</sup> | 64.77, CH <sub>2</sub> | 4.55, m <sup>b</sup><br>3.75, m <sup>b</sup> | 64.75, CH <sub>2</sub> | 4.58, m <sup>b</sup><br>3.76, m <sup>b</sup> |
| <b>Leu<sub>2</sub></b>                 |                        |                                              |                        |                                              |                        |                                              |
| NH                                     | -                      | 7.61, d 8.7                                  | -                      | 7.74, d 8.8                                  | -                      | 7.74, d 8.8                                  |
| C=O                                    | 172.71, C              | -                                            | 173.60, C              | -                                            | 173.62, C              | -                                            |
| $\alpha$                               | 46.36, CH              | 5.03, m <sup>b</sup>                         | 46.49, CH              | 5.06, m <sup>b</sup>                         | 46.50, CH              | 5.07, m <sup>b</sup>                         |
| $\beta$                                | 41.30, CH <sub>2</sub> | 1.67, m<br>1.21, m                           | 41.44, CH <sub>2</sub> | 1.45, m<br>1.28, m                           | 41.41, CH <sub>2</sub> | 1.50, m<br>1.30, m                           |
| $\gamma$                               | 23.66, CH              | 1.61, m                                      | 24.02, CH              | 1.59, m                                      | 23.67, CH              | 1.61, m                                      |
| $\delta$                               | 23.27, CH <sub>3</sub> | 0.84, m <sup>b</sup>                         | 23.06, CH <sub>3</sub> | 0.81, m <sup>b</sup>                         | 21.72, CH <sub>3</sub> | 0.86, m <sup>b</sup>                         |
| $\delta'$                              | 20.10, CH <sub>3</sub> | 0.88, m <sup>b</sup>                         | 21.70, CH <sub>3</sub> | 0.83, m <sup>b</sup>                         | 21.34, CH <sub>3</sub> | 0.86, m <sup>b</sup>                         |
| <b>MeThr<sub>3</sub></b>               |                        |                                              |                        |                                              |                        |                                              |
| <i>N</i> -CH <sub>3</sub>              | 30.46, CH <sub>3</sub> | 3.15, s                                      | 31.13, CH <sub>3</sub> | 3.24, s                                      | 31.07, CH <sub>3</sub> | 3.25, s                                      |
| C=O                                    | 168.55, C              | -                                            | 168.93, C              | -                                            | 168.74, C              | -                                            |
| $\alpha$                               | 61.38, CH              | 5.16, d 9.7                                  | 60.99, CH              | 5.31, d 9.0                                  | 60.84, CH              | 5.34, d 9.2                                  |
| $\beta$                                | 62.88, CH              | 3.90, m                                      | 63.57, CH              | 3.86, m                                      | 63.55, CH              | 3.86, m                                      |
| $\gamma$                               | 21.51, CH <sub>3</sub> | 0.88, m <sup>b</sup>                         | 19.90, CH <sub>3</sub> | 0.86, m <sup>b</sup>                         | 19.76, CH <sub>3</sub> | 0.88, d 6.3                                  |
| <b>Val<sub>4</sub>/Ile<sub>4</sub></b> |                        |                                              |                        |                                              |                        |                                              |
| NH                                     | -                      | 8.64, d 9.1                                  | -                      | 8.53, d 9.3                                  | -                      | 8.48, d 9.4                                  |
| C=O                                    | 171.51, C              | -                                            | 171.53, C              | -                                            | 171.53, C              | -                                            |
| $\alpha$                               | 51.37, CH              | 4.60, t 8.1                                  | 52.41, CH              | 4.58, m <sup>b</sup>                         | 55.38, CH              | 4.69, m <sup>b</sup>                         |
| $\beta$                                | 36.54, CH              | 1.70, m                                      | 30.77, CH              | 1.77, m                                      | 36.75, CH              | 1.61, m                                      |
| $\gamma$                               | 23.18, CH <sub>2</sub> | 1.40, m<br>1.01, m                           | 19.41, CH <sub>3</sub> | 0.76, m <sup>b</sup>                         | 23.08, CH              | 1.42, m<br>1.02, m                           |
| $\delta$                               | 10.68, CH <sub>3</sub> | 0.79, m <sup>b</sup>                         | -                      | -                                            | 10.55, CH <sub>3</sub> | 0.74, m <sup>b</sup>                         |
| $\gamma'$                              | 15.40, CH <sub>3</sub> | 0.73, m <sup>b</sup>                         | 17.21, CH <sub>3</sub> | 0.76, m <sup>b</sup>                         | 15.33, CH <sub>3</sub> | 0.75, m <sup>b</sup>                         |
| <b>MePhe<sub>5</sub></b>               |                        |                                              |                        |                                              |                        |                                              |
| <i>N</i> -CH <sub>3</sub>              | 39.53, CH <sub>3</sub> | 2.79, s                                      | 39.33, CH <sub>3</sub> | 2.74, s                                      | 39.44, CH <sub>3</sub> | 2.78, s                                      |
| C=O                                    | 169.86, C              | -                                            | 169.71, C              | -                                            | 169.62, C              | -                                            |
| $\alpha$                               | 66.61, CH              | 3.96, m <sup>b</sup>                         | 66.39, CH              | 3.97, m <sup>b</sup>                         | 66.41, CH              | 4.01, m <sup>b</sup>                         |
| $\beta$                                | 62.65, CH <sub>2</sub> | 3.38, m <sup>b</sup><br>3.24, m <sup>b</sup> | 33.98, CH <sub>2</sub> | 3.38, m <sup>b</sup><br>3.01, m <sup>b</sup> | 33.96, CH <sub>2</sub> | 3.38, m <sup>b</sup><br>3.01, m <sup>b</sup> |
| 1'                                     | 138.95, C              | -                                            | 138.87, C              | -                                            | 138.87, C              | -                                            |
| 2'                                     | 128.23, CH             | 7.27, m <sup>b</sup>                         | 128.23, CH             | 7.27, m <sup>b</sup>                         | 128.23, CH             | 7.27, m <sup>b</sup>                         |
| 3'                                     | 129.23, CH             | 7.24, m <sup>b</sup>                         | 129.20, CH             | 7.24, m <sup>b</sup>                         | 129.20, CH             | 7.24, m <sup>b</sup>                         |
| 4'                                     | 126.27, CH             | 7.21, m <sup>b</sup>                         | 126.29, CH             | 7.21, m <sup>b</sup>                         | 126.29, CH             | 7.21, m <sup>b</sup>                         |
| 5'                                     | 129.23, CH             | 7.24, m <sup>b</sup>                         | 129.20, CH             | 7.24, m <sup>b</sup>                         | 129.20, CH             | 7.24, m <sup>b</sup>                         |
| 6'                                     | 128.23, CH             | 7.27, m <sup>b</sup>                         | 128.23, CH             | 7.27, m <sup>b</sup>                         | 128.23, CH             | 7.27, m <sup>b</sup>                         |
| <b>Gly<sub>6</sub></b>                 |                        |                                              |                        |                                              |                        |                                              |
| NH                                     | -                      | 7.88, brs                                    | -                      | 7.98, brs                                    | -                      | 8.02, t 5.5                                  |
| C=O                                    | 167.63, C              | -                                            | 167.70, C              | -                                            | 167.68, C              | -                                            |
| $\alpha$                               | 43.12, CH <sub>2</sub> | 3.77, dd 16.8, 4.8<br>3.16, m <sup>b</sup>   | 43.03, CH <sub>2</sub> | 3.77, m <sup>b</sup><br>3.19, m <sup>b</sup> | 43.05, CH <sub>2</sub> | 3.77, m <sup>b</sup><br>3.19, m <sup>b</sup> |
| <b>Ile<sub>7</sub></b>                 |                        |                                              |                        |                                              |                        |                                              |
| NH                                     | -                      | 7.45, d 9.8                                  | -                      | 7.52, d 9.5                                  | -                      | 7.52, d 9.7                                  |
| C=O                                    | 171.45, C              | -                                            | 171.66, C              | -                                            | 171.69, C              | -                                            |
| $\alpha$                               | 55.11, CH              | 4.47, m <sup>b</sup>                         | 55.24, CH              | 4.43, m <sup>b</sup>                         | 55.26, CH              | 4.44, m <sup>b</sup>                         |
| $\beta$                                | 37.62, CH              | 1.80, m                                      | 37.35, CH              | 1.80, m                                      | 37.56, CH              | 1.82, m                                      |
| $\gamma$                               | 23.74, CH <sub>2</sub> | 1.51, m                                      | 23.87, CH <sub>2</sub> | 1.50, m                                      | 23.74, CH <sub>2</sub> | 1.49, m                                      |

|                                        |                        |                      |                        |                      |                        |                      |
|----------------------------------------|------------------------|----------------------|------------------------|----------------------|------------------------|----------------------|
|                                        |                        | 1.16, m              |                        | 1.13, m              |                        | 1.18, m              |
| $\delta$                               | 10.22, CH <sub>3</sub> | 0.72, m <sup>b</sup> | 10.60, CH <sub>3</sub> | 0.77, m <sup>b</sup> | 10.97, CH <sub>3</sub> | 0.78, m <sup>b</sup> |
| $\gamma'$                              | 14.99, CH <sub>3</sub> | 0.83, m <sup>b</sup> | 14.97, CH <sub>3</sub> | 0.81, m <sup>b</sup> | 14.99, CH <sub>3</sub> | 0.82, m <sup>b</sup> |
| <b>Ser<sub>8</sub></b>                 |                        |                      |                        |                      |                        |                      |
| NH                                     | -                      | 8.59, d 7.0          | -                      | 8.62, d 7.5          | -                      | 8.65, d 7.6          |
| C=O                                    | 169.73, C              | -                    | 169.66, C              | -                    | 168.95, C              | -                    |
| $\alpha$                               | 55.10, CH              | 4.85, m <sup>b</sup> | 55.33, CH              | 4.85, m <sup>b</sup> | 55.26, CH              | 4.89, m <sup>b</sup> |
| $\beta$                                | 60.47, CH <sub>2</sub> | 3.56, m <sup>b</sup> | 61.00, CH <sub>2</sub> | 3.44, m <sup>b</sup> | 61.05, CH <sub>2</sub> | 3.46, m <sup>b</sup> |
|                                        |                        | 3.48, m <sup>b</sup> |                        | 3.41, m <sup>b</sup> |                        | 3.42, m <sup>b</sup> |
| <b>Val<sub>9</sub>/Ile<sub>9</sub></b> |                        |                      |                        |                      |                        |                      |
| NH                                     | -                      | 8.85, d 9.1          | -                      | 8.71, d 8.9          | -                      | 8.72, d 8.8          |
| C=O                                    | 171.63, C              | -                    | 171.60, C              | -                    | 171.48, C              | -                    |
| $\alpha$                               | 51.53, CH              | 4.67, t 9.2          | 52.14, CH              | 4.84, m <sup>b</sup> | 51.96, CH              | 4.84, m <sup>b</sup> |
| $\beta$                                | 37.24, CH              | 1.82, m              | 36.98, CH              | 1.80, m              | 37.24, CH              | 1.82, m              |
| $\gamma$                               | 23.71, CH <sub>2</sub> | 1.51, m              | 23.25, CH <sub>2</sub> | 1.33, m              | 23.08, CH <sub>2</sub> | 1.37, m              |
|                                        |                        | 1.05, m              |                        | 1.14, m              |                        | 1.18, m              |
| $\delta$                               | 10.68, CH <sub>3</sub> | 0.79, m <sup>b</sup> | 11.07, CH <sub>3</sub> | 0.73, m <sup>b</sup> | 10.42, CH <sub>3</sub> | 0.74, m <sup>b</sup> |
| $\gamma'$                              | 14.76, CH <sub>3</sub> | 0.78, m <sup>b</sup> | 14.97, CH <sub>3</sub> | 0.81, m <sup>b</sup> | 14.95, CH <sub>3</sub> | 0.85, m <sup>b</sup> |
| <b>MeAla<sub>10</sub></b>              |                        |                      |                        |                      |                        |                      |
| N-CH <sub>3</sub>                      | 37.51, CH <sub>3</sub> | 3.21, s              | 38.11, CH <sub>3</sub> | 3.19, s              | 38.06, CH <sub>3</sub> | 3.21, s              |
| C=O                                    | 170.18, C              | -                    | 169.82, C              | -                    | 169.70, C              | -                    |
| $\alpha$                               | 58.58, CH              | 3.93, m <sup>b</sup> | 58.80, CH              | 3.99, m <sup>b</sup> | 58.77, CH              | 4.02, m <sup>b</sup> |
| $\beta$                                | 13.47, CH <sub>3</sub> | 1.33, d 6.0          | 13.07, CH <sub>3</sub> | 1.36, d 6.3          | 13.10, CH <sub>3</sub> | 1.38, d 6.2          |

<sup>a</sup> <sup>1</sup>H and <sup>13</sup>C NMR spectra were recorded at 600 and 150 MHz, respectively; DMSO-*d*<sub>6</sub> was used as solvent.

<sup>b</sup> Multiplicity due to overlapping.



Table S2.5. Compounds 11 and 12<sup>a</sup>

| no.                       | 11                     |                                              | 12                     |                                   |
|---------------------------|------------------------|----------------------------------------------|------------------------|-----------------------------------|
|                           | $\delta_C$ , type      | $\delta_H$ , mult. <i>J</i> in Hz            | $\delta_C$ , type      | $\delta_H$ , mult. <i>J</i> in Hz |
| <b>Xyl<sub>1</sub></b>    |                        |                                              |                        |                                   |
| C=O                       | 167.66, C              | -                                            | n.a. <sup>b</sup>      | -                                 |
| $\alpha$                  | 75.09, CH              | 4.99, brs                                    | 70.76, CH              | 4.11, brs                         |
| $\beta$                   | 71.14, CH              | 3.87, m <sup>c</sup>                         | 70.39, CH              | 4.09, m <sup>c</sup>              |
| $\gamma$                  | 72.03, CH              | 3.48, m                                      | 76.53, CH              | 5.00, m                           |
| $\delta$                  | 62.75, CH <sub>2</sub> | 3.35, m <sup>c</sup><br>3.28, m <sup>c</sup> | 59.29, CH <sub>2</sub> | 3.58, m <sup>c</sup>              |
| $\alpha$ -OH              | -                      | -                                            | -                      | 5.84, brs                         |
| $\beta$ -OH               | -                      | 4.30, brs                                    | -                      | 5.34, brs                         |
| $\gamma$ -OH              | -                      | 4.69, m <sup>c</sup>                         | -                      | -                                 |
| $\delta$ -OH              | -                      | 4.51, m <sup>c</sup>                         | -                      | 5.00, m <sup>c</sup>              |
| <b>Val<sub>2</sub></b>    |                        |                                              |                        |                                   |
| NH                        | -                      | 7.41, d 9.3                                  | -                      | 7.60, d 9.8                       |
| C=O                       | 172.79, C              | -                                            | 171.65, C              | -                                 |
| $\alpha$                  | 53.20, CH              | 4.80, m <sup>c</sup>                         | 53.20, CH              | 4.75, m <sup>c</sup>              |
| $\beta$                   | 30.93, CH              | 2.10, m                                      | 30.97, CH              | 2.14, m                           |
| $\gamma$                  | 18.40, CH <sub>3</sub> | 0.80, m <sup>c</sup>                         | 18.76, CH <sub>3</sub> | 0.82, m <sup>c</sup>              |
| $\gamma'$                 | 18.05, CH <sub>3</sub> | 0.84, m <sup>c</sup>                         | 18.17, CH <sub>3</sub> | 0.82, m <sup>c</sup>              |
| <b>MeThr<sub>3</sub></b>  |                        |                                              |                        |                                   |
| <i>N</i> -CH <sub>3</sub> | 39.04, CH <sub>3</sub> | 3.25, s                                      | 28.62, CH <sub>3</sub> | 2.67, s                           |
| C=O                       | 168.94, C              | -                                            | n.a. <sup>b</sup>      | -                                 |
| $\alpha$                  | 62.23, CH              | 5.07, m <sup>c</sup>                         | 64.24, CH              | 4.27, m <sup>c</sup>              |
| $\beta$                   | 63.34, CH              | 3.89, m                                      | 62.11, CH              | 4.00, m                           |
| $\gamma$                  | 20.05, CH <sub>3</sub> | 0.84, m <sup>c</sup>                         | 20.27, CH <sub>3</sub> | 1.03, d 6.3                       |
| <b>Ile<sub>4</sub></b>    |                        |                                              |                        |                                   |
| NH                        | -                      | 8.84, d 9.8                                  | -                      | 7.42, d 9.3                       |
| C=O                       | 171.61, C              | -                                            | 172.90, C              | -                                 |
| $\alpha$                  | 52.51, CH              | 4.50, t 9.7                                  | 51.62, CH              | 4.62, m <sup>c</sup>              |
| $\beta$                   | 35.27, CH              | 1.88, m                                      | 34.76, CH              | 1.76, m                           |
| $\gamma$                  | 23.68, CH <sub>2</sub> | 1.42, m<br>1.03, m                           | 23.36, CH <sub>2</sub> | 1.44, m<br>1.04, m                |
| $\delta$                  | 10.51, CH <sub>3</sub> | 0.72, t 7.5                                  | 11.05, CH <sub>3</sub> | 0.75, m <sup>c</sup>              |
| $\gamma'$                 | 15.76, CH <sub>3</sub> | 0.79, m <sup>c</sup>                         | 15.26, CH <sub>3</sub> | 0.84, m <sup>c</sup>              |
| <b>MeVal<sub>5</sub></b>  |                        |                                              |                        |                                   |
| <i>N</i> -CH <sub>3</sub> | 41.12, CH <sub>3</sub> | 3.23, s                                      | 30.11, CH <sub>3</sub> | 3.02, s                           |
| C=O                       | 168.65, C              | -                                            | n.a. <sup>b</sup>      | -                                 |
| $\alpha$                  | 75.33, CH              | 3.20, m <sup>c</sup>                         | 61.17, CH              | 4.83, m <sup>c</sup>              |
| $\beta$                   | 25.68, CH              | 2.84, m                                      | 25.97, CH              | 2.17, m                           |
| $\gamma$                  | 20.45, CH <sub>3</sub> | 0.98, d 6.5                                  | 19.39, CH <sub>3</sub> | 0.82, m <sup>c</sup>              |
| $\gamma'$                 | 18.85, CH <sub>3</sub> | 0.89, m <sup>c</sup>                         | 17.46, CH <sub>3</sub> | 0.65, d 6.4                       |
| <b>Val<sub>6</sub></b>    |                        |                                              |                        |                                   |
| NH                        | -                      | 7.32, d 9.5                                  | -                      | 7.34, d 9.6                       |
| C=O                       | 169.32, C              | -                                            | n.a. <sup>b</sup>      | -                                 |
| $\alpha$                  | 57.13, CH              | 4.30, m <sup>c</sup>                         | 56.26, CH              | 4.52, m <sup>c</sup>              |
| $\beta$                   | 29.78, CH              | 2.45, m                                      | 31.41, CH              | 2.12, m                           |
| $\gamma$                  | 19.74, CH <sub>3</sub> | 0.84, m <sup>c</sup>                         | 19.56, CH <sub>3</sub> | 0.90, m <sup>c</sup>              |
| $\gamma'$                 | 16.85, CH <sub>3</sub> | 0.79, m <sup>c</sup>                         | 17.81, CH <sub>3</sub> | 0.78, m <sup>c</sup>              |
| <b>Ile<sub>7</sub></b>    |                        |                                              |                        |                                   |
| NH                        | -                      | 7.37, d 9.2                                  | -                      | 8.36, d 9.6                       |
| C=O                       | 170.86, C              | -                                            | n.a. <sup>b</sup>      | -                                 |
| $\alpha$                  | 55.33, CH              | 4.70, m <sup>c</sup>                         | 52.56, CH              | 4.81, m <sup>c</sup>              |
| $\beta$                   | 38.35, CH              | 1.70, m                                      | 37.06, CH              | 1.77, m                           |
| $\gamma$                  | 23.93, CH <sub>2</sub> | 1.49, m<br>1.20, m                           | 24.15, CH <sub>2</sub> | 1.42, m<br>1.03, m                |

|                           |                        |                      |                        |                      |
|---------------------------|------------------------|----------------------|------------------------|----------------------|
| $\delta$                  | 11.18, CH <sub>3</sub> | 0.79, m <sup>c</sup> | 10.99, CH <sub>3</sub> | 0.80, m <sup>c</sup> |
| $\gamma'$                 | 14.88, CH <sub>3</sub> | 0.85, m <sup>c</sup> | 15.21, CH <sub>3</sub> | 0.86, m <sup>c</sup> |
| <b>Ser<sub>8</sub></b>    |                        |                      |                        |                      |
| NH                        | -                      | 8.70, d 8.7          | -                      | 7.78, d 8.0          |
| C=O                       | 169.49, C              | -                    | n.a. <sup>b</sup>      | -                    |
| $\alpha$                  | 54.62, CH              | 5.03, m <sup>c</sup> | 62.30, CH              | 3.99, m <sup>c</sup> |
| $\beta$                   | 61.06, CH <sub>2</sub> | 3.52, m <sup>c</sup> | 60.53, CH <sub>2</sub> | 3.85, m <sup>c</sup> |
|                           |                        | 3.36, m <sup>c</sup> |                        | 3.64, m <sup>c</sup> |
| <b>Ile<sub>9</sub></b>    |                        |                      |                        |                      |
| NH                        | -                      | 8.56, d 9.3          | -                      | 7.58, d 9.6          |
| C=O                       | 172.07, C              | -                    | 170.98, C              | -                    |
| $\alpha$                  | 51.62, CH              | 4.69, m <sup>c</sup> | 52.15, CH              | 4.58, m <sup>c</sup> |
| $\beta$                   | 37.45, CH              | 1.76, m              | 35.18, CH              | 1.76, m              |
| $\gamma$                  | 23.65, CH <sub>2</sub> | 1.42, m              | 23.36, CH <sub>2</sub> | 1.49, m              |
|                           |                        | 1.03, m              |                        | 1.07, m              |
| $\delta$                  | 10.68, CH <sub>3</sub> | 0.76, m <sup>c</sup> | 10.46, CH <sub>3</sub> | 0.73, m <sup>c</sup> |
| $\gamma'$                 | 14.83, CH <sub>3</sub> | 0.76, m <sup>c</sup> | 15.53, CH <sub>3</sub> | 0.82, m <sup>c</sup> |
| <b>MeLeu<sub>10</sub></b> |                        |                      |                        |                      |
| N-CH <sub>3</sub>         | 31.45, CH <sub>3</sub> | 3.26, s              | 30.62, CH <sub>3</sub> | 2.90, s              |
| C=O                       | 170.14, C              | -                    | n.a. <sup>b</sup>      | -                    |
| $\alpha$                  | 61.67, CH              | 3.87, m <sup>c</sup> | 53.37, CH              | 5.57, m <sup>c</sup> |
| $\beta$                   | 37.45, CH <sub>2</sub> | 1.85, m              | 37.14, CH <sub>2</sub> | 1.74, m              |
|                           |                        | 1.70, m              |                        |                      |
| $\gamma$                  | 24.48, CH              | 1.58, m              | 24.45, CH              | 1.50, m              |
| $\delta$                  | 23.33, CH <sub>3</sub> | 0.88, m <sup>c</sup> | 22.09, CH <sub>3</sub> | 0.86, m <sup>c</sup> |
| $\delta'$                 | 21.54, CH <sub>3</sub> | 0.93, d 6.4          | 21.79, CH <sub>3</sub> | 0.90, m <sup>c</sup> |

<sup>a</sup> <sup>1</sup>H and <sup>13</sup>C NMR spectra were recorded at 600 and 150 MHz, respectively; DMSO-*d*<sub>6</sub> was used as solvent.

<sup>b</sup> n.a. not assigned.

<sup>c</sup> Multiplicity due to overlapping.

**Table S3. Genome assembly statistics for *Paramyrothecium* sp. XJ0827**

| <b>Illumina Total Data [Mb]</b> | <b>Expected coverage of the genome</b> | <b>GC %</b> | <b>Q20<sup>a</sup></b> | <b>Q30<sup>a</sup></b> |
|---------------------------------|----------------------------------------|-------------|------------------------|------------------------|
| 5,998                           | 115x                                   | 50.82       | 96.54                  | 90.93                  |

| <b>Nanopore Total Data (Mb)</b> | <b>Expected coverage of the genome</b> | <b>Subreads N50 Length (bp)</b> | <b>Subreads N90 Length (bp)</b> | <b>Subreads Average Length (bp)</b> | <b>Subreads Max Length (bp)</b> | <b>Subreads Min Length (bp)</b> | <b>Subreads GC Content (%)</b> |
|---------------------------------|----------------------------------------|---------------------------------|---------------------------------|-------------------------------------|---------------------------------|---------------------------------|--------------------------------|
| 20,095                          | 388x                                   | 11,574                          | 2,968                           | 7,197.72                            | 170,586                         | 2,000                           | 51.18                          |

| <b>Hybrid Assembly Scaffold Number</b> | <b>Total Length (bp)</b> | <b>N50 Length (bp)</b> | <b>N90 Length (bp)</b> | <b>Max Length (bp)</b> | <b>Min Length (bp)</b> | <b>Gap Number (bp)</b> | <b>GC Content (%)</b> |
|----------------------------------------|--------------------------|------------------------|------------------------|------------------------|------------------------|------------------------|-----------------------|
| 15                                     | 51,769,651               | 4,590,572              | 2,170,085              | 6,525,119              | 54,848                 | 0                      | 51.23                 |

<sup>a</sup> Percent of total data with base calling accuracy quality score of Q20 and Q30 (probability of a call error for each base is less than 1 % and 1 ‰, respectively).

**Table S4. Summary of BGC types in *Paramyrothecium* sp. XJ0827**

| BGC types <sup>a</sup> | Number |
|------------------------|--------|
| PKS                    | 41     |
| NRPS                   | 11     |
| NRPS-like              | 15     |
| PKS-NRPS hybrid        | 15     |
| Terpenoid              | 9      |
| Meroterpenoid          | 2      |
| Others                 | 5      |
| Total                  | 98     |

<sup>a</sup> As defined by antiSMASH 5.0<sup>21</sup>



|            |                                                                                                                                |                                                                   |     |
|------------|--------------------------------------------------------------------------------------------------------------------------------|-------------------------------------------------------------------|-----|
| PxNRPS11.1 | A-T                                                                                                                            | KFH42337 <i>Acremonium chrysogenum</i><br>ATCC 11550 (65 %, 99 %) | 0.0 |
| PxNRPS11.3 | C-A-T - C-A-T - C-A-M-T - C-A-T - C-A-M-T - C-A-T - C-A-M-T - C-A-T - C-A-T - C-A-M-T - C-A-T - C-A-T - C-A-M-T-C <sub>T</sub> | KZL76007 <i>Colletorichum tofieldiae</i> 0861<br>(67 %, 99 %)     | 0.0 |
| PxNRPS11.4 | A-M                                                                                                                            | RYP40686 <i>Monosprascus</i> sp. MG133<br>(68 %, 99 %)            | 0.0 |
| PxNRPS12.4 | A-T                                                                                                                            | AIT18914 <i>Hirsutella thompsonii</i><br>MTCC3556 (41 %, 99 %)    | 0.0 |

<sup>a</sup> A: Adenylation domain; C: condensation domain; C<sub>T</sub>: terminal condensation domain; E: epimerization domain; M: *N*-methylation domain; T: thiolation domain; TD: uncharacterized terminal domain.

**Table S6. Substrate specificity signatures of the A domains of PxXmcG of *Paramyrothecium* sp. XJ0827**

| Module | 34-amino acid and 10-amino acid specificity signature <sup>22-23</sup> | Predicted amino acid / analogue <sup>a</sup> | Amino acid / analogue <sup>a</sup> in xylomyrocins A-C |
|--------|------------------------------------------------------------------------|----------------------------------------------|--------------------------------------------------------|
| 1      | CQFSFGSSLAECTLLSGGEFNYSYGQSESATICS<br>/ GSATLGSTIK                     | Val/Leu/Ile/Abu/Iva                          | Xyl                                                    |
| 2      | LDNSFDASTWETLLLAGGDFNAYGPTENTVISTI<br>/ DAWLLGAVIK                     | Val/Leu/Ile/Abu/Iva                          | Leu                                                    |
| 3      | LNTAFDAATWETMFFASGDINALGHTENTVYSTA<br>/ DAWMFSAVYK                     | Val/Leu/Ile/Abu/Iva                          | Thr                                                    |
| 4      | LSDSFDATTWESFFLIGGDCNAYGPTENTTFSSAL<br>/ DAWFLGATFK                    | Val/Leu/Ile/Abu/Iva                          | Val                                                    |
| 5      | LQSFFDATTLESVFWIGGDYNVYGPTESENSSTF<br>/ DALVWGVNSK                     | Phe/Trp/Phg/Tyr/Bht                          | Phe                                                    |
| 6      | LNSTFDLSTWEAMFLACGEYNTYGPTENSVVSTI<br>/ DLWMLCTVVK                     | Val/Leu/Ile/Abu/Iva                          | Gly                                                    |
| 7      | LQTSFDAATWETFFLAGGEYHVYGPTEENTTFSTL<br>/ DAWFLGVTFK                    | Val/Leu/Ile/Abu/Iva                          | Ile                                                    |
| 8      | LSGSFDNSTWEVMLLAAGDYNAYGPTENTVTSTI<br>/ DNWMLAAVTK                     | Val/Leu/Ile/Abu/Iva                          | Ser                                                    |
| 9      | LSTSFDASTWETFVYSGGDFNLYGPTEENTVVSSC<br>/ DAWFYGLVVK                    | Val/Leu/Ile/Abu/Iva                          | Leu                                                    |
| 10     | LGSSFDASAWAEMLFVAGDYNAYGPTENGLVSTI<br>/ DAWMFAAVLK                     | Val/Leu/Ile/Abu/Iva                          | Val                                                    |

<sup>a</sup> Abu,  $\alpha$ -aminobutyric acid; Bht,  $\beta$ -hydroxytyrosine; Iva, isovaline; Phg: phenylglycine, Xyl: D-xylonic acid

**Table S7. Homologues of PxXmcG-A<sub>1</sub><sup>a</sup> in characterized cyclodepsipeptide synthetases**

| NRPS                    | UniProtKB/Swiss-Prot accession number | Organism                             | Identity | Coverage | E value |
|-------------------------|---------------------------------------|--------------------------------------|----------|----------|---------|
| KK-1 synthetase         | A0A348AXX4                            | <i>Curvularia clavata</i> BAUA-2787  | 54 %     | 100 %    | 0       |
| Enniatin synthetase     | A0A0A1EA36                            | <i>Fusarium oxysporum</i> ETH 1536   | 52 %     | 99 %     | 3E-173  |
| Enniatin synthetase     | Q00869                                | <i>Fusarium equiseti</i>             | 52 %     | 99 %     | 2E-170  |
| Beauvericin synthetase  | S0EN43                                | <i>Fusarium fujikuroi</i> IMI 58289  | 52 %     | 99 %     | 1E-167  |
| Beauvericin synthetase  | G3GBU7                                | <i>Fusarium proliferatum</i> LF061   | 51 %     | 99 %     | 2E-167  |
| Bassianolide synthetase | J5JV76                                | <i>Beauveria bassiana</i> ARSEF 2860 | 50 %     | 99 %     | 8E-163  |
| Bassianolide synthetase | D1FVF0                                | <i>Beauveria bassiana</i> ATCC 7159  | 50 %     | 99 %     | 2E-162  |
| Beauvericin synthetase  | B6D9A8                                | <i>Beauveria bassiana</i> ATCC 7159  | 51 %     | 99 %     | 1E-159  |

<sup>a</sup> PxXmcG-A<sub>1</sub>: the first adenylation domain of PxXmcG of *Paramyrothecium* sp. XJ0827, proposed to be responsible for the activation and loading of D-xylonic acid.



**Table S8. Annotation of the *pxxmc* locus of *Paramyrothecium* sp. XJ0827**

| Protein / GenBank accession number | Protein length (aa) | Functional annotation / Conserved domain                                                                                                                   | Closest GenBank homologue (Identity, Quality cover)                     |
|------------------------------------|---------------------|------------------------------------------------------------------------------------------------------------------------------------------------------------|-------------------------------------------------------------------------|
| PxXmc-3 / OL625655                 | 647                 | Heterokaryon incompatibility protein / pfam06985                                                                                                           | RSL52536 <i>Fusarium</i> sp. AF-8 (52 %, 99 %)                          |
| PxXmc-2 / OL625654                 | 78                  | Hypothetical protein / ND                                                                                                                                  | KAB8252745 <i>Aspergillus flavus</i> (52 %, 97 %)                       |
| PxXmc-1 / OL625653                 | 449                 | Kynurenine or aspartate aminotransferase / cl18945 (Aspartate aminotransferase superfamily)                                                                | RFU73586 <i>Trichoderma arundinaceum</i> (72 %, 99 %)                   |
| PxXmcA / OL625656                  | 647                 | Fungal transcription factor / cd12148 (Middle homology region of fungal transcription factors with GAL4-like C6 zinc binuclear cluster DNA-binding domain) | TEA13464 <i>Colletotrichum sidae</i> CBS 518.97 (56 %, 85 %)            |
| PxXmcB / OL625657                  | 415                 | Hypothetical protein / ND                                                                                                                                  | KPM43911 <i>Neonectria ditissima</i> R09/05 (49 %, 98 %)                |
| PxXmcC / OL625658                  | 587                 | Secreted <sup>a</sup> $\beta$ -1,4-xylosidase / cd18833 (Glycoside hydrolase family 43 protein)                                                            | KAF6823992 <i>Colletotrichum musicola</i> (65 %, 98 %)                  |
| PxXmcD / OL625659                  | 576                 | Secreted <sup>a</sup> GMC oxidoreductase / COG2303 (Choline dehydrogenase or related flavoprotein)                                                         | OTA66111 <i>Hypoxyton</i> sp. EC38 (70 %, 95 %)                         |
| PxXmcE / OL625660                  | 331                 | NAD <sup>+</sup> -dependent oxidoreductase / COG0451 (WcaG nucleoside-diphosphate-sugar epimerase)                                                         | XP_036586351 <i>Colletotrichum truncatum</i> (74 %, 90 %)               |
| PxXmcF / OL625661                  | 1,332               | ABC transporter / COG1132 (ABC-type multidrug transport system)                                                                                            | OHX00951 <i>Colletotrichum incanum</i> (74 %, 100 %)                    |
| PxXmcG / OL625662                  | 12,303              | Nonribosomal peptide synthetase                                                                                                                            | XP_018161716 <i>Colletotrichum higginsianum</i> IMI 349063 (66 %, 99 %) |
| PxXmcH / OL625663                  | 108                 | Hypothetical protein / pfam03647 (Transmembrane protein 14C)                                                                                               | XP_028491477 <i>Verticillium nonalfalfae</i> NRRL 66861 (95 %, 100 %)   |
| PxXmcI / OL625664                  | 113                 | Hypothetical protein / ND                                                                                                                                  | KAB5539334 <i>Coniochaeta</i> sp. 2T2.1 (51 %, 84 %)                    |
| PxXmcJ / OL625665                  | 254                 | Glycoside hydrolase / pfam11790 (Glycosyl hydrolase)                                                                                                       | TRX95652 <i>Xylaria flabelliformis</i> (74 %, 99 %)                     |
| PxXmc+1 / OL625650                 | 645                 | Heterokaryon incompatibility protein / pfam06985                                                                                                           | XP_040789813 <i>Cucurbitaria berberidis</i> CBS 394.84 (30 %, 99 %)     |
| PxXmc+2 / OL625651                 | 383                 | Hypothetical protein / cl21460 (Haloacid dehalogenase-like hydrolases)                                                                                     | KFA64452 <i>Stachybotrys chlorohalonata</i> IBT 40285 (57 %, 71 %)      |
| PxXmc+3 / OL625652                 | 1,220               | Hypothetical protein / ND                                                                                                                                  | RYC57606 <i>Xylaria longipes</i> (44 %, 84 %)                           |

ND: Not detected.

<sup>a</sup> Extracellular localization was predicted with SignalP-5.0 (<http://www.cbs.dtu.dk/services/SignalP/>).

**Table S9. Putative xylose metabolic enzymes in *Paramyothecium* sp. XJ0827 and *P. roridum* NRRL 2183.**

| XJ0827 Protein / GenBank accession number | Protein length (aa) | Closest homologue in NRRL 2183 / GenBank accession number (Identity, Quality cover) | Functional annotation / Conserved domain                                          | Closest GenBank homologue (Identity, Quality cover)                |
|-------------------------------------------|---------------------|-------------------------------------------------------------------------------------|-----------------------------------------------------------------------------------|--------------------------------------------------------------------|
| PxXyd1 <sup>a</sup> / OL625666            | 391                 | PrXyd1 <sup>b</sup> / OL654441 (90 %, 99 %)                                         | NADP:D-xylose dehydrogenase / COG0673 (Predicted MviM dehydrogenase)              | XP_013947251 <i>Trichoderma atroviride</i> IMI 206040 (74 %, 99 %) |
| PxXyd2 <sup>a</sup> / OL625667            | 389                 | PrXyd2 <sup>b</sup> / OL654442 (81 %, 99 %)                                         | NADP:D-xylose dehydrogenase / COG0673 (Predicted MviM dehydrogenase)              | XP_028468087 <i>Sodiomyces alkalinus</i> F11 (56 %, 98 %)          |
| PxXyrA <sup>c</sup> / OL625668            | 323                 | PrXyrA <sup>d</sup> / OL654443 (98 %, 100 %)                                        | NAD(P)H-dependent D-xylose reductase / cd19115 (AKR2D family aldo-keto reductase) | KFH46419 <i>Acremonium chrysogenum</i> ATCC 11550 (89 %, 99 %)     |
| PxUxs1 <sup>e</sup> / OL625649            | 320                 | PrUxs1 / OL654424 (93 %, 99 %)                                                      | UDP-glucuronate decarboxylase / cd05230 (UDP-glucuronate decarboxylase)           | KAG5665494 <i>Fusarium avenaceum</i> (64 %, 97 %)                  |

<sup>a</sup> The *pxxyd1* and *pxxyd2* genes are not part of the *P. sp.* XJ0827 *pxxmc* locus in Scaffold 6. These two genes are located in Scaffold 2 in genomic loci that are ~3.2Mb apart from each other.

<sup>b</sup> The *prxyd1* and *prxyd2* genes are located in contigs PXOD01001614 and PXOD01000303, respectively, and they are not part of the *prxmc* locus of *P. roridum* NRRL 2183 in contigs PXOD01000192 and PXOD01000490.

<sup>c</sup> The *pxxyrA* gene is located in Scaffold 2, and is not a part of the *P. sp.* XJ0827 *pxxmc* locus in Scaffold 6.

<sup>d</sup> The *prxyrA* gene is located in contig PXOD01000131, and is not part of the *prxmc* locus of *P. roridum* NRRL 2183 in contigs PXOD01000192 and PXOD01000490.

<sup>e</sup> The *pxuxs1* gene is located in Scaffold 3, and is not a part of the *P. sp.* XJ0827 *pxxmc* locus in Scaffold 6.

<sup>f</sup> The *pruxs1* gene is located in contig PXOD01000335, and is not part of the *prxmc* locus of *P. roridum* NRRL 2183 in contigs PXOD01000192 and PXOD01000490.

**Table S10. Putative xylan degradation enzymes in *Paramyrothecium* sp. XJ0827**

| GenBank accession number of predicted protein | GenBank homologue | CAZy class | Functional annotation       | Identity (%) | E value |
|-----------------------------------------------|-------------------|------------|-----------------------------|--------------|---------|
| OL654480                                      | ATE54694          | CE1        | acetyl xylan esterase       | 68           | 2E-110  |
| OL654468                                      | CEI70467          | CE2        | acetyl xylan esterase       | 72           | 3E-146  |
| OL654455                                      | CCT67685          | CE3        | acetyl xylan esterase       | 60           | 0       |
| OL654458                                      | VBB73025          | CE3        | acetyl xylan esterase       | 71           | 2E-99   |
| OL654459                                      | CEI63671          | CE3        | acetyl xylan esterase       | 48           | 3E-109  |
| OL654460                                      | CCT73237          | CE3        | acetyl xylan esterase       | 62           | 0       |
| OL654462                                      | ANH22672          | CE3        | acetyl xylan esterase       | 45           | 5.2E-53 |
| OL654471                                      | CCT67685          | CE3        | acetyl xylan esterase       | 60           | 0       |
| OL654473                                      | CCT73237          | CE3        | acetyl xylan esterase       | 59           | 0       |
| OL654476                                      | CEF83009          | CE3        | acetyl xylan esterase       | 62           | 3.1E-80 |
| OL654479                                      | VBB73025          | CE3        | acetyl xylan esterase       | 76           | 4E-132  |
| OL654464                                      | APZ43753          | CE4        | acetyl xylan esterase       | 46           | 5.2E-75 |
| OL654456                                      | AGZ41852          | GH43       | $\beta$ -xylosidase         | 68           | 3E-125  |
| OL654457                                      | ANJ25952          | GH43       | $\beta$ -xylosidase         | 67           | 6E-119  |
| OL654461                                      | SDT24851          | GH43       | $\beta$ -xylosidase         | 52           | 8E-142  |
| OL654463                                      | AGT84551          | GH43       | $\beta$ -xylosidase         | 48           | 1.2E-74 |
| OL654465                                      | ACM26788          | GH43       | $\beta$ -xylosidase         | 59           | 2E-176  |
| OL654467                                      | ADJ45074          | GH43       | $\beta$ -xylosidase         | 52           | 4E-150  |
| OL654469                                      | AFS39313          | GH43       | $\beta$ -xylosidase         | 60           | 6E-111  |
| OL654472                                      | ASB39391          | GH43       | $\beta$ -xylosidase         | 41           | 1.1E-57 |
| OL654474                                      | BAL88020          | GH43       | $\beta$ -xylosidase         | 41           | 7.5E-58 |
| OL654475                                      | ACU35804          | GH43       | $\beta$ -xylosidase         | 56           | 2E-111  |
| OL654478                                      | CCQ33428          | GH43       | $\beta$ -xylosidase         | 40           | 1.1E-61 |
| OL654482                                      | ADJ45712          | GH43       | $\beta$ -xylosidase         | 48           | 4.2E-83 |
| OL654466                                      | AAP57293          | GH10       | endo-1,4- $\beta$ -xylanase | 58           | 7E-107  |
| OL654470                                      | AAC06114          | GH11       | endo- $\beta$ -1,4-xylanase | 47           | 2.2E-48 |
| OL654477                                      | SBT43763          | GH11       | endo- $\beta$ -1,4-xylanase | 42           | 5.5E-45 |
| OL654481                                      | ATB44315          | GH30       | endo- $\beta$ -1,4-xylanase | 47           | 1E-124  |

**Table S11. Fungal BGCs in GenBank and MycoCosm encoding PxXmcG and PxXmcE homologues**

| Strain                                               | PxXmcE homologue                  | PxXmcG homologue                  |
|------------------------------------------------------|-----------------------------------|-----------------------------------|
| <i>Paramyothecium roridum</i> NRRL 2183              | OL654435 <sup>b</sup>             | OL654437 <sup>b</sup>             |
| <i>Colletotrichum cereale</i> CBS 129662             | Colce1/642940 <sup>a</sup>        | Colce1/576756 <sup>a</sup>        |
| <i>Colletotrichum eremochloae</i> CBS 129661         | Coler1/602296 <sup>a</sup>        | Coler1/626878 <sup>a</sup>        |
| <i>Colletotrichum falcatum</i> MAFF 306170           | Colfa1/701189 <sup>a</sup>        | Colfa1/585066 <sup>a</sup>        |
| <i>Colletotrichum graminicola</i> M1.001             | XP_008089346 <sup>b</sup>         | XP_008089345 <sup>b</sup>         |
| <i>Colletotrichum higginsianum</i> IMI 349063        | XP_018161714 <sup>b</sup>         | XP_018161716 <sup>b</sup>         |
| <i>Colletotrichum higginsianum</i> MAFF 305635-RFP   | TID02370 <sup>b</sup>             | AFI23568 <sup>b</sup>             |
| <i>Colletotrichum incanum</i> MAFF 238704            | KZL85774 <sup>b</sup>             | OHX00952 <sup>b</sup>             |
| <i>Colletotrichum navitas</i> CBS 125086             | Colna1/666877 <sup>a</sup>        | Colna1/508102 <sup>a</sup>        |
| <i>Colletotrichum shisoi</i> PG-2018a                | TQN74157 <sup>b</sup>             | TQN74151 <sup>b</sup>             |
| <i>Colletotrichum spaethianum</i> MAFF 239500        | GJC81060 <sup>b</sup>             | GJC81063 <sup>b</sup>             |
| <i>Colletotrichum sublineola</i> TX430BB             | KDN70284 <sup>b</sup>             | KDN70282 <sup>b</sup>             |
| <i>Colletotrichum tanacetii</i> BRIP 57314           | TKW53031 <sup>b</sup>             | TKW53032 <sup>b</sup>             |
| <i>Colletotrichum tofieldiae</i> 0861                | KZL76002 <sup>b</sup>             | KZL76007 <sup>b</sup>             |
| <i>Colletotrichum tofieldiae</i> MAFF 712333         | GKT54243 <sup>b</sup>             | GKT54246 <sup>b</sup>             |
| <i>Colletotrichum truncatum</i> CMES1059             | XP_036579086 <sup>b</sup>         | XP_036579089 <sup>b</sup>         |
| <i>Colletotrichum zoysiae</i> MAFF 235873            | Colzo1/579611 <sup>a</sup>        | Colzo1/501283 <sup>a</sup>        |
| <i>Dactylonectria macroididyma</i> MPI-CAGE-AT-0147  | Dacma1/872502 <sup>a</sup>        | Dacma1/847184 <sup>a</sup>        |
| <i>Dactylonectria estremocensis</i> MPI-CAGE-AT-0021 | Daces1/514266 <sup>a</sup>        | Daces1/514259 <sup>a</sup>        |
| <i>Ilyonectria</i> sp. MPI-CAGE-AT-0134              | Neora1/560831 <sup>a</sup>        | Neora1/633922 <sup>a</sup>        |
| <i>Phaeoacremonium</i> sp. FL0889                    | PhaeoFL0889_1/483306 <sup>a</sup> | PhaeoFL0889_1/517047 <sup>a</sup> |

<sup>a</sup> Assembly/Protein ID in JGI MycoCosm.

<sup>b</sup> GenBank Protein ID.

**Table S12. Potential xylomyrocins-producing fungal strains screened in this study**

| Species                               | Strain     | Species                          | Strain    |
|---------------------------------------|------------|----------------------------------|-----------|
| <i>Colletotrichum acutatum</i>        | ACCC 38933 | <i>Paramyrothecium nigrum</i>    | MN12473   |
| <i>Colletotrichum agaves</i>          | ACCC 30011 | <i>Paramyrothecium roridum</i>   | MN115828  |
| <i>Colletotrichum alatae</i>          | ACCC 39281 | <i>Paramyrothecium roridum</i>   | MN115950  |
| <i>Colletotrichum capsici</i>         | ACCC 36172 | <i>Paramyrothecium roridum</i>   | MN19842   |
| <i>Colletotrichum coccodes</i>        | ACCC 36067 | <i>Paramyrothecium roridum</i>   | MN19843   |
| <i>Colletotrichum dematium</i>        | ACCC 37048 | <i>Paramyrothecium roridum</i>   | MN19850   |
| <i>Colletotrichum frigidum</i>        | ACCC 36179 | <i>Paramyrothecium roridum</i>   | MN19887   |
| <i>Colletotrichum fructicola</i>      | ACCC 39328 | <i>Paramyrothecium roridum</i>   | MN19946   |
| <i>Colletotrichum gloeosporioides</i> | ACCC 31200 | <i>Paramyrothecium roridum</i>   | MN19979   |
| <i>Colletotrichum glycines</i>        | ACCC 36201 | <i>Paramyrothecium roridum</i>   | MN110185  |
| <i>Colletotrichum gossypii</i>        | ACCC 36176 | <i>Paramyrothecium roridum</i>   | MN110364  |
| <i>Colletotrichum graminicola</i>     | ACCC 36361 | <i>Paramyrothecium roridum</i>   | MN111032  |
| <i>Colletotrichum hibisci</i>         | ACCC 30326 | <i>Paramyrothecium roridum</i>   | MN111047  |
| <i>Colletotrichum higginsianum</i>    | ACCC 37053 | <i>Paramyrothecium roridum</i>   | MN113194  |
| <i>Colletotrichum japonicum</i>       | ACCC 36182 | <i>Paramyrothecium roridum</i>   | MN113894  |
| <i>Colletotrichum lagenarium</i>      | ACCC 30016 | <i>Paramyrothecium roridum</i>   | MN113965  |
| <i>Colletotrichum lindemuthianum</i>  | ACCC 36066 | <i>Paramyrothecium roridum</i>   | MN114944  |
| <i>Colletotrichum musae</i>           | ACCC 31244 | <i>Paramyrothecium roridum</i>   | MN115048  |
| <i>Colletotrichum orbiculare</i>      | ACCC 36065 | <i>Paramyrothecium roridum</i>   | MN115132  |
| <i>Colletotrichum panacicola</i>      | ACCC 30017 | <i>Paramyrothecium roridum</i>   | MN115382  |
| <i>Colletotrichum papayae</i>         | ACCC 36363 | <i>Paramyrothecium roridum</i>   | MN115948  |
| <i>Colletotrichum sp.</i>             | XJ1040     | <i>Paramyrothecium roridum</i>   | MN115978  |
| <i>Colletotrichum tabacum</i>         | ACCC 36167 | <i>Paramyrothecium roridum</i>   | MN116117  |
| <i>Colletotrichum trichellum</i>      | ACCC 36404 | <i>Paramyrothecium roridum</i>   | NRRL 2183 |
| <i>Colletotrichum truncatum</i>       | ACCC 36322 | <i>Paramyrothecium tellicola</i> | MN12884   |

ACCC: Agriculture Culture Collection of China (Beijing, China); MN: MoonBiotech (Guangzhou, China).

**Table S13. MALDI-TOF MS data for 10 groups of peptides produced by seven representative *Paramyrothecium* and *Colletotrichum* spp.<sup>a</sup>**

| Strain                                   | Group | MALDI-TOF MS (m/z)                                                                                                                                          |
|------------------------------------------|-------|-------------------------------------------------------------------------------------------------------------------------------------------------------------|
| <i>Paramyrothecium roridum</i> NRRL 2183 | 1     | [M+Na] <sup>+</sup> 858, [M+K] <sup>+</sup> 874<br>[M+Na] <sup>+</sup> 872, [M+K] <sup>+</sup> 888<br>[M+Na] <sup>+</sup> 900, [M+K] <sup>+</sup> 916       |
|                                          | 2     | [M+Na] <sup>+</sup> 1107, [M+K] <sup>+</sup> 1123<br>[M+Na] <sup>+</sup> 1121, [M+K] <sup>+</sup> 1137                                                      |
| <i>Paramyrothecium roridum</i> MN115382  | 3     | [M+Na] <sup>+</sup> 2173<br>[M+Na] <sup>+</sup> 2187<br>[M+Na] <sup>+</sup> 2201                                                                            |
| <i>Paramyrothecium nigrum</i> MN12473    | 4     | [M+Na] <sup>+</sup> 1024, [M+K] <sup>+</sup> 1040<br>[M+Na] <sup>+</sup> 1038, [M+K] <sup>+</sup> 1054<br>[M+Na] <sup>+</sup> 1052, [M+K] <sup>+</sup> 1068 |
|                                          | 5     | [M+Na] <sup>+</sup> 1189<br>[M+Na] <sup>+</sup> 1205<br>[M+Na] <sup>+</sup> 1221<br>[M+Na] <sup>+</sup> 1237                                                |
| <i>Paramyrothecium roridum</i> MN110185  | 6     | [M+Na] <sup>+</sup> 1542, [M+K] <sup>+</sup> 1568                                                                                                           |
| <i>Paramyrothecium roridum</i> MN113194  | 7     | [M+Na] <sup>+</sup> 1115, [M+K] <sup>+</sup> 1131<br>[M+Na] <sup>+</sup> 1129, [M+K] <sup>+</sup> 1145                                                      |
| <i>Paramyrothecium roridum</i> MN19850   | 8     | [M+Na] <sup>+</sup> 1190, [M+K] <sup>+</sup> 1206                                                                                                           |
| <i>Colletotrichum</i> sp. XJ1040         | 9     | [M+Na] <sup>+</sup> 523, [M+K] <sup>+</sup> 539<br>[M+Na] <sup>+</sup> 570, [M+K] <sup>+</sup> 586                                                          |
|                                          | 10    | [M+Na] <sup>+</sup> 1121, [M+K] <sup>+</sup> 1137<br>[M+Na] <sup>+</sup> 1151, [M+K] <sup>+</sup> 1167                                                      |

<sup>a</sup> Peptides subsequently identified as xylomyrocin-type cyclodepsipeptides are shown in red.

**Table S14. Substrate specificity signatures of the A domains of PrXmcG of *Paramyrothecium roridum* NRRL 2183**

| Module | 34-amino acid and 10-amino acid specificity signature <sup>22-23</sup> | Predicted amino acid / analogue <sup>a</sup> | Amino acid / analogue <sup>a</sup> in xylomyrocins A-C |
|--------|------------------------------------------------------------------------|----------------------------------------------|--------------------------------------------------------|
| 1      | CQFSFGSSLAECTLLSGGEINSYGQSESSTICGA<br>/ GSATLGSTIK                     | Val/Leu/Ile/Abu/Iva                          | Xyl                                                    |
| 2      | LQDSFDASIFEFLLVGGDYNAYGPTENTVVSTF<br>/ DAFLVGAVVK                      | Val/Leu/Ile/Abu/Iva                          | Leu                                                    |
| 3      | LNTAFDASTWETMFFASGDINVLGHTENTVYSTA<br>/ DAWMFSVVYK                     | Val/Leu/Ile/Abu/Iva                          | Thr                                                    |
| 4      | LNNSFDATTWESFVLTGGEGHVYGPTEENTTFSTL<br>/ DAWFLGVTFK                    | Val/Leu/Ile/Abu/Iva                          | Ile                                                    |
| 5      | LQSSFDASTWESMLFAAGDYNAYGPTENTVLSTI<br>/ DAWMFAAVLK                     | Val/Leu/Ile/Abu/Iva                          | Val                                                    |
| 6      | LNTSFDAAATWETIFFSGGEYHAYGPEENTTYSTI<br>/ DAWIFGATYK                    | Val/Leu/Ile/Abu/Iva                          | Leu                                                    |
| 7      | THRSFDTSVLENMYLCGGDYNAYGPTENSVNSTI<br>/ DTLMLGSVNK                     | Phe/Trp/Phg/Tyr/Bht                          | Gln                                                    |
| 8      | LSTSFDAAATWEALFYVGGDFNAYGPTENTVMSAI<br>/ DAWLYGAVMK                    | Val/Leu/Ile/Abu/Iva                          | Leu                                                    |
| 9      | LNSSFDASTWEAMIFVAGDYNAYGPTENTVLSTV<br>/ DAWMFAAVLK                     | Val/Leu/Ile/Abu/Iva                          | Val                                                    |

<sup>a</sup> Abu,  $\alpha$ -aminobutyric acid; Bht,  $\beta$ -hydroxytyrosine; Iva, isovaline; Phg: phenylglycine, Xyl: D-xylonic acid

**Table S15. Annotation of the *prxmc* locus of *Paramyothecium roridum* NRRL 2183.**

| Protein / GenBank accession number | Protein length (aa) | Closest homologue in the <i>prxmc</i> locus of <i>P. sp. XJ0827</i> (Identity, Quality cover) <sup>a</sup> | Functional annotation / Conserved domain                                                                                                                   | Closest GenBank homologue (Identity, Quality cover)                 |
|------------------------------------|---------------------|------------------------------------------------------------------------------------------------------------|------------------------------------------------------------------------------------------------------------------------------------------------------------|---------------------------------------------------------------------|
| PrXmc-5 / OL654430                 | >404                | ND <sup>b</sup>                                                                                            | Hypothetical protein / ND                                                                                                                                  | KAF5578726 <i>Fusarium pseudoanthophilum</i> (37 %, 92 %)           |
| PrXmc-4 / OL654429                 | 213                 | ND <sup>b</sup>                                                                                            | Secreted hypothetical protein / cd00118 (LysM peptidoglycan-binding domain)                                                                                | KAB8252745 <i>Fusarium longipes</i> (48 %, 98 %)                    |
| PrXmc-1 / OL654428                 | 449                 | PxXmc-1 (86 %, 99 %)                                                                                       | Kynurenine or aspartate aminotransferase / cl18945 (Aspartate aminotransferase superfamily)                                                                | RFU73586 <i>Trichoderma arundinaceum</i> (72 %, 99 %)               |
| PrXmcA / OL654431                  | 676                 | PxXmcA (69 %, 94 %)                                                                                        | Fungal transcription factor / cd12148 (Middle homology region of fungal transcription factors with GAL4-like C6 zinc binuclear cluster DNA-binding domain) | TEA13464 <i>Colletotrichum sidae</i> CBS 518.97 (54 %, 81 %)        |
| PrXmcX / OL654440                  | 426                 | ND <sup>b</sup>                                                                                            | Hypothetical protein / pfam00646 (F-box domain)                                                                                                            | <i>Monosporascus</i> sp. CRB-8-3 (40 %, 90 %)                       |
| PrXmcB / OL654432                  | 411                 | PxXmcB (81 %, 100 %)                                                                                       | Hypothetical protein / ND                                                                                                                                  | KPM43911 <i>Neonectria ditissima</i> (50 %, 98 %)                   |
| PrXmcC / OL654433                  | 587                 | PxXmcC (91 %, 99 %)                                                                                        | Secreted <sup>c</sup> $\beta$ -1,4-xylosidase / cd18833 (Glycosyl hydrolase family 43 protein)                                                             | KAF6823992 <i>Colletotrichum musicola</i> (69 %, 95 %)              |
| PrXmcD / OL654434                  | 576                 | PxXmcD (83 %, 100 %)                                                                                       | Secreted <sup>c</sup> GMC oxidoreductase / COG2303 (Choline dehydrogenase or related flavoprotein)                                                         | XP_007835811 <i>Pestalotiopsis fici</i> W106-1 (68 %, 98 %)         |
| PrXmcG / OL654437                  | 11,225              | PxXmcG (63 %, 99 %)                                                                                        | Nonribosomal peptide synthetase                                                                                                                            | KZL76007 <i>Colletotrichum tofieldiae</i> (68 %, 99 %)              |
| PrXmcF / OL654436                  | 1,338               | PxXmcF (72 %, 99 %)                                                                                        | ABC transporter / COG1132 (ABC-type multidrug transport system)                                                                                            | KZL76004 <i>Colletotrichum tofieldiae</i> (71 %, 98 %)              |
| PrXmcE / OL654435                  | 324                 | PxXmcE (83 %, 99 %)                                                                                        | NAD <sup>+</sup> -dependent oxidoreductase / COG0451 (WcaG nucleoside-diphosphate-sugar epimerase)                                                         | XP_036586351 <i>Colletotrichum truncatum</i> (74 %, 91 %)           |
| PrXmcH <sup>d</sup> / OL654438     | 108                 | PxXmcH (95 %, 100 %)                                                                                       | Hypothetical protein / pfam03647 (Transmembrane protein 14C)                                                                                               | KAG7111059 <i>Verticillium longisporum</i> NRRL 66861 (95 %, 100 %) |
| PrXmcJ <sup>d</sup> / OL654439     | 254                 | PxXmcJ (91 %, 100 %)                                                                                       | Glycoside hydrolase / pfam11790 (Glycosyl hydrolase)                                                                                                       | OTA95937 <i>Hypoxyylon</i> sp. CO27-5 (78 %, 99 %)                  |
| PrXmc+1 <sup>d</sup> / OL654425    | 645                 | PxXmc+1 (68 %, 100 %)                                                                                      | Heterokaryon incompatibility protein / pfam06985                                                                                                           | PMD24880 <i>Hyaloscypha hepaticicola</i> (30 %, 99 %)               |
| PrXmc+4 <sup>d</sup> / OL654426    | 481                 | ND <sup>b</sup>                                                                                            | Calcium-transporting ATPase 2 / COG0474 (Mg-transporting ATPase)                                                                                           | KUI62530 <i>Valsa mali</i> var. <i>pyri</i> (33 %, 69 %)            |
| PrXmc+5 <sup>d</sup> / OL654427    | 538                 | ND <sup>b</sup>                                                                                            | Hypothetical protein / COG0154 (tRNA amidotransferase-related)                                                                                             | KAG6358477 <i>Diaporthe citri</i> (62 %, 96 %)                      |

<sup>a</sup> Genes for close homologues of PxXmc1 and PxXmc+3 from strain XJ0827 were not detected in the *P. roridum* NRRL 2183 genome assembly (GCA\_003012165). Genes for the homologues of PxXmc+2 and



PxXmc-2 of strain XJ0827 are not part of the *prxmc* locus. Instead, they were detected in two additional contigs (PXOD01000044 and PXOD01000112, respectively) in the *P. roridum* NRRL 2183 genome assembly (GenBank: GCA\_003012165). A gene for a homologue of PxXmc-3 of strain XJ0827 is present in the same contig (PXOD01000192) as the *prxmc-5* – *prxmcE* part of the *prxmc* locus, but it is located ~22kb downstream from *prxmc-5* in *P. roridum* NRRL 2183.

<sup>b</sup> ND: Not detected in the *pxxmc* locus of *P. sp.* XJ0827.

<sup>c</sup> Extracellular localization was predicted with SignalP-5.0: <http://www.cbs.dtu.dk/services/SignalP/>

<sup>d</sup> The *prxmc* locus is located in two contigs (*prxmc-5* to *prxmcE*: PXOD01000192; *prxmcH* to *prxmc+5*: PXOD01000490) in the *P. roridum* NRRL 2183 genome assembly (GenBank: GCA\_003012165).

**Table S16. Minimum inhibitory concentrations (MICs) of xylomyrocin A–C (1–3)**

| Organism                   | Compound (MIC; µg/mL) |     |     |           |                |                             |
|----------------------------|-----------------------|-----|-----|-----------|----------------|-----------------------------|
|                            | 1                     | 2   | 3   | kanamycin | amphotericin B | pneumocandin B <sub>0</sub> |
| <i>S. aureus</i> ATCC 6538 | >20                   | >20 | >20 | 5         | nt             | nt                          |
| MRSA 11646                 | >20                   | >20 | >20 | >20       | nt             | nt                          |
| <i>E. coli</i> ATCC 25922  | >20                   | >20 | >20 | >20       | nt             | nt                          |
| <i>C. albicans</i> SC5314  | >20                   | >20 | >20 | nt        | nt             | 0.2                         |
| <i>C. neoformans</i> H99   | >20                   | >20 | >20 | nt        | 0.2            | nt                          |

nt, Not tested.

**Table S17. PCR primers used in this study**

| Primer name        | Sequence (5'-3')                                     | Notes                                      |
|--------------------|------------------------------------------------------|--------------------------------------------|
| pxxmcC-KO-UA-F     | GTTTTTCAGCAAGATATCCCAGGACGTCGGGTCATCCC               | For gene disruption cassette cloning       |
| pxxmcC-KO-UA-R     | CTTGGTACCGAGCTCCAGGGATGTTCTGCTGATGGGCATTTCATGGAGA    |                                            |
| pxxmcC-KO-DA-F     | ATGGTGGCAGGCCCCCTTGGCCCACAGGAACATAGATTCG             | For gene disruption cassette cloning       |
| pxxmcC-KO-DA-R     | ATCTTCTAGAAAAGATATCGTCTTCTGTCCCCTAAGCTGCTGATGTA      |                                            |
| HygR-F             | GAGCTCGGTACCAAGGCCCGG                                | For gene disruption cassette cloning       |
| HygR-R             | GGGGCCTGCCACCATACCCA                                 |                                            |
| pxxmcC-KO-seg-F    | CCAGGACGTCGGGTCATCCC                                 | For gene disruption cassette amplification |
| pxxmcC-KO-seg-R    | CTTCTGTCCCCTAAGCTGCTGATG                             |                                            |
| pxxmcD-KO-UA-F     | GTTTTTCAGCAAGATATCTTGAAGAAAGTCGAATTGGTCCCG           | For gene disruption cassette cloning       |
| pxxmcD-KO-UA-R     | CTTGGTACCGAGCTCCTCTCTGATGACTGGATCGTCAATG             |                                            |
| pxxmcD-KO-DA-F     | ATGGTGGCAGGCCCCCTCATCTTGTGAAAAGGCGCTTACA             | For gene disruption cassette cloning       |
| pxxmcD-KO-DA-R     | ATCTTCTAGAAAAGATATCACATGACCTGCATGCTGCCAGCTTCTTCTGATT |                                            |
| pxxmcD-KO-seg-F    | TTGAAGAAAGTCGAATTGGTCCCG                             | For gene disruption cassette amplification |
| pxxmcD-KO-seg-R    | ACATGACCCTGCATGCTGCCAGCTTCTTCTGATT                   |                                            |
| pxxmcE-KO-UA-F     | GTTTTTCAGCAAGATATCGAATGAAATCCAAAACACCGAAGT           | For gene disruption cassette cloning       |
| pxxmcE-KO-UA-R     | CTTGGTACCGAGCTCGGACTTGTTGTGGAGTAGCTTAGTGGTT          |                                            |
| pxxmcE-KO-DA-F     | ATGGTGGCAGGCCCCCTTGCCCATAGTGTCAATGTCCCG              | For gene disruption cassette cloning       |
| pxxmcE-KO-DA-R     | ATCTTCTAGAAAAGATATCTTATTGCACTTGTGGTCTTCA             |                                            |
| pxxmcE-KO-seg-F    | GAATGAAATCCAAAACACCGAAGT                             | For gene disruption cassette amplification |
| pxxmcE-KO-seg-R    | TTCATTGCACTTGTGGTCTTCA                               |                                            |
| pxxmcG-KO-UA-F     | GTTTTTCAGCAAGATATCAAGATGAGATACTCAACAAGGCAGCTTT       | For gene disruption cassette cloning       |
| pxxmcG-KO-UA-R     | CTTGGTACCGAGCTCGATTCTCAATCAGTCTGCAGAGTAATGT          |                                            |
| pxxmcG-KO-DA-F     | ATGGTGGCAGGCCCCCTTGATTCCGGTACGCCGTGCCTCTATGCTTTGAGA  | For gene disruption cassette cloning       |
| pxxmcG-KO-DA-R     | ATCTTCTAGAAAAGATATCGTAGACGATGATACGTCATAACACGCA       |                                            |
| pxxmcG-KO-seg-F    | AAGATGAGATACTCAACAAGGCAGCTTT                         | For gene disruption cassette amplification |
| pxxmcG-KO-seg-R    | AGACGATGATACGTCATAACACGCA                            |                                            |
| pxxmcC-KO-verif-p1 | GTCACGAATTCAAATGGGACAACG                             | For gene knockout verification             |
| pxxmcC-KO-verif-p2 | TCTGGGGTATCAATGTGAAGACGAA                            |                                            |
| pxxmcC-KO-verif-p3 | ATACGAGATTCACATGATTGCCAGC                            |                                            |
| pxxmcC-KO-verif-p4 | AAGTGGCTACGAGGCCGCCAAAGACTGGATAGTGAG                 |                                            |
| pxxmcD-KO-verif-p1 | GCCGCAATTGACGAGATCTTT                                | For gene knockout verification             |
| pxxmcD-KO-verif-p2 | TTCAACGGGGTGAGCCCGCTCTTCGCTGGAAATTC                  |                                            |
| pxxmcD-KO-verif-p3 | CGGAGGTTGCTTGAGTGGAATTATC                            |                                            |
| pxxmcD-KO-verif-p4 | TCAAGGTGCCACACGAGACATG                               |                                            |
| pxxmcE-KO-verif-p1 | CCTCGGCGTCTCGTTATCAG                                 | For gene knockout verification             |
| pxxmcE-KO-verif-p2 | TTACGAGCTTGTGGTGACGATGAA                             |                                            |
| pxxmcE-KO-verif-p3 | GCAGTTTCGAATTGCCTGCCGTTTCTCATGGTTCC                  |                                            |
| pxxmcE-KO-verif-p4 | GTACGGTGGCCGTCTTCTTGC                                |                                            |
| pxxmcG-KO-verif-p1 | AGAAGACGCGAATGTAATCTTTGAGG                           | For gene knockout verification             |
| pxxmcG-KO-verif-p2 | TTCTGTACACAACTCTCACTGAACCGT                          |                                            |
| pxxmcG-KO-verif-p3 | TGGGATACAGACACAACCTCCATGT                            |                                            |
| pxxmcG-KO-verif-p4 | AAATGCCAAGCTCCCTGCGC                                 |                                            |
| tubulin-F          | GTCTACAATGGCACCTCCGAG                                | For RT-qPCR analysis                       |
| tubulin-R          | AAGTTGTCGGGACGGAAGAG                                 |                                            |
| pxxyd1-F           | TGAGCATCAAGATCCGAGAGC                                | For RT-qPCR analysis                       |
| pxxyd1-R           | CGTTAAACTGCCATCGTCTGC                                |                                            |
| pxxyd2-F           | ACACCGCACTCGCACCAT                                   | For RT-qPCR analysis                       |

|           |                                                 |                                                                                                               |
|-----------|-------------------------------------------------|---------------------------------------------------------------------------------------------------------------|
| pxxyd2-R  | ATACCTTCTTGTTCAACGGCTG                          |                                                                                                               |
| pxuxs1_F  | GCGAGACTACTTCTAGCGAGC                           | For RT-qPCR analysis                                                                                          |
| pxuxs1_R  | TTGCCTTCGTCGTAGCATGA                            |                                                                                                               |
| pxxyrA_F  | GCCTACCGTCAAGCTCAACA                            | For RT-qPCR analysis                                                                                          |
| pxxyrA_R  | TCACCGCACTCCTTCTCATT                            |                                                                                                               |
| pxxmc-3-F | TGGGCCAGTGGGCTAGAAT                             | For RT-qPCR analysis                                                                                          |
| pxxmc-3-R | ATGTGGGCGCAAGATTGTTT                            |                                                                                                               |
| pxxmc-2-F | CAAGTGCAGCAGAACCGTAG                            | For RT-qPCR analysis                                                                                          |
| pxxmc-2-R | CTATCGCCATACTTTCCACAGAT                         |                                                                                                               |
| pxxmc-1-F | AAGGCAACGTGATCTTGACG                            | For RT-qPCR analysis                                                                                          |
| pxxmc-1-R | CGACCAGCATT CAGAAGCGT                           |                                                                                                               |
| pxxmcA-F  | CCTGCAAGCCGTATCAGCAT                            | For RT-qPCR analysis                                                                                          |
| pxxmcA-R  | TTTTCCAGCGATTGTGGGGT                            |                                                                                                               |
| pxxmcB-F  | ATCGTTTGCACATGCTCC                              | For RT-qPCR analysis                                                                                          |
| pxxmcB-R  | TTTCCATGGCCTGAGGATTG                            |                                                                                                               |
| pxxmcC-F  | AATCTGGGTCCTGGCAGTTTAG                          | For RT-qPCR analysis                                                                                          |
| pxxmcC-R  | CTTGCGTAGCCACATAGACCTT                          |                                                                                                               |
| pxxmcD-F  | GCTGGCTAGAAGGCACAAATC                           | For RT-qPCR analysis                                                                                          |
| pxxmcD-R  | CAGGCGGCTGGAAGTAAAGA                            |                                                                                                               |
| pxxmcE-F  | AAGGTGCCTGTAAGATGGGGT                           | For RT-qPCR analysis                                                                                          |
| pxxmcE-R  | AGAGTCAGTTGGGTTACAGTCGG                         |                                                                                                               |
| pxxmcF-F  | CAACTGTT CAGAATGCCGATGT                         | For RT-qPCR analysis                                                                                          |
| pxxmcF-R  | TCACCTGTCAAGAGCCTGGC                            |                                                                                                               |
| pxxmcG-F  | ATGGTGAATGGATGCTGTTT                            | For RT-qPCR analysis                                                                                          |
| pxxmcG-R  | AAGGCAGTAGTTCTTGAGGCT                           |                                                                                                               |
| pxxmcH-F  | CCGAGCACCCAGCATTCA                              | For RT-qPCR analysis                                                                                          |
| pxxmcH-R  | CGCCGTTGTCCTTGTTCTT                             |                                                                                                               |
| pxxmcl-F  | CAATCCAATTGTGCGAGAGCC                           | For RT-qPCR analysis                                                                                          |
| pxxmcl-R  | CGTTGGATCCATCCATGCTG                            |                                                                                                               |
| pxxmcJ-F  | GCAATGCTGCCATCAGGTATC                           | For RT-qPCR analysis                                                                                          |
| pxxmcJ-R  | GGAAGACAAAACAGACCGTACTCG                        |                                                                                                               |
| pxxmc+1-F | CCCCAATTTGCAAGCACGA                             | For RT-qPCR analysis                                                                                          |
| pxxmc+1-R | GCTTATGGCCTCAGCATCCA                            |                                                                                                               |
| pxxmc+2-F | CGACAAC TTTGACAGCGTCC                           | For RT-qPCR analysis                                                                                          |
| pxxmc+2-R | CAACCGAGCTGACTGTGACT                            |                                                                                                               |
| pxxmc+3-F | CAAGGATGACCTGACGGAAT                            | For RT-qPCR analysis                                                                                          |
| pxxmc+3-R | CTTGAGTGCCGCCTAGGTT                             |                                                                                                               |
| NHisAT-F  | CCGCGCGGCAGCCATATGATCACGGAAGAAGACCGTACG         | For constructions of pET28a-N-His-PxXmcG-A <sub>1</sub> T <sub>1</sub> and pET28a-N-His-PxXmcG-A <sub>1</sub> |
| NHisAT-R  | GGTGGTGGTGCTCGAGTTAGTACGGCTTTGGAGTTATGGTGTGTC   | For construction of pET28a-N-His-PxXmcG-A <sub>1</sub> T <sub>1</sub>                                         |
| NHisA-R   | GGTGGTGGTGCTCGAGTTACTCAAAGAGCTGGCATT TTTGATTATG | For construction of pET28a-N-His-PxXmcG-A <sub>1</sub>                                                        |

|          |                                            |                                                                                                               |
|----------|--------------------------------------------|---------------------------------------------------------------------------------------------------------------|
| CHisAT-F | AGGAGATATACCATGATCACGGAAGAAGACCGTACG       | For constructions of pET28a-C-His-PxXmcG-A <sub>1</sub> T <sub>1</sub> and pET28a-C-His-PxXmcG-A <sub>1</sub> |
| CHisAT-R | GGTGGTGGTGCTCGAGGTACGGCTTTGGAGTTATGGTGTTGC | For constructions of pET28a-C-His-PxXmcG-A <sub>1</sub> T <sub>1</sub>                                        |
| CHisA-R  | GGTGGTGGTGCTCGAGCTCCAAGAGCTGGCATTGATTATG   | For constructions of pET28a-C-His-PxXmcG-A <sub>1</sub>                                                       |

**Table S18. Crystal data and structure refinement of compound 3**

|                                             |                                                                |
|---------------------------------------------|----------------------------------------------------------------|
| Identification code                         | 827_ODS90_4_1B                                                 |
| Empirical formula                           | C <sub>54</sub> H <sub>89</sub> N <sub>9</sub> O <sub>16</sub> |
| Formula weight                              | 1120.34                                                        |
| Temperature/K                               | 100                                                            |
| Crystal system                              | orthorhombic                                                   |
| Space group                                 | P2 <sub>1</sub> 2 <sub>1</sub> 2 <sub>1</sub>                  |
| a/Å                                         | 33.8453(6)                                                     |
| b/Å                                         | 17.7843(3)                                                     |
| c/Å                                         | 10.78100(10)                                                   |
| α/°                                         | 90                                                             |
| β/°                                         | 90                                                             |
| γ/°                                         | 90                                                             |
| Volume/Å <sup>3</sup>                       | 6489.25(17)                                                    |
| Z                                           | 4                                                              |
| ρ <sub>calc</sub> g/cm <sup>3</sup>         | 1.147                                                          |
| μ/mm <sup>-1</sup>                          | 0.699                                                          |
| F(000)                                      | 2416.0                                                         |
| Crystal size/mm <sup>3</sup>                | 0.1 × 0.08 × 0.02                                              |
| Radiation                                   | CuKα (λ = 1.54184)                                             |
| 2θ range fro data collection/°              | 7.21 to 133.186                                                |
| Index ranges                                | -40 ≤ h ≤ 35, -21 ≤ k ≤ 21, -12 ≤ l ≤ 12                       |
| Reflections collected                       | 47100                                                          |
| Independent reflections                     | 11362 [R <sub>int</sub> = 0.0989, R <sub>sigma</sub> = 0.0661] |
| Data/restraints/parameters                  | 11362/0/731                                                    |
| Goodness-of-fit on F <sup>2</sup>           | 1.042                                                          |
| Final R indexes [I ≥ 2σ(I)]                 | R <sub>1</sub> = 0.0756, wR <sub>2</sub> = 0.1989              |
| Final R indexes [all data]                  | R <sub>1</sub> = 0.0816, wR <sub>2</sub> = 0.2034              |
| Largest diff. peak/hole / e Å <sup>-3</sup> | 0.51/-0.32                                                     |
| Flack parameter                             | -0.02(13)                                                      |

### 3. SI Figures

Figure S1. HRESIMS/MS analysis

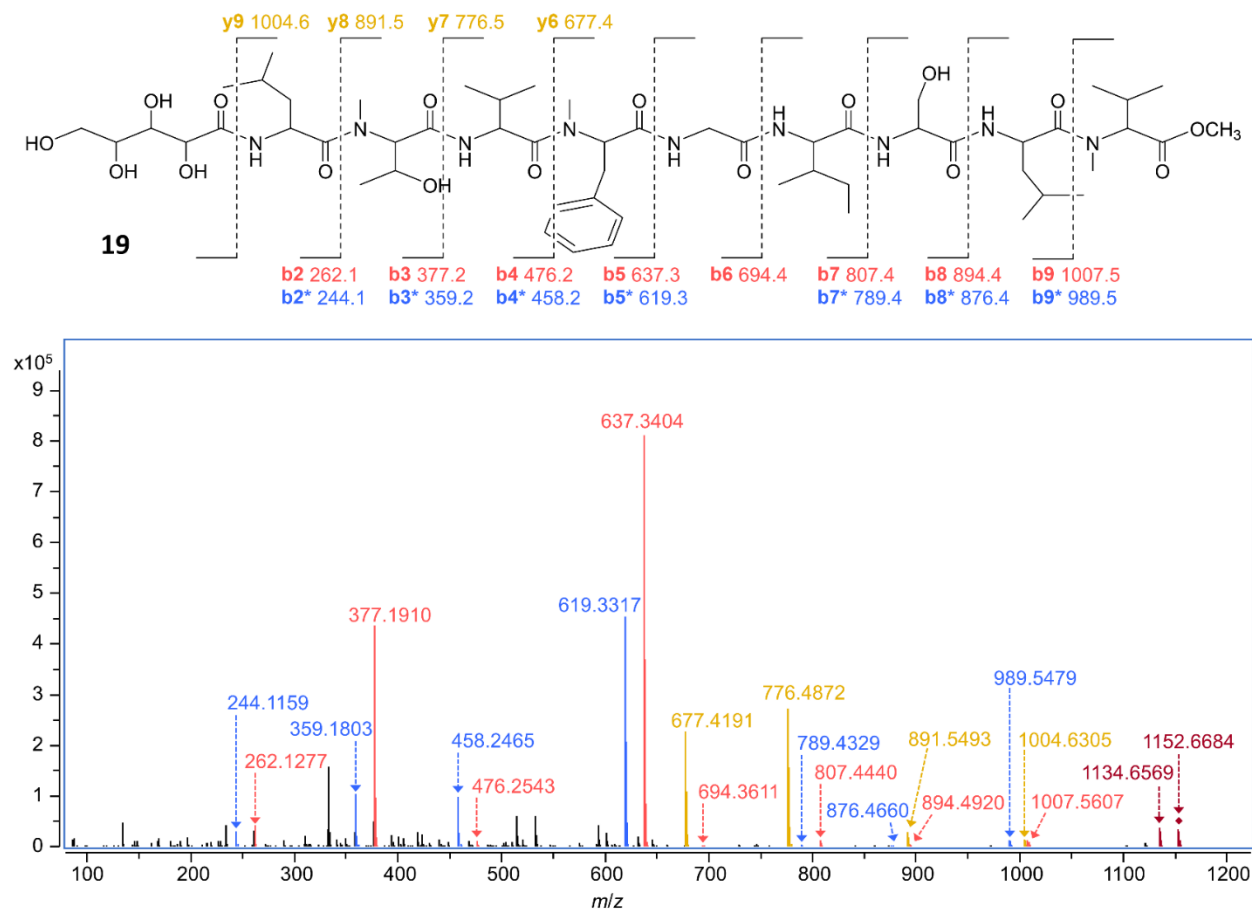

Figure S1.1. Product ion mass spectrum of the  $[M + H]^+$  ion of **19** ( $m/z$  1152.6684).

Compound **3** was first linearized by methanolysis upon treatment with  $\text{CH}_3\text{ONa}/\text{CH}_3\text{OH}$  to afford the methoxy-substituted derivative **19**. Fragment ions of the b-, b-H<sub>2</sub>O (b\*-), and y-type, resulting from collision-induced dissociation of the  $[M + H]^+$  ion of **19**, are shown in red, blue and yellow respectively. The  $[M+H]^+$  and  $[M-H_2O+H]^+$  ions are shown in maroon.

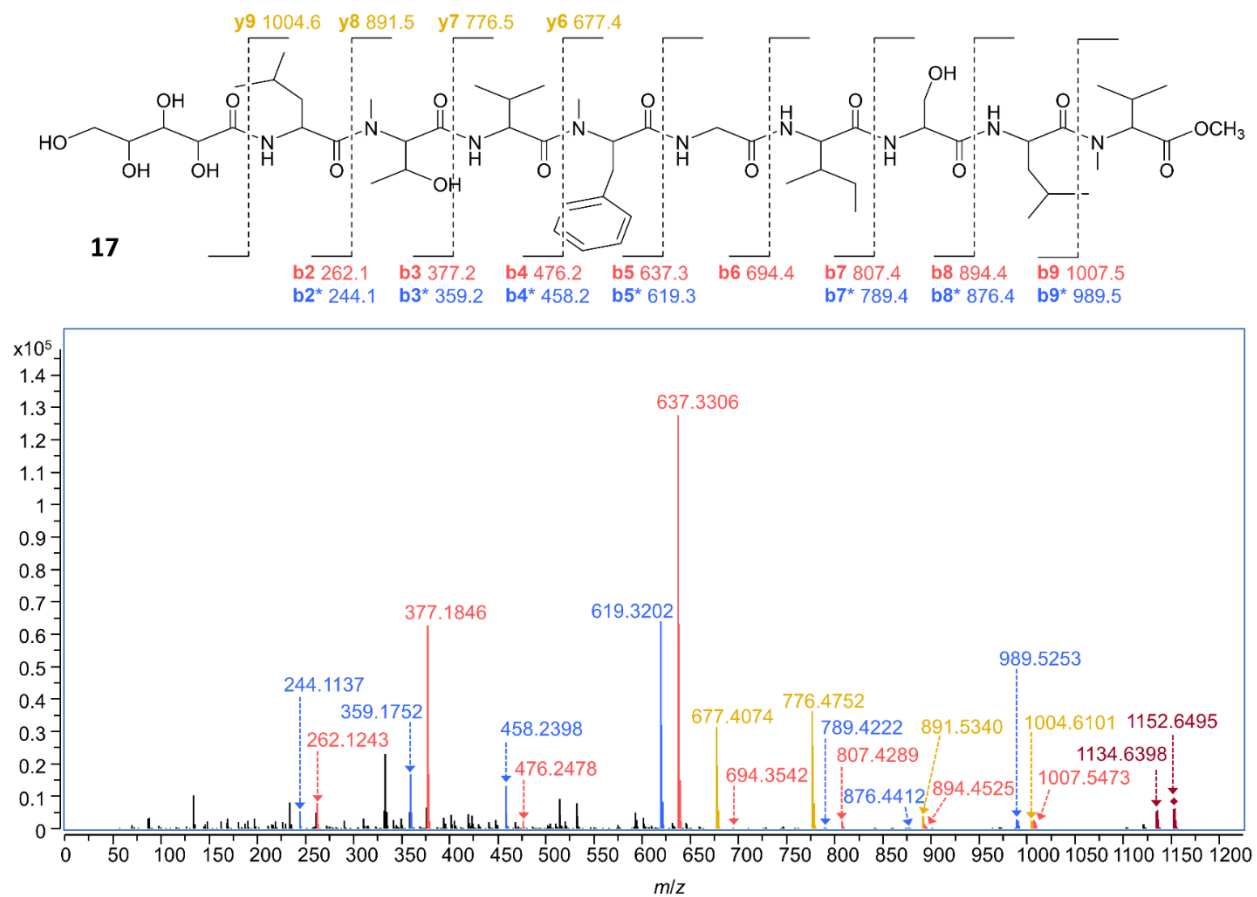

**Figure S1.2. Product ion mass spectrum of the [M + H]<sup>+</sup> ion of **17** (m/z 1152.6495).**

Compound **1** was first linearized by methanolysis upon treatment with CH<sub>3</sub>ONa/CH<sub>3</sub>OH to afford the methoxy-substituted derivative **17**. Fragment ions of the b-, b-H<sub>2</sub>O (b\*-), and y-type, resulting from collision-induced dissociation of the [M + H]<sup>+</sup> ion of **17**, are shown in red, blue and yellow respectively. The [M+H]<sup>+</sup> and [M-H<sub>2</sub>O+H]<sup>+</sup> ions are shown in maroon.



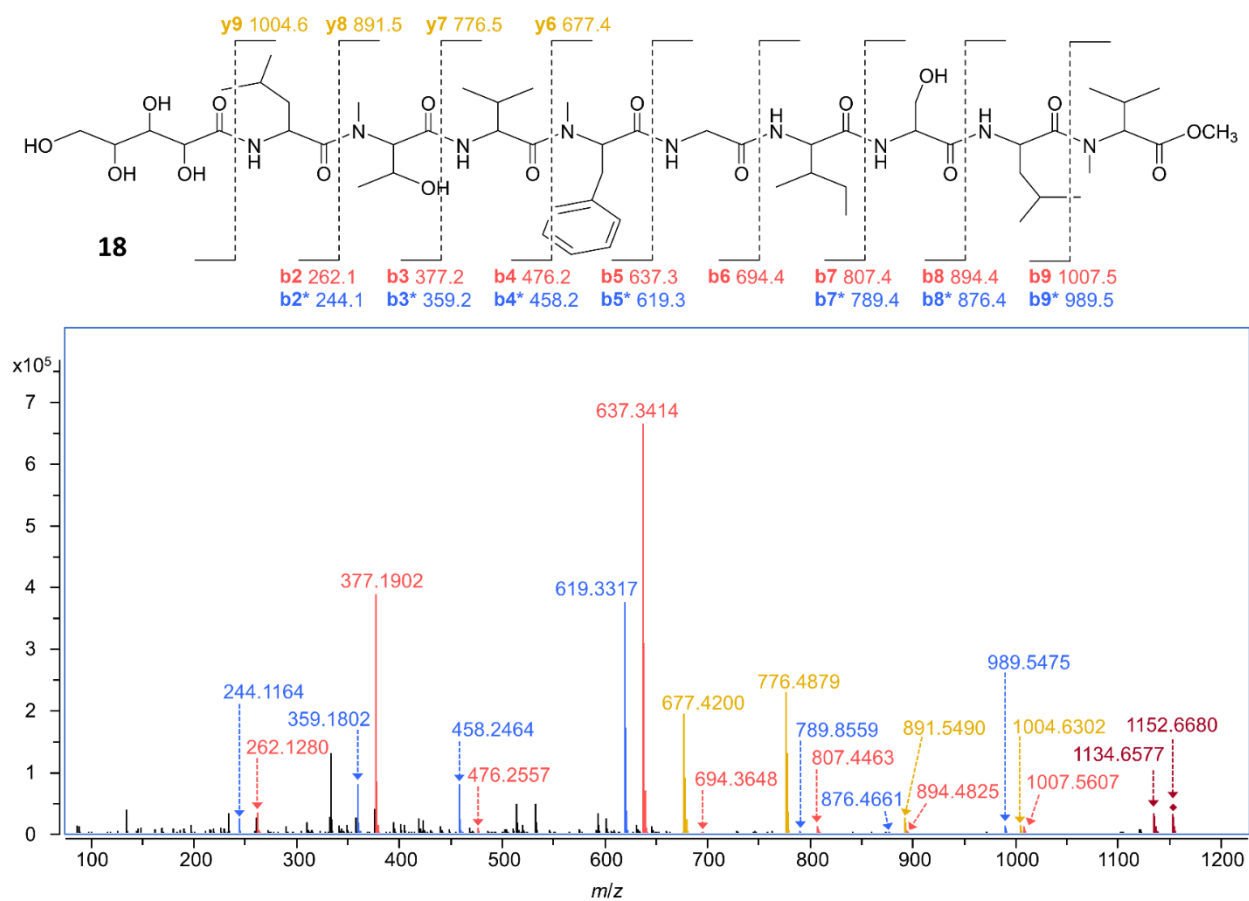

**Figure S1.3. Product ion mass spectrum of the  $[M + H]^+$  ion of **18** ( $m/z$  1152.6680).**

Compound **2** was first linearized by methanolysis upon treatment with  $\text{CH}_3\text{ONa}/\text{CH}_3\text{OH}$  to afford the methoxy-substituted derivative **18**. Fragment ions of the b-, b-H<sub>2</sub>O (b\*-), and y-type, resulting from collision-induced dissociation of the  $[M + H]^+$  ion of **18**, are shown in red, blue and yellow respectively. The  $[M+H]^+$  and  $[M-H_2O+H]^+$  ions are shown in maroon.

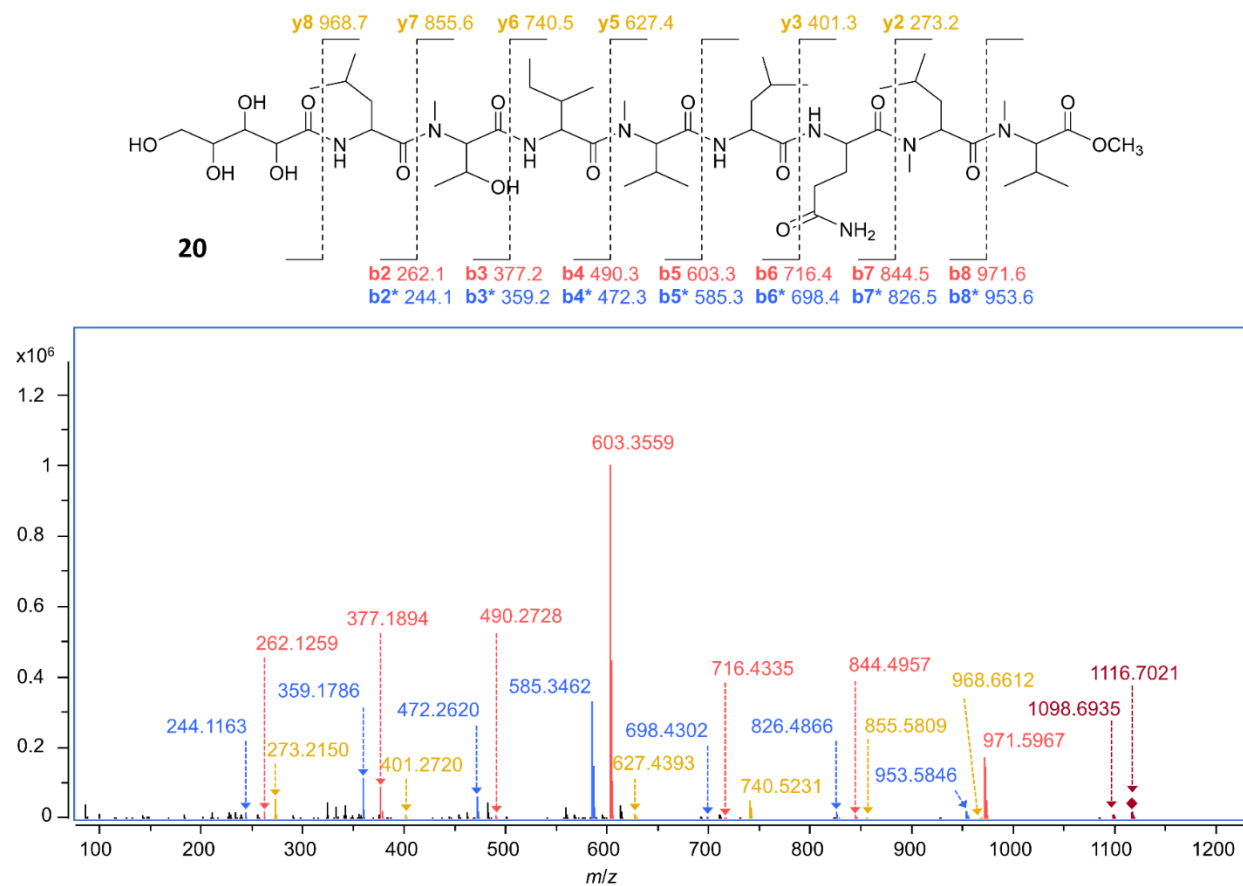

**Figure S1.4. Product ion mass spectrum of the  $[M + H]^+$  ion of **20** ( $m/z$  1116.7021).**

Compound **4** was first linearized by methanolysis upon treatment with  $\text{CH}_3\text{ONa}/\text{CH}_3\text{OH}$  to afford the methoxy-substituted derivative **20**. Fragment ions of the b-, b-H<sub>2</sub>O (b\*-), and y-type, resulting from collision-induced dissociation of the  $[M + H]^+$  ion of **20**, are shown in *red*, *blue* and *yellow* respectively. The  $[M+H]^+$  and  $[M-H_2O+H]^+$  ions are shown in *maroon*.

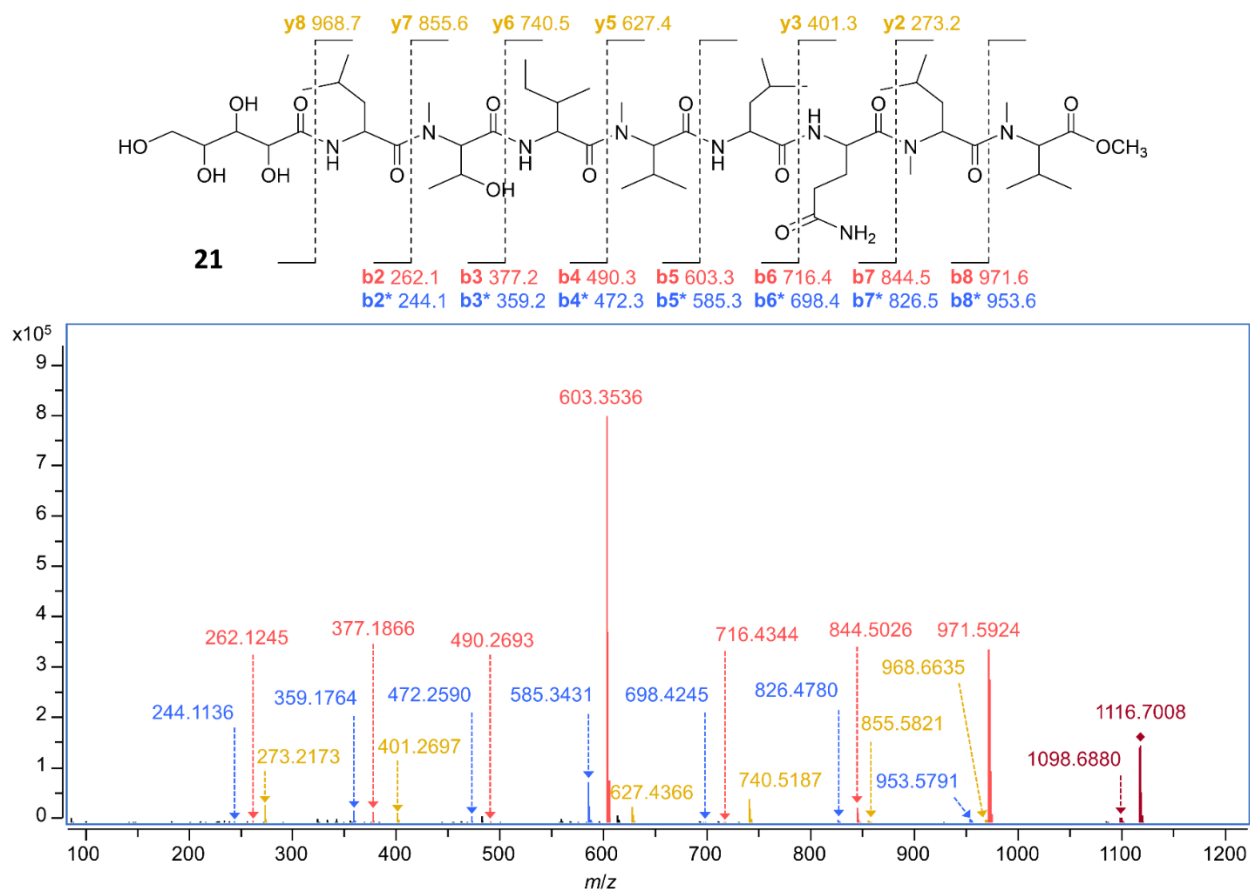

**Figure S1.5. Product ion mass spectrum of the  $[M + H]^+$  ion of **21** ( $m/z$  1116.7008).**

Compound **M1** was first linearized by methanolysis upon treatment with  $\text{CH}_3\text{ONa}/\text{CH}_3\text{OH}$  to afford two methoxy-substituted derivatives **21** and **22**. Fragment ions of the b-, b-H<sub>2</sub>O (b<sup>\*</sup>-), and y-type, resulting from collision-induced dissociation of the  $[M + H]^+$  ion of **21**, are shown in red, blue and yellow respectively. The  $[M+H]^+$  and  $[M-H_2O+H]^+$  ions are shown in maroon.

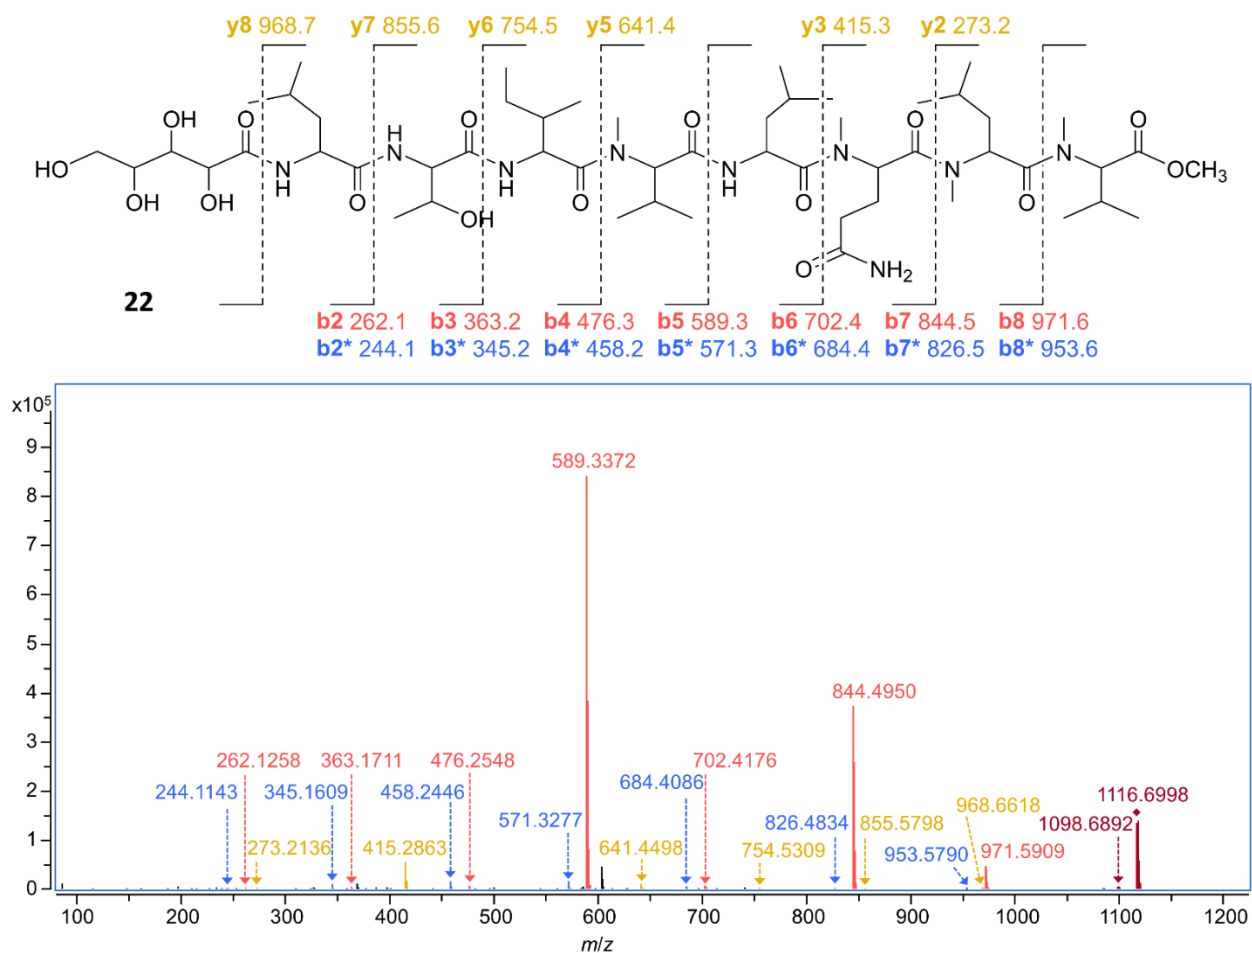

**Figure S1.6. Product ion mass spectrum of the  $[M + H]^+$  ion of **22** ( $m/z$  1116.6998).**

Compound **M1** was first linearized by methanolysis upon treatment with  $\text{CH}_3\text{ONa}/\text{CH}_3\text{OH}$  to afford two methoxy-substituted derivatives **21** and **22**. Fragment ions of the b-, b-H<sub>2</sub>O (b<sup>\*</sup>-), and y-type, resulting from collision-induced dissociation of the  $[M + H]^+$  ion of **22**, are shown in red, blue and yellow respectively. The  $[M+H]^+$  and  $[M-H_2O+H]^+$  ions are shown in maroon.

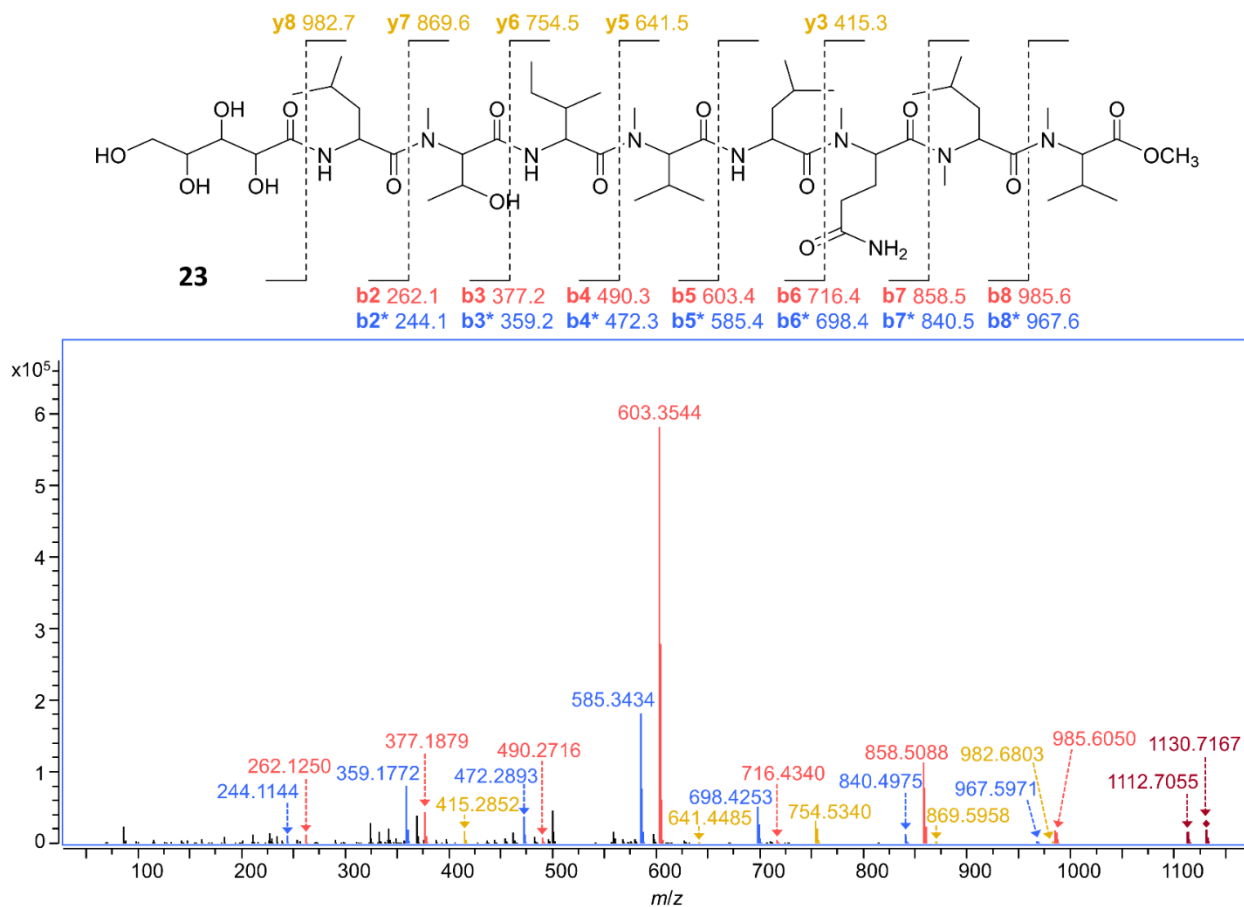

**Figure S1.7. Product ion mass spectrum of the  $[M + H]^+$  ion of **23** ( $m/z$  1130.7167).**

Compound **M2** was first linearized by methanolysis upon treatment with  $\text{CH}_3\text{ONa}/\text{CH}_3\text{OH}$  to afford the methoxy-substituted derivative **23**. Fragment ions of the b-, b-H<sub>2</sub>O (b\*-), and y-type, resulting from collision-induced dissociation of the  $[M + H]^+$  ion of **23**, are shown in *red*, *blue* and *yellow* respectively. The  $[M+H]^+$  and  $[M-H_2O+H]^+$  ions are shown in *maroon*.

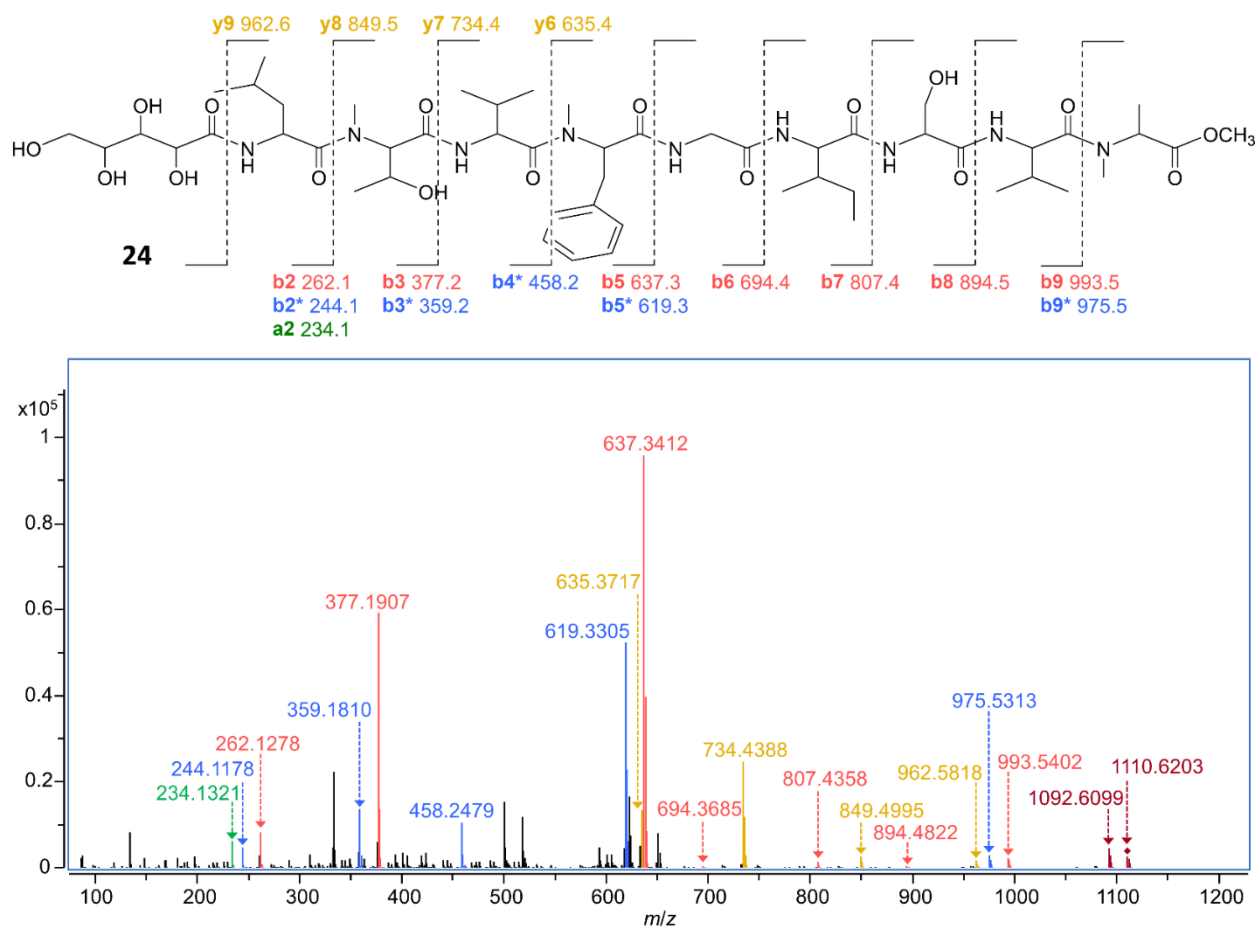

**Figure S1.8. Product ion mass spectrum of the  $[M + H]^+$  ion of **24** ( $m/z$  1110.6203).**

Compound **5** was first linearized by methanolysis upon treatment with  $\text{CH}_3\text{ONa}/\text{CH}_3\text{OH}$  to afford the methoxy-substituted derivative **24**. Fragment ions of the b-, b-H<sub>2</sub>O (b\*-), and y-type, resulting from collision-induced dissociation of the  $[M + H]^+$  ion of **24**, are shown in *red*, *blue* and *yellow* respectively. The  $[M+H]^+$  and  $[M-H_2O+H]^+$  ions are shown in *maroon*.

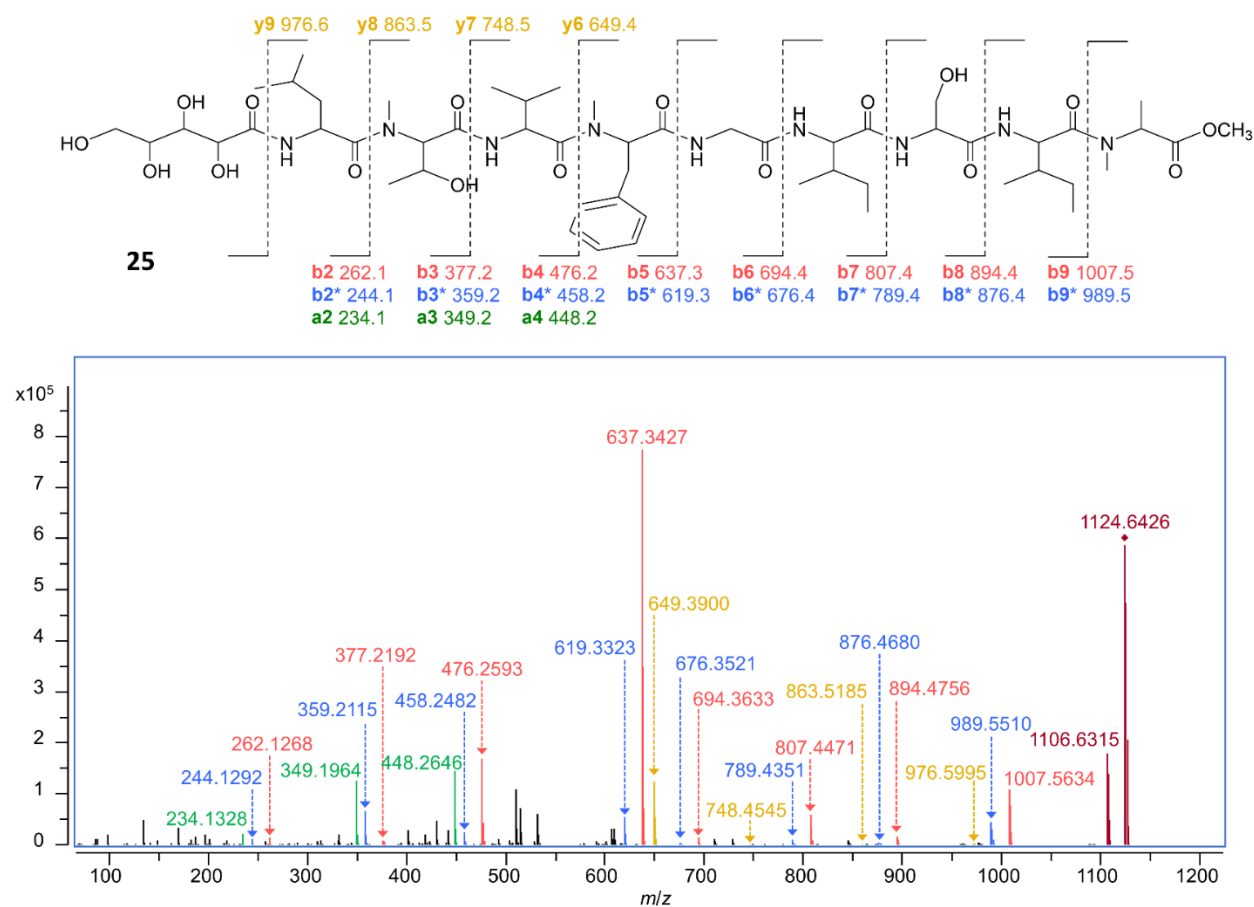

**Figure S1.9. Product ion mass spectrum of the  $[M+H]^+$  ion of **25** ( $m/z$  1124.6426).**

Compound **6** was first linearized by methanolysis upon treatment with  $\text{CH}_3\text{ONa}/\text{CH}_3\text{OH}$  to afford the methoxy-substituted derivative **25**. Fragment ions of the b-, b-H<sub>2</sub>O (b\*-), and y-type, resulting from collision-induced dissociation of the  $[M+H]^+$  ion of **25**, are shown in *red*, *blue* and *yellow* respectively. The  $[M+H]^+$  and  $[M-H_2O+H]^+$  ions are shown in *maroon*.

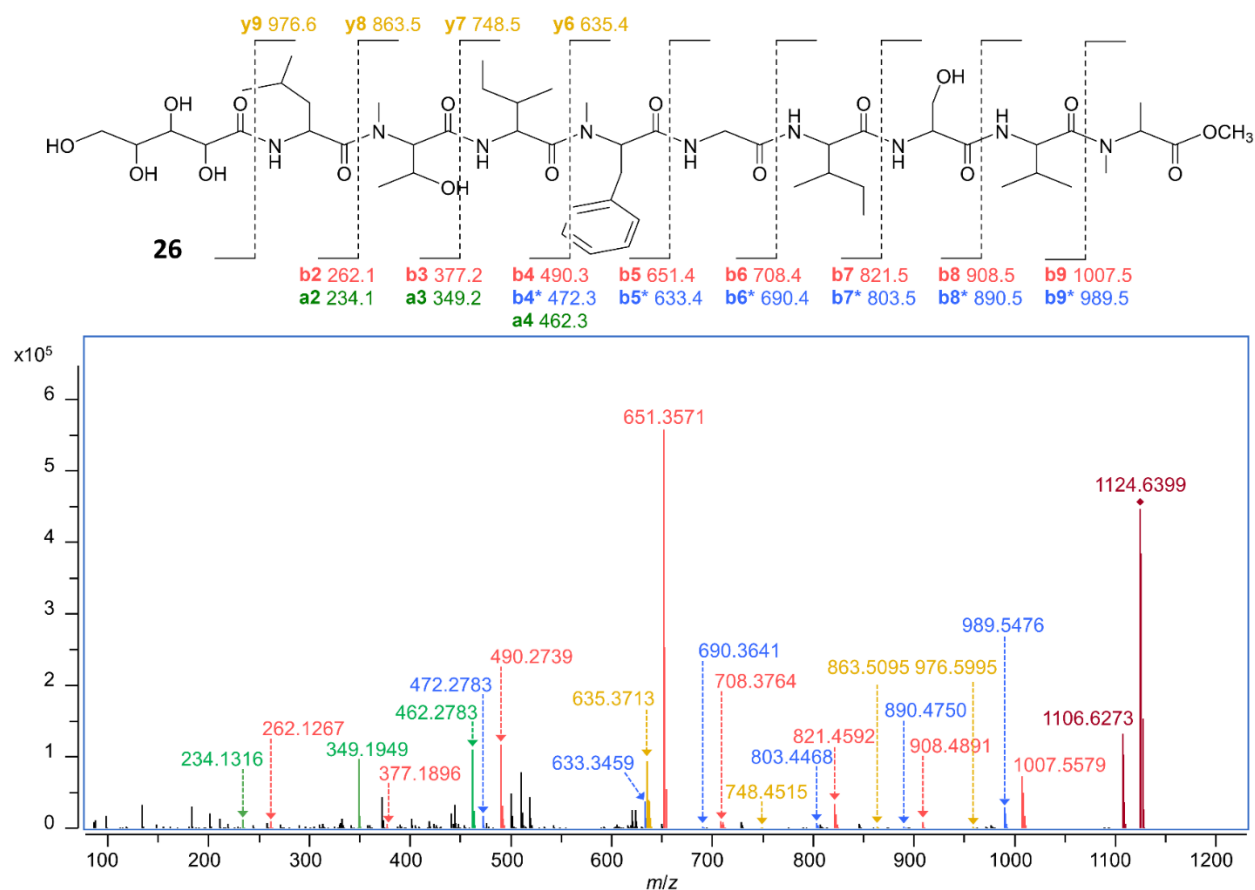

**Figure S1.10. Product ion mass spectrum of the  $[M + H]^+$  ion of **26** ( $m/z$  1124.6399).**

Compound **7** was first linearized by methanolysis upon treatment with  $\text{CH}_3\text{ONa}/\text{CH}_3\text{OH}$  to afford the methoxy-substituted derivative **26**. Fragment ions of the b-, b-H<sub>2</sub>O (b\*-), and y-type, resulting from collision-induced dissociation of the  $[M + H]^+$  ion of **26**, are shown in *red*, *blue* and *yellow* respectively. The  $[M+H]^+$  and  $[M-H_2O+H]^+$  ions are shown in *maroon*.



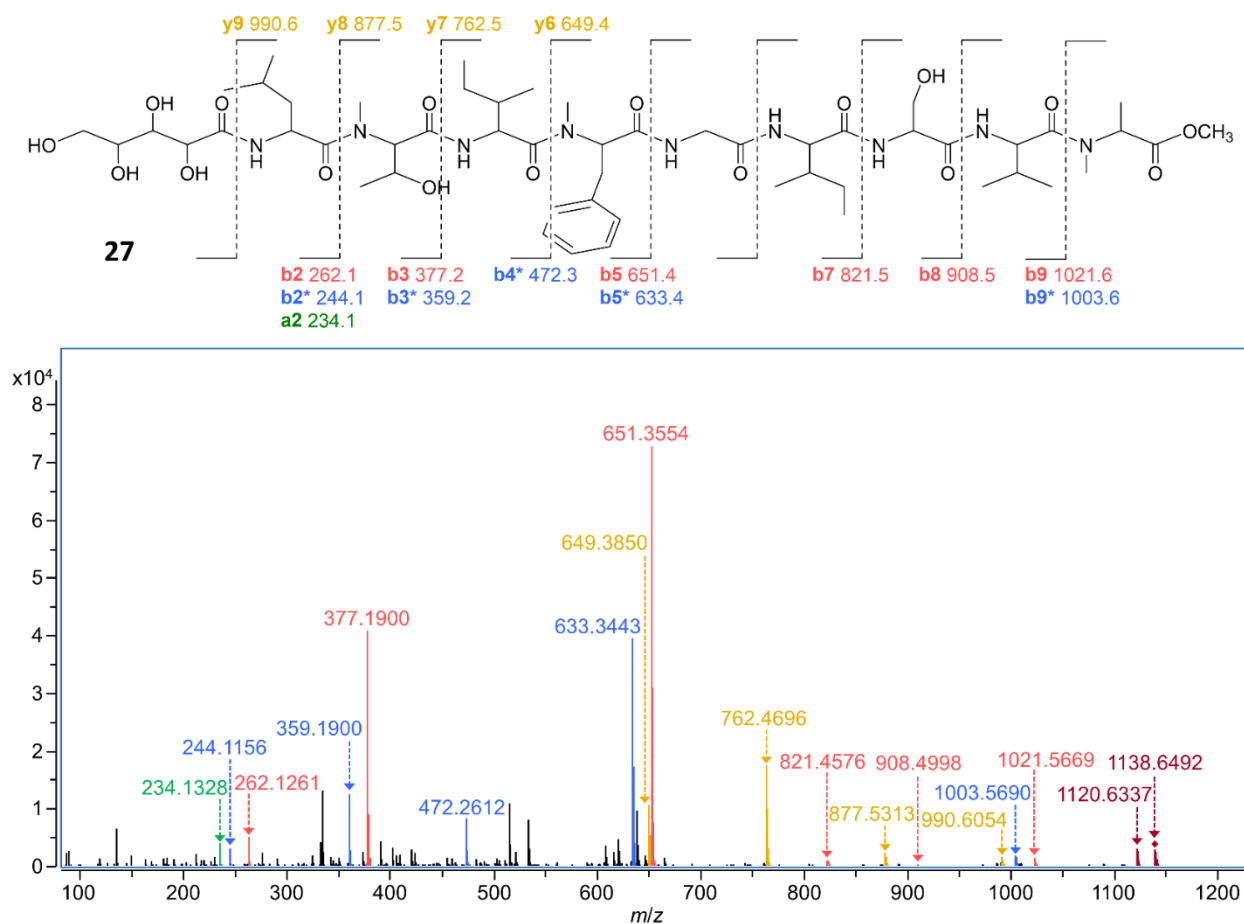

**Figure S1.11. Product ion mass spectrum of the  $[M + H]^+$  ion of **27** ( $m/z$  1138.6492).**

Compound **10** was first linearized by methanolysis upon treatment with  $\text{CH}_3\text{ONa}/\text{CH}_3\text{OH}$  to afford the methoxy-substituted derivative **27**. Fragment ions of the  $b$ -,  $b\text{-H}_2\text{O}$  ( $b^*$ -), and  $y$ -type, resulting from collision-induced dissociation of the  $[M + H]^+$  ion of **27**, are shown in *red*, *blue* and *yellow* respectively. The  $[M+H]^+$  and  $[M\text{-H}_2\text{O}+H]^+$  ions are shown in *maroon*.

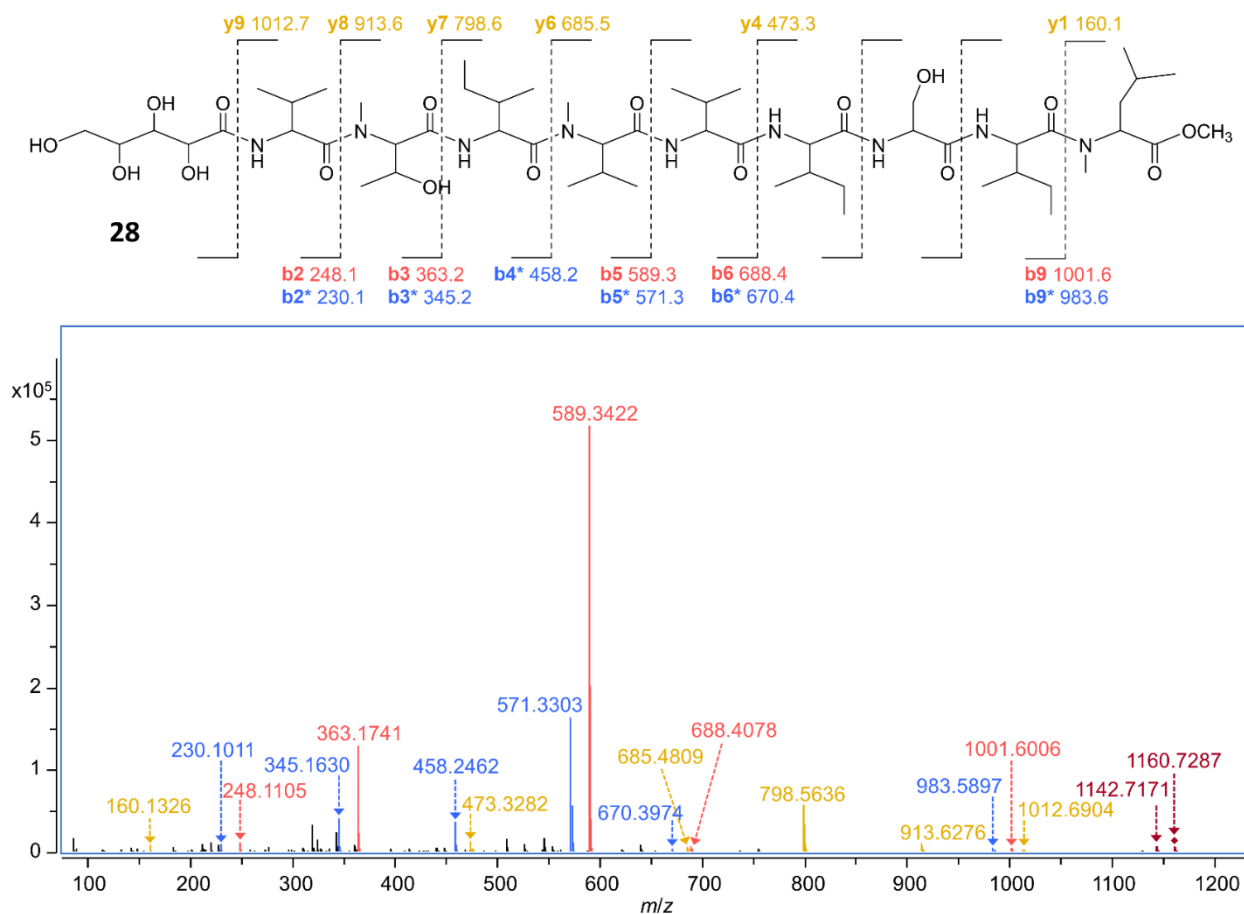

**Figure S1.12. Product ion mass spectrum of the  $[M + H]^+$  ion of **28** ( $m/z$  1160.7287).**

Compound **11** was first linearized by methanolysis upon treatment with  $\text{CH}_3\text{ONa}/\text{CH}_3\text{OH}$  to afford the methoxy-substituted derivative **28**. Fragment ions of the b-, b-H<sub>2</sub>O (b\*-), and y-type, resulting from collision-induced dissociation of the  $[M + H]^+$  ion of **28**, are shown in *red*, *blue* and *yellow* respectively. The  $[M+H]^+$  and  $[M-H_2O+H]^+$  ions are shown in *maroon*.

Figure S2. Chemical structures and key  $^1\text{H}$ - $^1\text{H}$  COSY/TOCSY (bold lines), HMBC (plain arrows) and NOE (dashed arrows) correlations of isolated compounds.

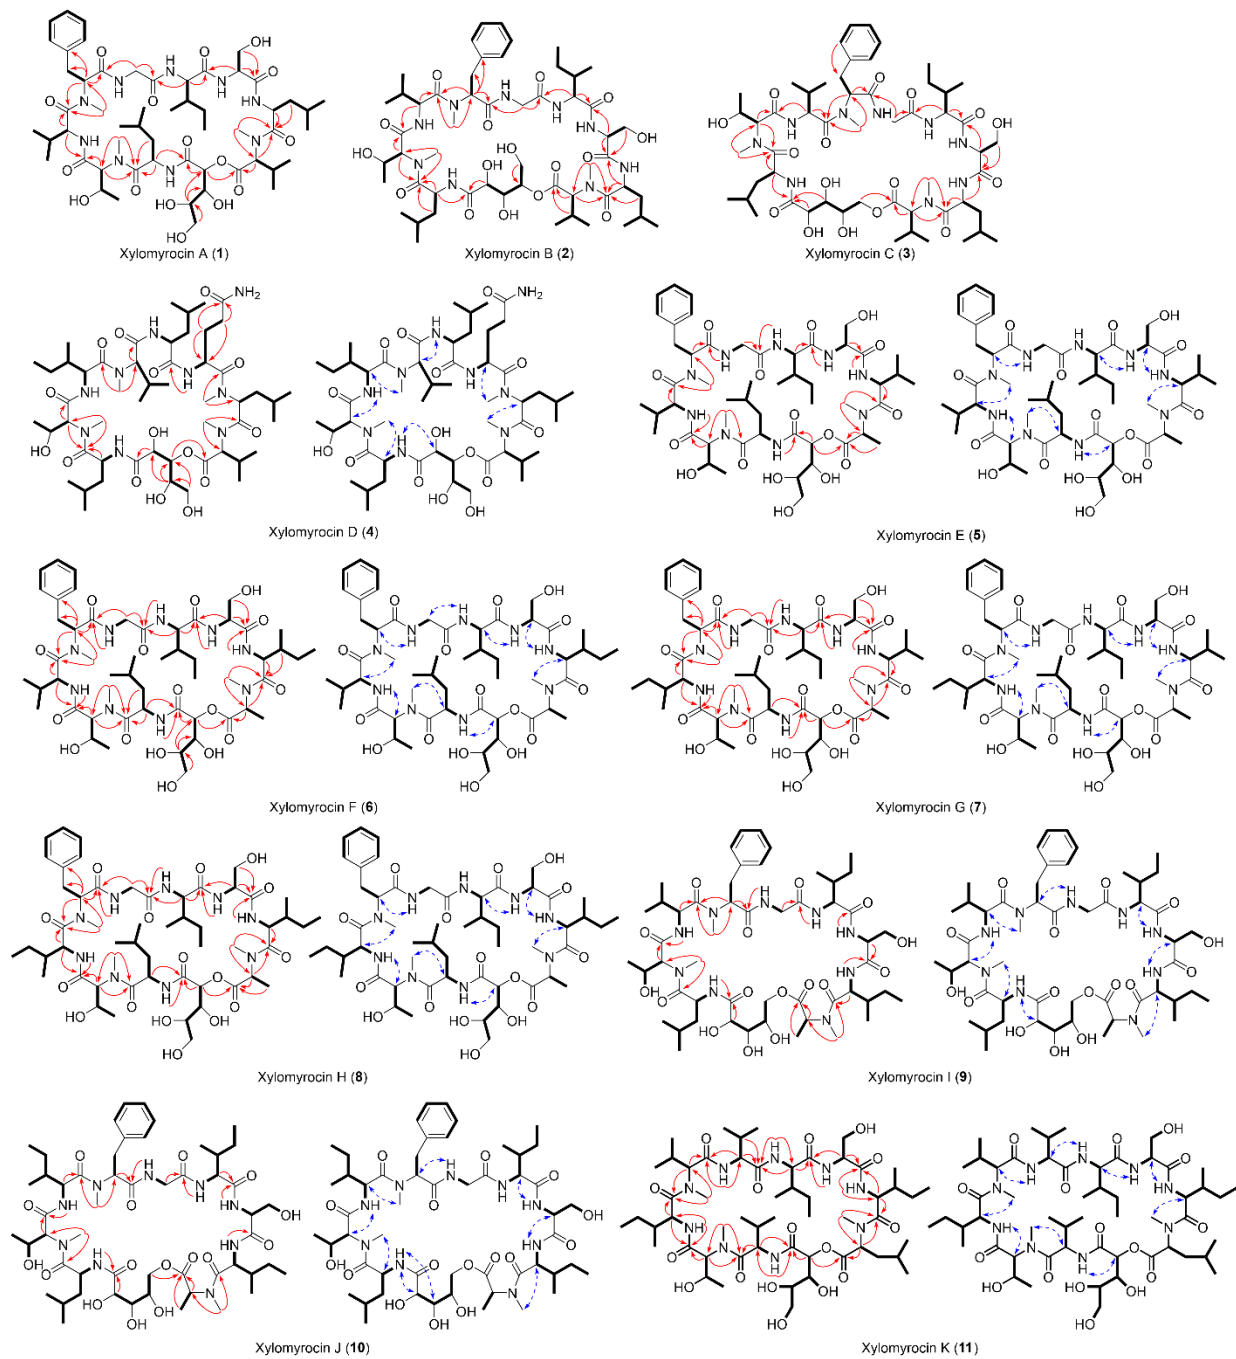

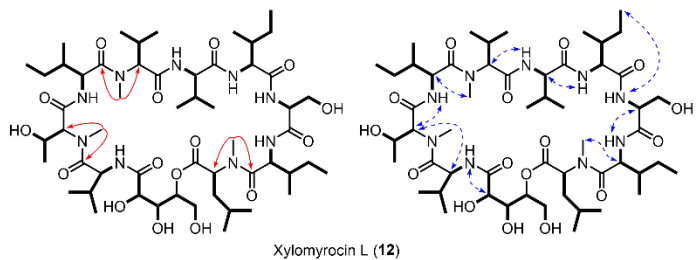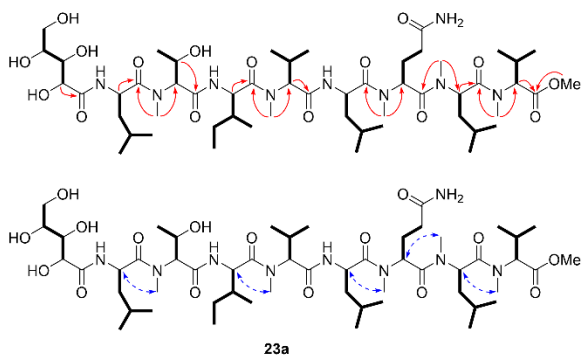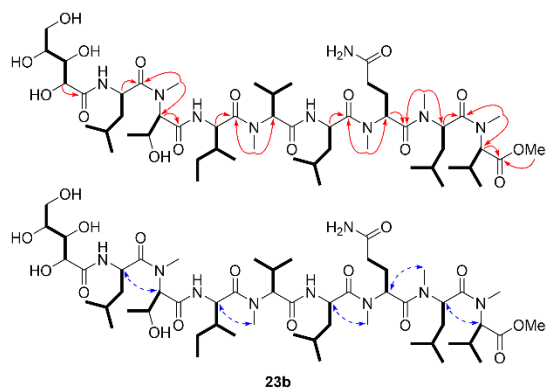

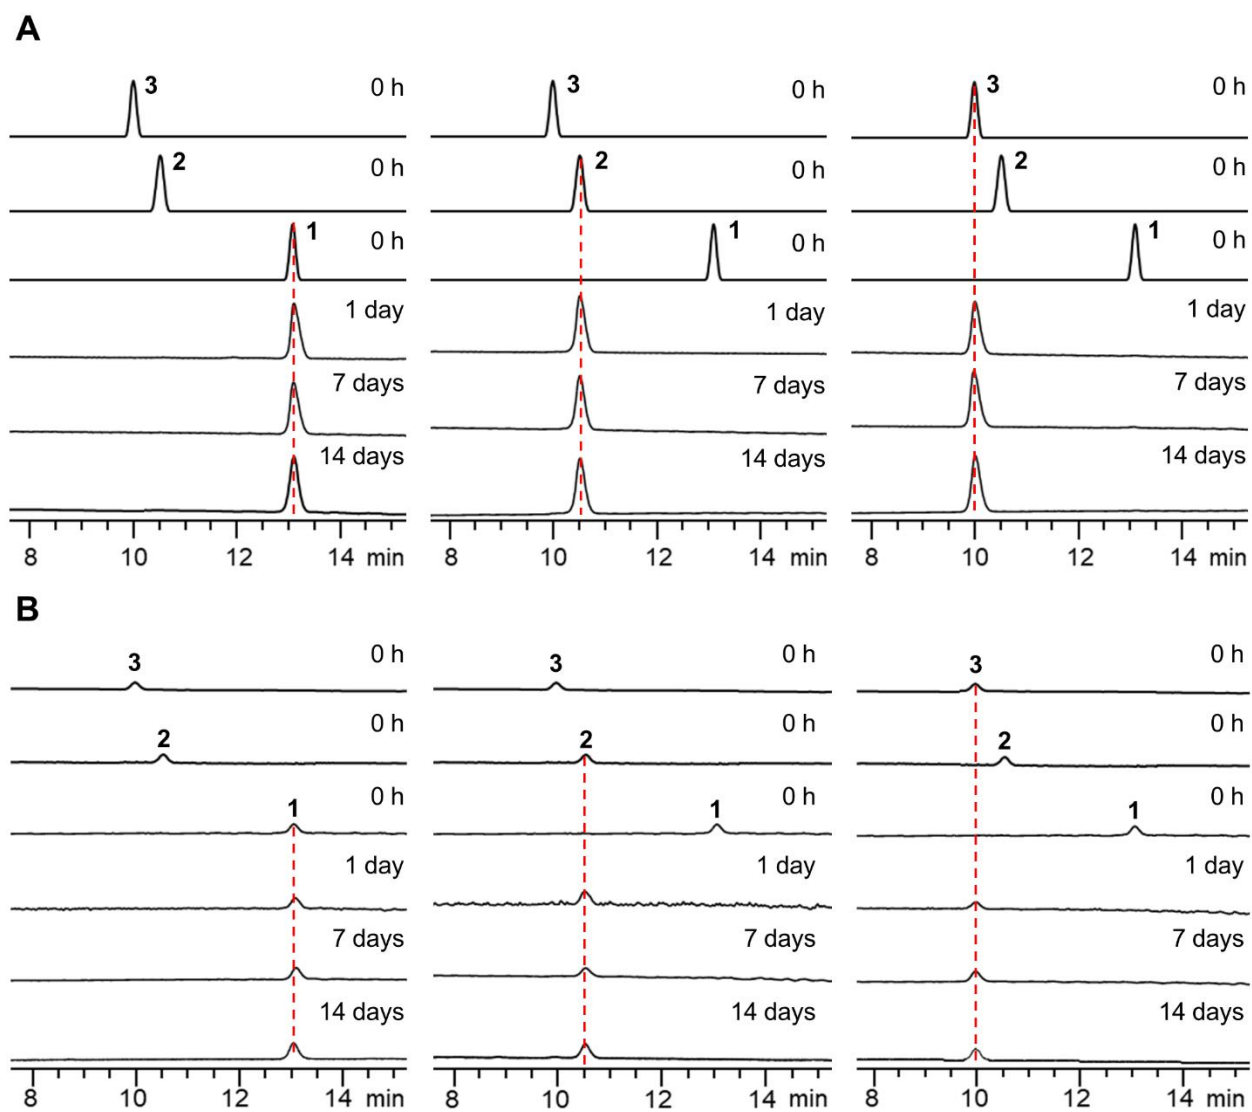

**Figure S3. Stability of the ester linkage in xylomyrocins.**

HPLC traces of compounds 1–3, monitored at 210 nm, after incubation in **A.** acidic CH<sub>3</sub>CN (containing 1% formic acid, pH = 5.5) or **B.** acidic water (containing 1% formic acid, pH = 5.0) for 1, 7, and 14 days.

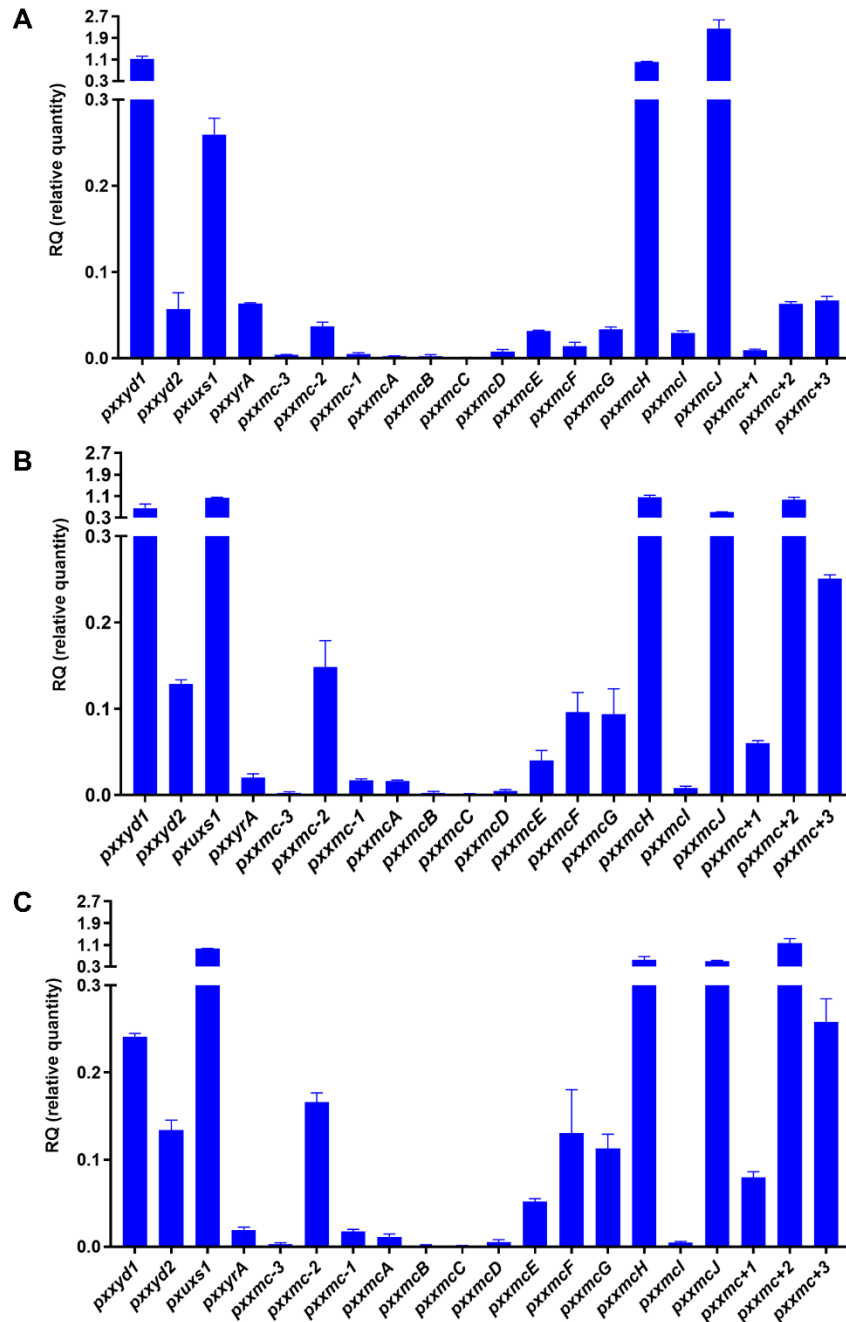

**Figure S4. RT-qPCR analysis of *pxyd1*, *pxyd2*, *pxuxs1*, *pxxyrA*, and genes in the *pxmc* locus.**

*Paramyothecium* sp. XJ0827 was grown in liquid M-100 media for: **A**, 5 days; **B**, 7 days; and **C**, 9 days. The  $\beta$ -tubulin-encoding gene was used as the reference gene, and the relative expression fold-change was calculated using the comparative threshold cycle  $2^{-\Delta\Delta CT}$  method. Data were collected from three biological replicates measured in three technical replicates each (n = 9). Columns represents the mean  $\pm$  SE.

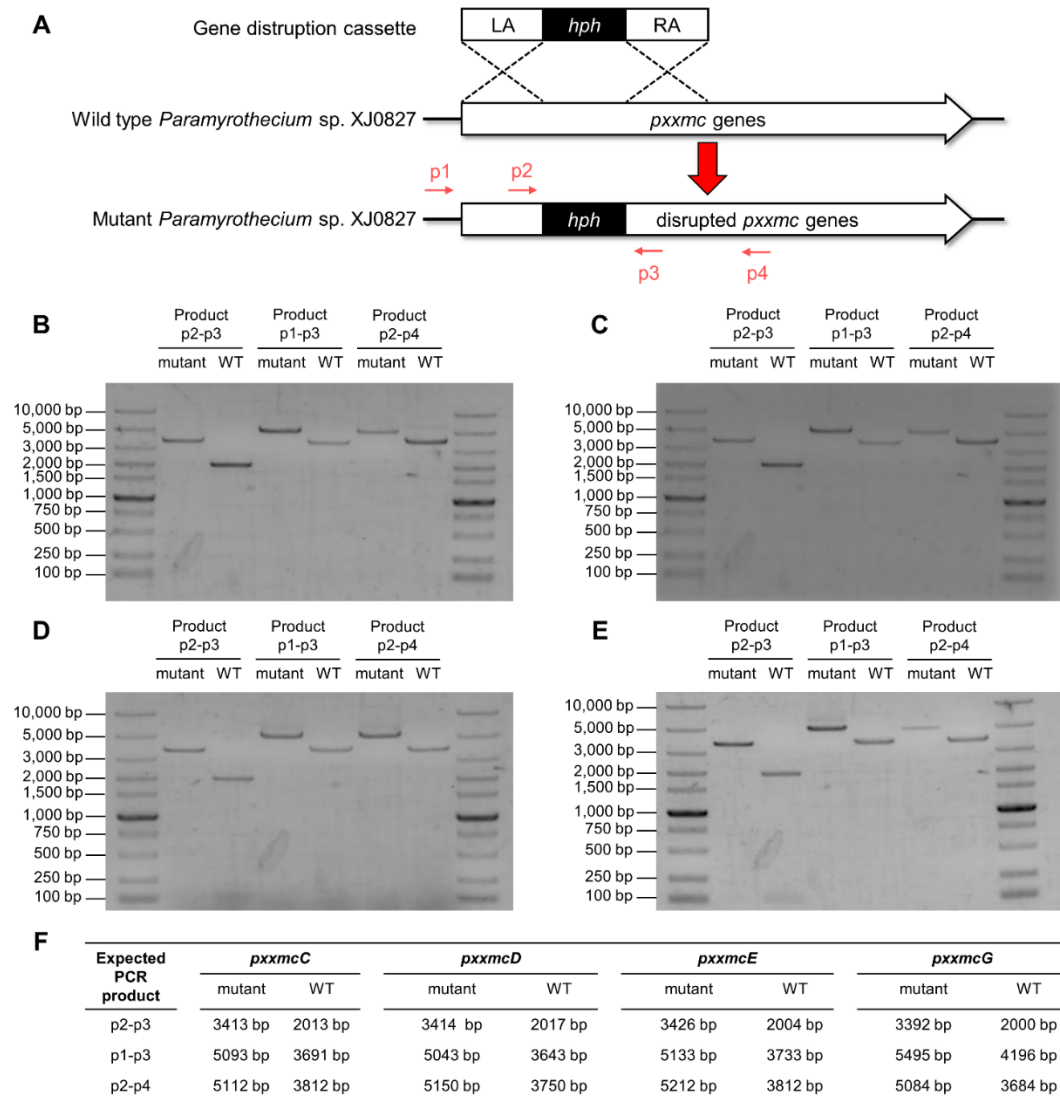

**Figure S5. Targeted disruption of *pxxmc* genes.**

**A.** Scheme for the double homologous recombination between a *pxxmc* gene disruption cassette and the *Paramyrothecium* sp. XJ0827 genome. Primers p1–p4 (red arrows), locating outside (p1 and p4) and inside (p2 and p3) the left or the right targeting arms were used for PCR validation of the hygromycin resistant gene knockout *Paramyrothecium* sp. XJ0827 strains. PCR products for representative isolates of the wild type XJ0827 strain (WT, control) and: **B.** the  $\Delta$ *pxxmcC* mutant; **C.** the  $\Delta$ *pxxmcD* mutant; **D.** the  $\Delta$ *pxxmcE* mutant; and **E.** the  $\Delta$ *pxxmcG* mutant. **F.** The expected lengths of the PCR products amplified by the appropriate primers using the wild type or the mutant *Paramyrothecium* sp. XJ0827 genomic DNA as the template.

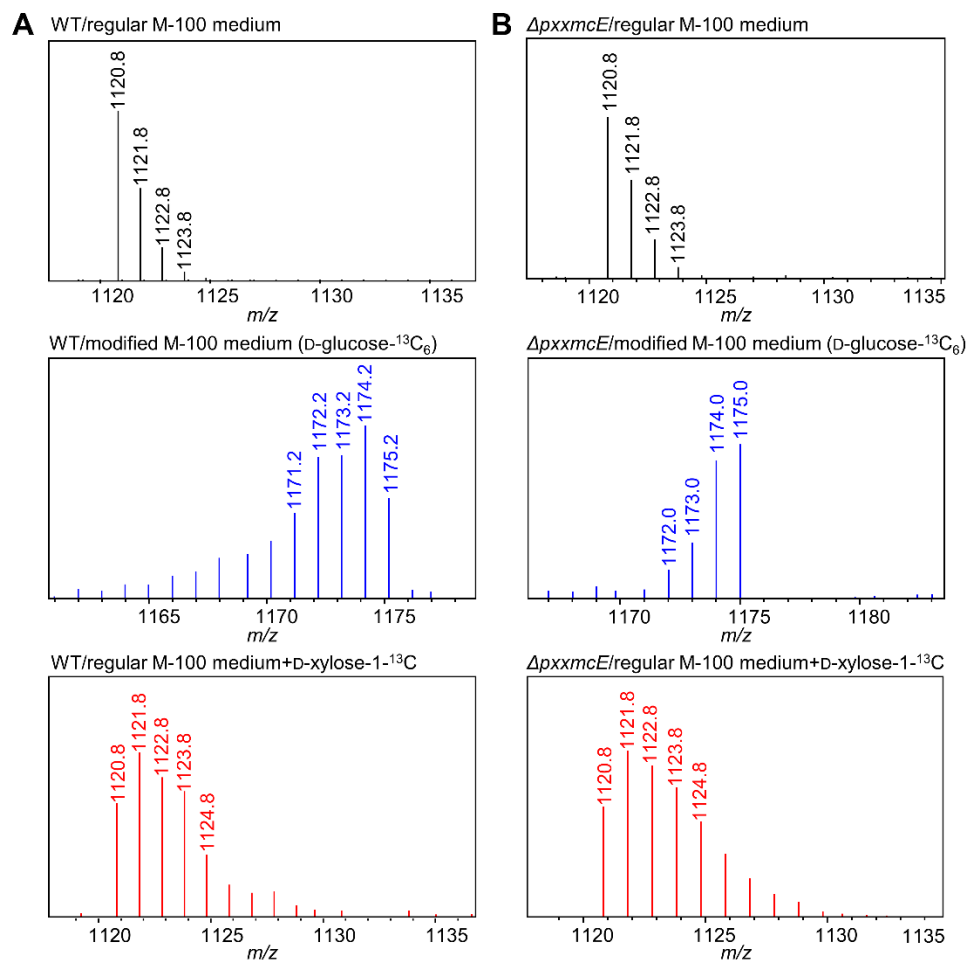

**Figure S6. Mass spectra of isotopically labeled xylomyrocin A.**

Mass spectra of **1** from culture extract of **A.** the wild type or **B.** the  $\Delta pxxmcE$  strain of *Paramyrothecium* sp. XJ0827 grown in regular M-100 medium (*black*), or modified M-100 medium where D-glucose- $^{13}C_6$  replaces D-glucose as the sole carbon source (*blue*), or regular M-100 medium with the supplementation of D-xylose-1- $^{13}C$  (*red*).



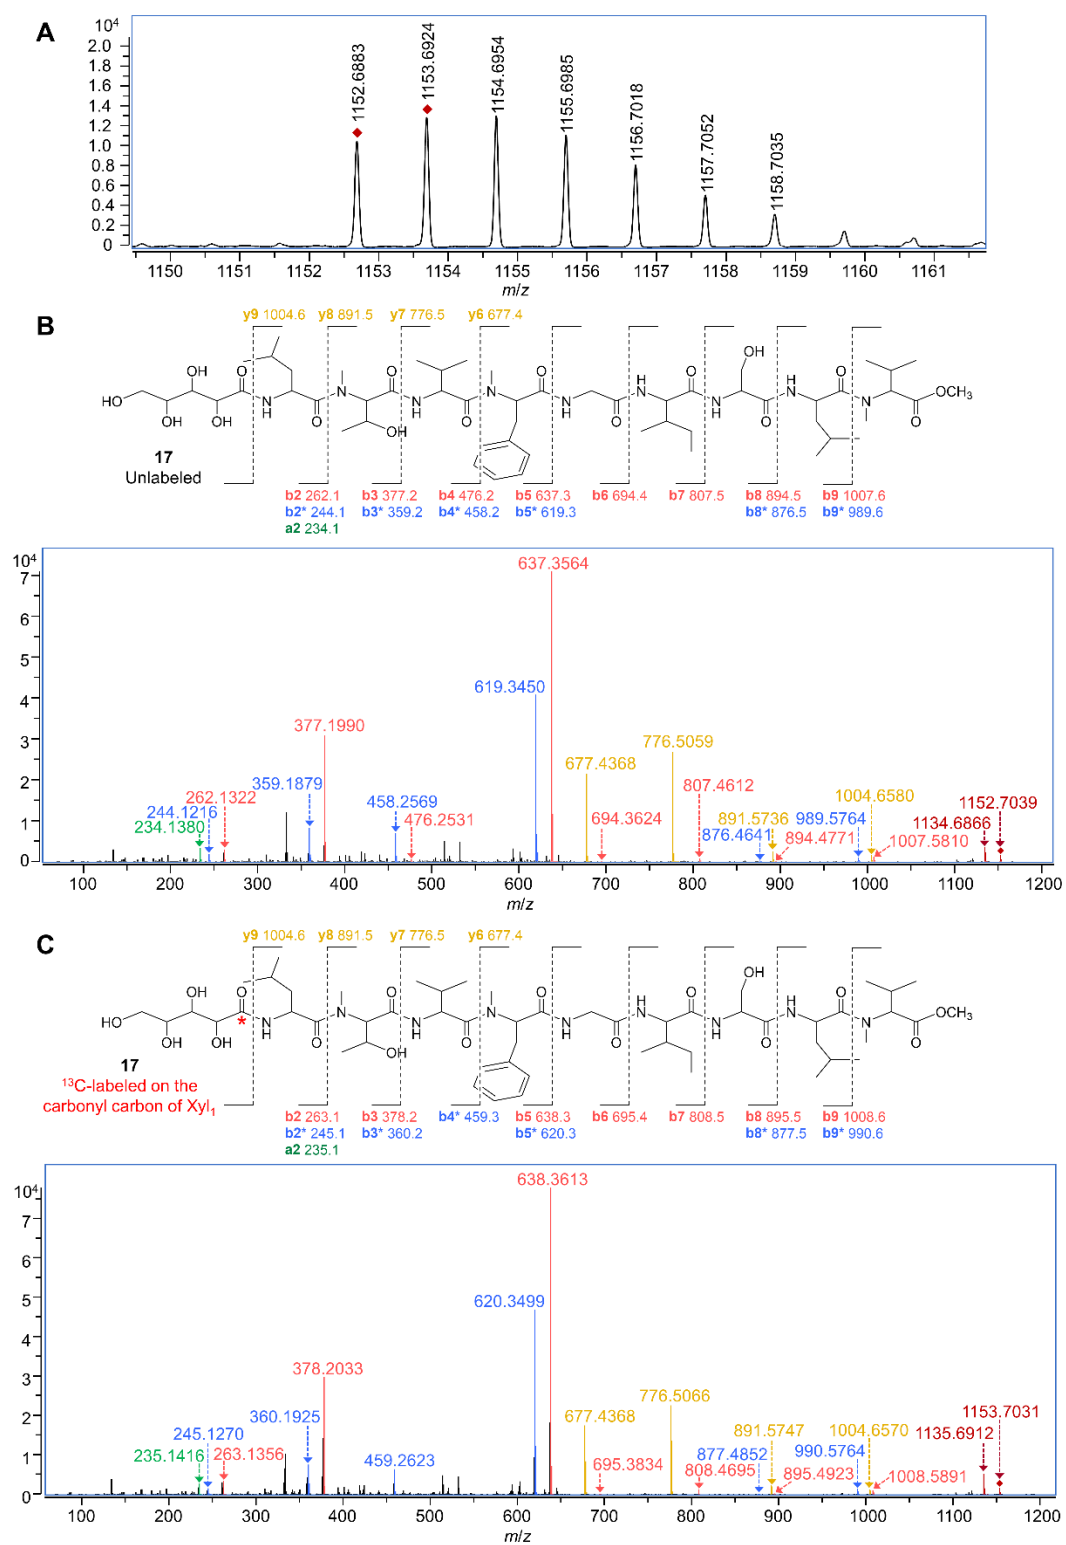

**Figure S7. Tandem mass analysis of linearized 1 (17) with isotopical label.**

**A.** Mass spectra of 17 obtained from culture extract of wild type *Paramyothecium* sp. XJ0827 grown in

regular M-100 medium with the supplementation of D-xylose-1-<sup>13</sup>C. **B.** Theoretical and experimental MS/MS fragmentation pattern of unlabeled **17**. **C.** Theoretical and experimental MS/MS fragmentation pattern of <sup>13</sup>C-labeled **17**. The labeling position is indicated by an asterisk. Fragment ions of the a-, b-, b-H<sub>2</sub>O (b\*-), and γ-type, resulting from collision-induced dissociation are shown in *green*, *red*, *blue* and *yellow* respectively. The [M+H]<sup>+</sup> and [M-H<sub>2</sub>O+H]<sup>+</sup> ions are shown in *maroon*.

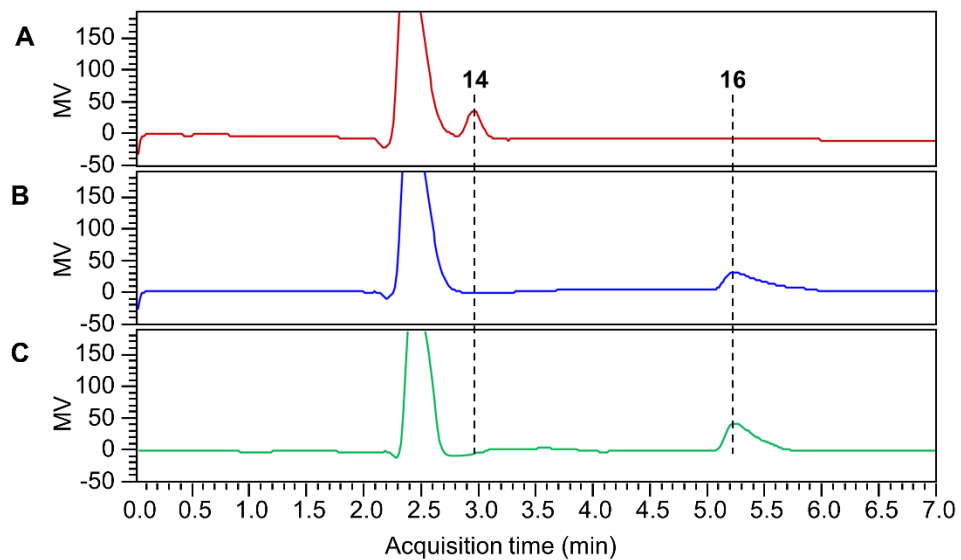

**Figure S8. HPLC analysis of the hydrolysis of D-xylono- $\gamma$ -lactone (14).**

**A.** D-xylono- $\gamma$ -lactone (14), **B.** D-xylonic acid (16), and **C.** D-xylono- $\gamma$ -lactone hydrolysate (15).

HPLC was carried out on a Waters Alliance e2695 system coupled with a Waters 2414 refractive index detector. Hydrolysate **15** was prepared by treating **14** with 1 M aqueous NaOH solution.

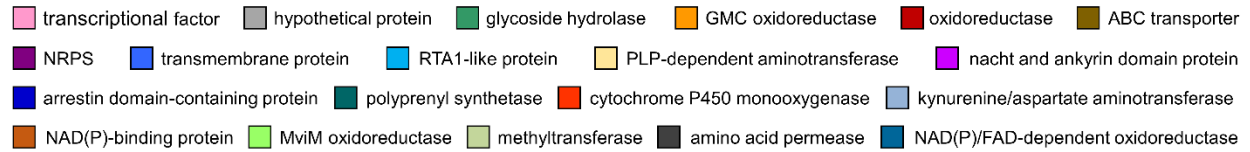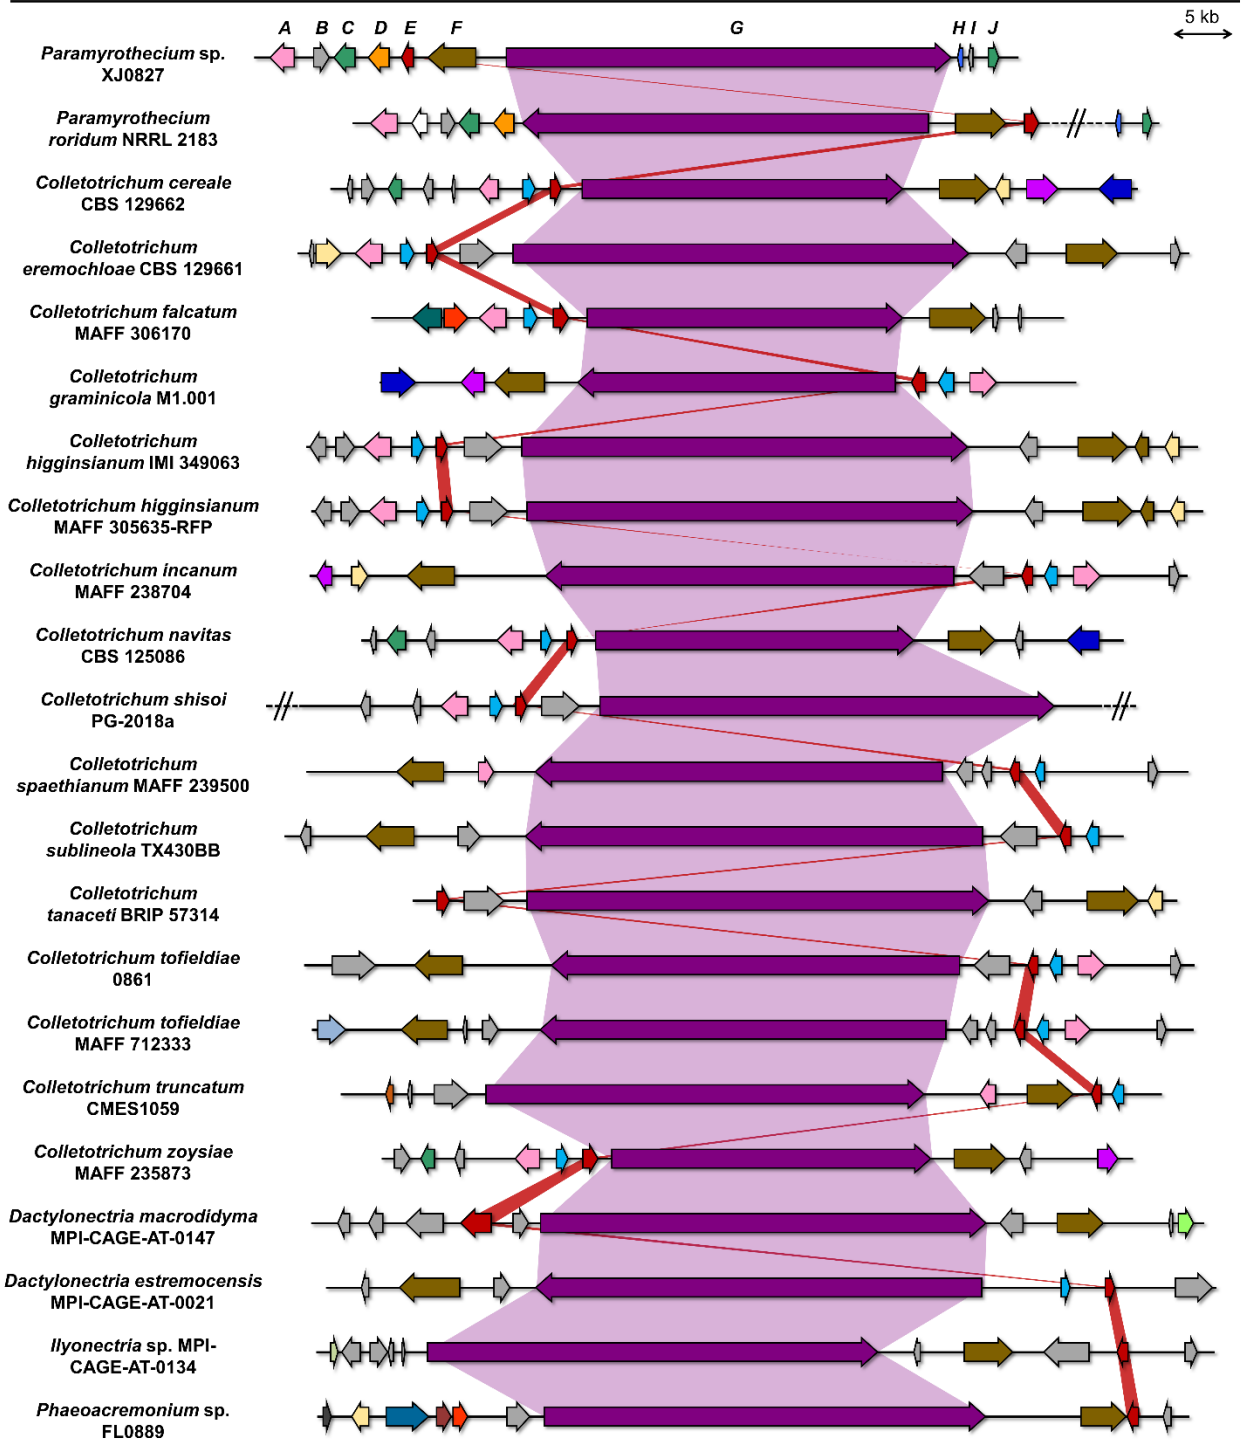

Figure S9. *pxxmc*-like BGCs in fungal genomes.

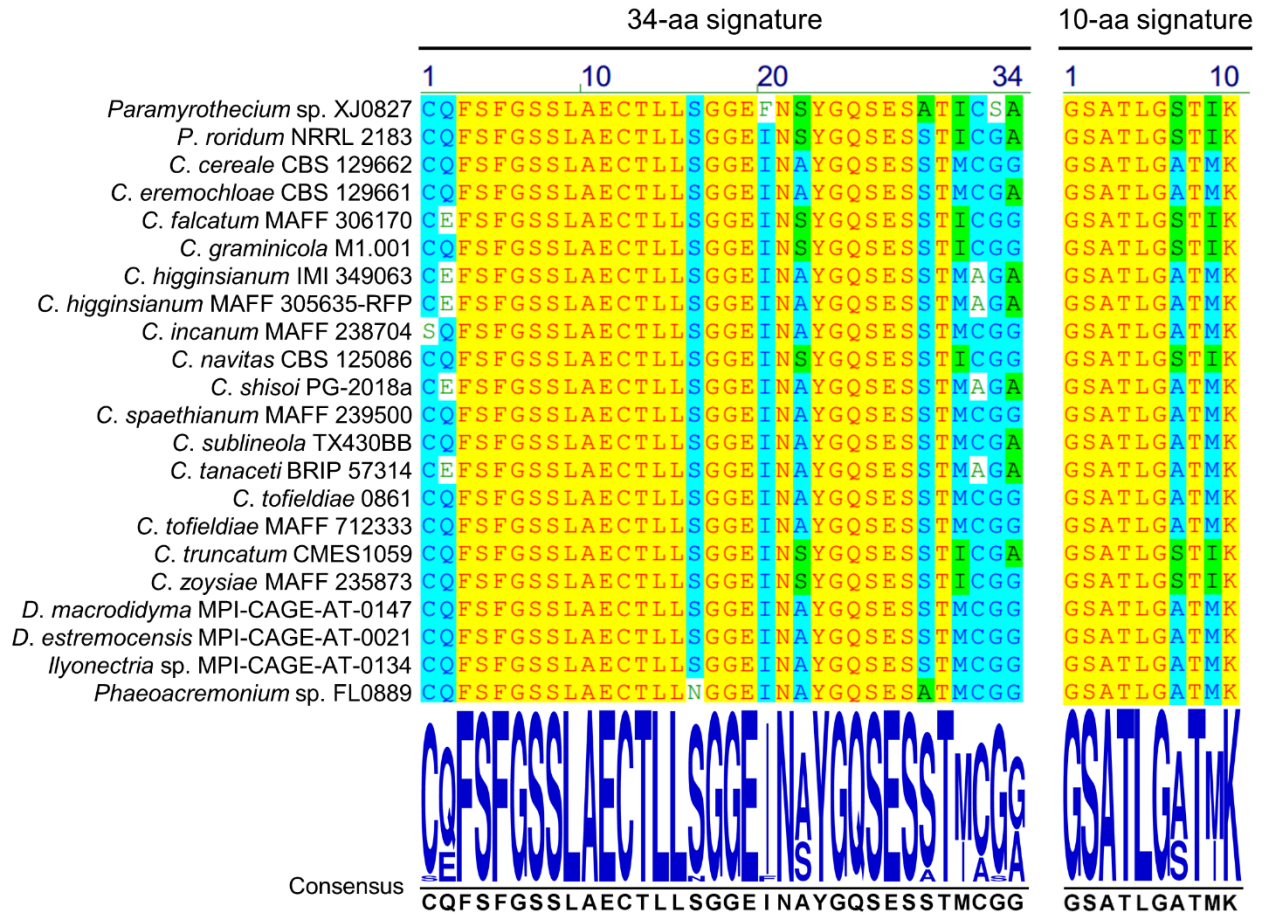

**Figure S10. Substrate specificity signatures of the A<sub>1</sub> domains of PxXmcG homologues found in fungal genomes<sup>21-22</sup>**

| Compound | Producer                          | Amino Acids/Hydroxy Acids |                  |                    |                  |                    |                  |                  |                  |                  |                     | Lactone Ring |
|----------|-----------------------------------|---------------------------|------------------|--------------------|------------------|--------------------|------------------|------------------|------------------|------------------|---------------------|--------------|
|          |                                   | Xyl <sub>1</sub>          | Leu <sub>2</sub> | MeThr <sub>3</sub> | Val <sub>4</sub> | MePhe <sub>5</sub> | Gly <sub>6</sub> | Ile <sub>7</sub> | Ser <sub>8</sub> | Leu <sub>9</sub> | MeVal <sub>10</sub> |              |
| 1        | <i>Paramyrothecium</i> sp. XJ0827 | Yellow                    | Blue             | Blue               | Green            | Blue               | Blue             | Blue             | Blue             | Green            | Green               | α-OH         |
| 2        | <i>Paramyrothecium</i> sp. XJ0827 | Yellow                    | Blue             | Blue               | Green            | Blue               | Blue             | Blue             | Blue             | Green            | Green               | γ-OH         |
| 3        | <i>Paramyrothecium</i> sp. XJ0827 | Yellow                    | Blue             | Blue               | Green            | Blue               | Blue             | Blue             | Blue             | Green            | Green               | δ-OH         |
| 4        | <i>P. roridum</i> NRRL 2183       | Yellow                    | Blue             | Blue               | Blue             | Blue               | White            | Green            | Blue             | Green            | Green               | α-OH         |
| M1       | <i>P. roridum</i> NRRL 2183       | Yellow                    | Blue             | Green              | Blue             | Blue               | White            | Green            | Blue             | Green            | Green               | nd           |
| M2       | <i>P. roridum</i> NRRL 2183       | Yellow                    | Blue             | Blue               | Blue             | Blue               | White            | Green            | Blue             | Green            | Green               | nd           |
| 5        | <i>P. roridum</i> MN131194        | Yellow                    | Blue             | Blue               | Green            | Blue               | Blue             | Blue             | Blue             | Green            | Green               | α-OH         |
| 6        | <i>P. roridum</i> MN131194        | Yellow                    | Blue             | Blue               | Green            | Blue               | Blue             | Blue             | Blue             | Green            | Green               | α-OH         |
| 7        | <i>P. roridum</i> MN131194        | Yellow                    | Blue             | Blue               | Blue             | Blue               | Blue             | Blue             | Blue             | Green            | Green               | α-OH         |
| 8        | <i>P. roridum</i> MN131194        | Yellow                    | Blue             | Blue               | Blue             | Blue               | Blue             | Blue             | Blue             | Green            | Green               | α-OH         |
| 9        | <i>P. roridum</i> MN131194        | Yellow                    | Blue             | Blue               | Green            | Blue               | Blue             | Blue             | Blue             | Green            | Green               | δ-OH         |
| 10       | <i>P. roridum</i> MN131194        | Yellow                    | Blue             | Blue               | Blue             | Blue               | Blue             | Blue             | Blue             | Green            | Green               | δ-OH         |
| 11       | <i>Colletotrichum</i> sp. XJ1040  | Yellow                    | Green            | Blue               | Blue             | Blue               | Blue             | Blue             | Blue             | Green            | Green               | α-OH         |
| 12       | <i>Colletotrichum</i> sp. XJ1040  | Yellow                    | Green            | Blue               | Blue             | Blue               | Blue             | Blue             | Blue             | Green            | Green               | γ-OH         |

**Figure S11. Sequence alignment of isolated xylomyrocins.**

Yellow: identical residues; blue: highly conserved residues; green: similar residues; white: divergent residues; nd: not determined. Gln: L-glutamine; Gly: glycine; Ile: L-isoleucine; Leu: L-leucine; MeAla: *N*-methyl-L-alanine; MeGln: *N*-methyl-L-glutamine; MeLeu: *N*-methyl-L-leucine; MePhe: *N*-methyl-L-phenylalanine; MeThr: *N*-methyl-L-threonine; MeVal: *N*-methyl-L-valine; Ser: L-serine; Thr: L-threonine; Val: L-valine; Xyl: D-xylonic acid.

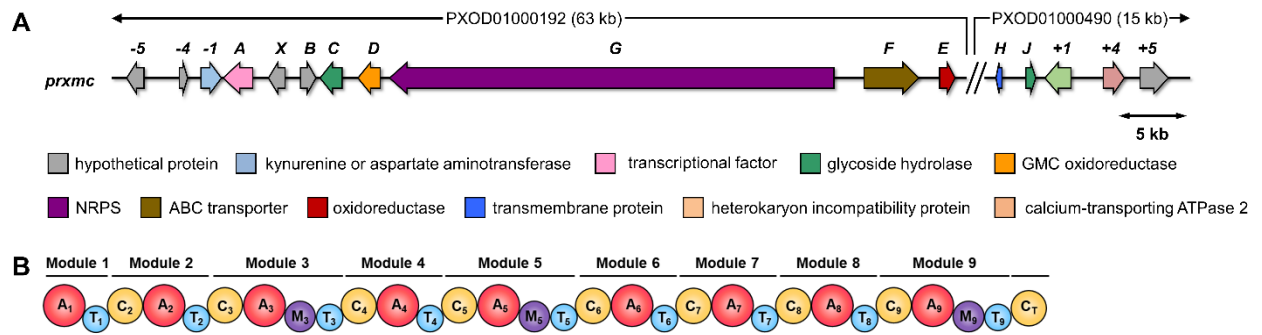

**Figure S12. Bioinformatic analysis of the *prxmc* locus in *Paramyrothecium roridum* NRRL 2183.**

**A.** Schematic representation of the *prxmc* locus. **B.** Domain organization of the NRPS PrXmcG.

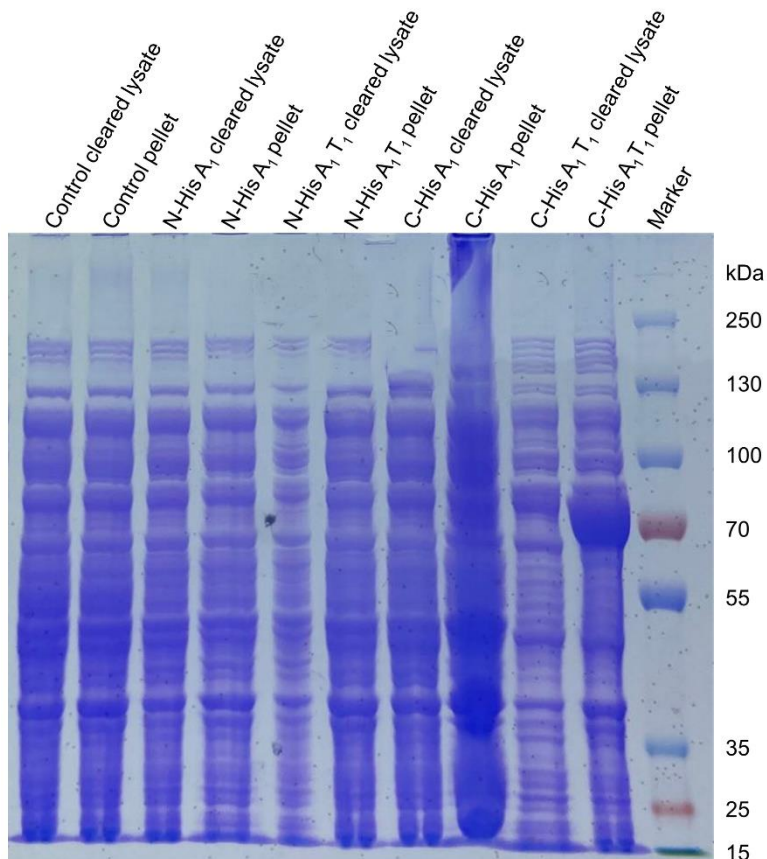

**Figure S13. Absence of soluble, dissected recombinant PxxmCG-A<sub>1</sub> and A<sub>1</sub>-T<sub>1</sub> in *E. coli* lysates.**

SDS-PAGE analysis of the cleared lysate and the pellet of *E. coli* BL21 cells carrying pET28a plasmids that encode the N-His or C-His tagged A<sub>1</sub> mono-domain (c.a. 61.3 kDa) or A<sub>1</sub>T<sub>1</sub> di-domain (c.a. 71.6 kDa) of PxxmCG. Expression was induced with 0.5 mM isopropyl β-D-thiogalactopyranoside (IPTG) and the cultures were incubated at 16 °C for 24 hrs with shaking at 250 rpm before the cells were harvested and lysed with sonication. The lysate and pellet of *E. coli* BL21 cells containing the empty pET28a vector were used as controls. Attempts to solubilize the putative C-His-A1T1 recombinant protein from the lysate pellets were unsuccessful. Induction with different IPTG concentrations (1, 0.5, or 0.15 mM), expression temperatures (25 °C, 16 °C, or 11 °C), and cultivation times (18 hrs or 24 hrs) did not afford soluble recombinant protein either with any of the expression constructs.



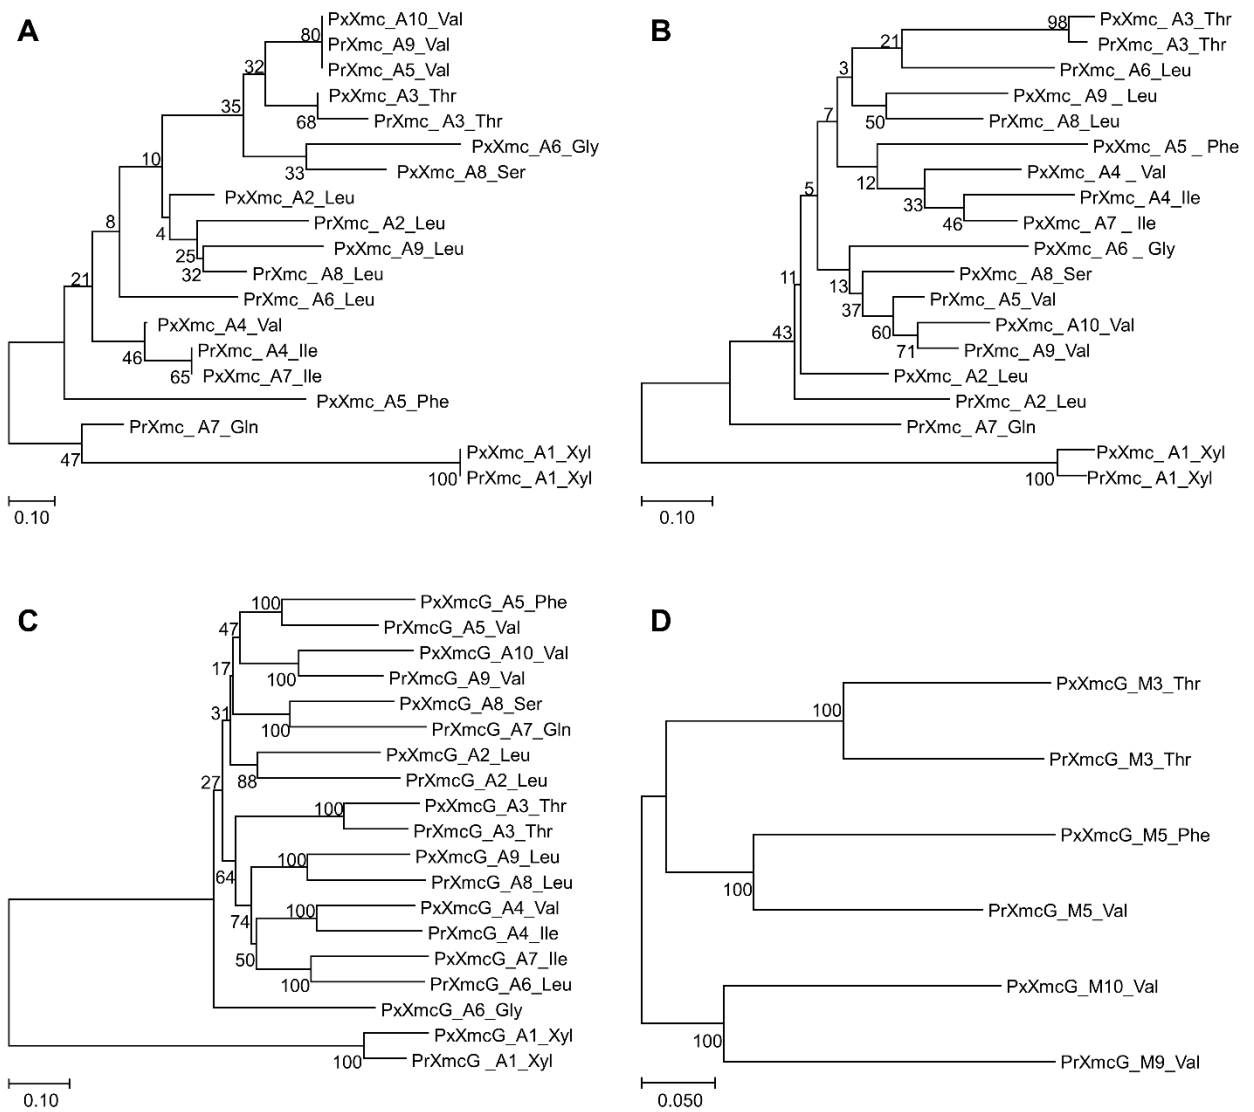

**Figure S14. Phylogenetic analysis of A and M domains from PxXmcG and PrXmcG.**

**A.** 10 aa code of A domains; **B.** 34 aa code of A domains; **C.** full length A domains; and **D.** full length M domains. Amino acid sequences were aligned by ClustalW, and phylogenetic analysis was carried out using the neighbor joining method in MEGA 7.

**Figure S15. Advanced Marfey's analysis**

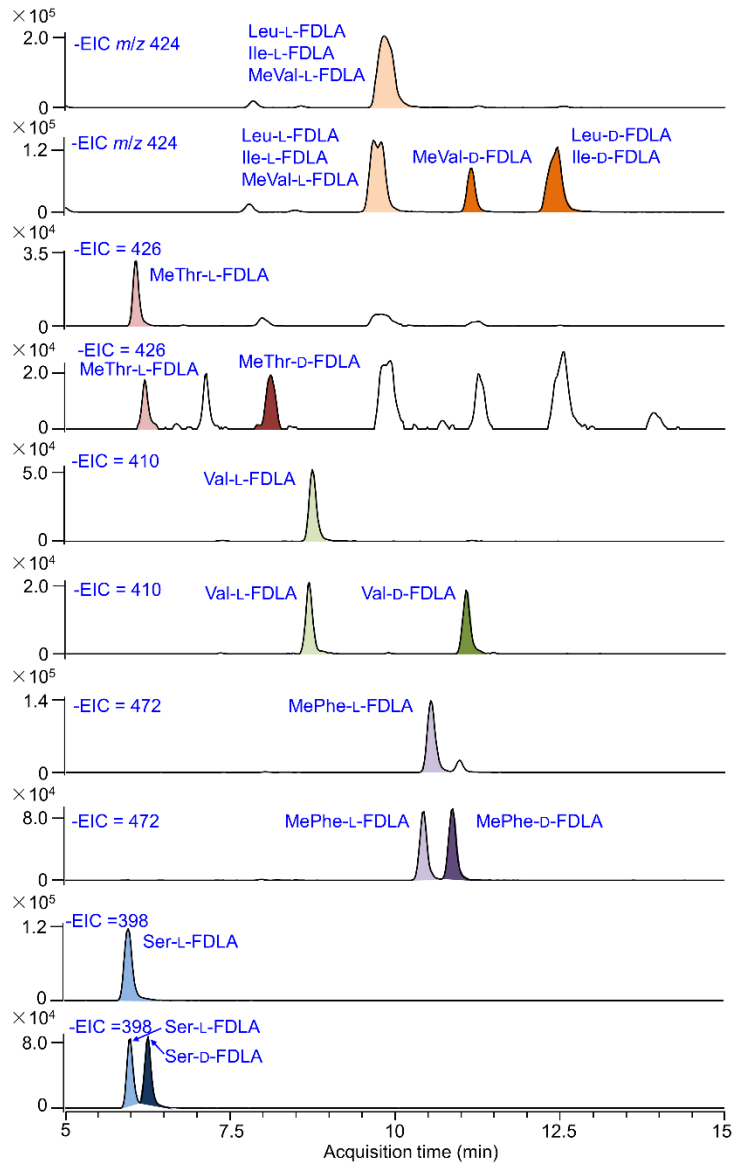

**Figure S15.1. Extracted ion chromatograms of L- and D/L-FDLA derivatives of the acid hydrolysate of 1**

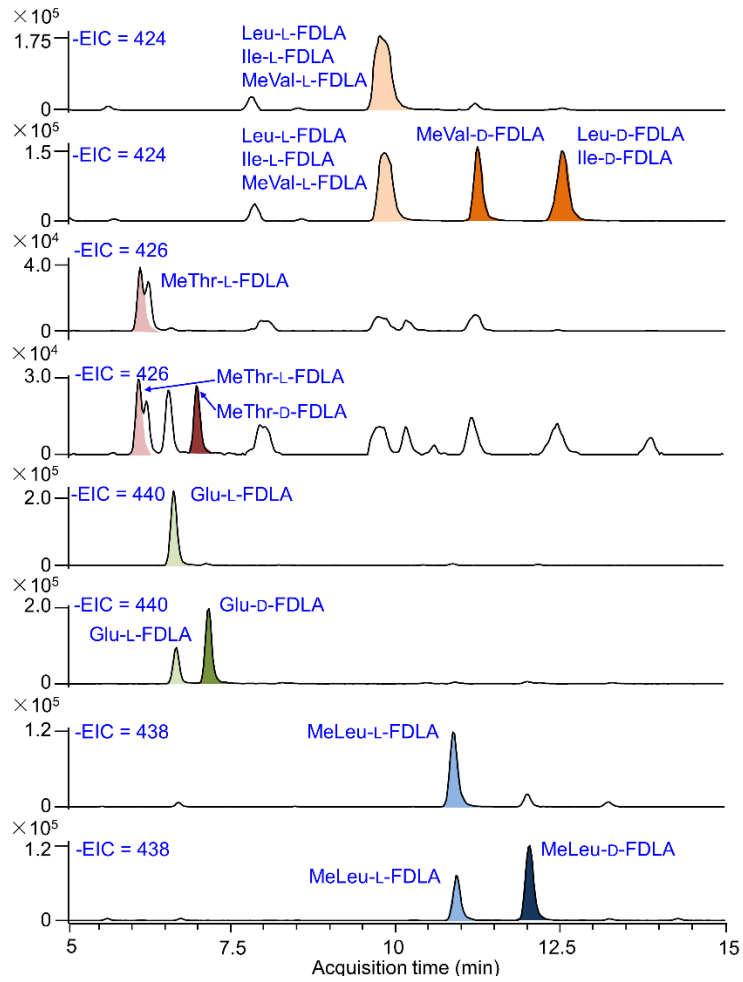

**Figure S15.2. Extracted ion chromatograms of L- and D/L-FDLA derivatives of the acid hydrolysate of 4**  
 Glutamine (Gln) was converted to glutamic acid (Glu) after HCl hydrolysis.

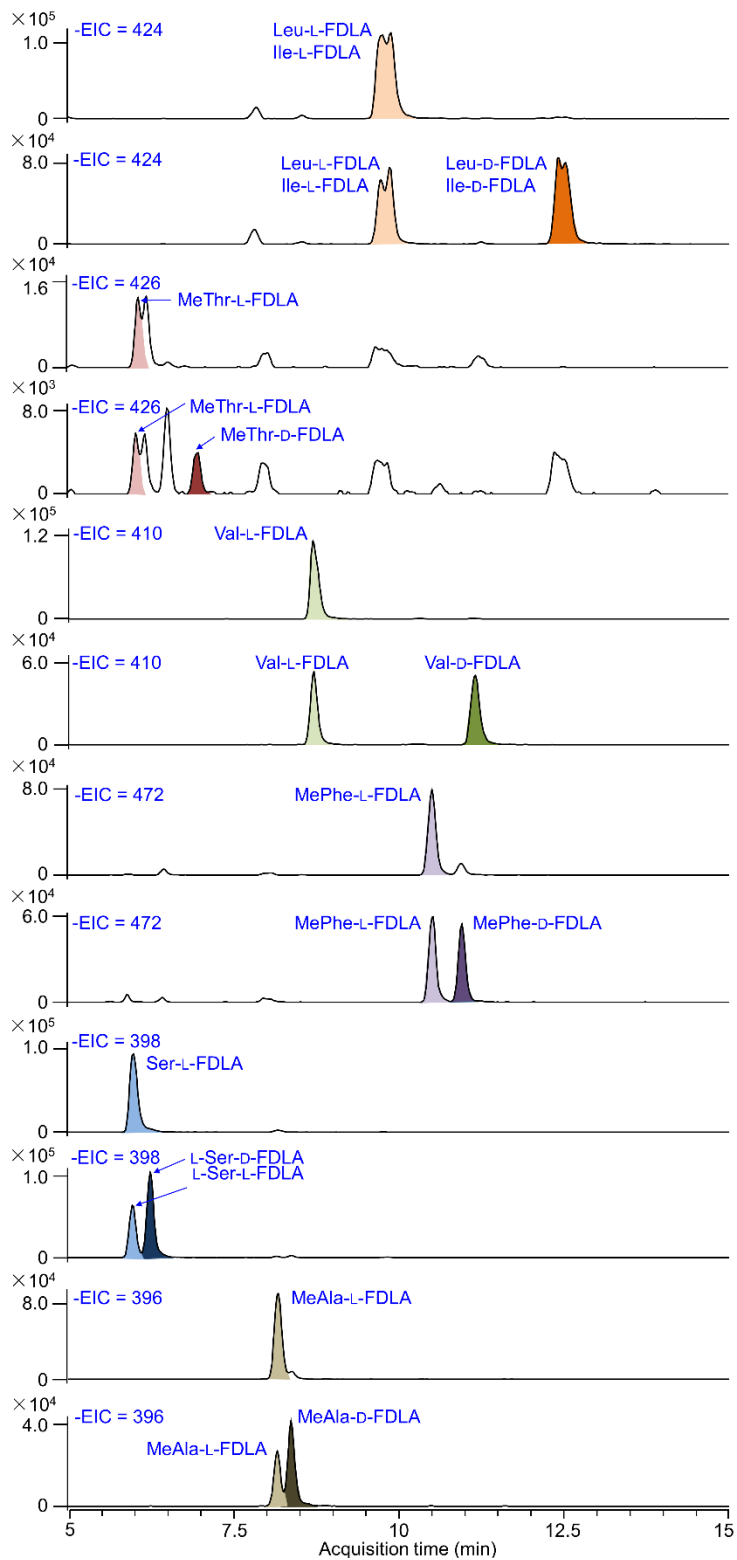

Figure S15.3. Extracted ion chromatograms of L- and D/L-FDLA derivatives of the acid hydrolysate of 6

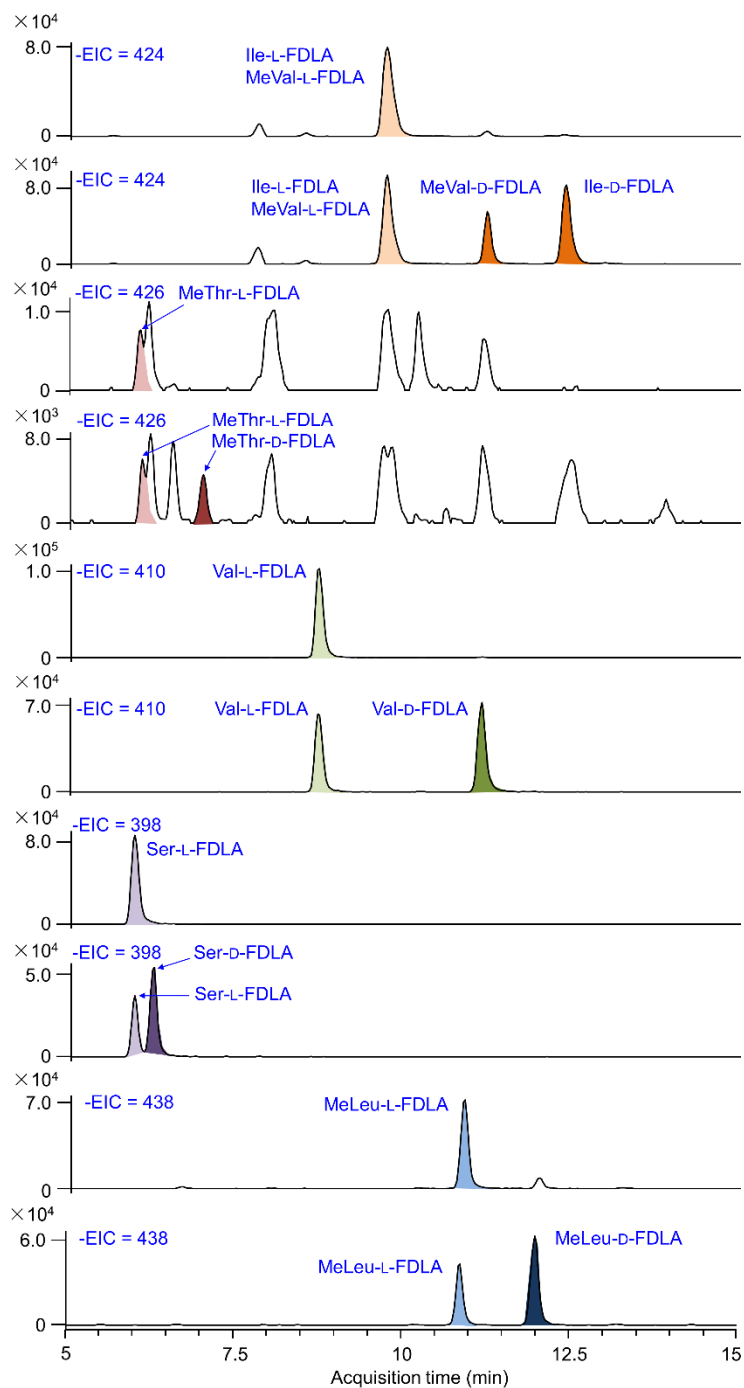

Figure S15.4. Extracted ion chromatograms of L- and D/L-FDLA derivatives of the acid hydrolysate of

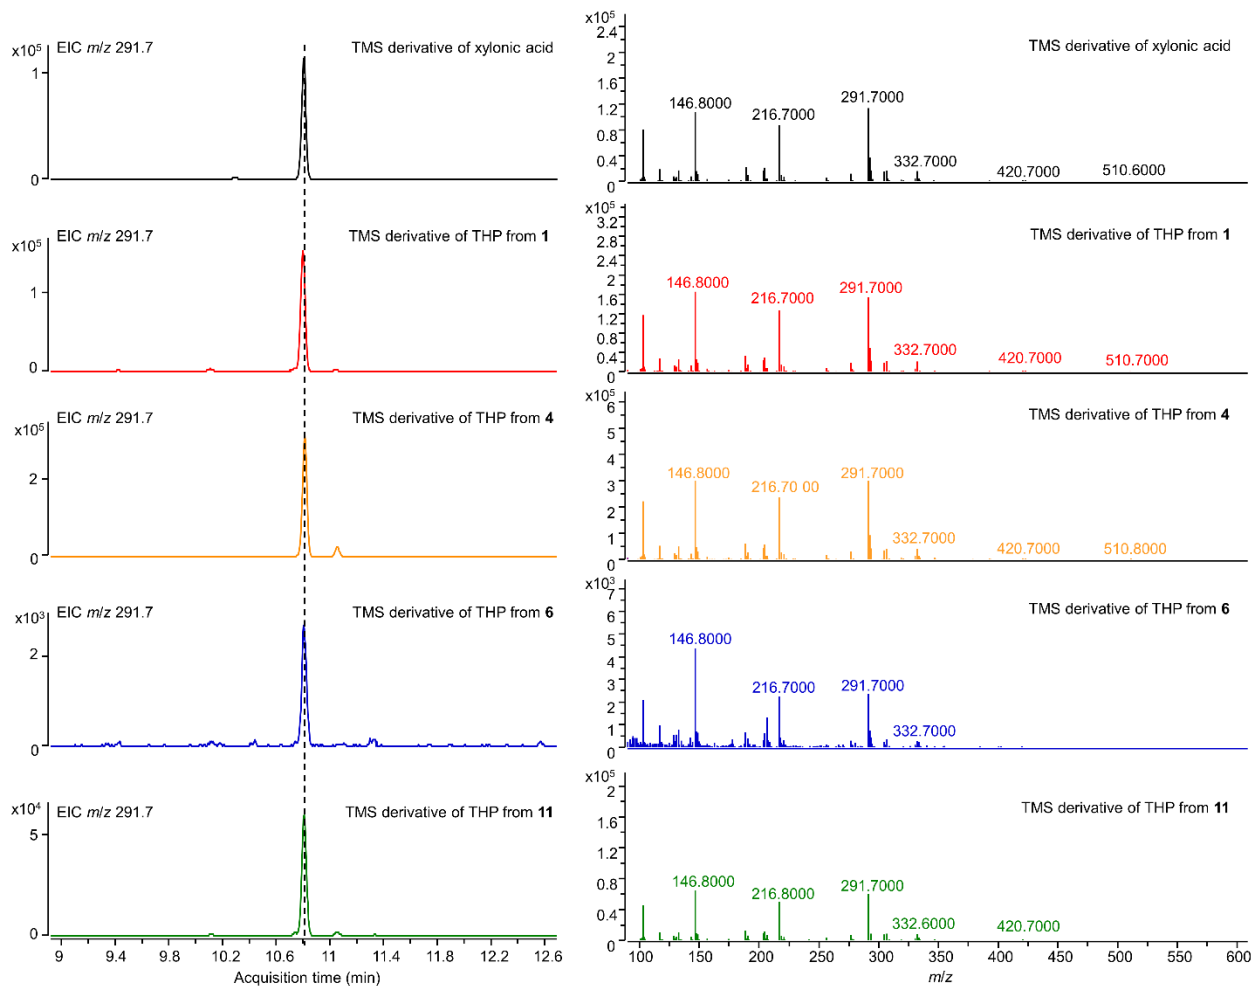

**Figure S16. Comparison of the GC-EIMS spectra of the TMS derivative of the xylonic acid standard and the TMS derivatives of the tetrahydroxybutanoic acid (THB) residues of compounds 1, 4, 6, and 11.**

Left panels: extracted ion chromatograms at  $m/z$  291.7 (the most abundant fragment ion of the TMS derivative of authentic xylonic acid standard) recorded in the positive mode; right panels: mass spectra of the selected peaks at 10.8 min.

**Figure S17. HRESIMS spectra.**

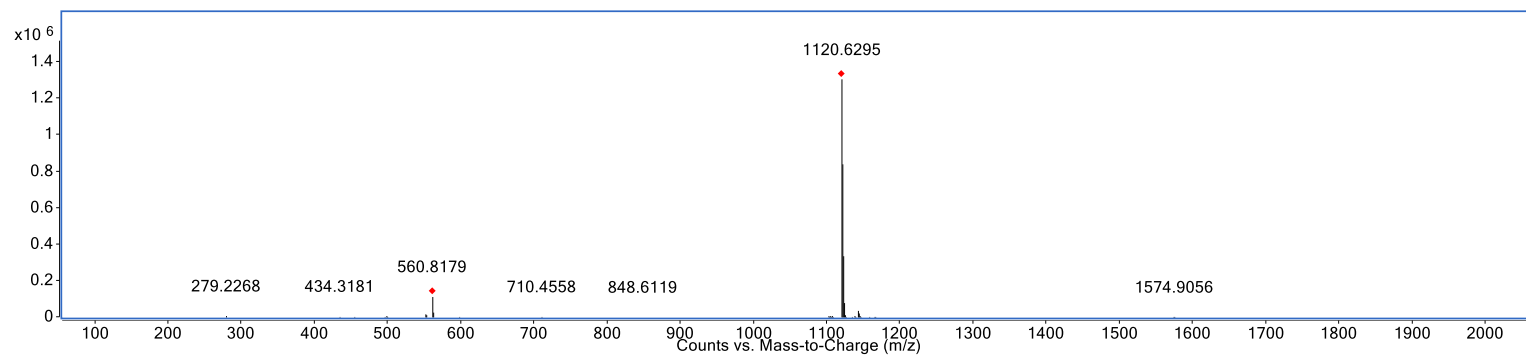

**Figure S17.1. (+)-HRESIMS spectrum of 1**

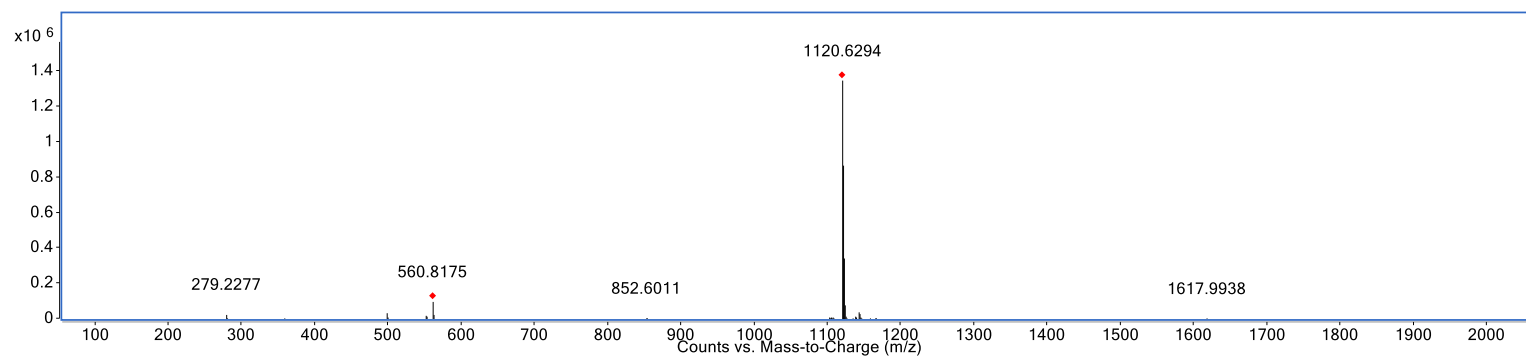

**Figure S17.2. (+)-HRESIMS spectrum of 2**

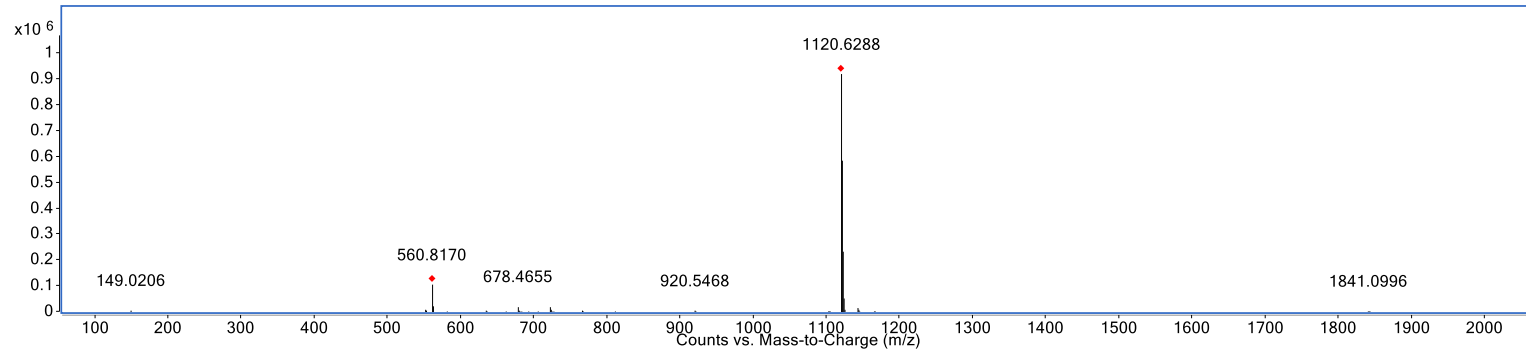

Figure S17.3. (+)-HRESIMS spectrum of 3

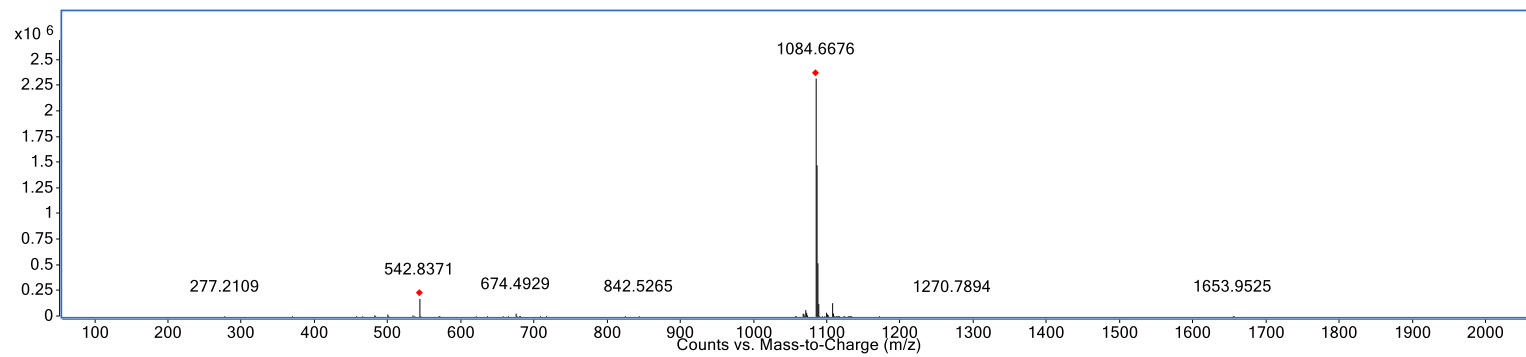

Figure S17.4. (+)-HRESIMS spectrum of 4



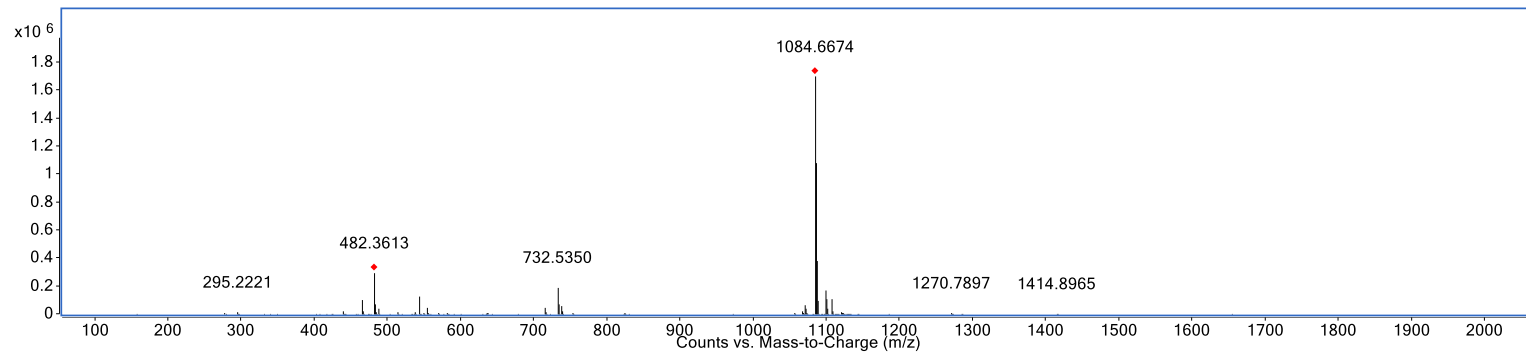

Figure S17.5. (+)-HRESIMS spectrum of M1

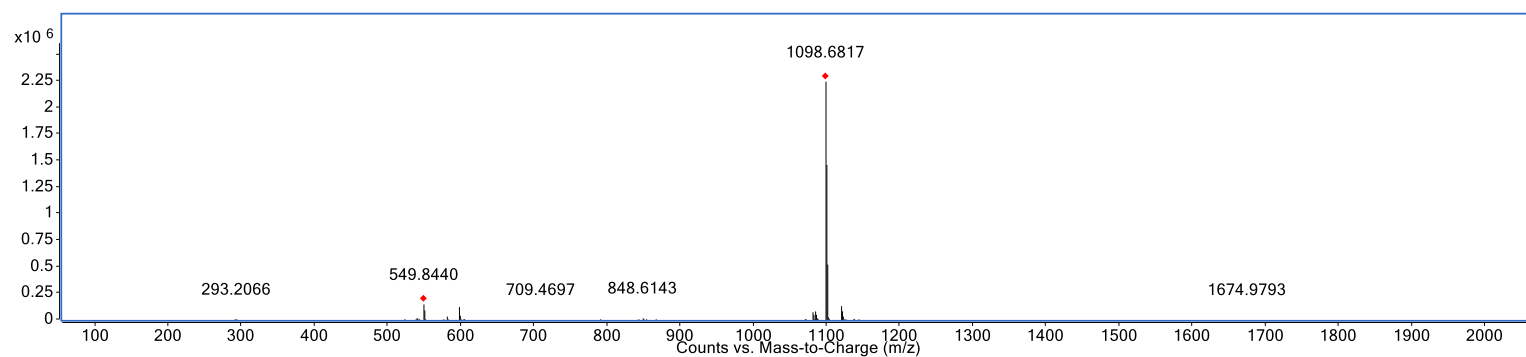

Figure S17.6. (+)-HRESIMS spectrum of M2

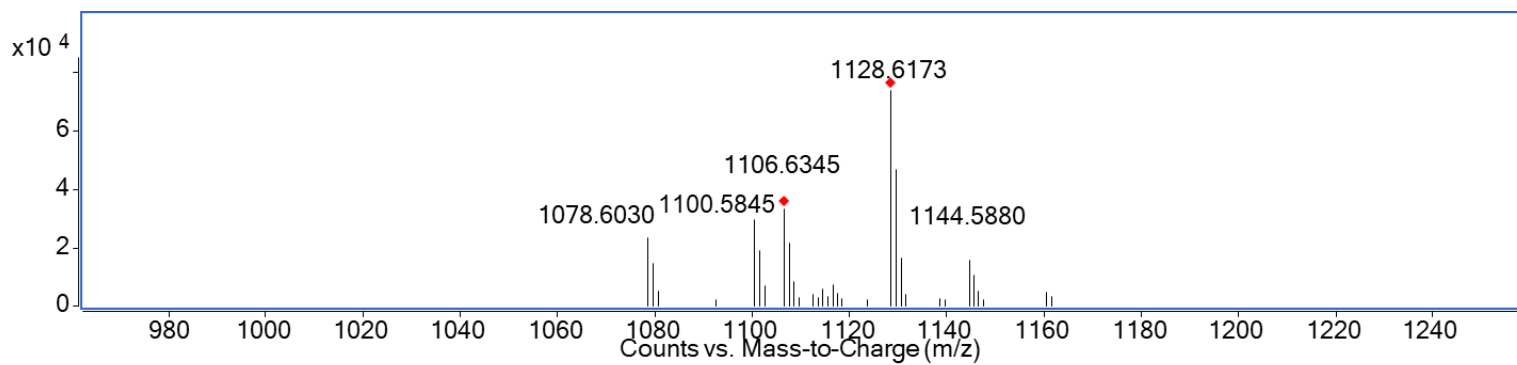

Figure S17.7. (+)-HRESIMS spectrum of the mixture of 5 and 10

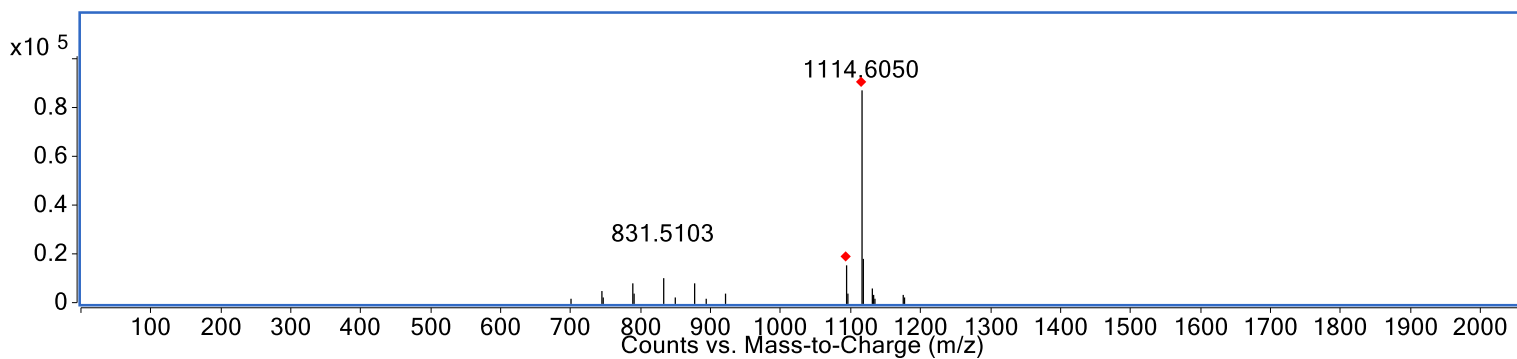

Figure S17.8. (+)-HRESIMS spectrum of 6

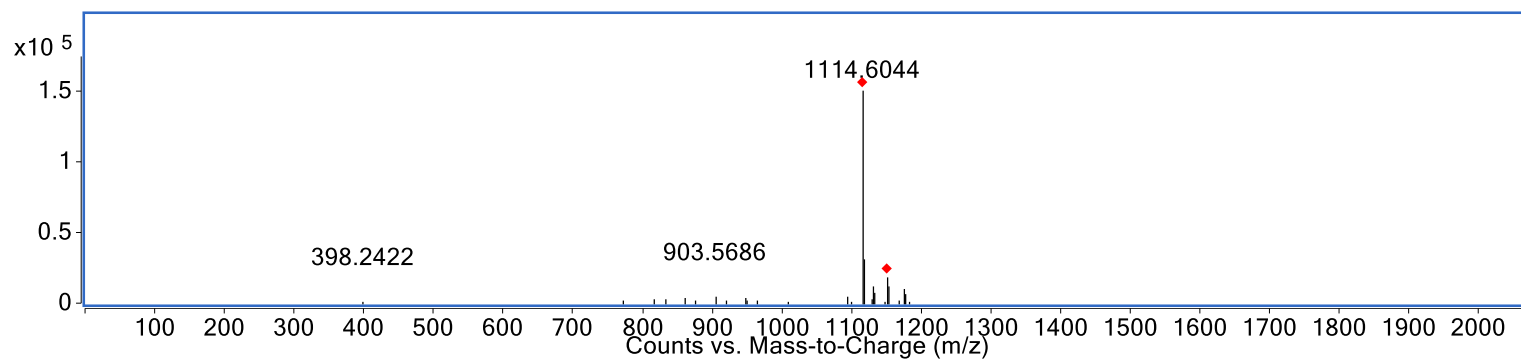

Figure S17.9. (+)-HRESIMS spectrum of 7

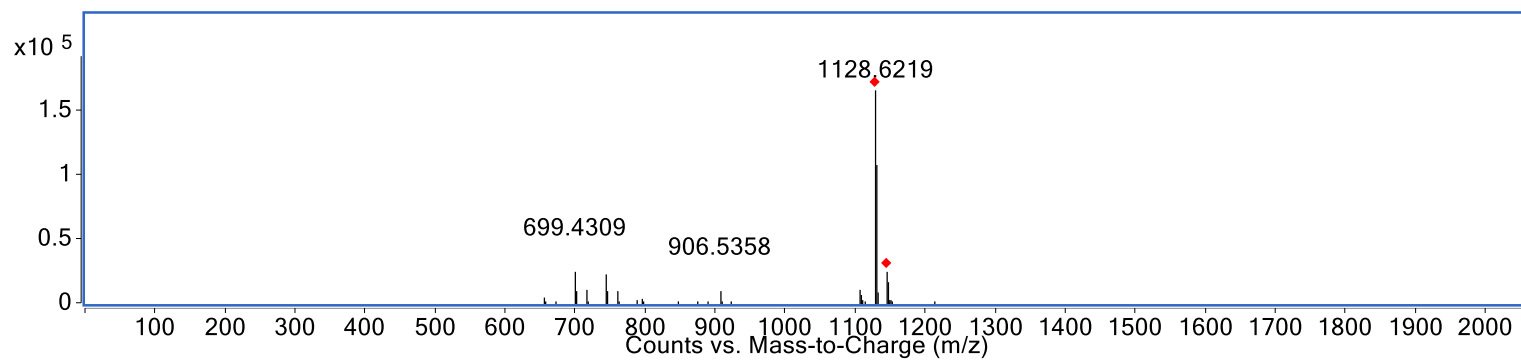

Figure S17.10. (+)-HRESIMS spectrum of 8

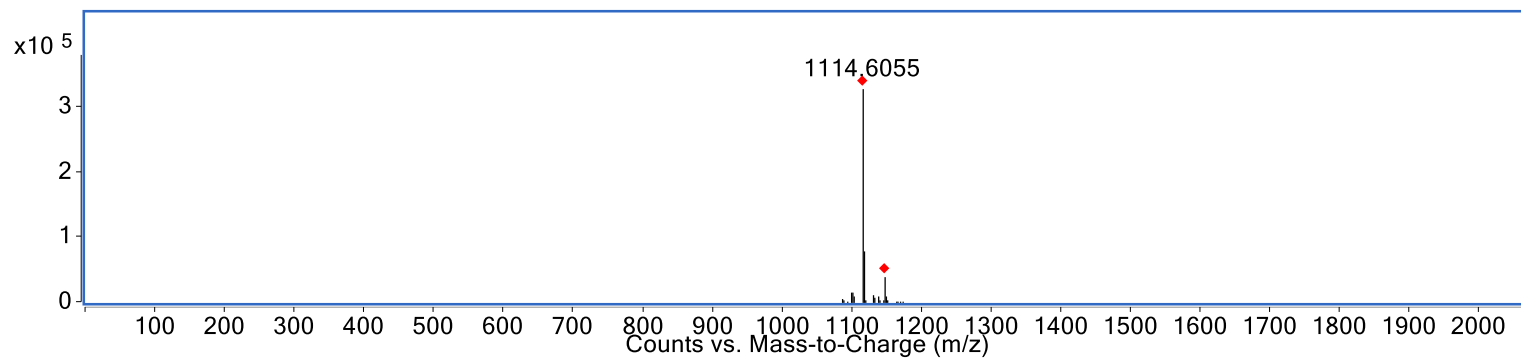

Figure S17.11. (+)-HRESIMS spectrum of **9**

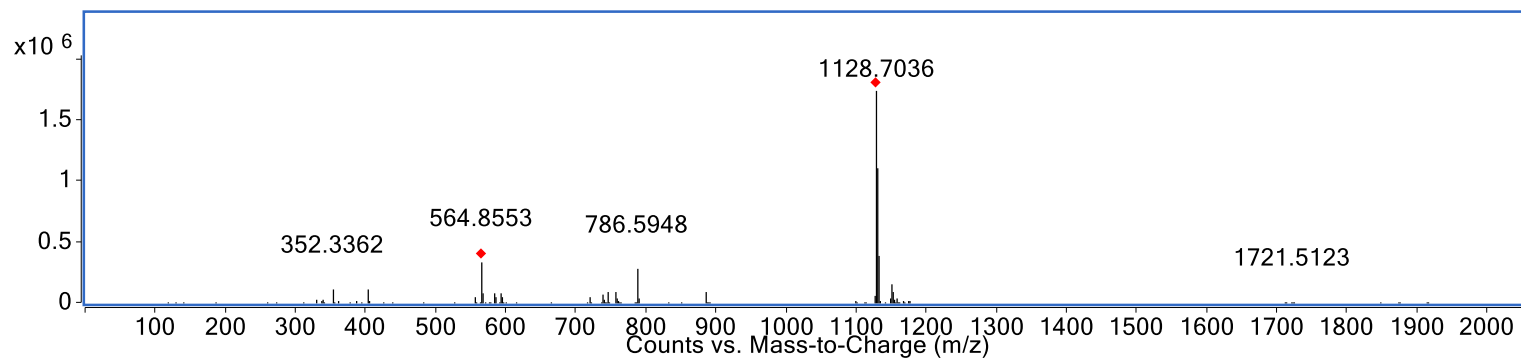

Figure S17.12. (+)-HRESIMS spectrum of **11**

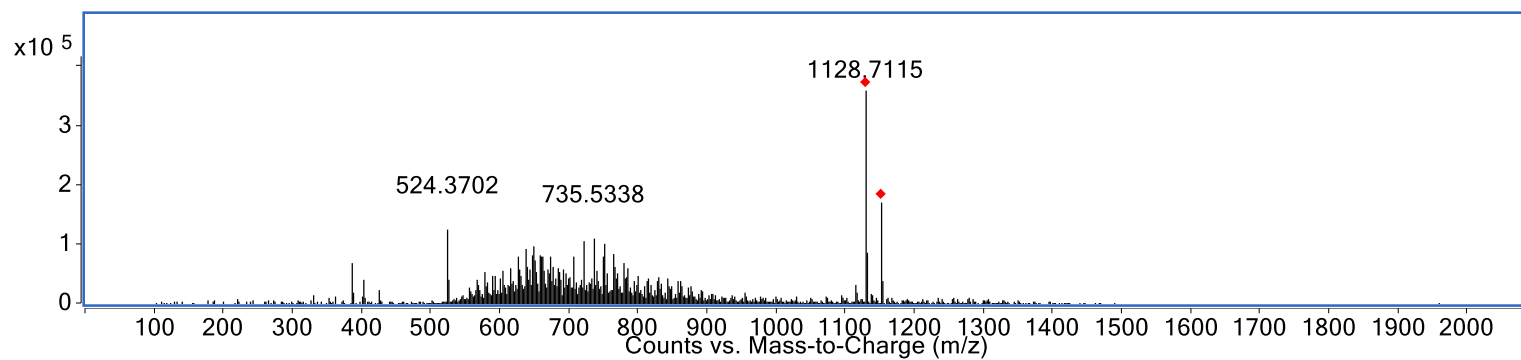

**Figure S17.13.** (+)-HRESIMS spectrum of **12**

Figure S18. NMR spectra

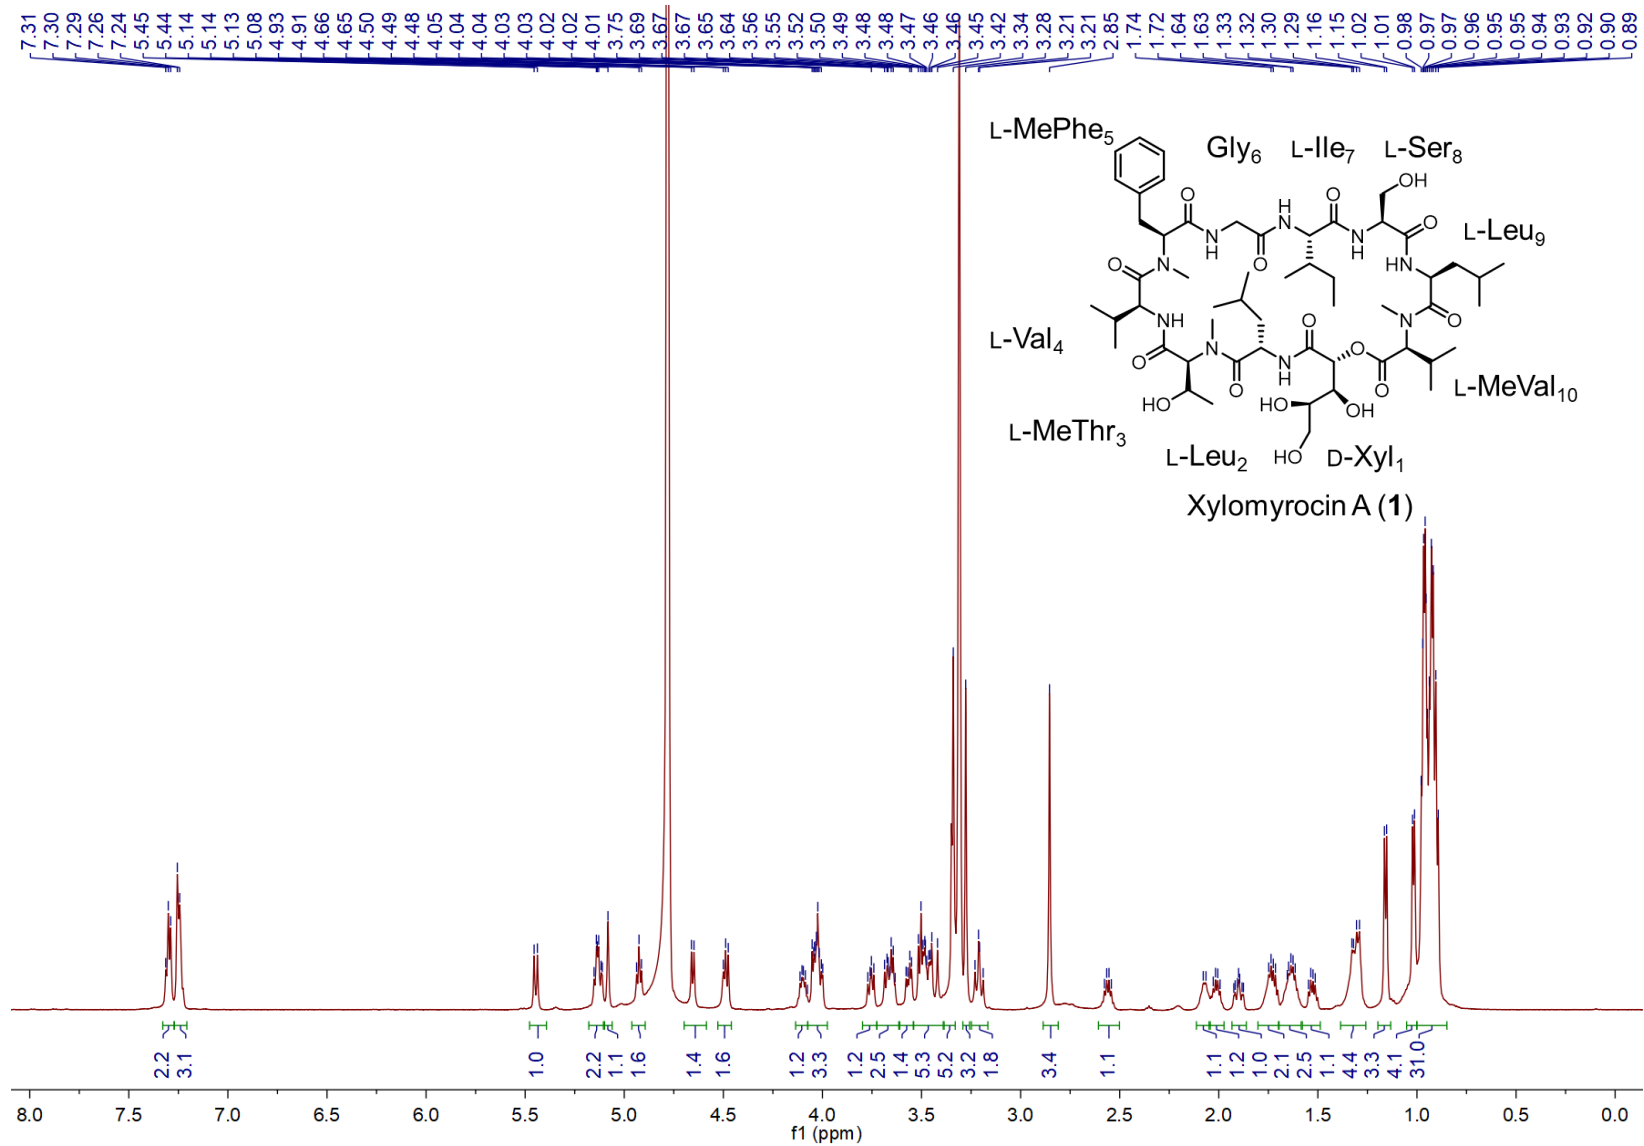

Figure S18.1.  $^1\text{H}$  NMR spectrum of 1 in  $\text{methanol-}d_4$

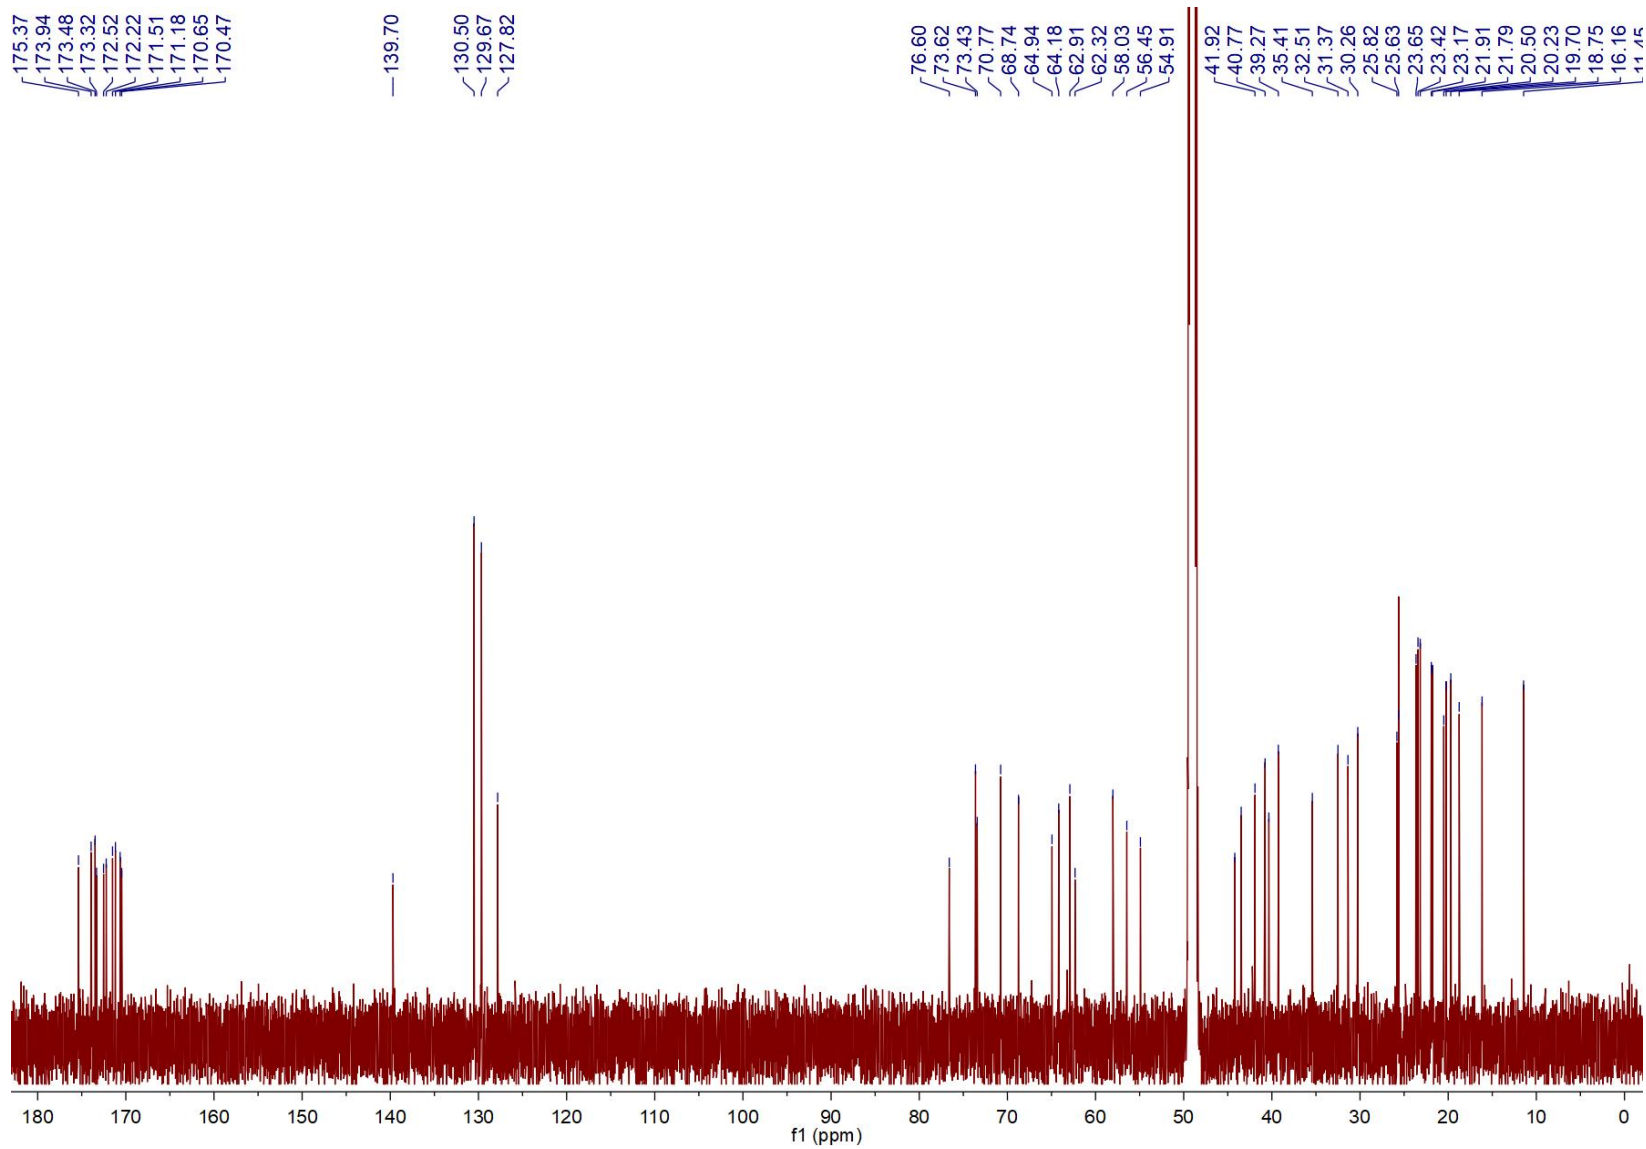

Figure S18.2.  $^{13}\text{C}$  NMR spectrum of 1 in methanol- $d_4$

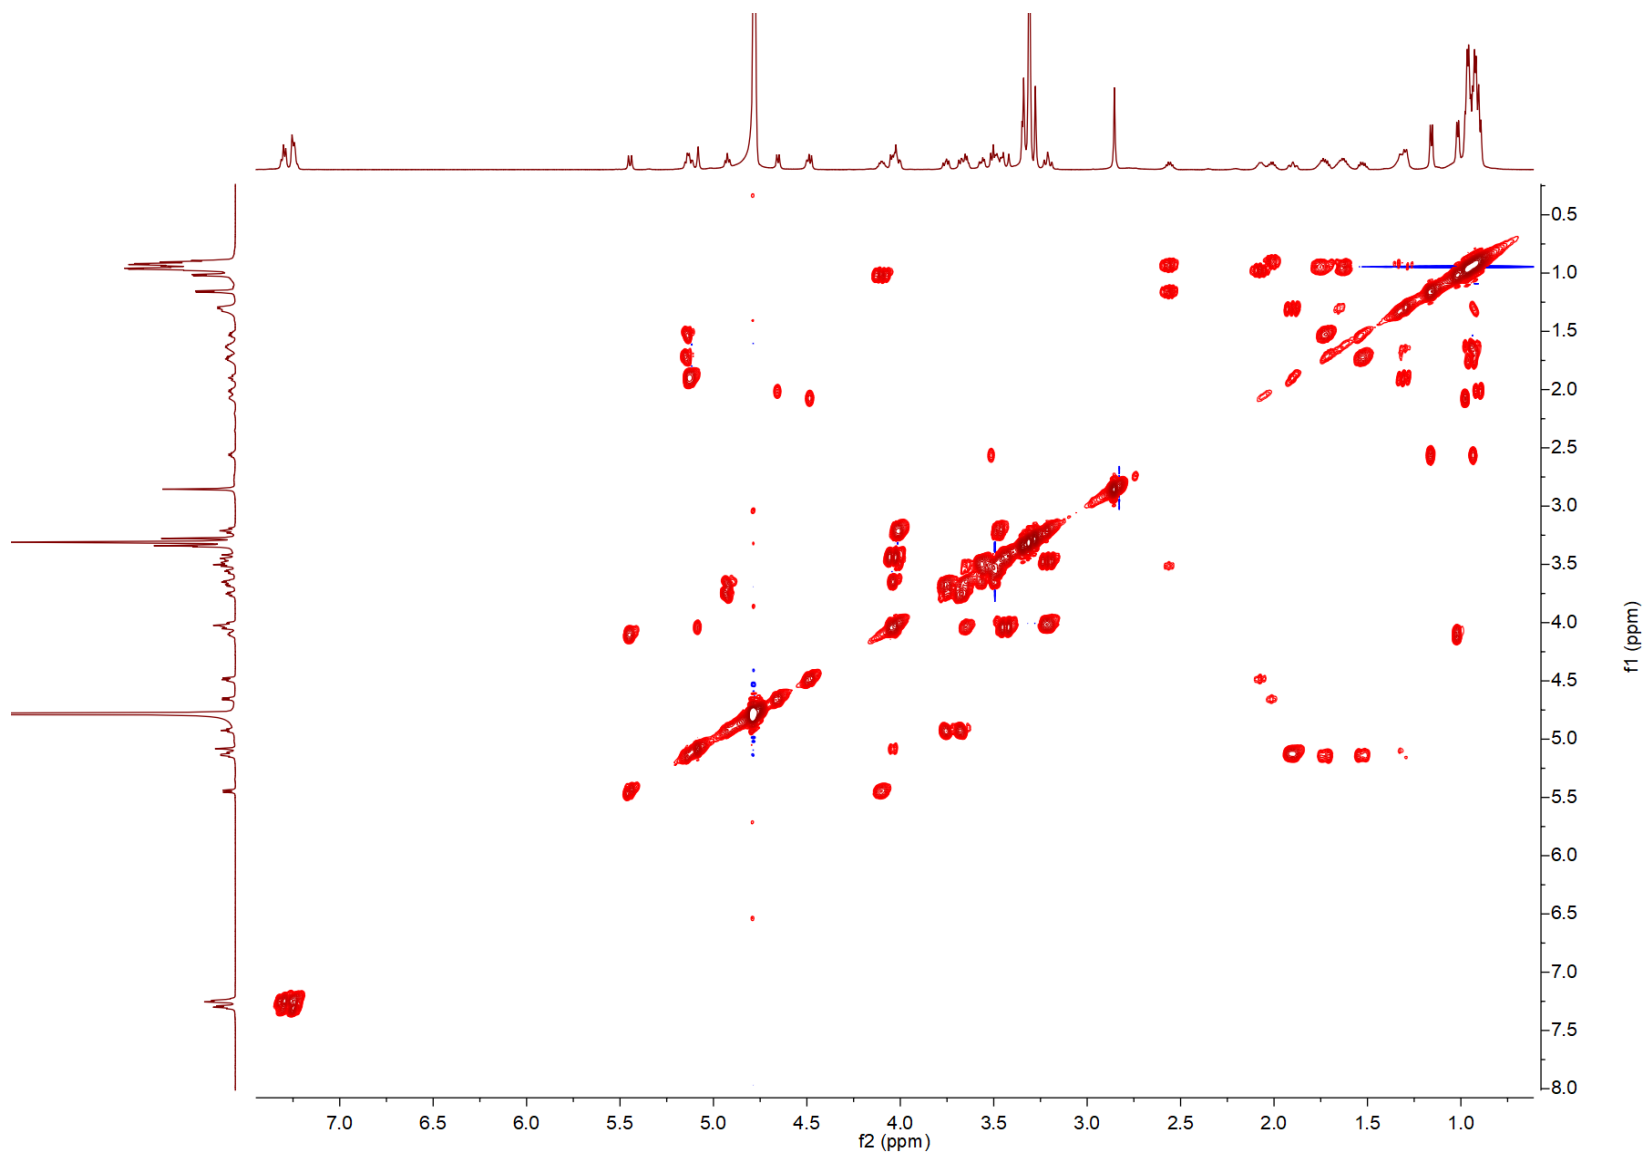

Figure S18.3.  $^1\text{H}$ - $^1\text{H}$  COSY spectrum of 1 in methanol- $d_4$



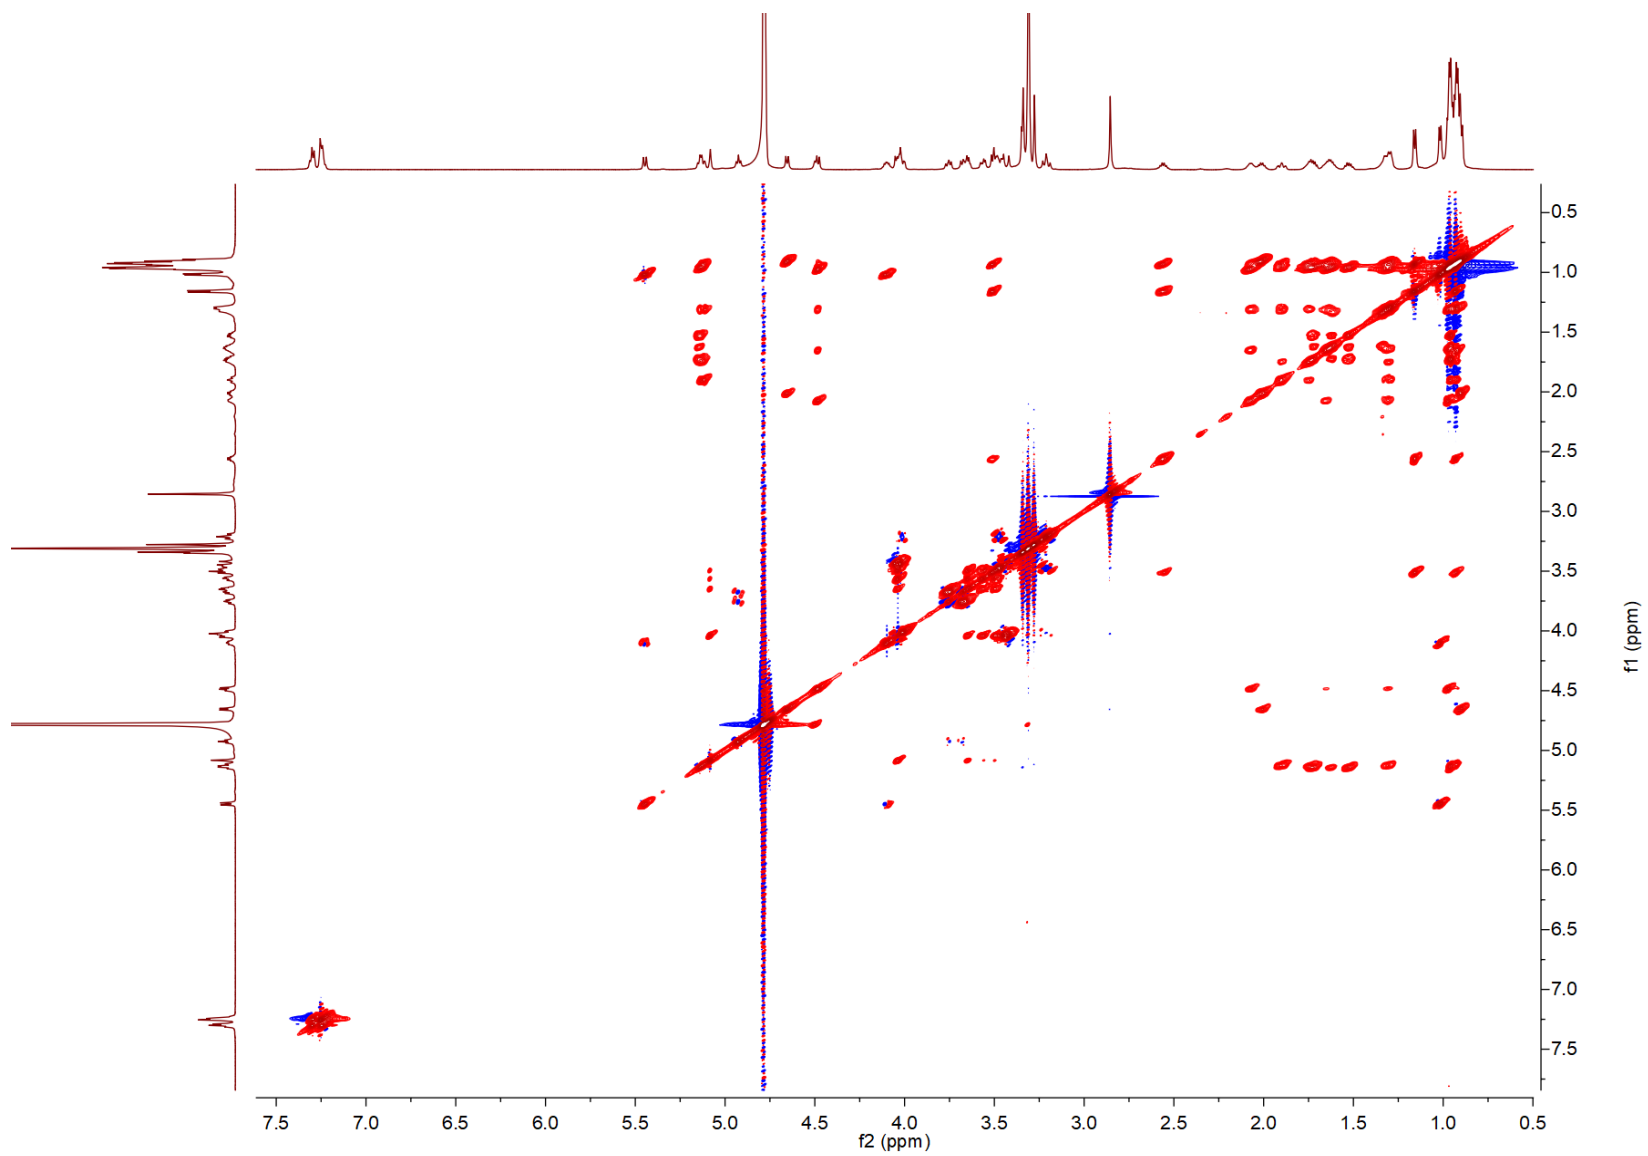

Figure S18.4.  $^1\text{H}$ - $^1\text{H}$  TOCSY spectrum of **1** in methanol- $d_4$

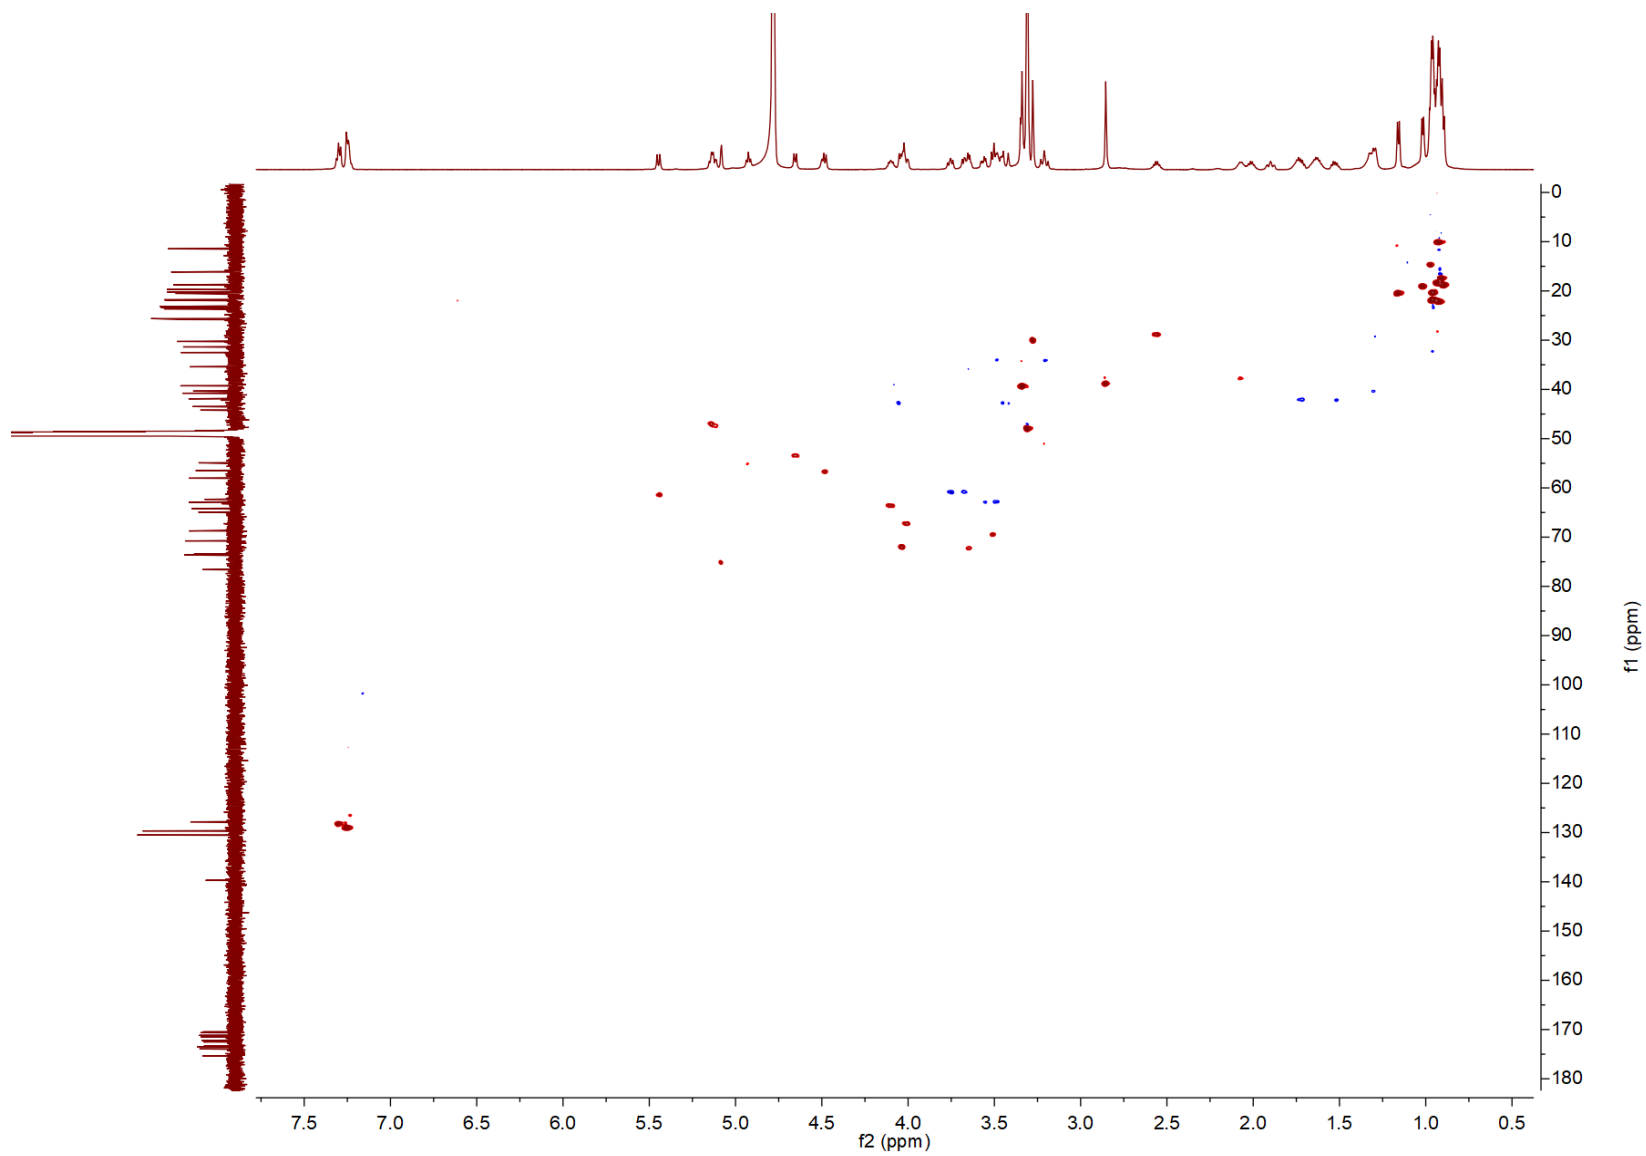

Figure S18.5. HSQC spectrum of 1 in methanol- $d_4$

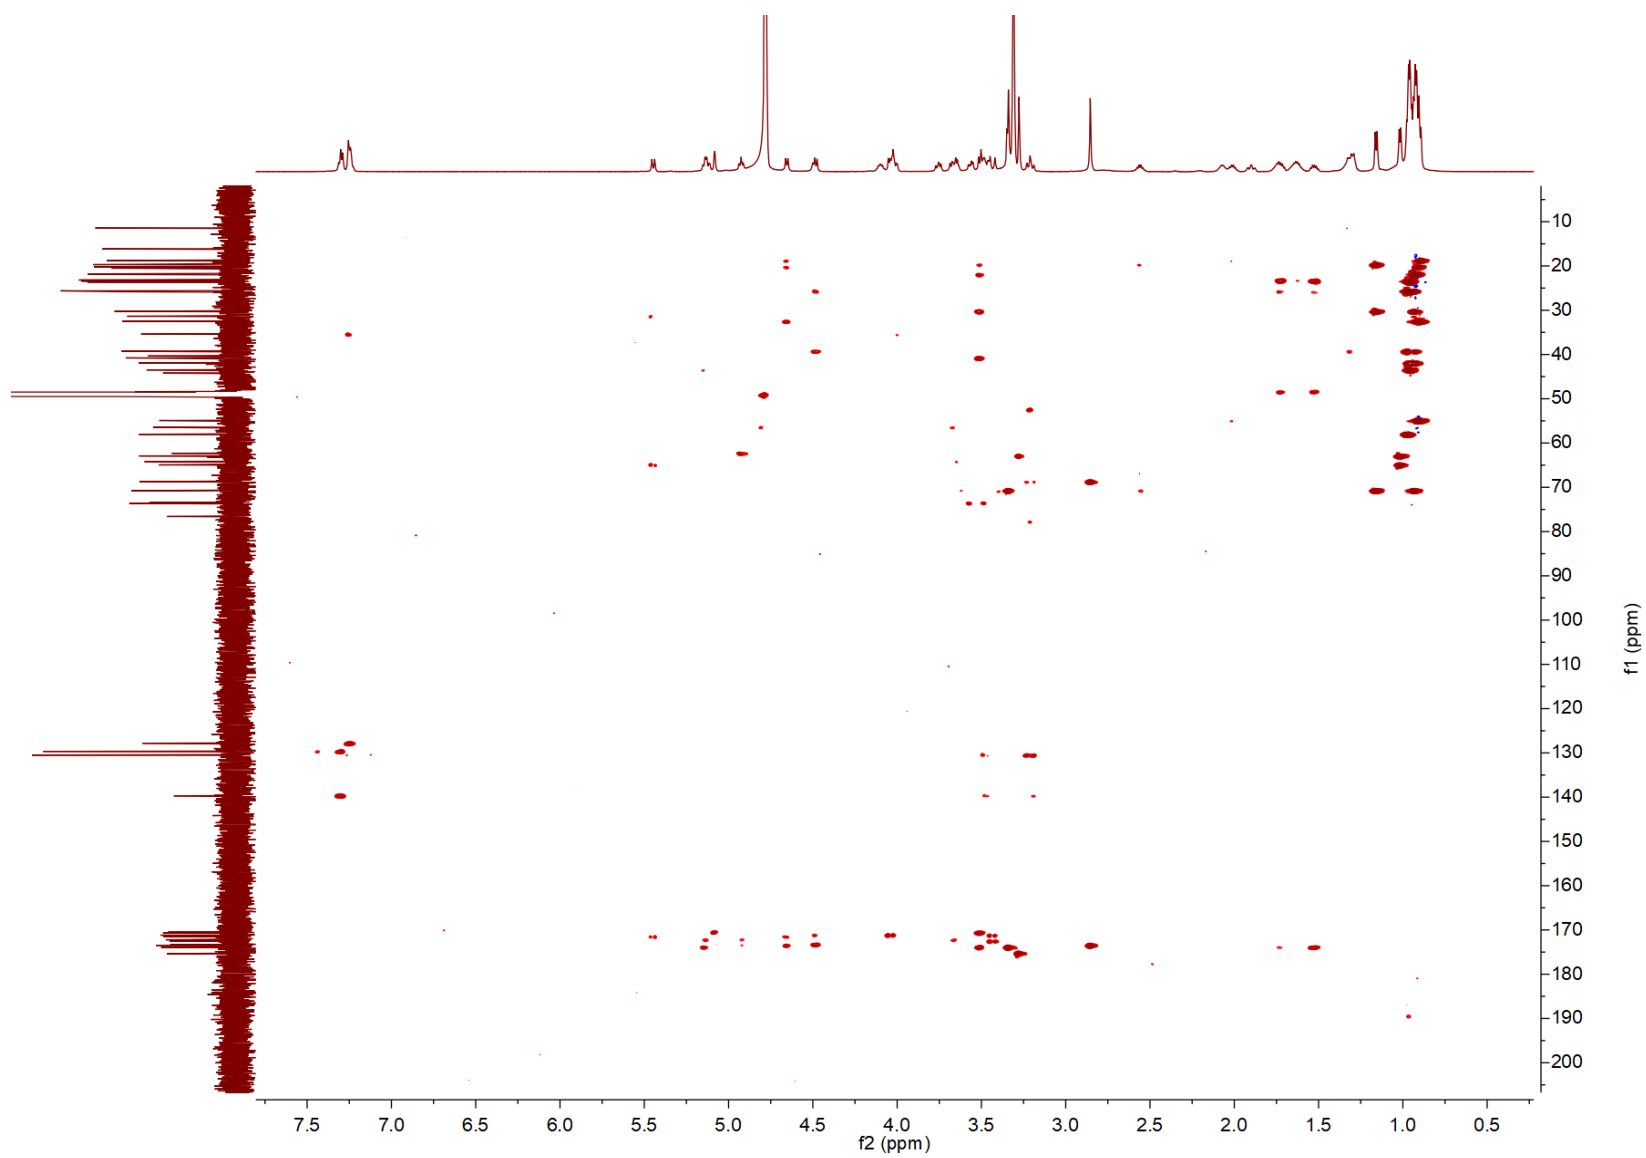

Figure S18.6. HMBC spectrum of 1 in methanol- $d_4$

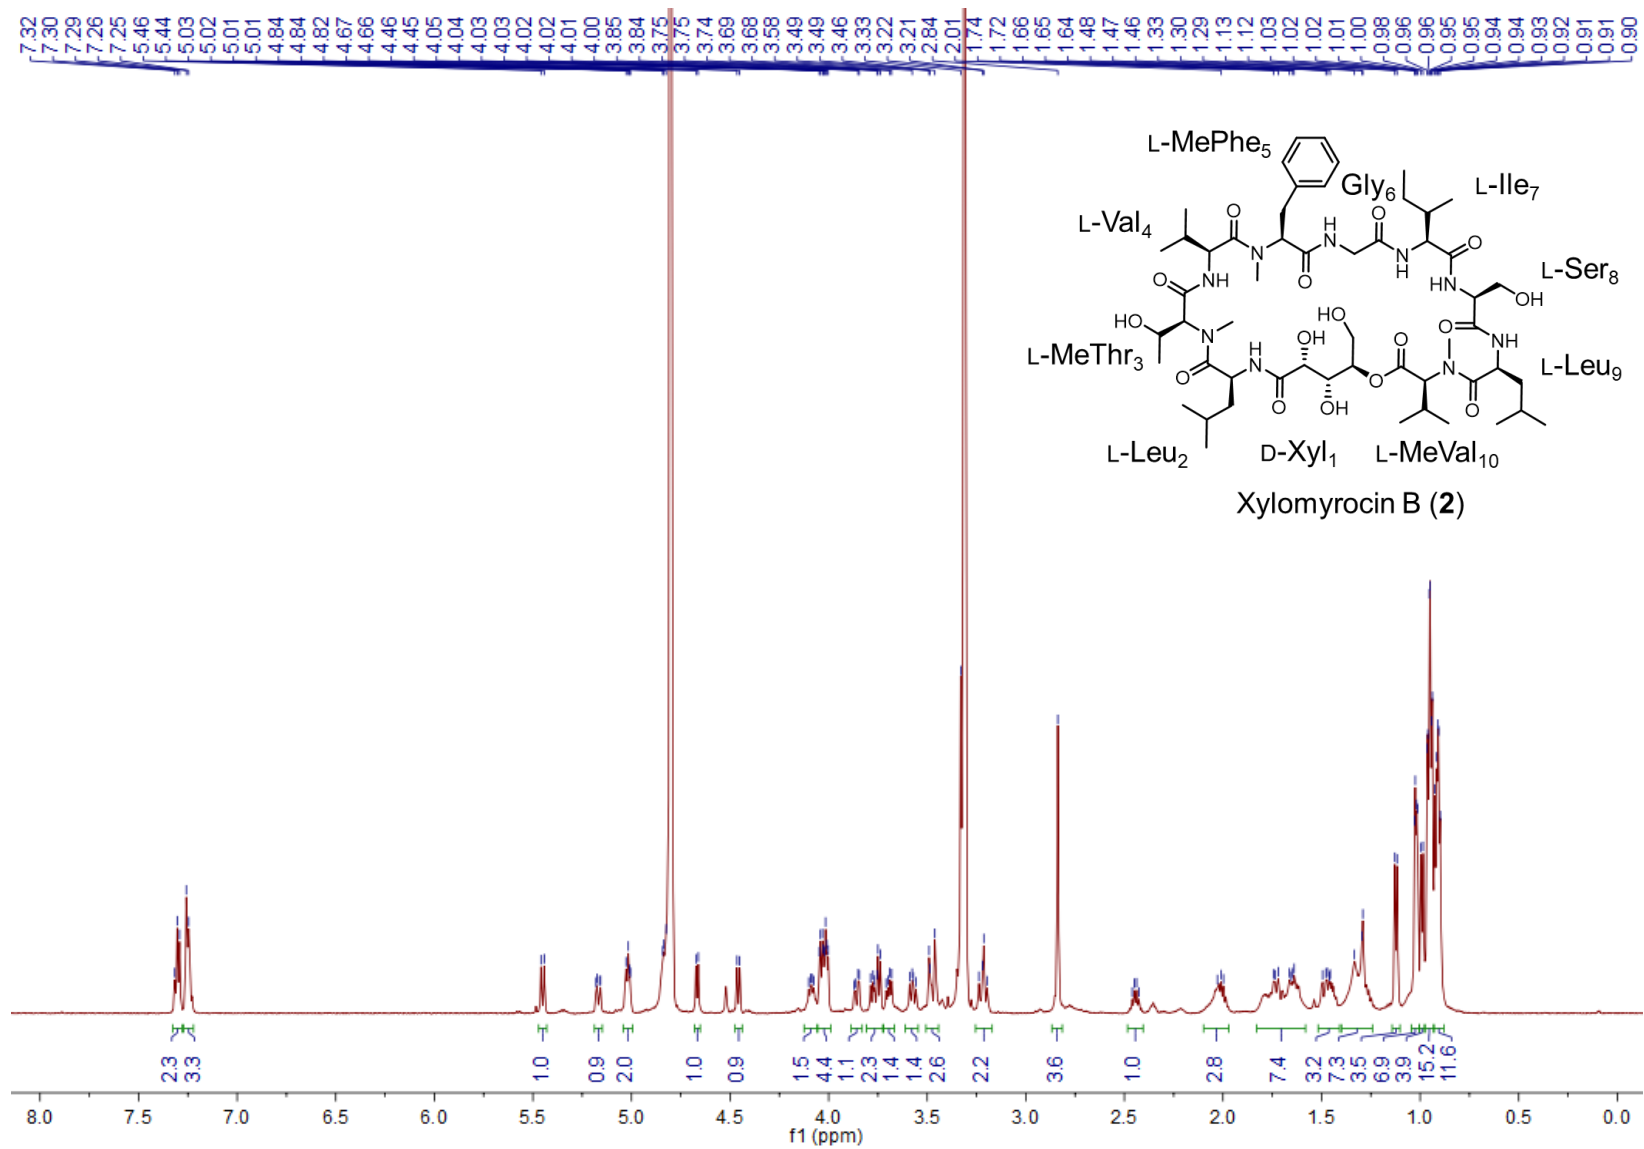

Figure S18.7.  $^1\text{H}$  NMR spectrum of 2 in methanol- $d_4$

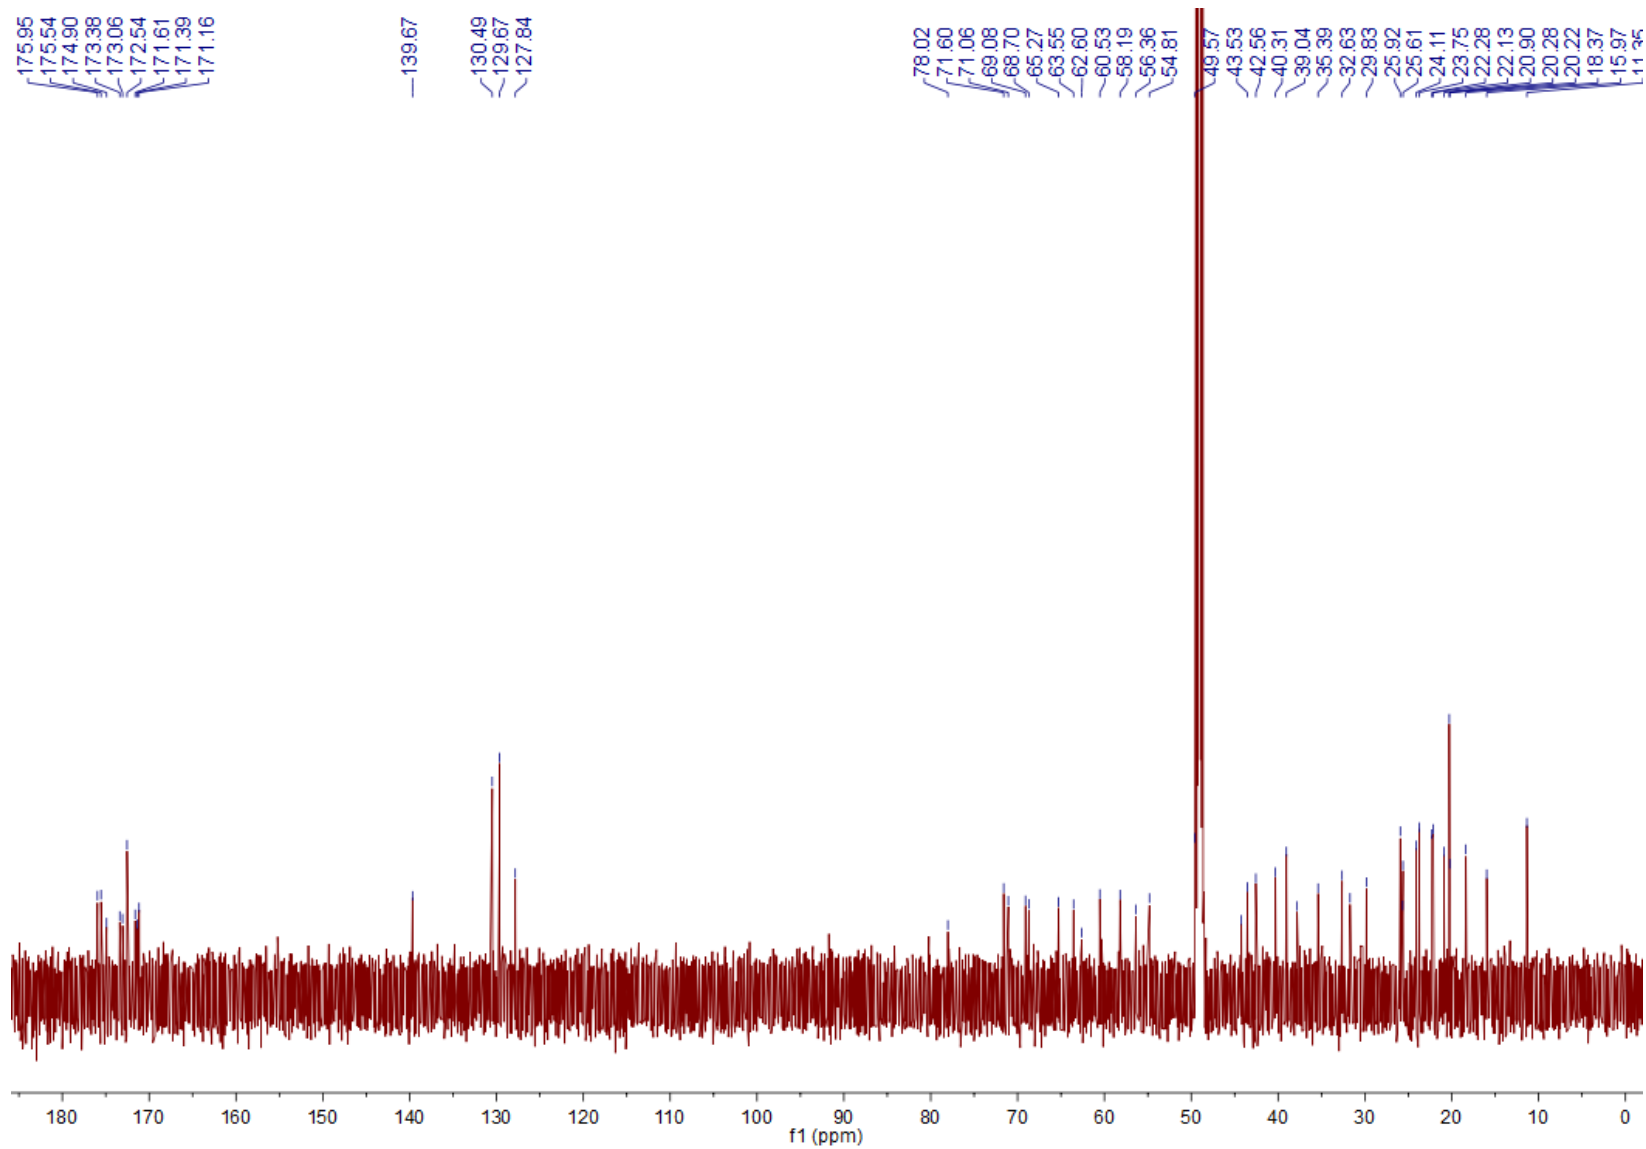

Figure S18.8.  $^{13}\text{C}$  NMR spectrum of 2 in methanol- $d_4$

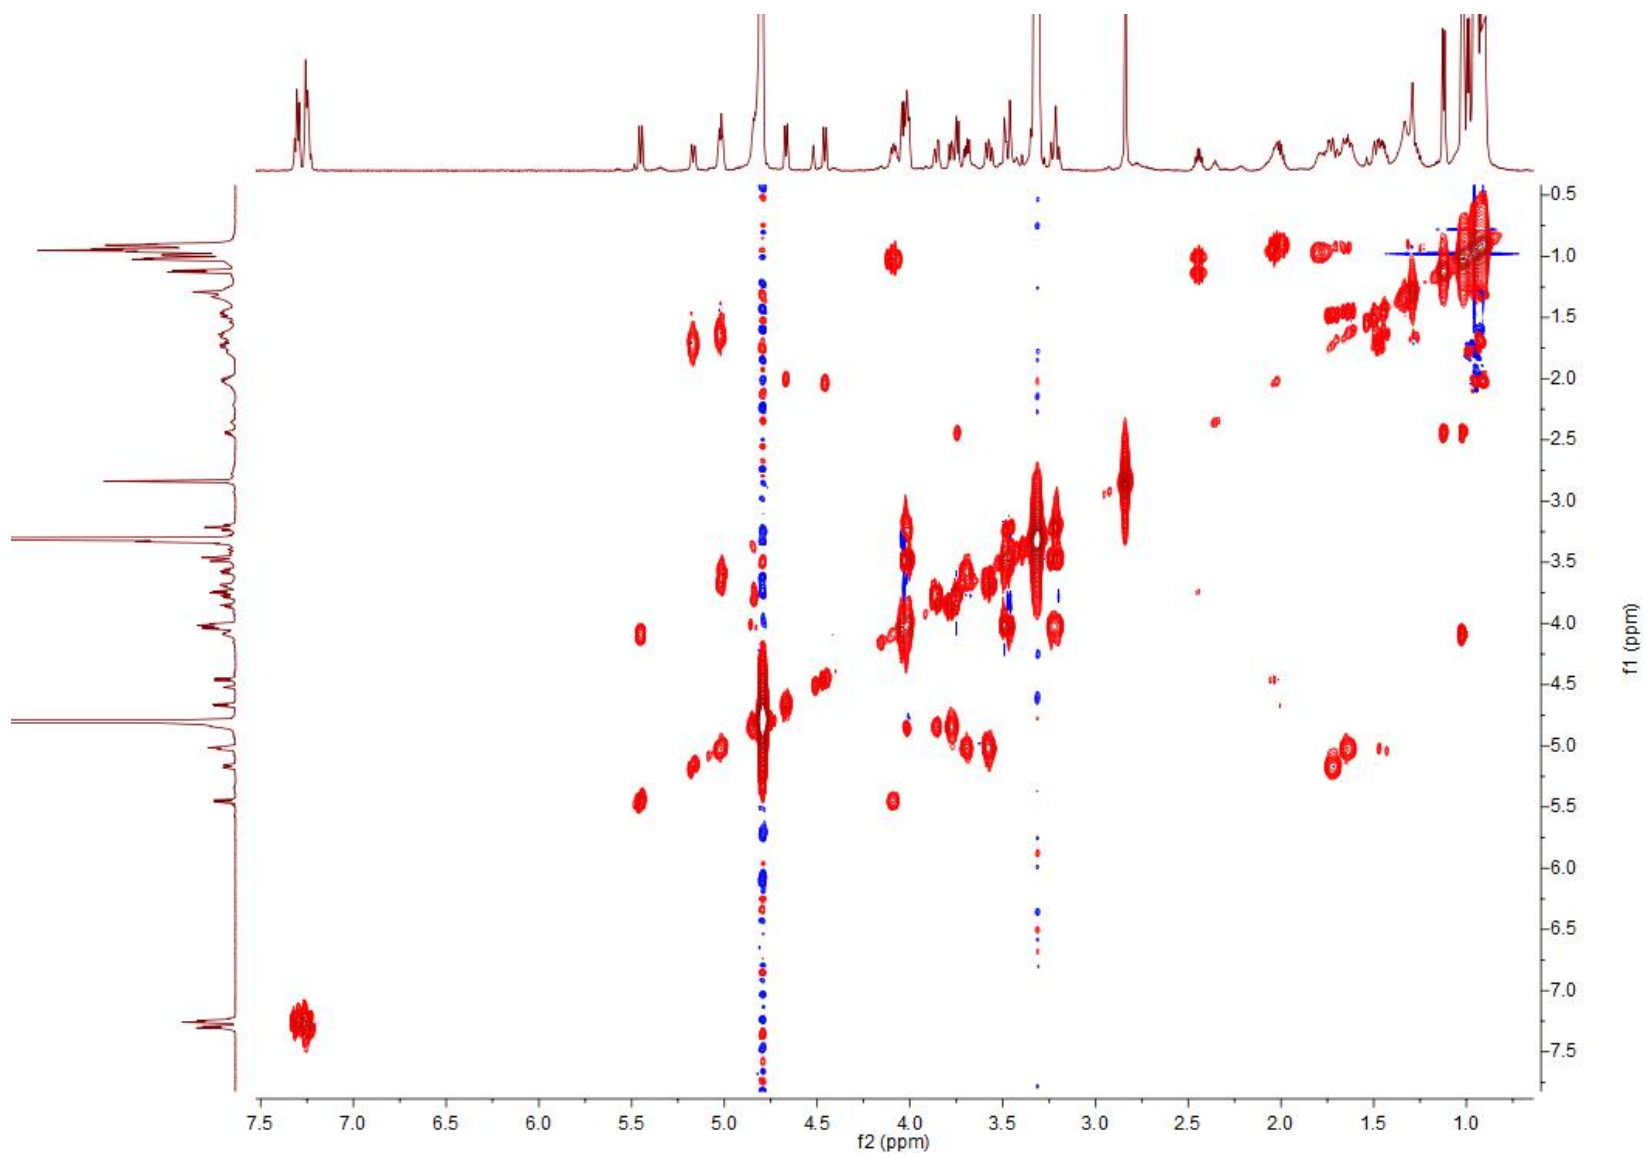

Figure S18.9.  $^1\text{H}$ - $^1\text{H}$  COSY spectrum of 2 in methanol- $d_4$

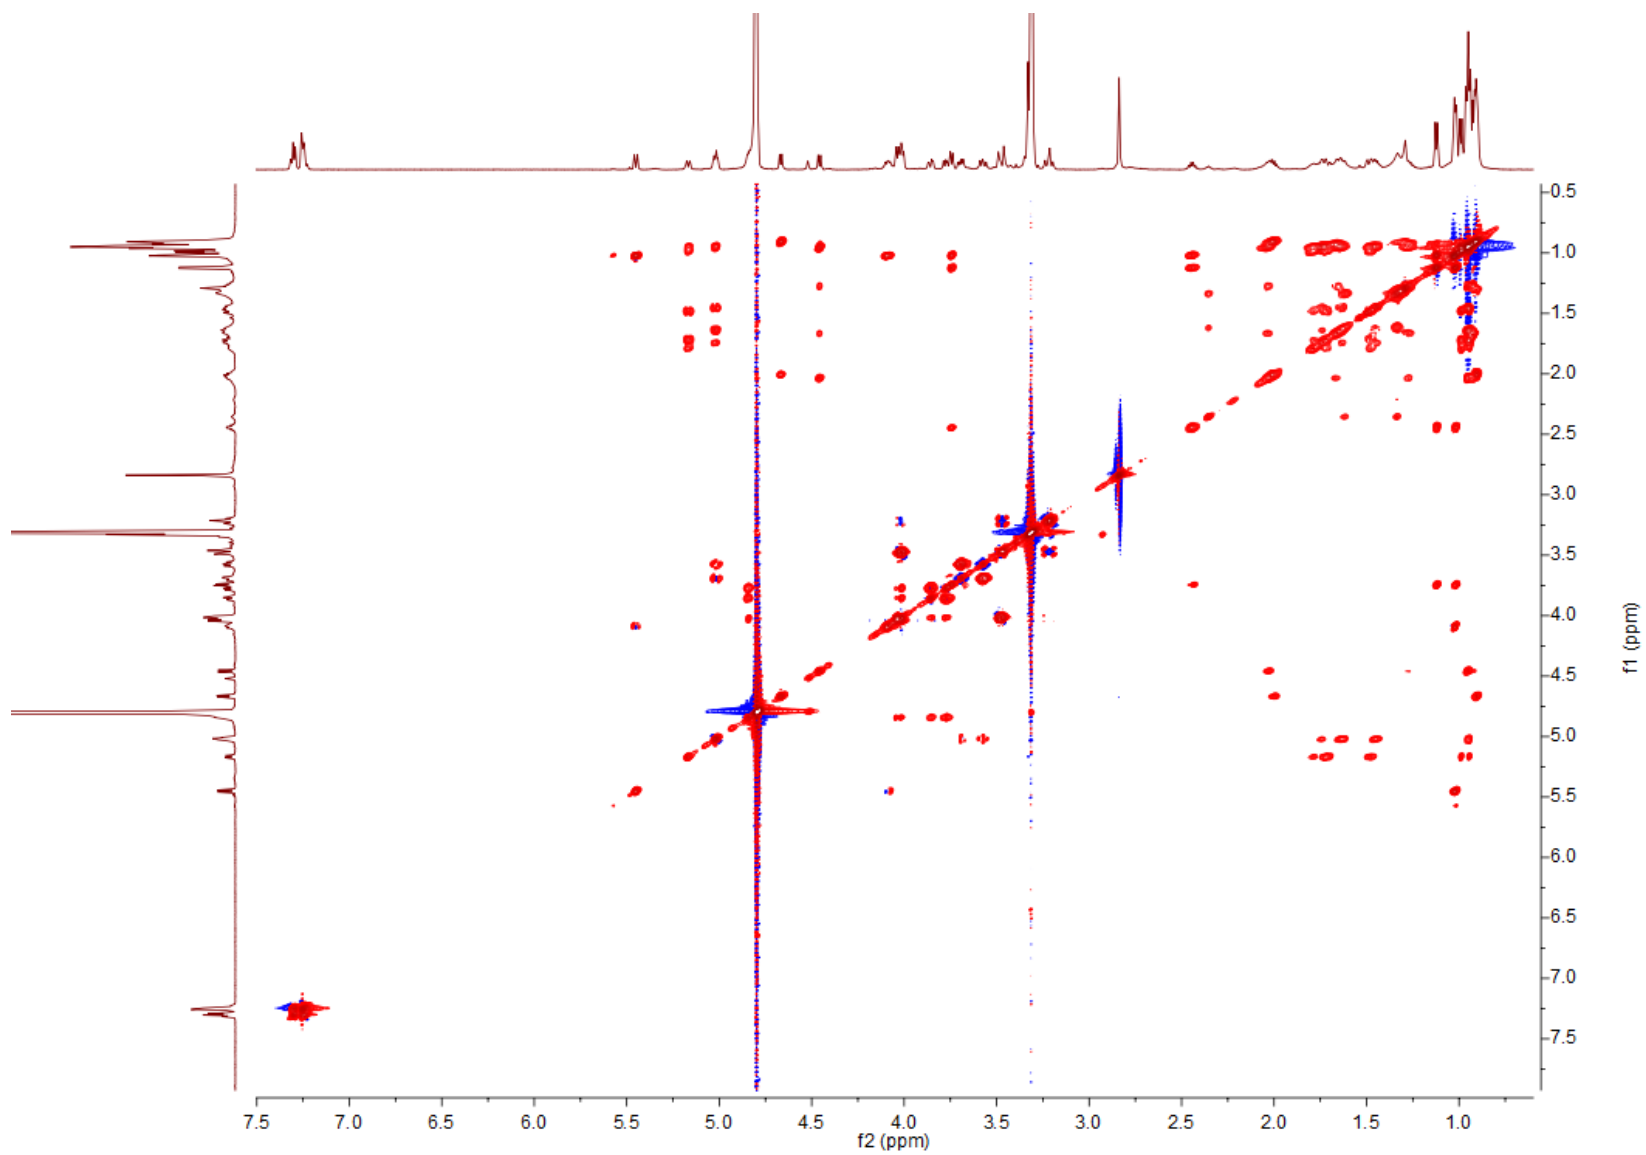

Figure S18.10.  $^1\text{H}$ - $^1\text{H}$  TOCSY spectrum of **2** in methanol- $d_4$

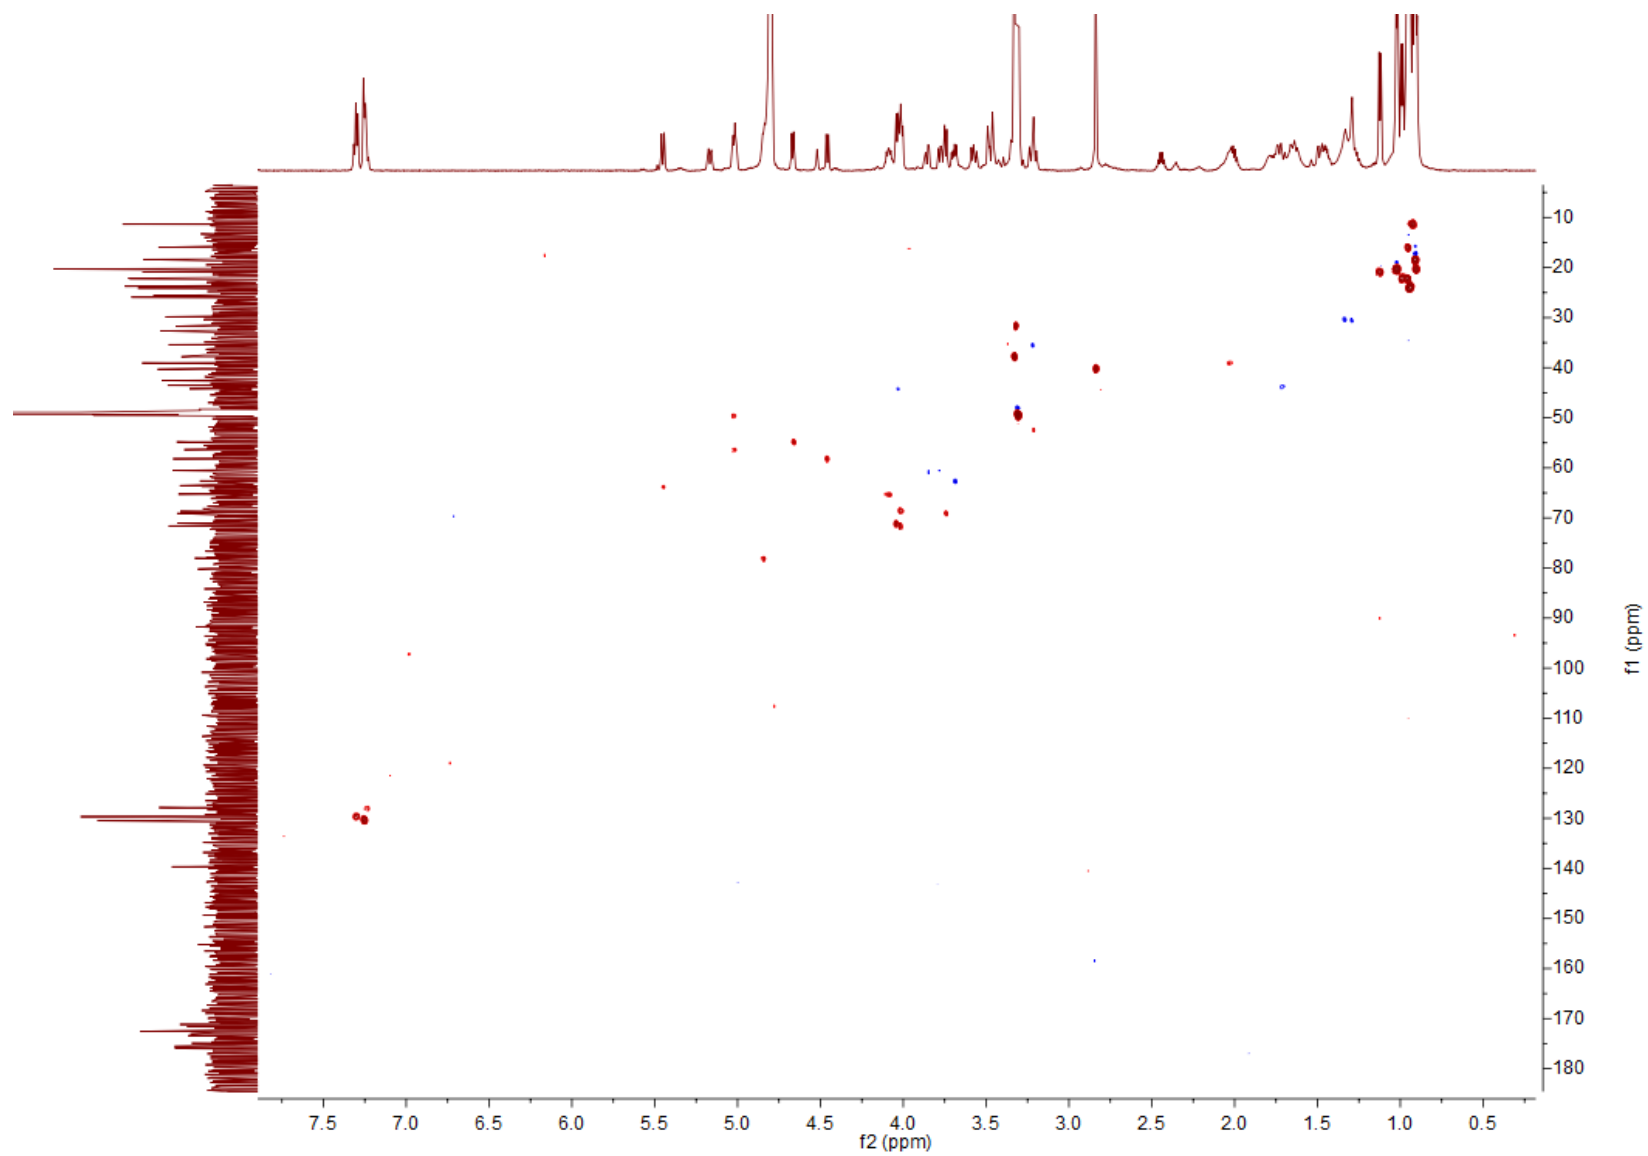

Figure S18.11. HSQC spectrum of 2 in methanol- $d_4$



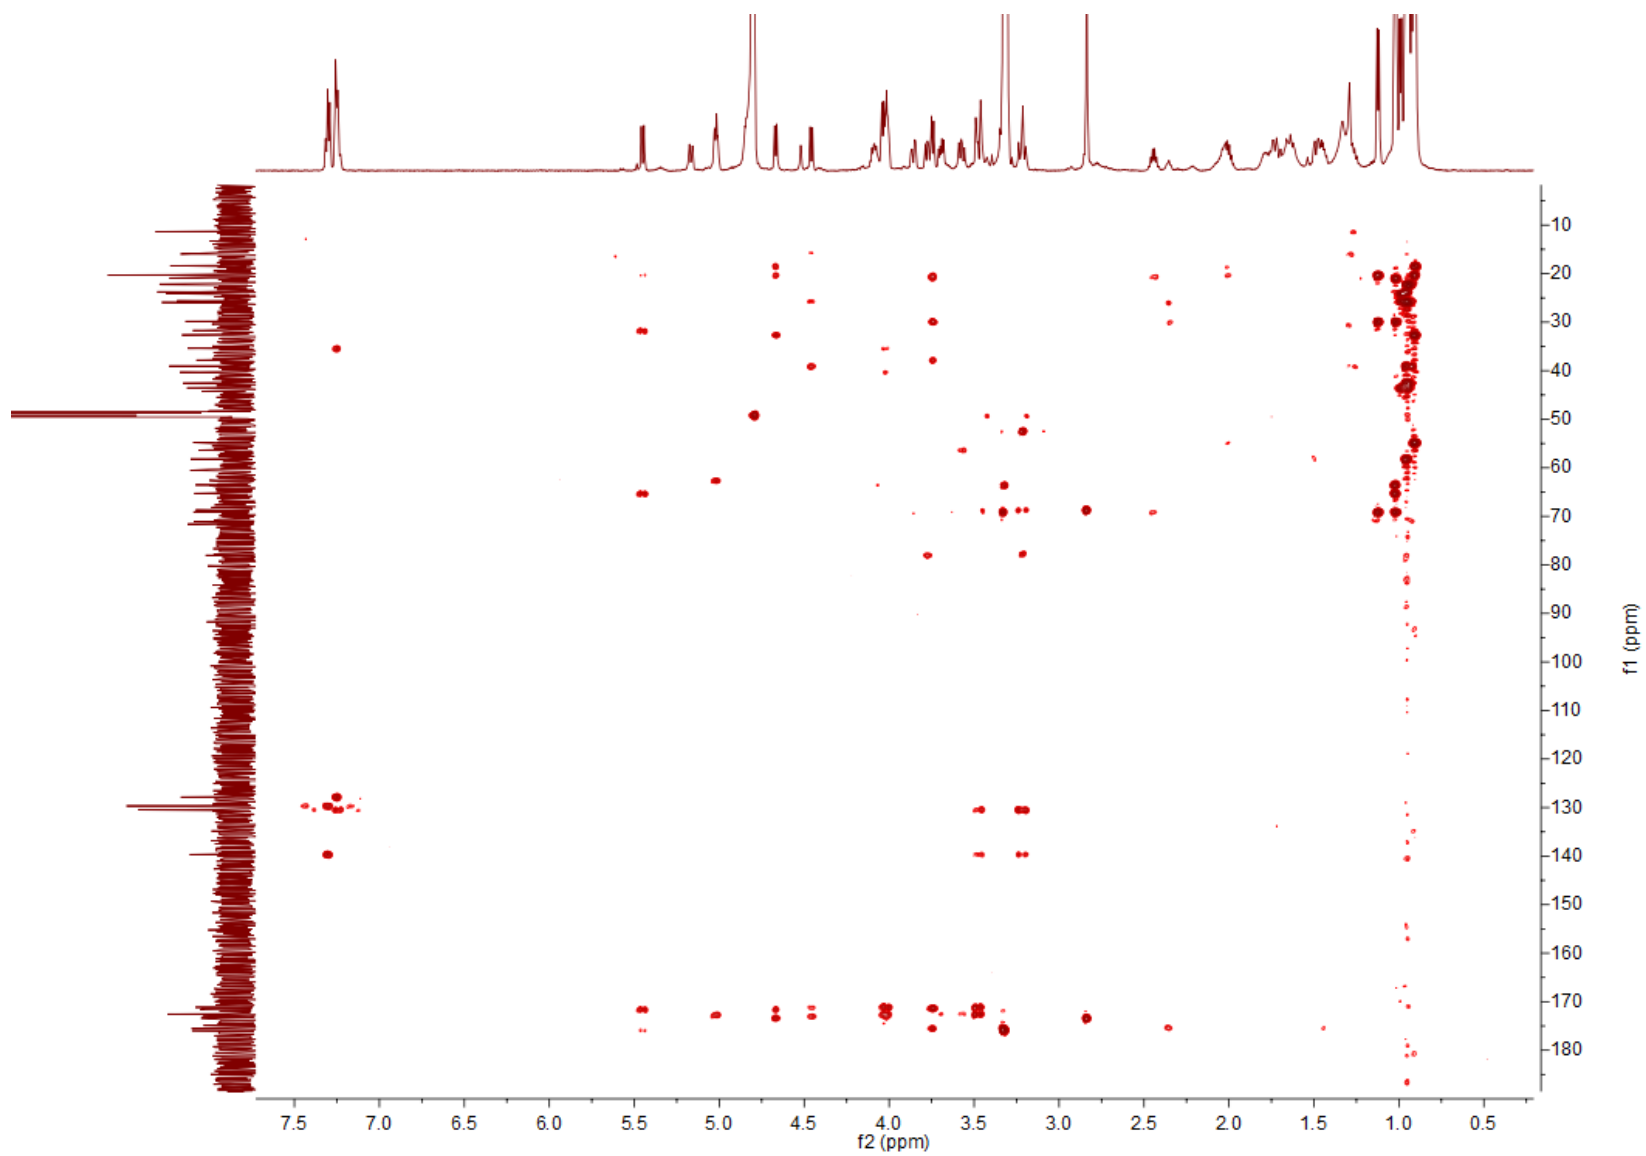

Figure S18.12. HMBC spectrum of 2 in methanol- $d_4$

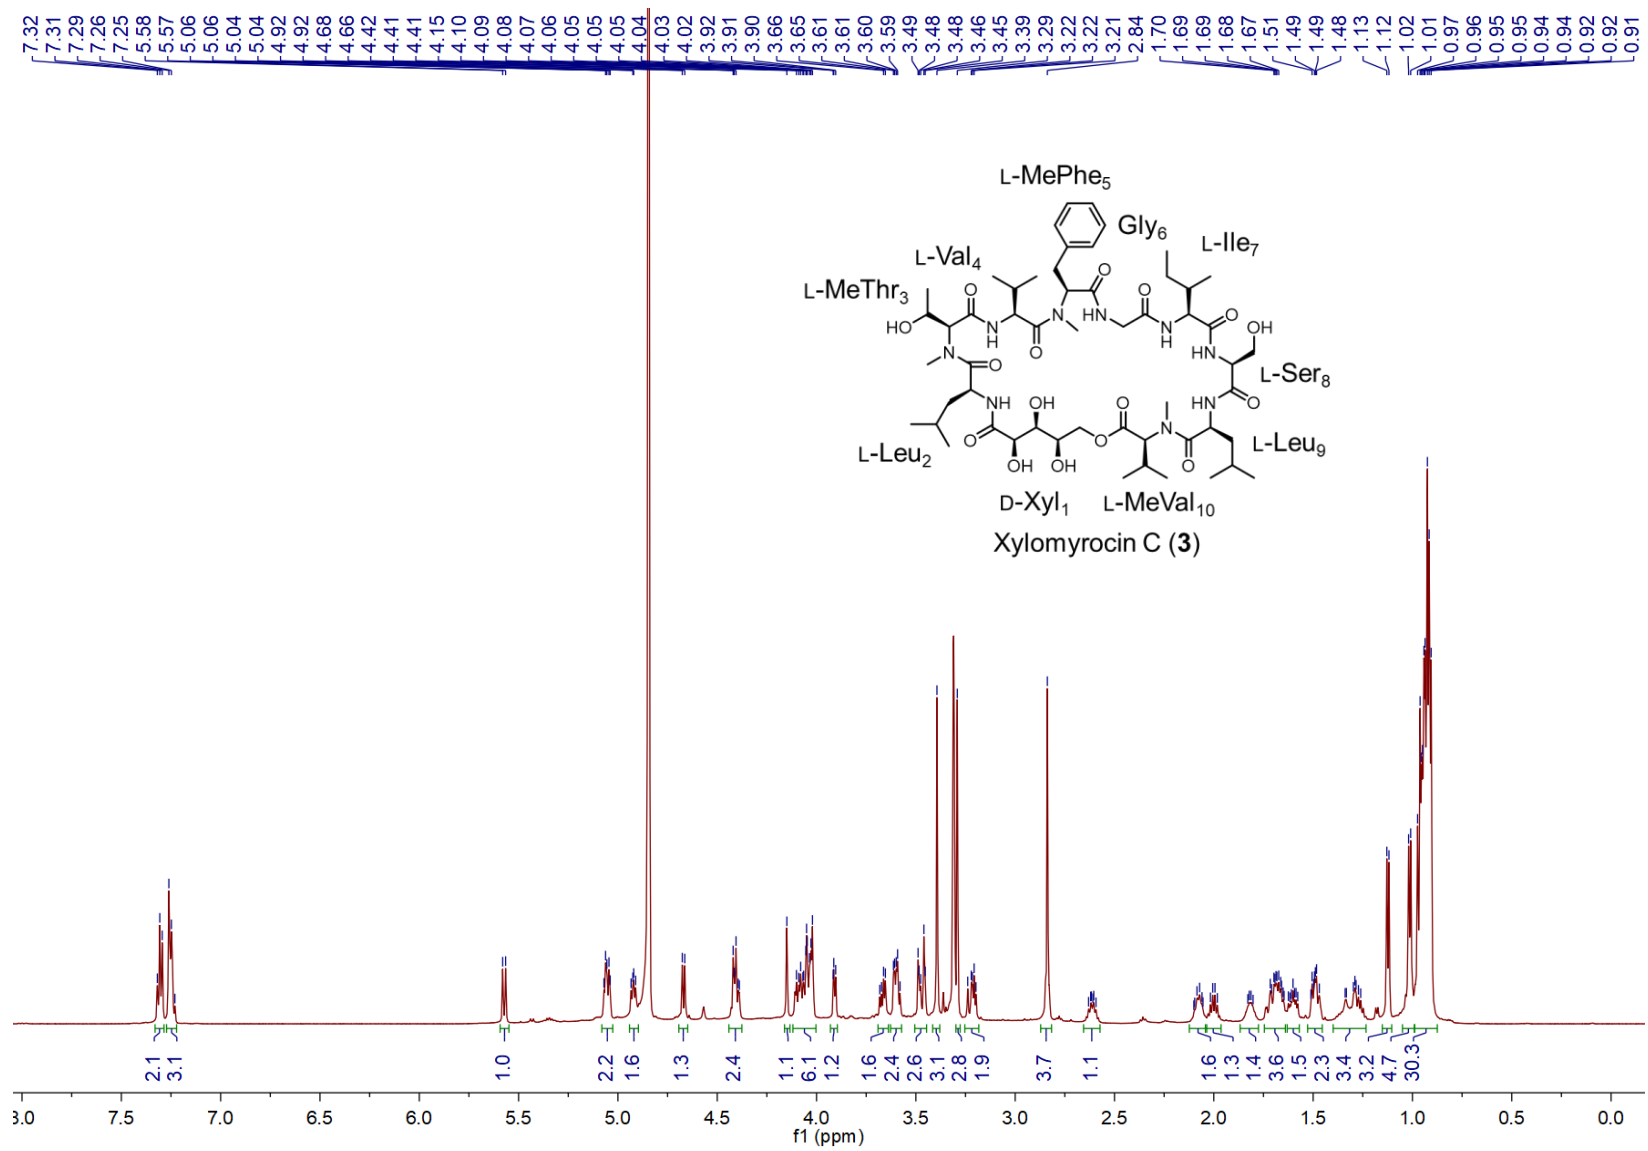

Figure S18.13. <sup>1</sup>H NMR spectrum of 3 in methanol-*d*<sub>4</sub>

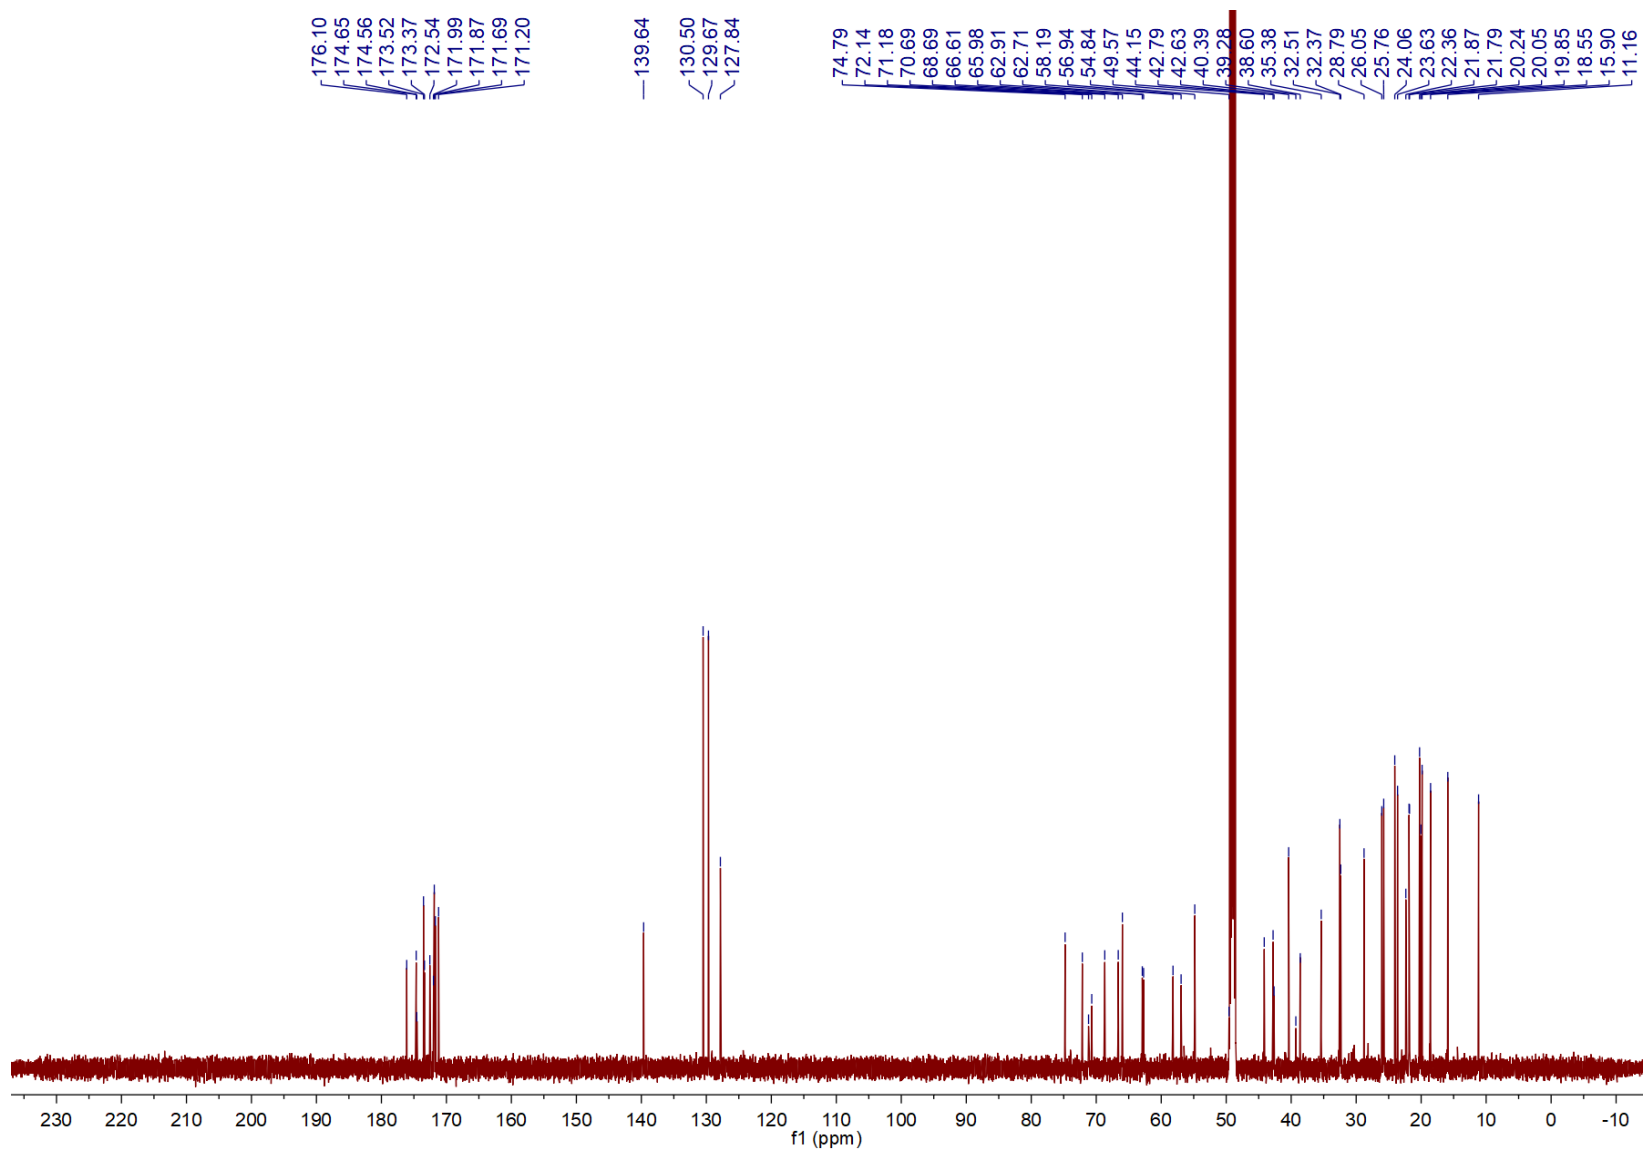

Figure S18.14.  $^{13}\text{C}$  NMR spectrum of 3 in methanol- $d_4$

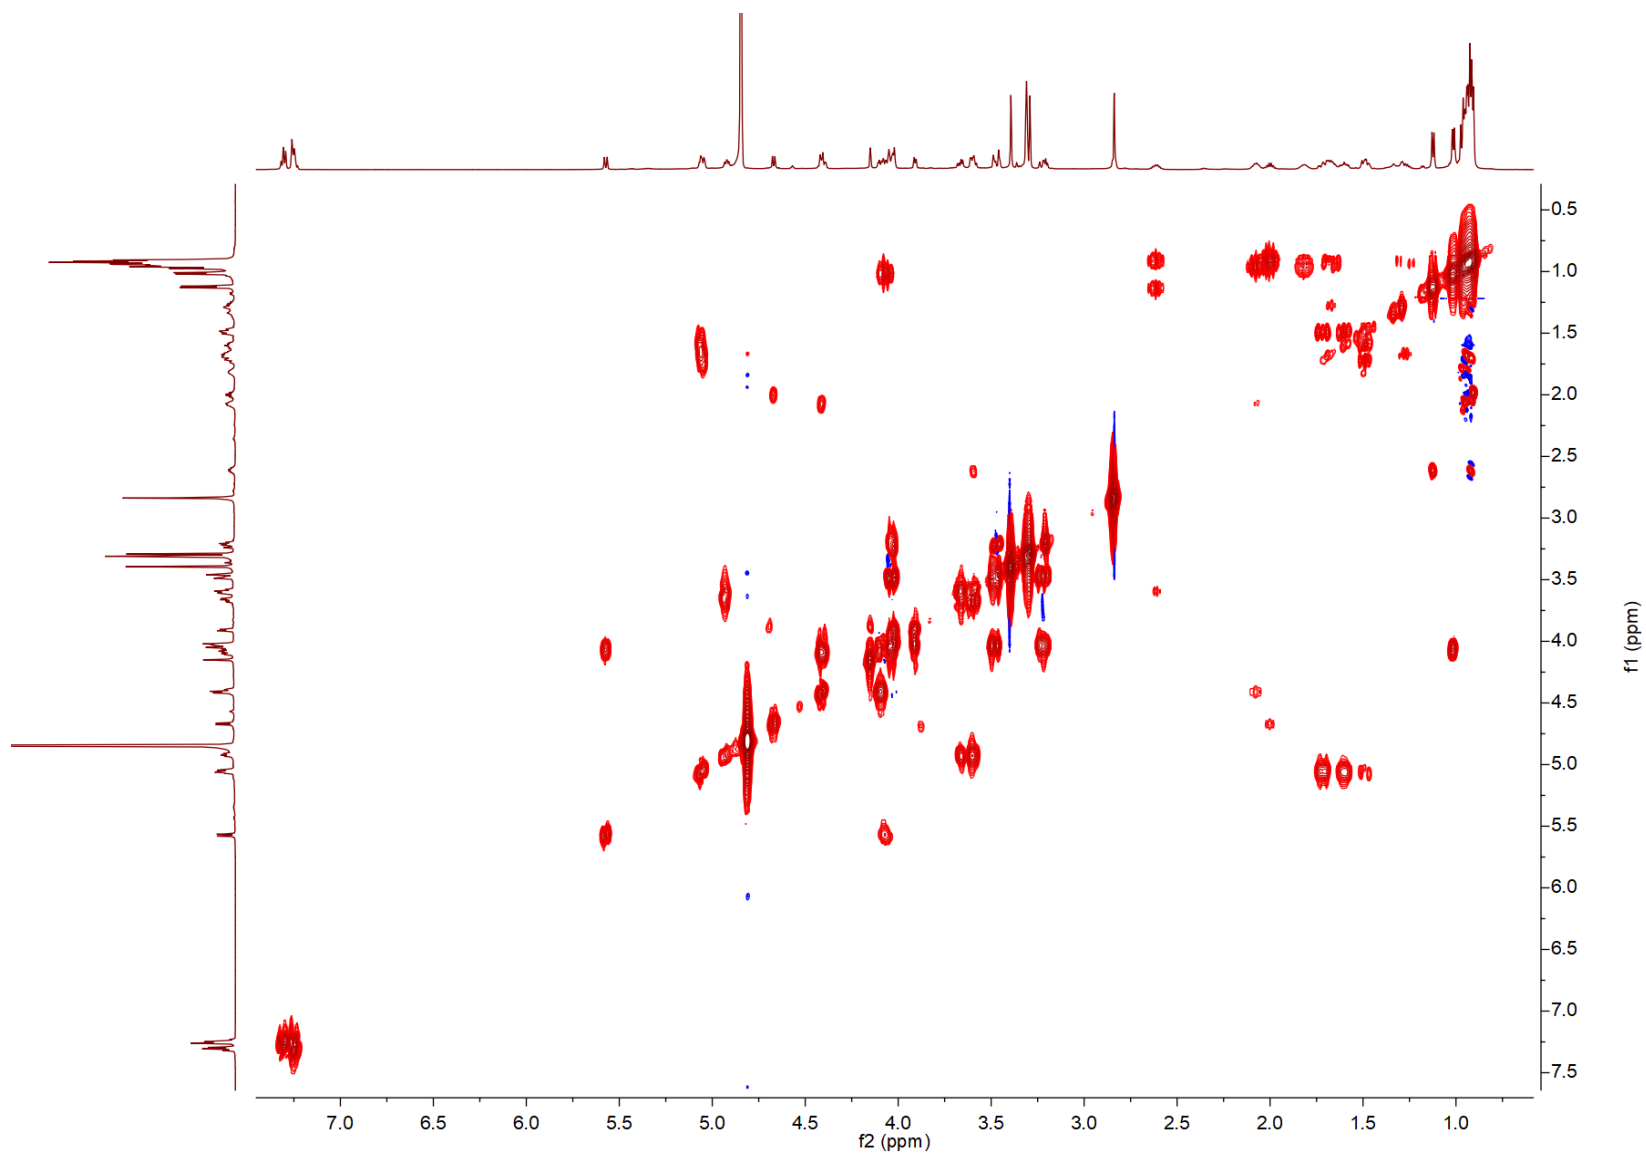

Figure S18.15.  $^1\text{H}$ - $^1\text{H}$  COSY spectrum of **3** in methanol- $d_4$

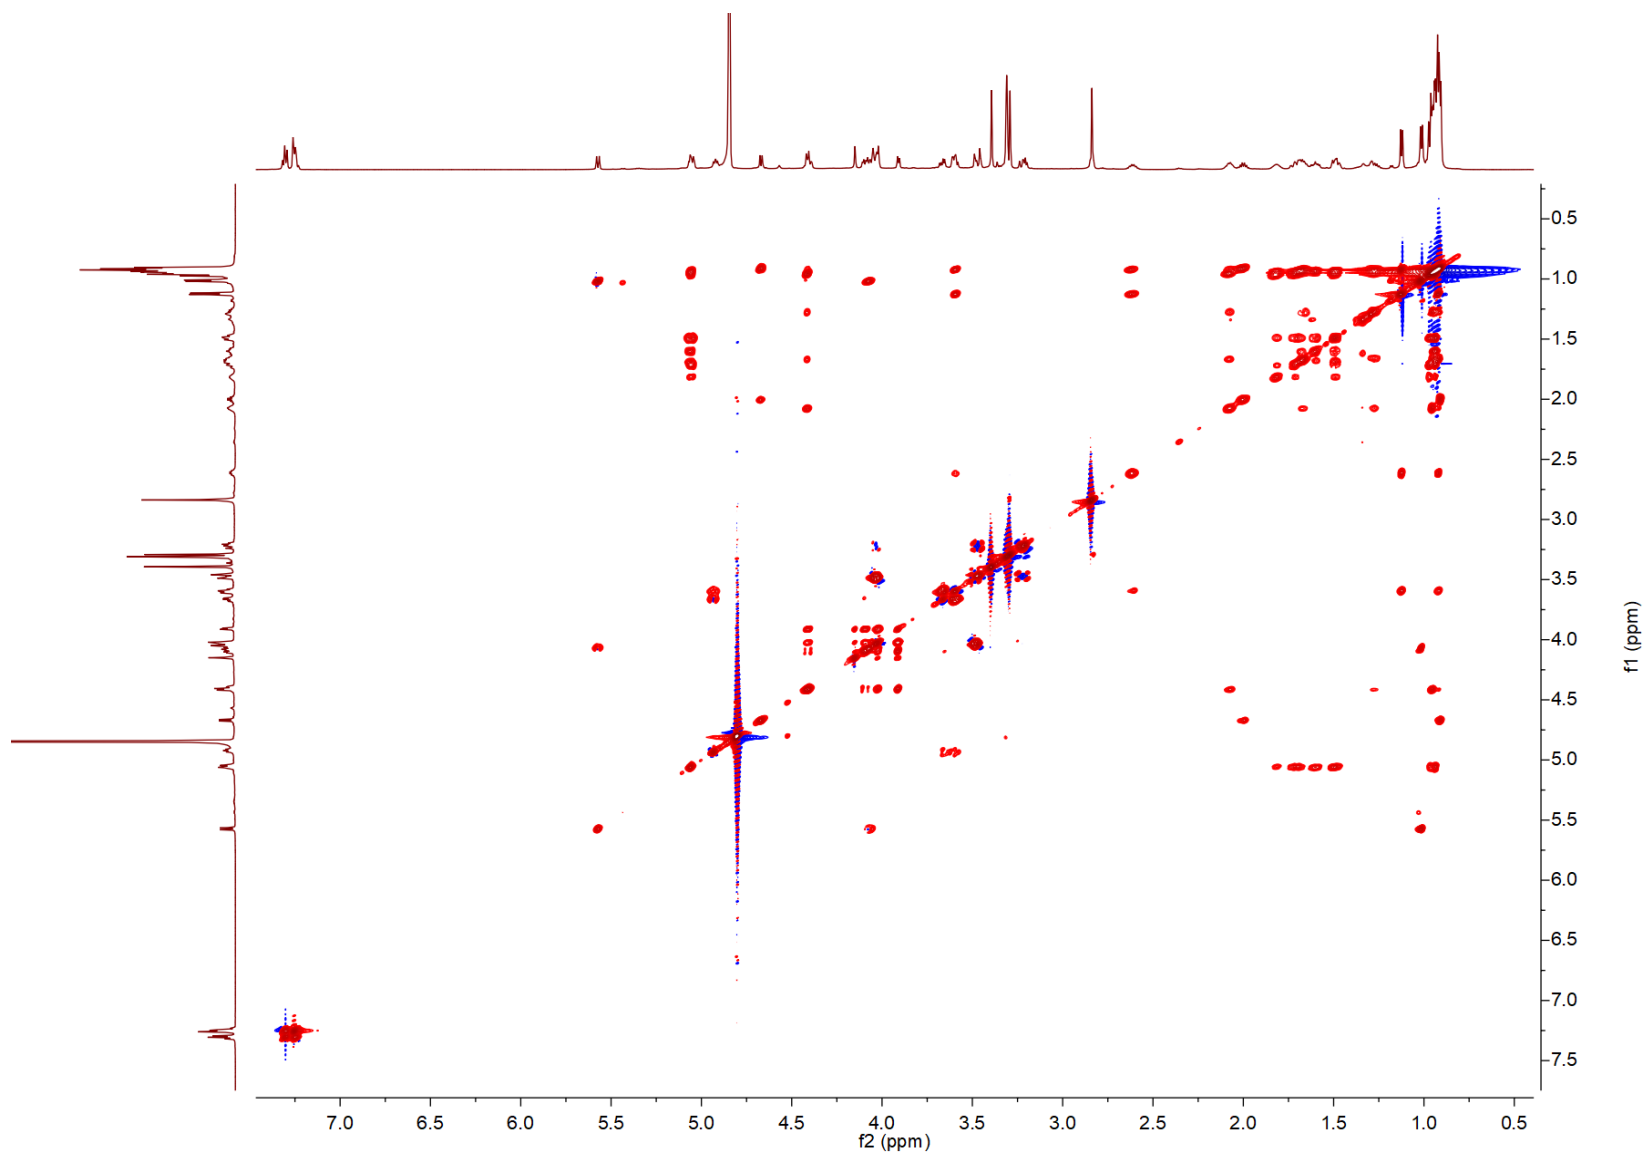

Figure S18.16.  $^1\text{H}$ - $^1\text{H}$  TOCSY spectrum of **3** in methanol- $d_4$

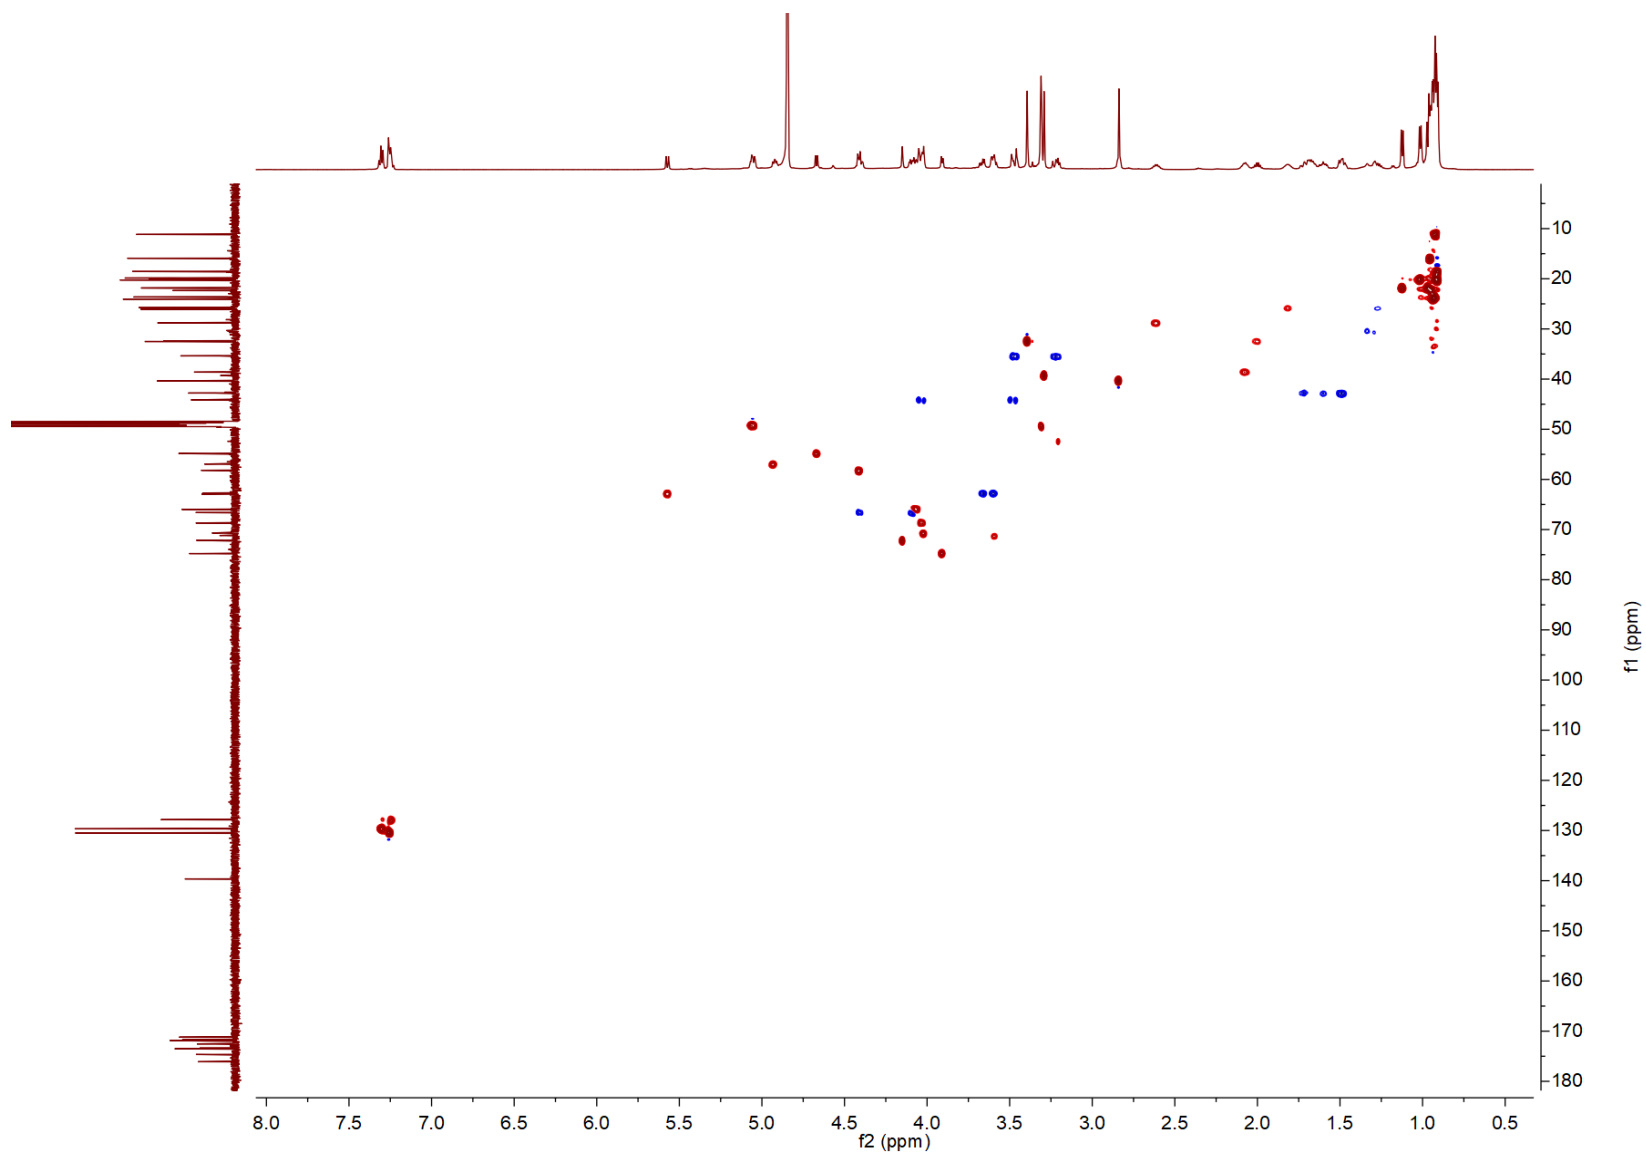

Figure S18.17. HSQC spectrum of 3 in methanol- $d_4$

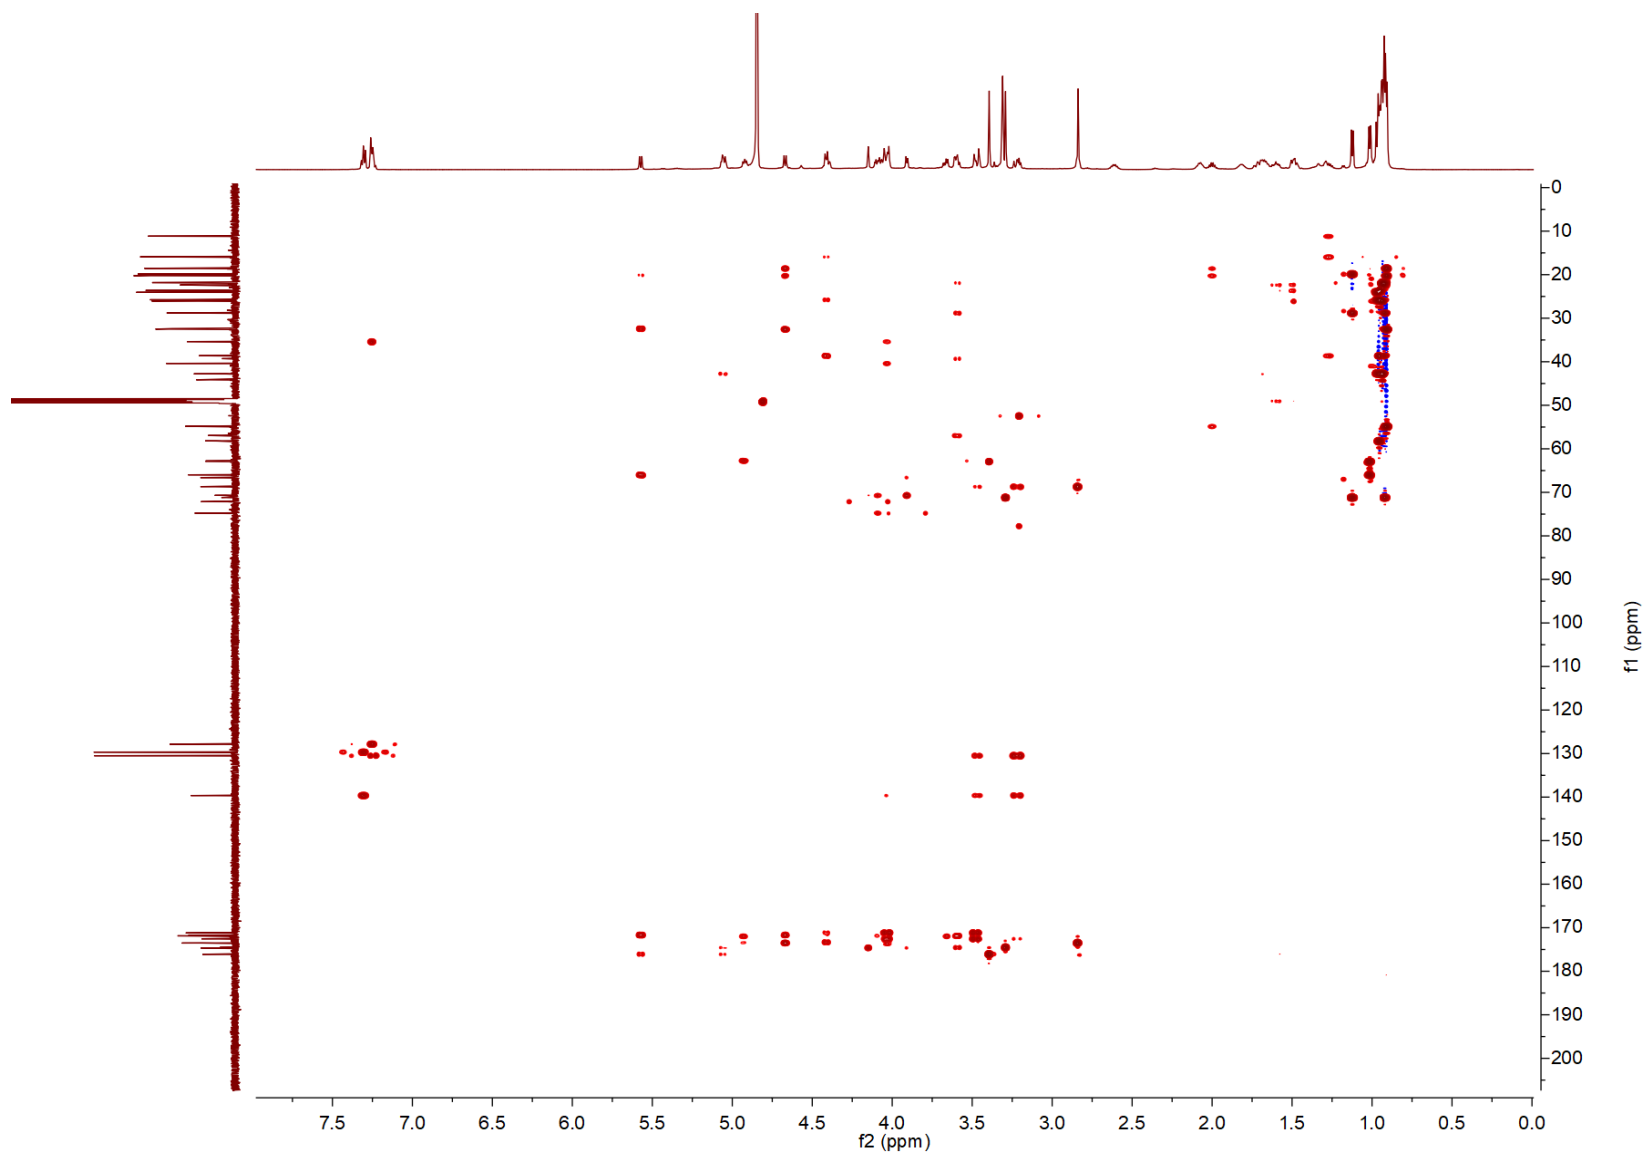

Figure S18.18. HMBC spectrum of 3 in methanol- $d_4$

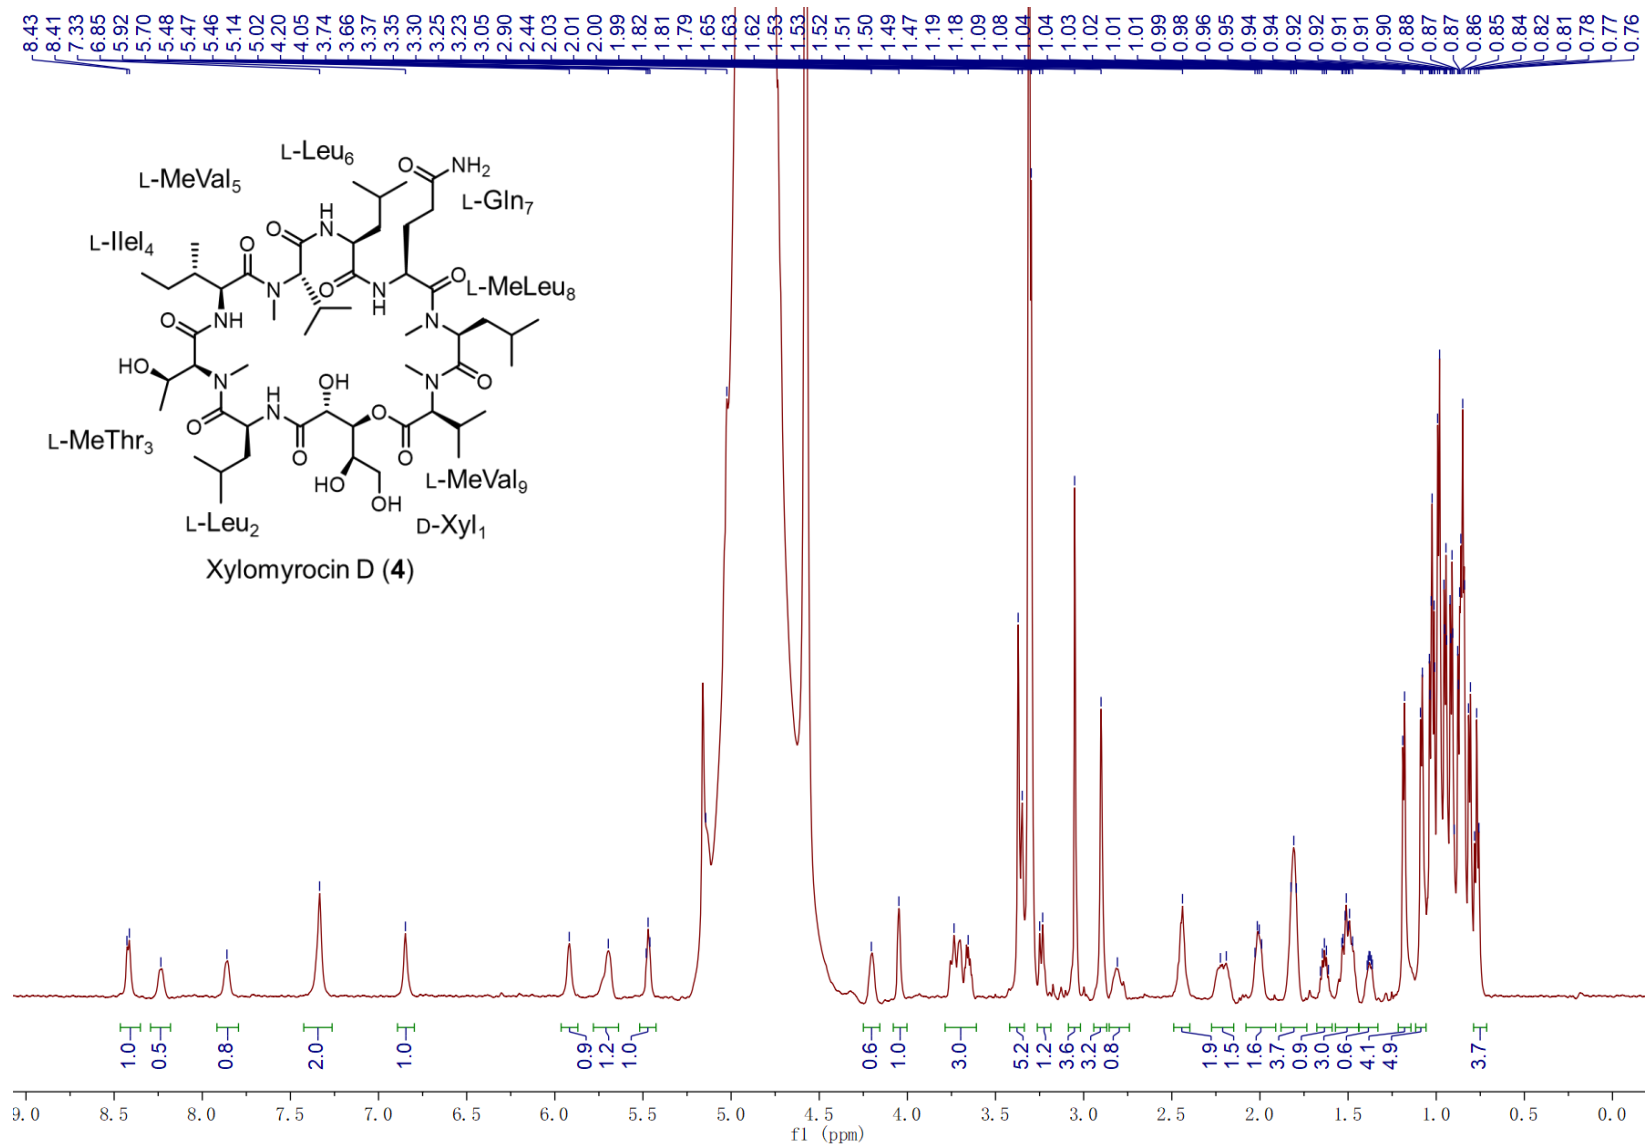

Figure S18.19. <sup>1</sup>H NMR spectrum of 4 in CD<sub>3</sub>OH



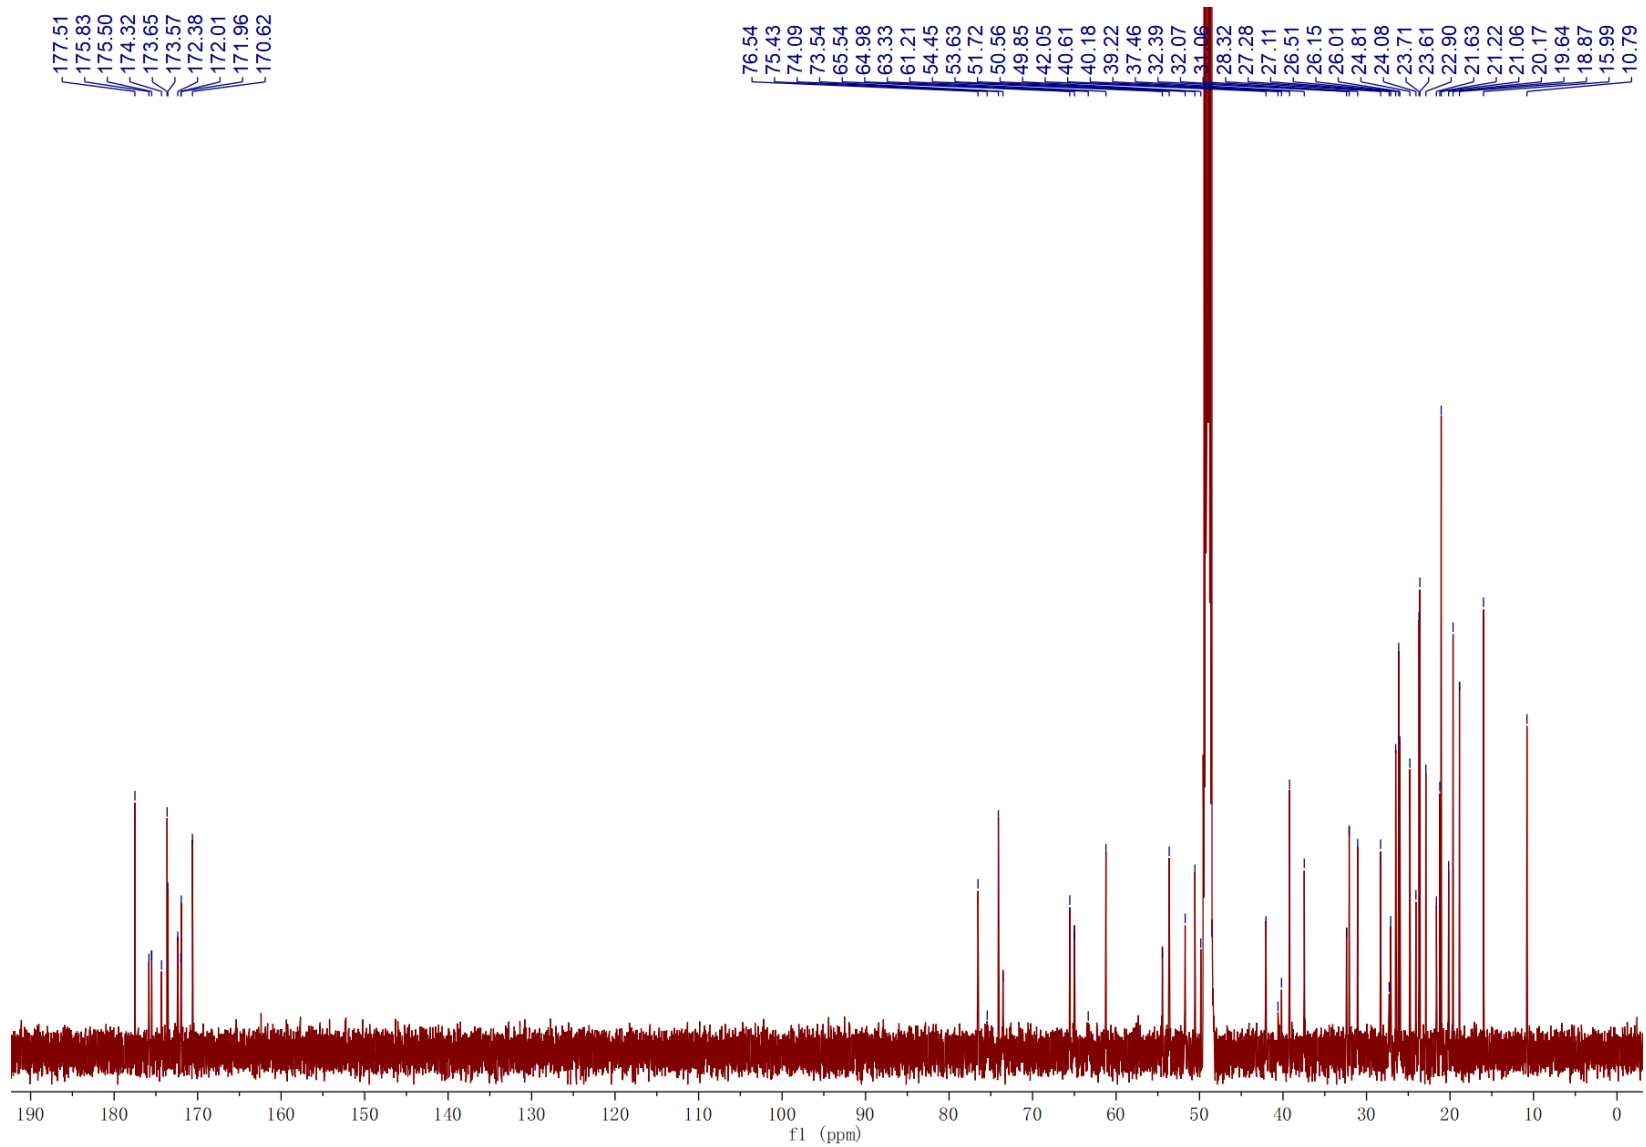

Figure S18.20.  $^{13}\text{C}$  NMR spectrum of 4 in  $\text{CD}_3\text{OH}$

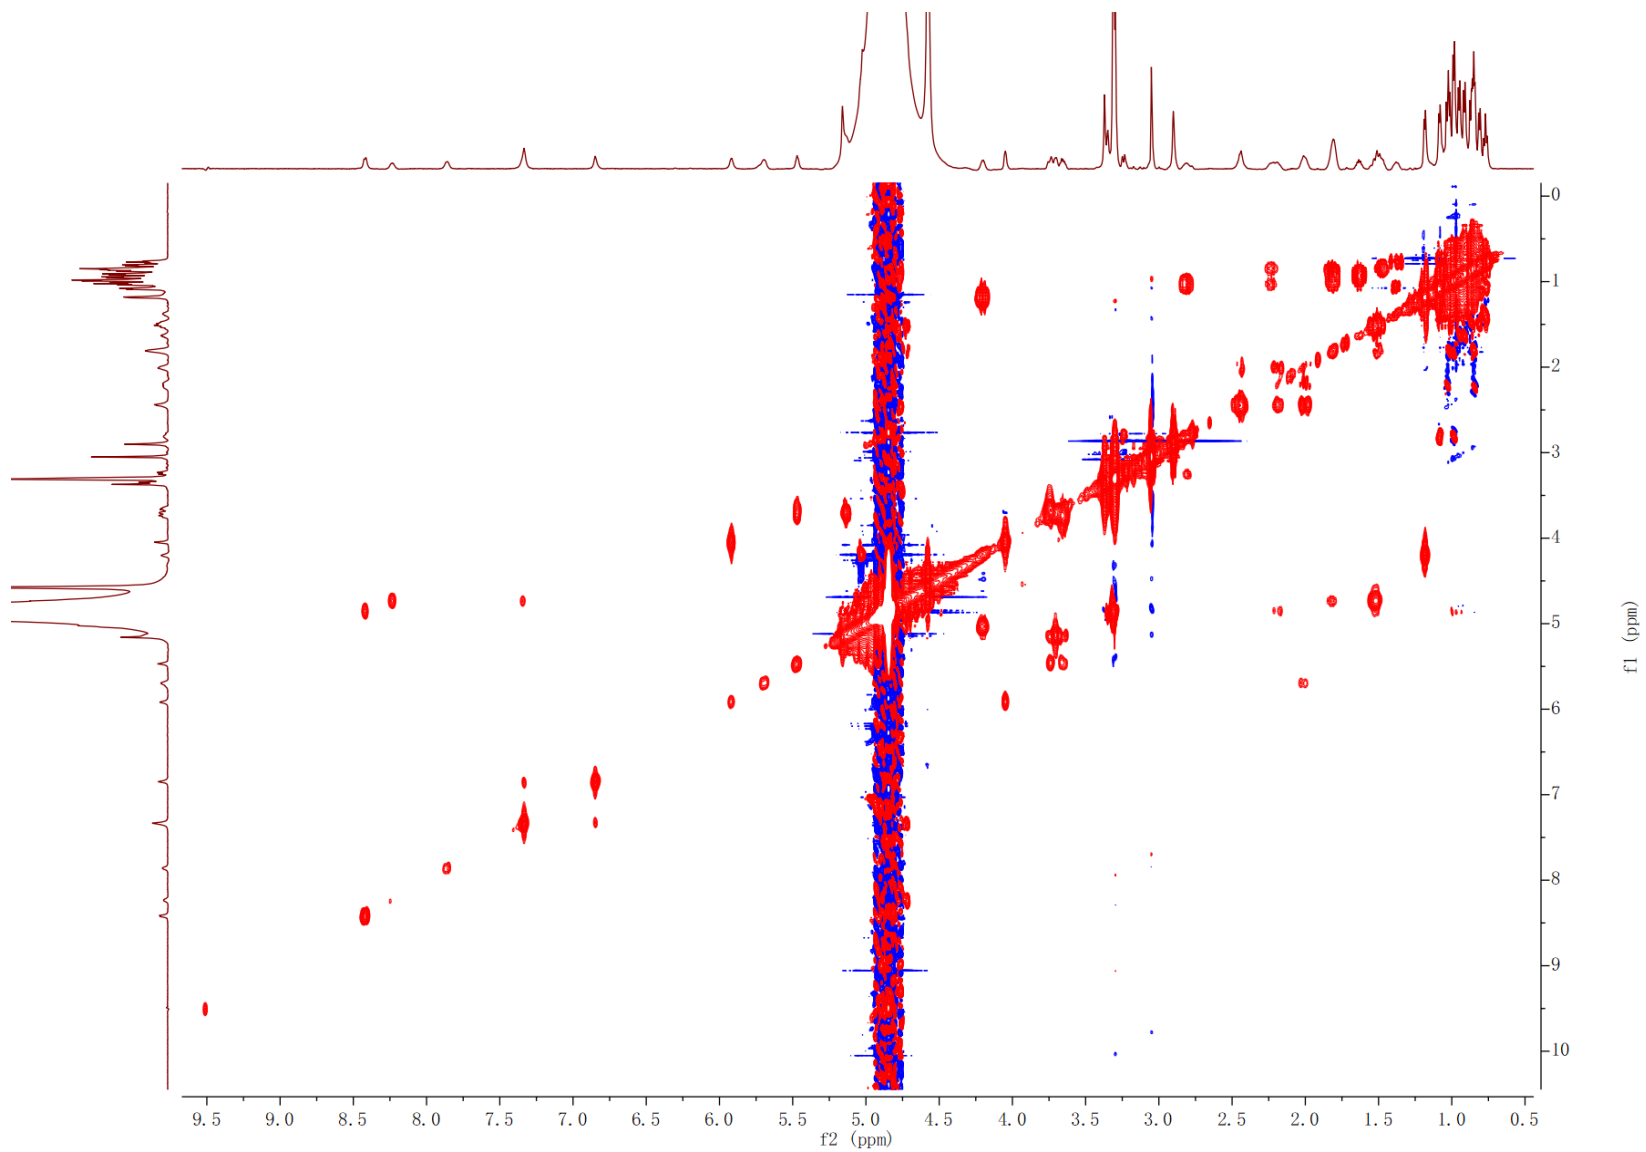

Figure S18.21.  $^1\text{H}$ - $^1\text{H}$  COSY spectrum of 4 in  $\text{CD}_3\text{OH}$

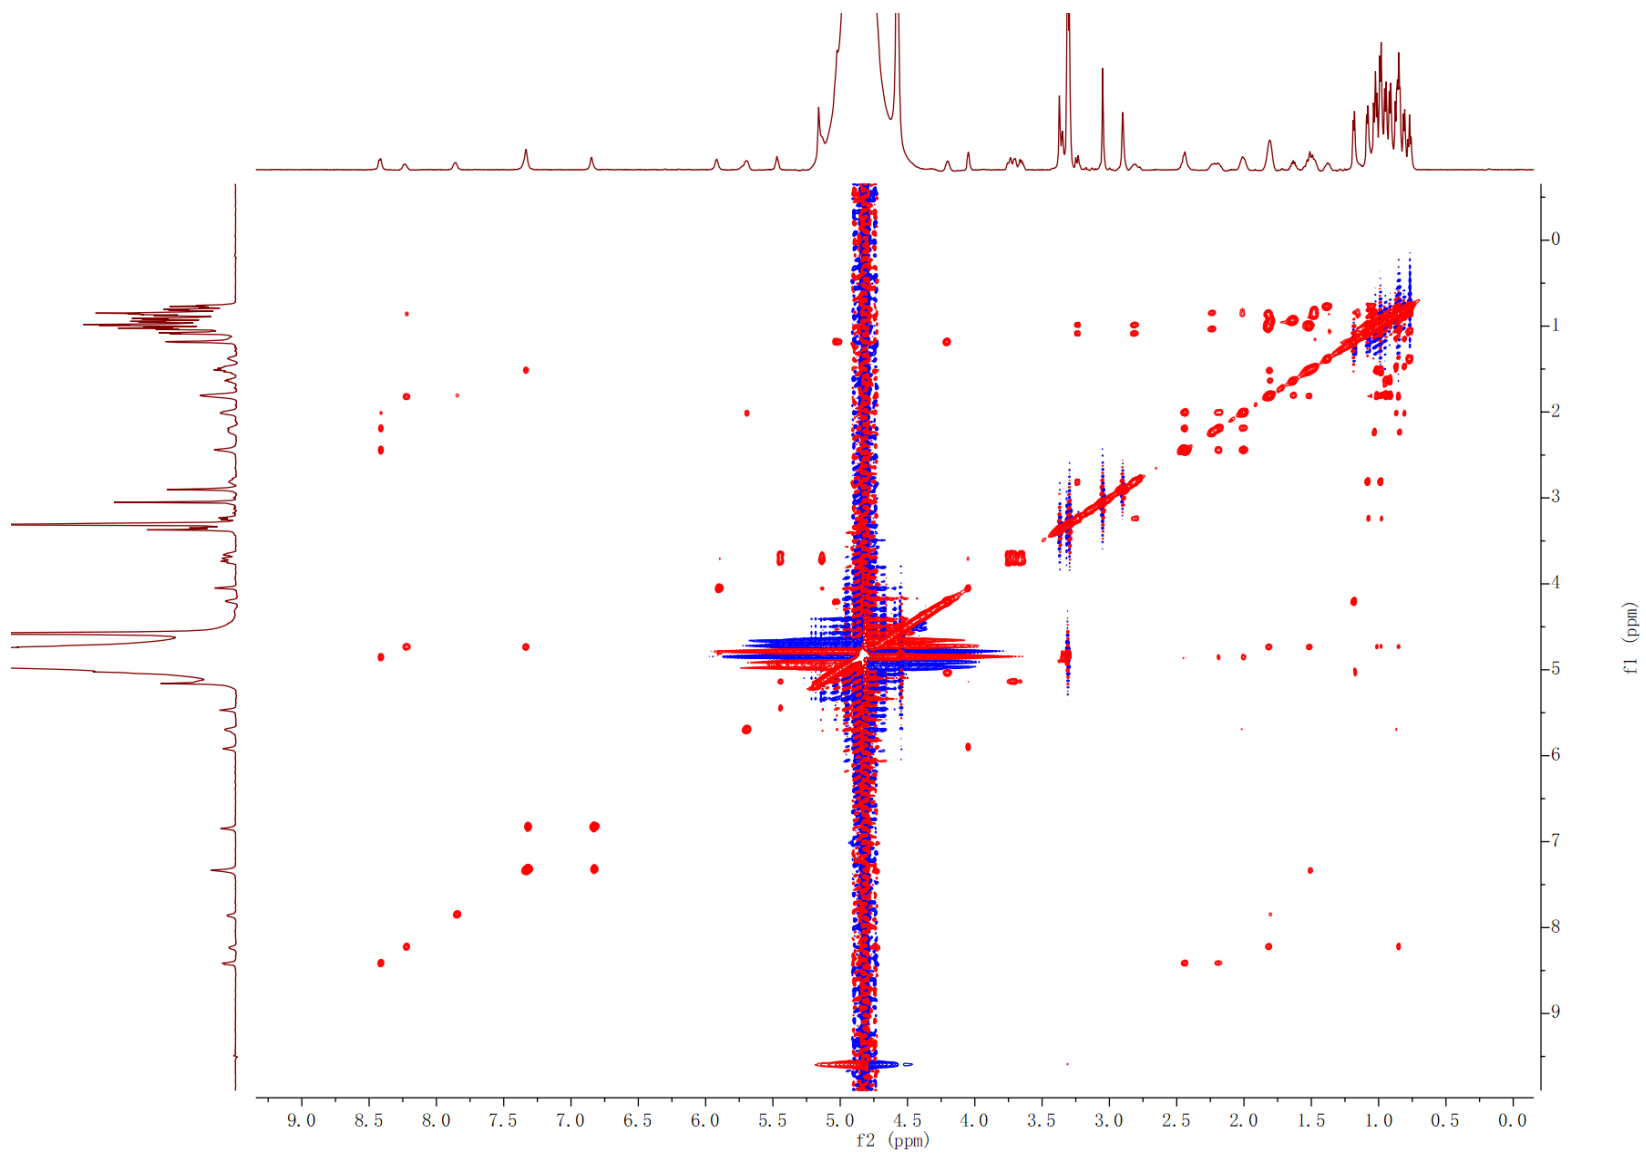

Figure S18.22.  $^1\text{H}$ - $^1\text{H}$  TOCSY spectrum of **4** in  $\text{CD}_3\text{OH}$

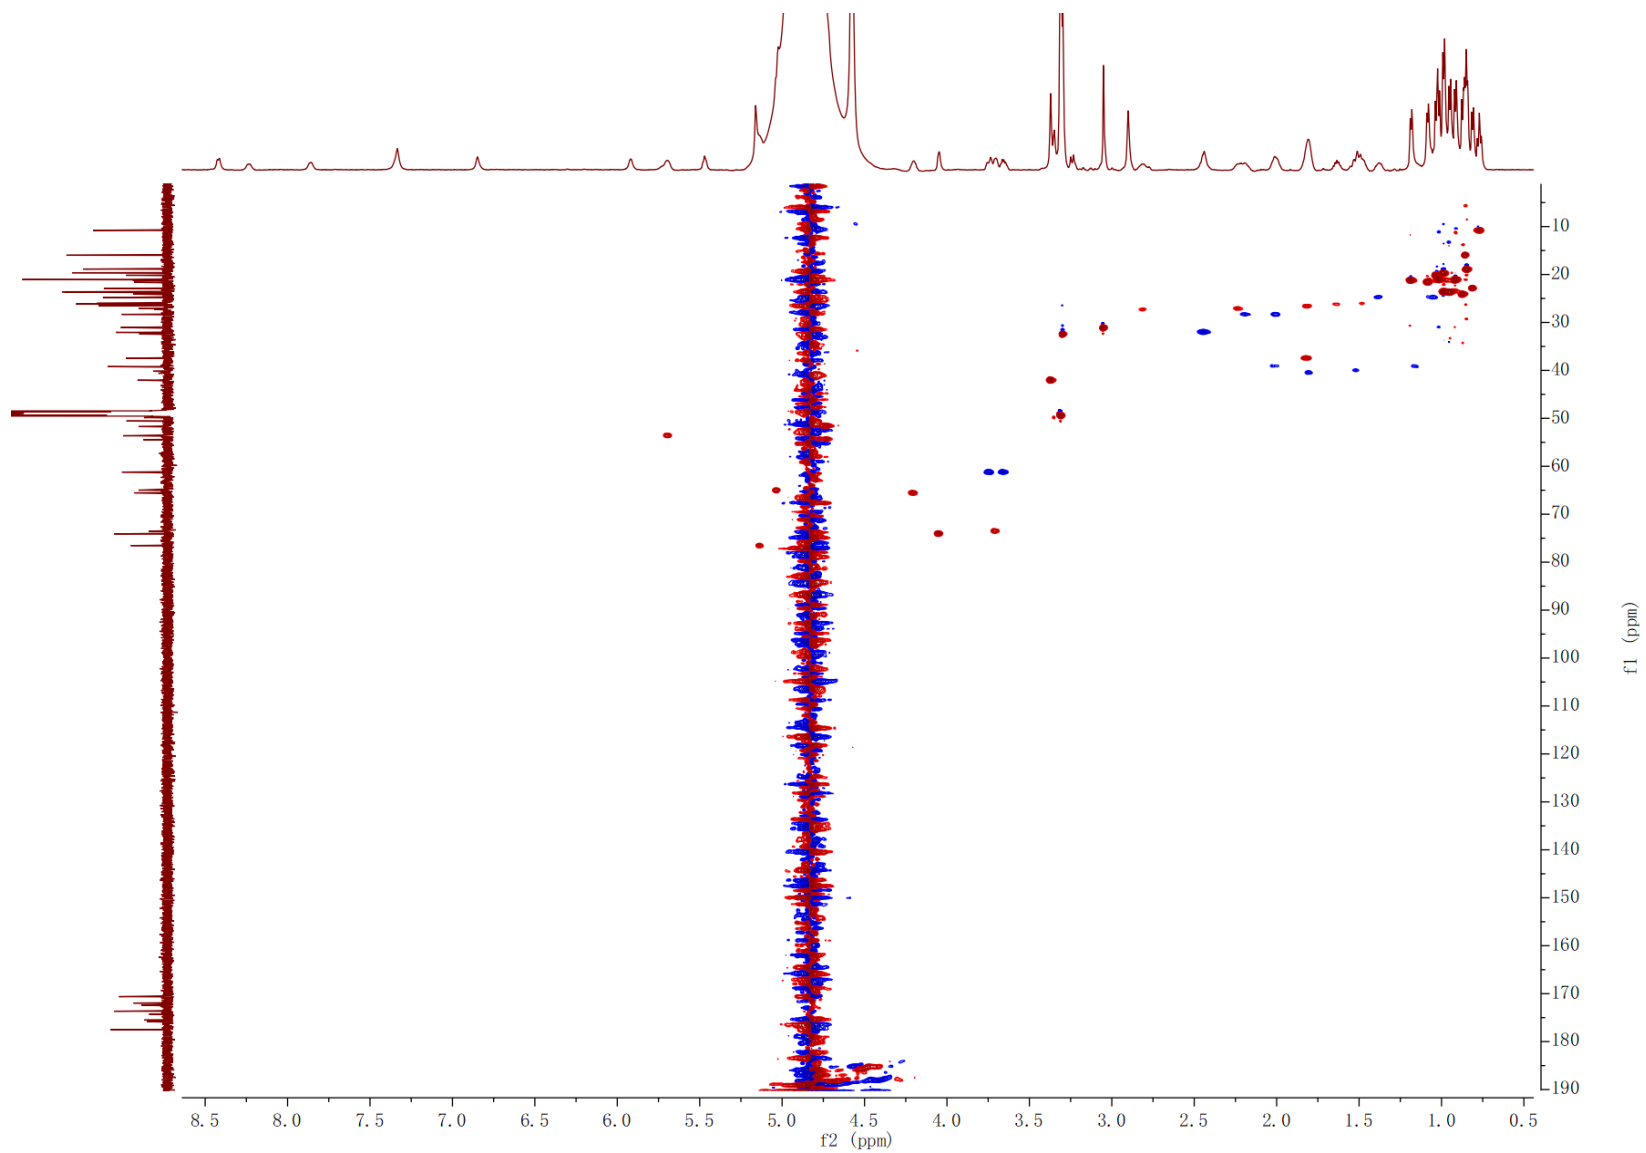

Figure S18.23. HSQC spectrum of 4 in CD<sub>3</sub>OH

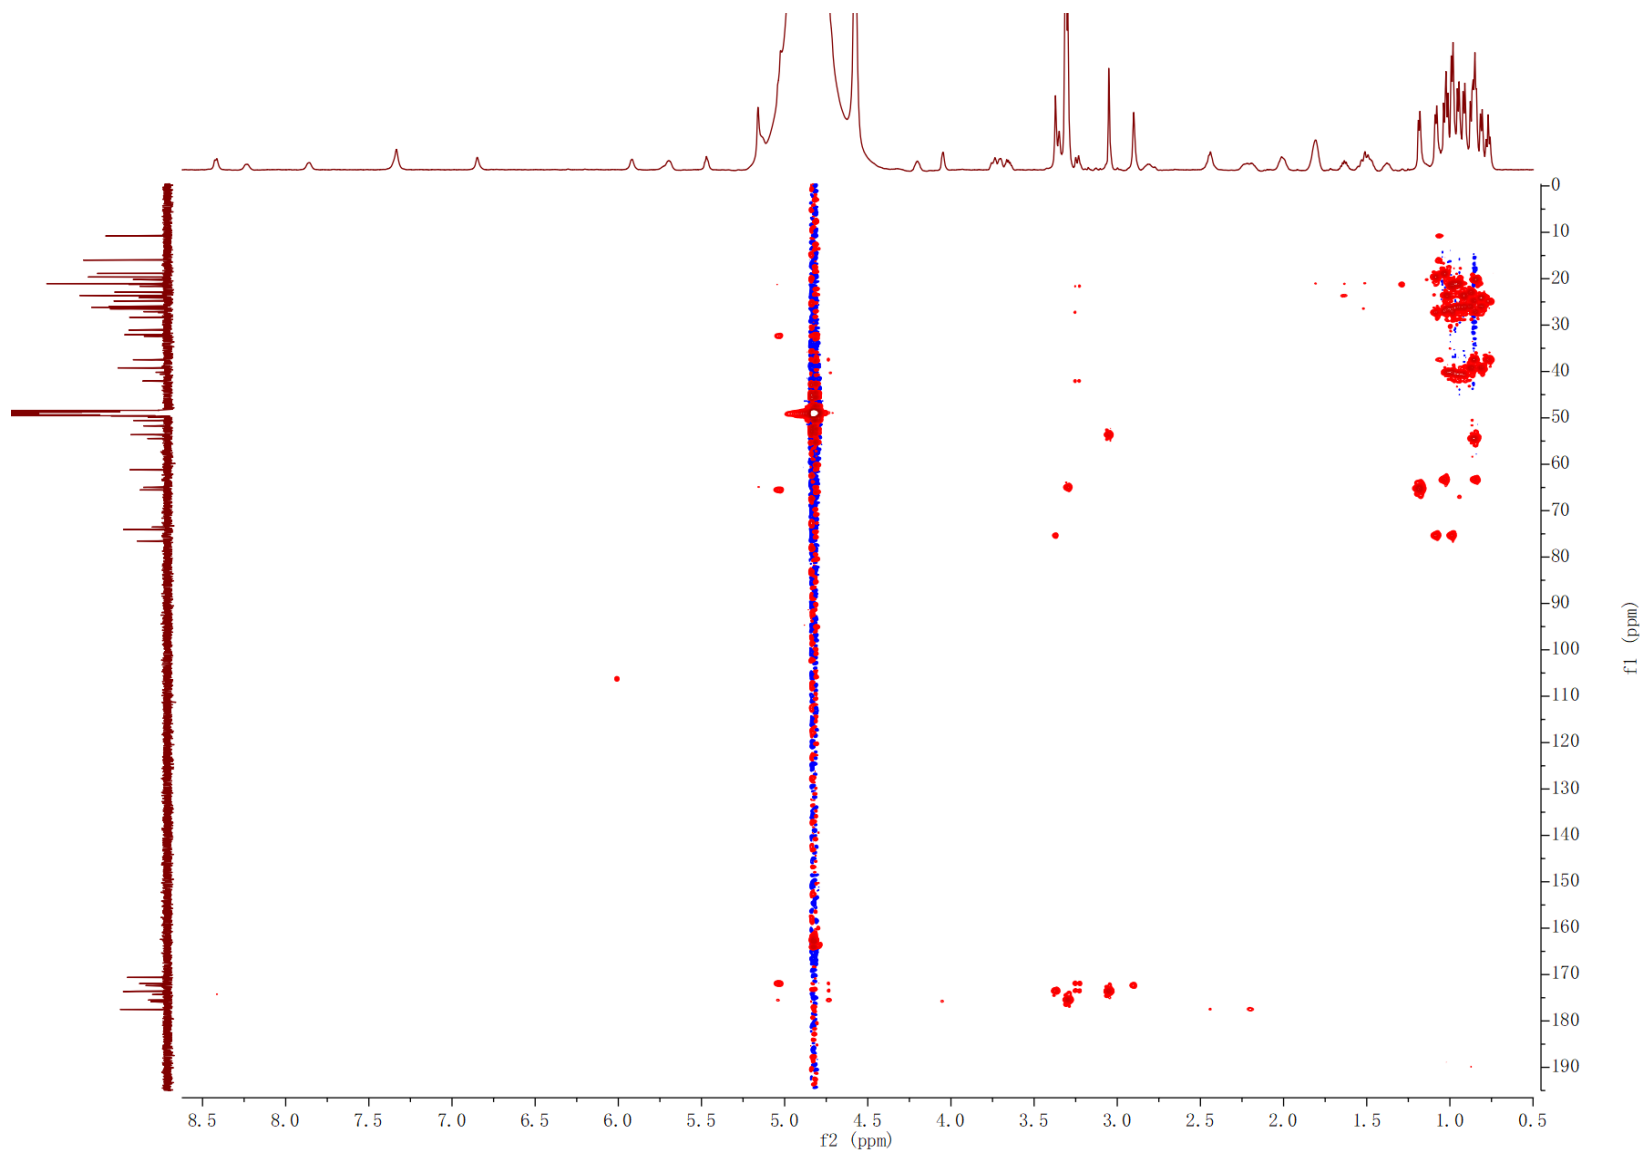

Figure S18.24. HMBC spectrum of 4 in CD<sub>3</sub>OH

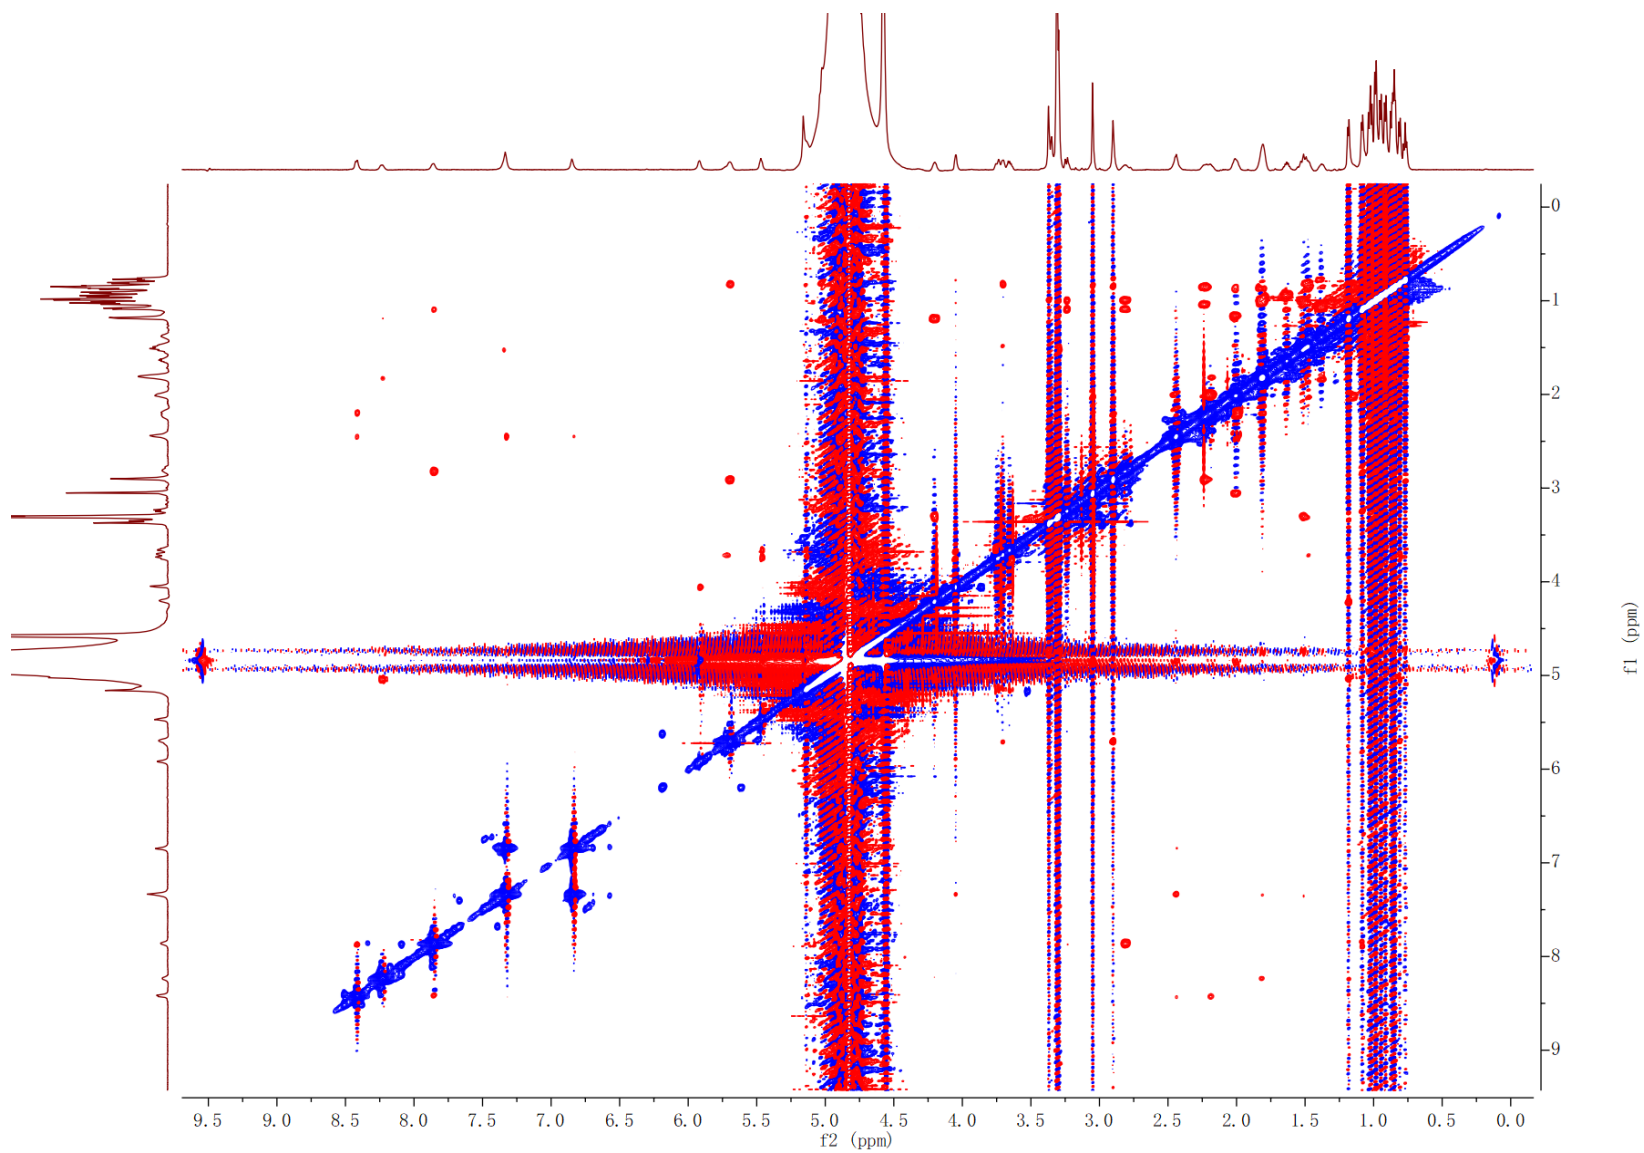

Figure S18.25. ROESY spectrum of 4 in CD<sub>3</sub>OH

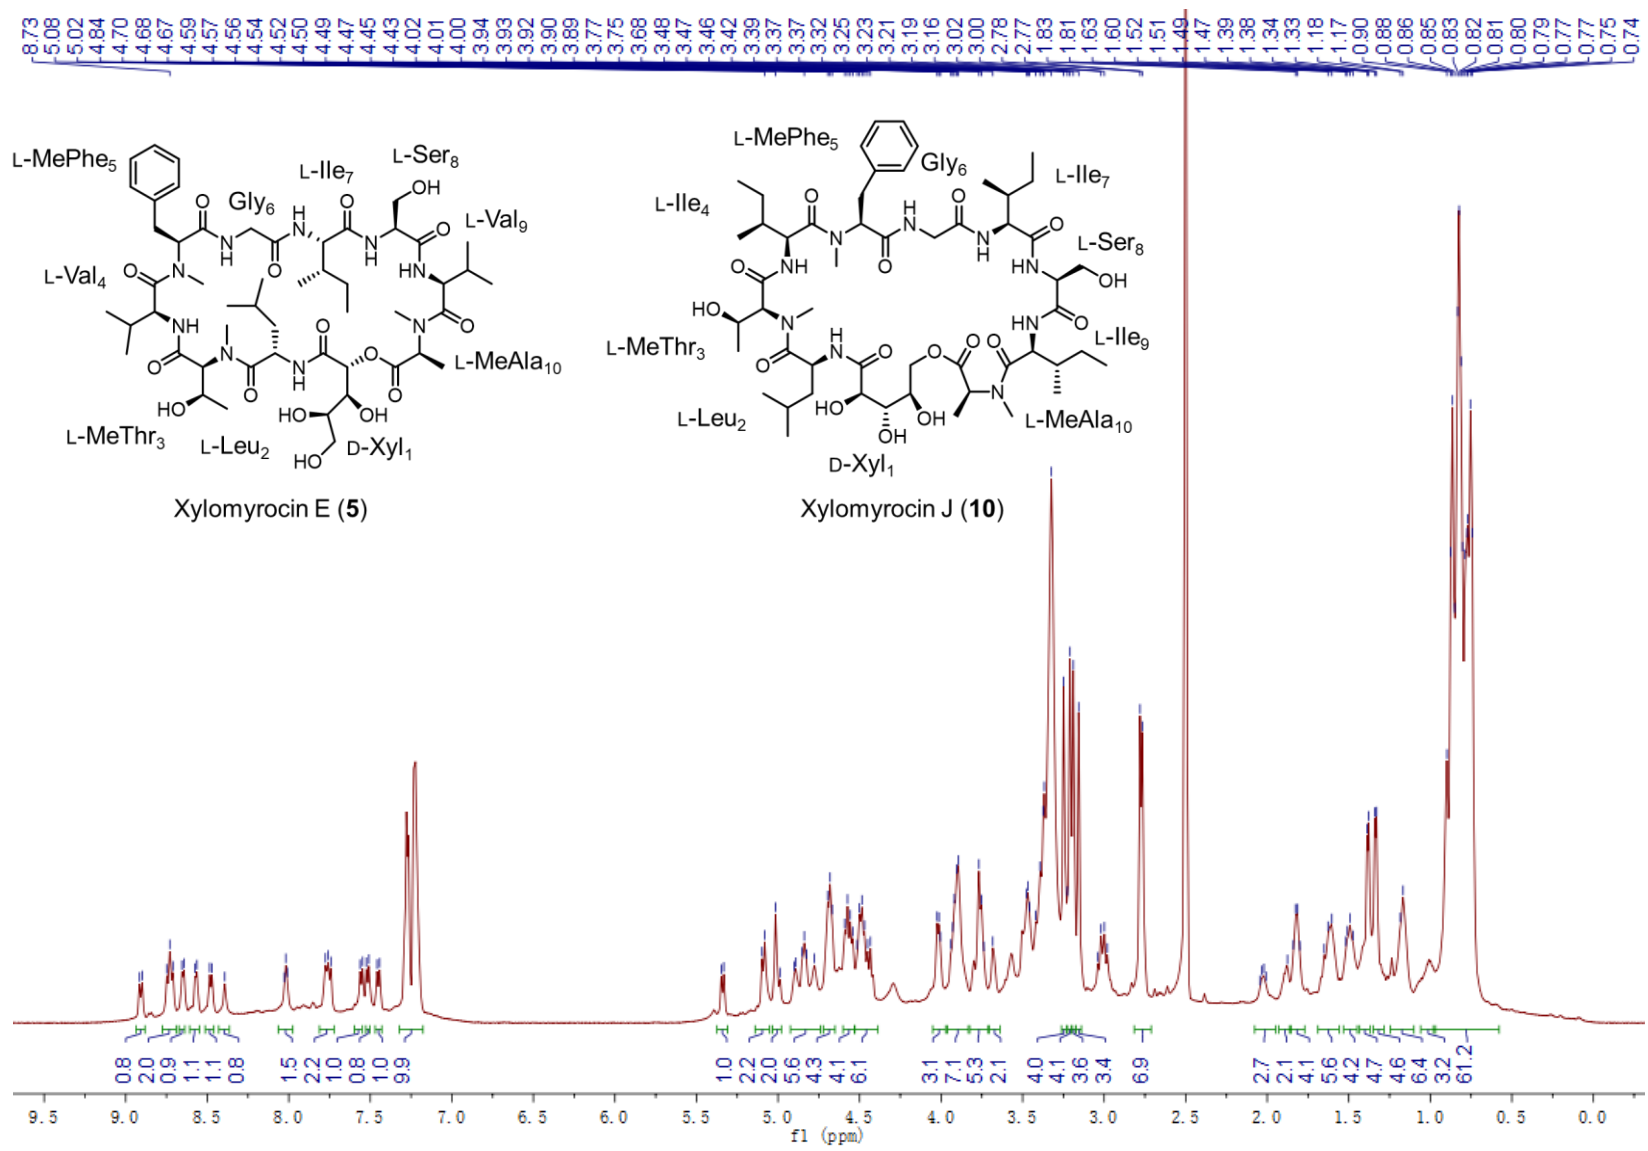

Figure S18.26. <sup>1</sup>H NMR spectrum of the mixture of 5 and 10 in DMSO-d<sub>6</sub>

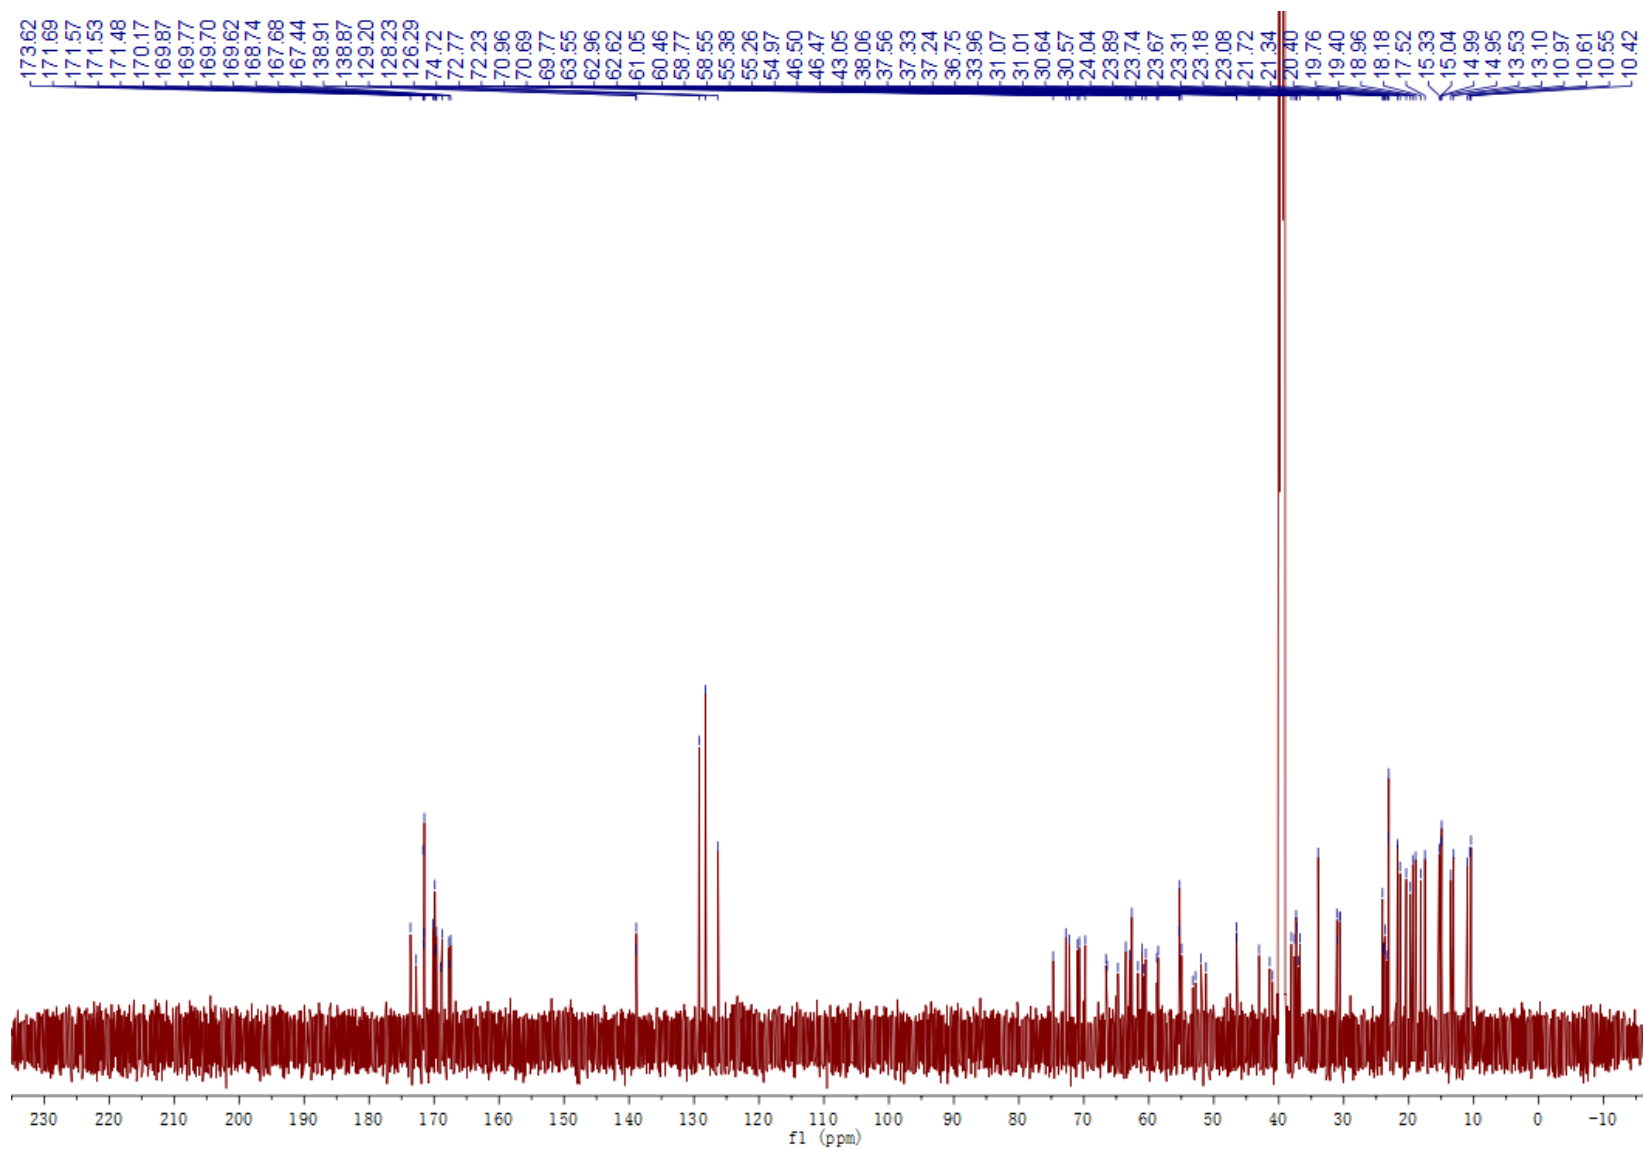

Figure S18.27.  $^{13}\text{C}$  NMR spectrum of the mixture of 5 and 10 in  $\text{DMSO-}d_6$



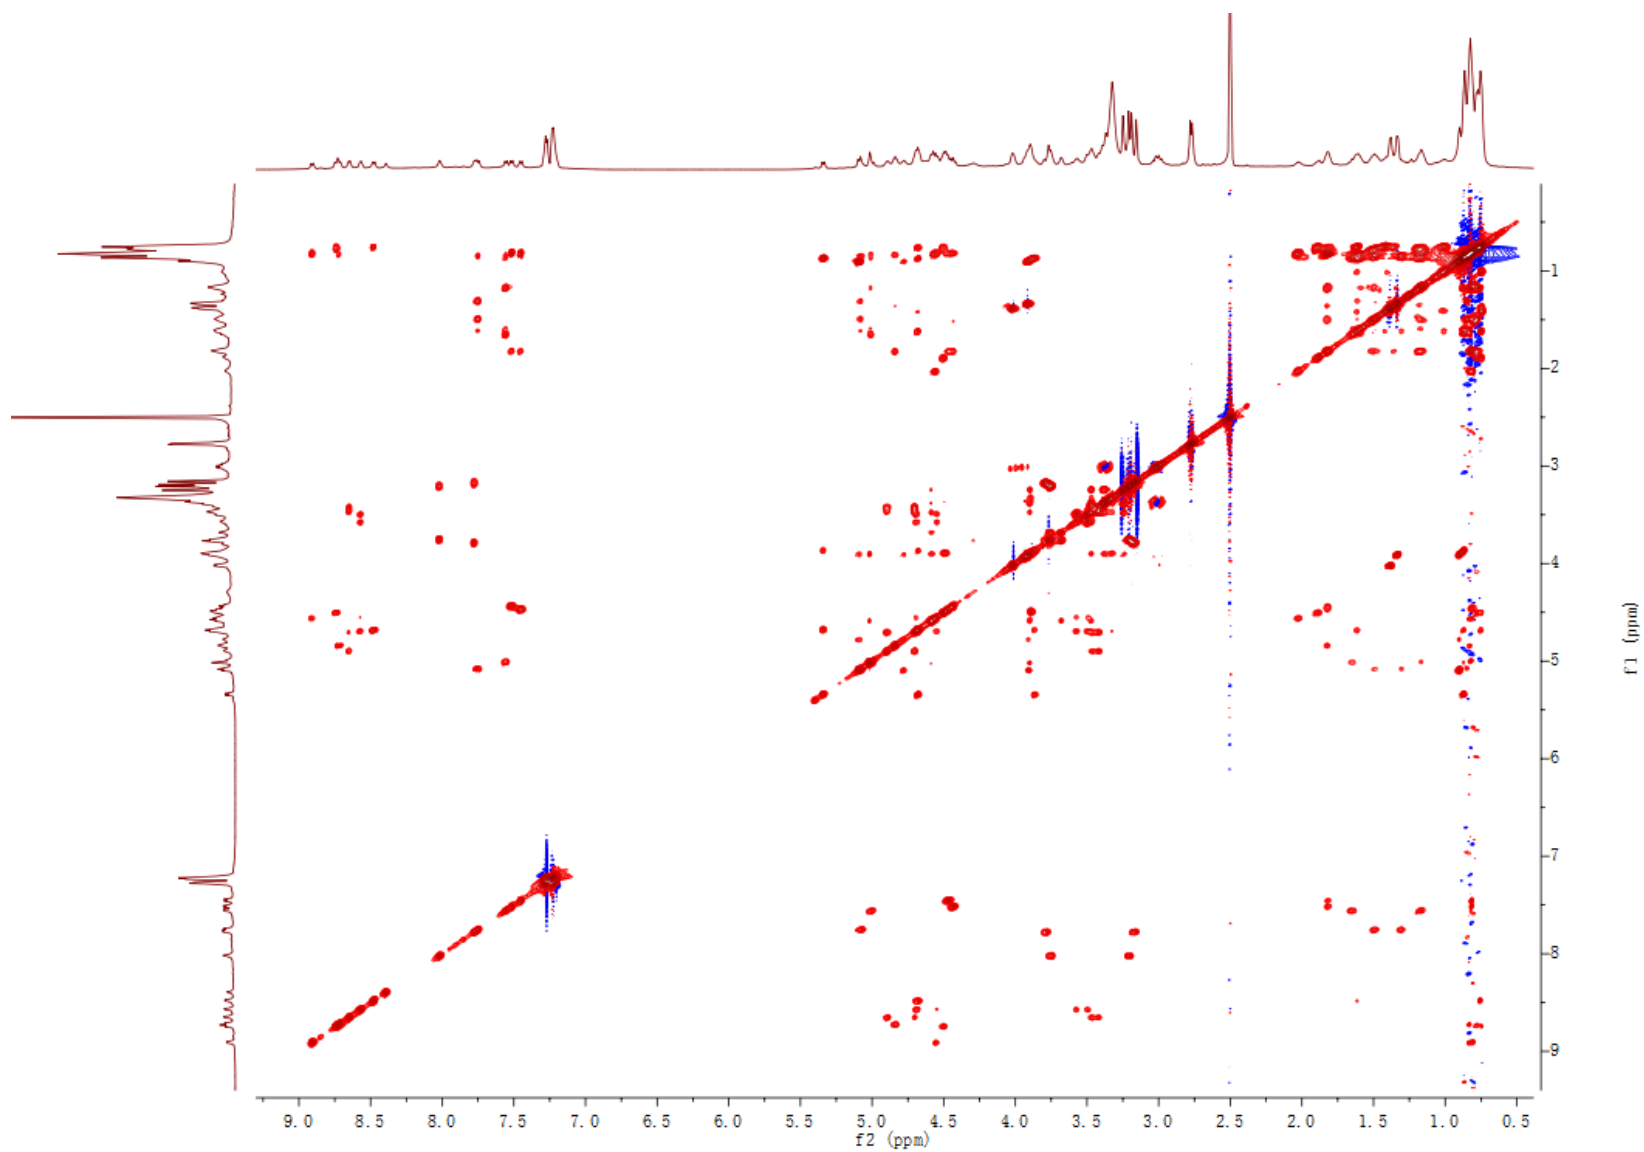

Figure S18.28.  $^1\text{H}$ - $^1\text{H}$  TOCSY spectrum of the mixture of 5 and 10 in  $\text{DMSO-}d_6$

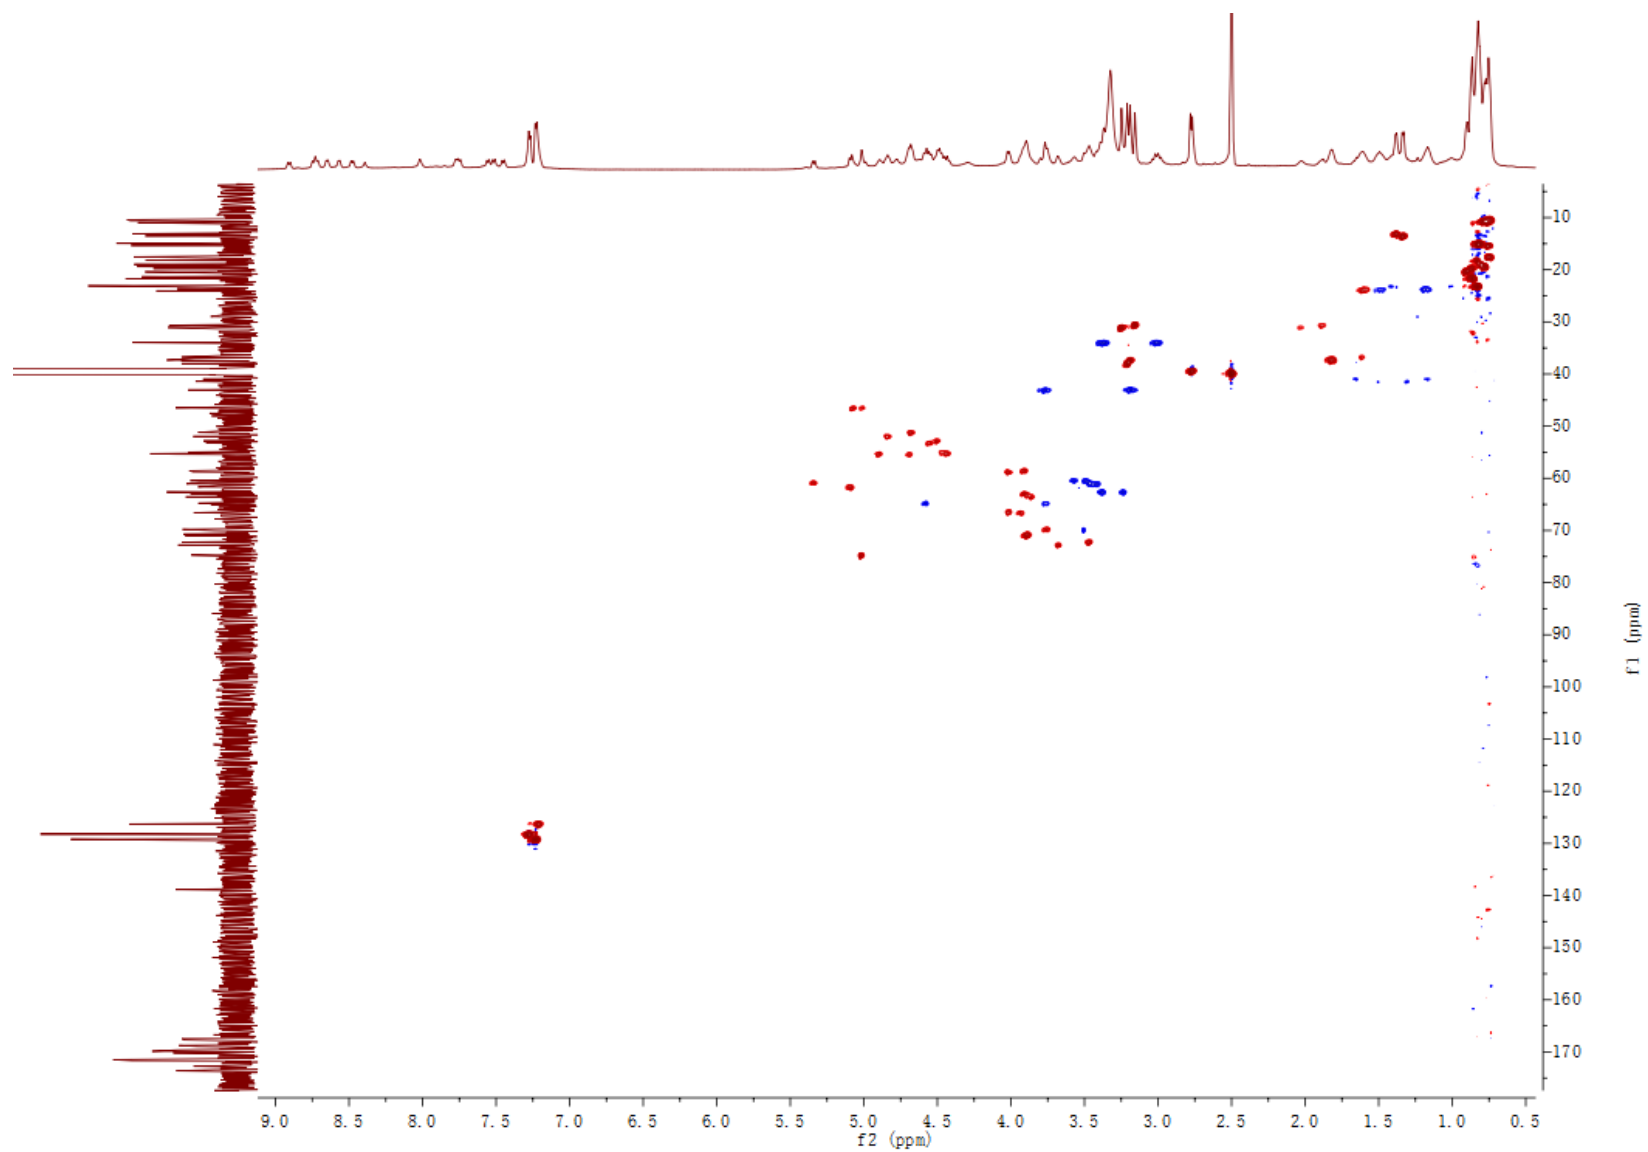

Figure S18.29. HSQC spectrum of the mixture of 5 and 10 in DMSO-*d*<sub>6</sub>

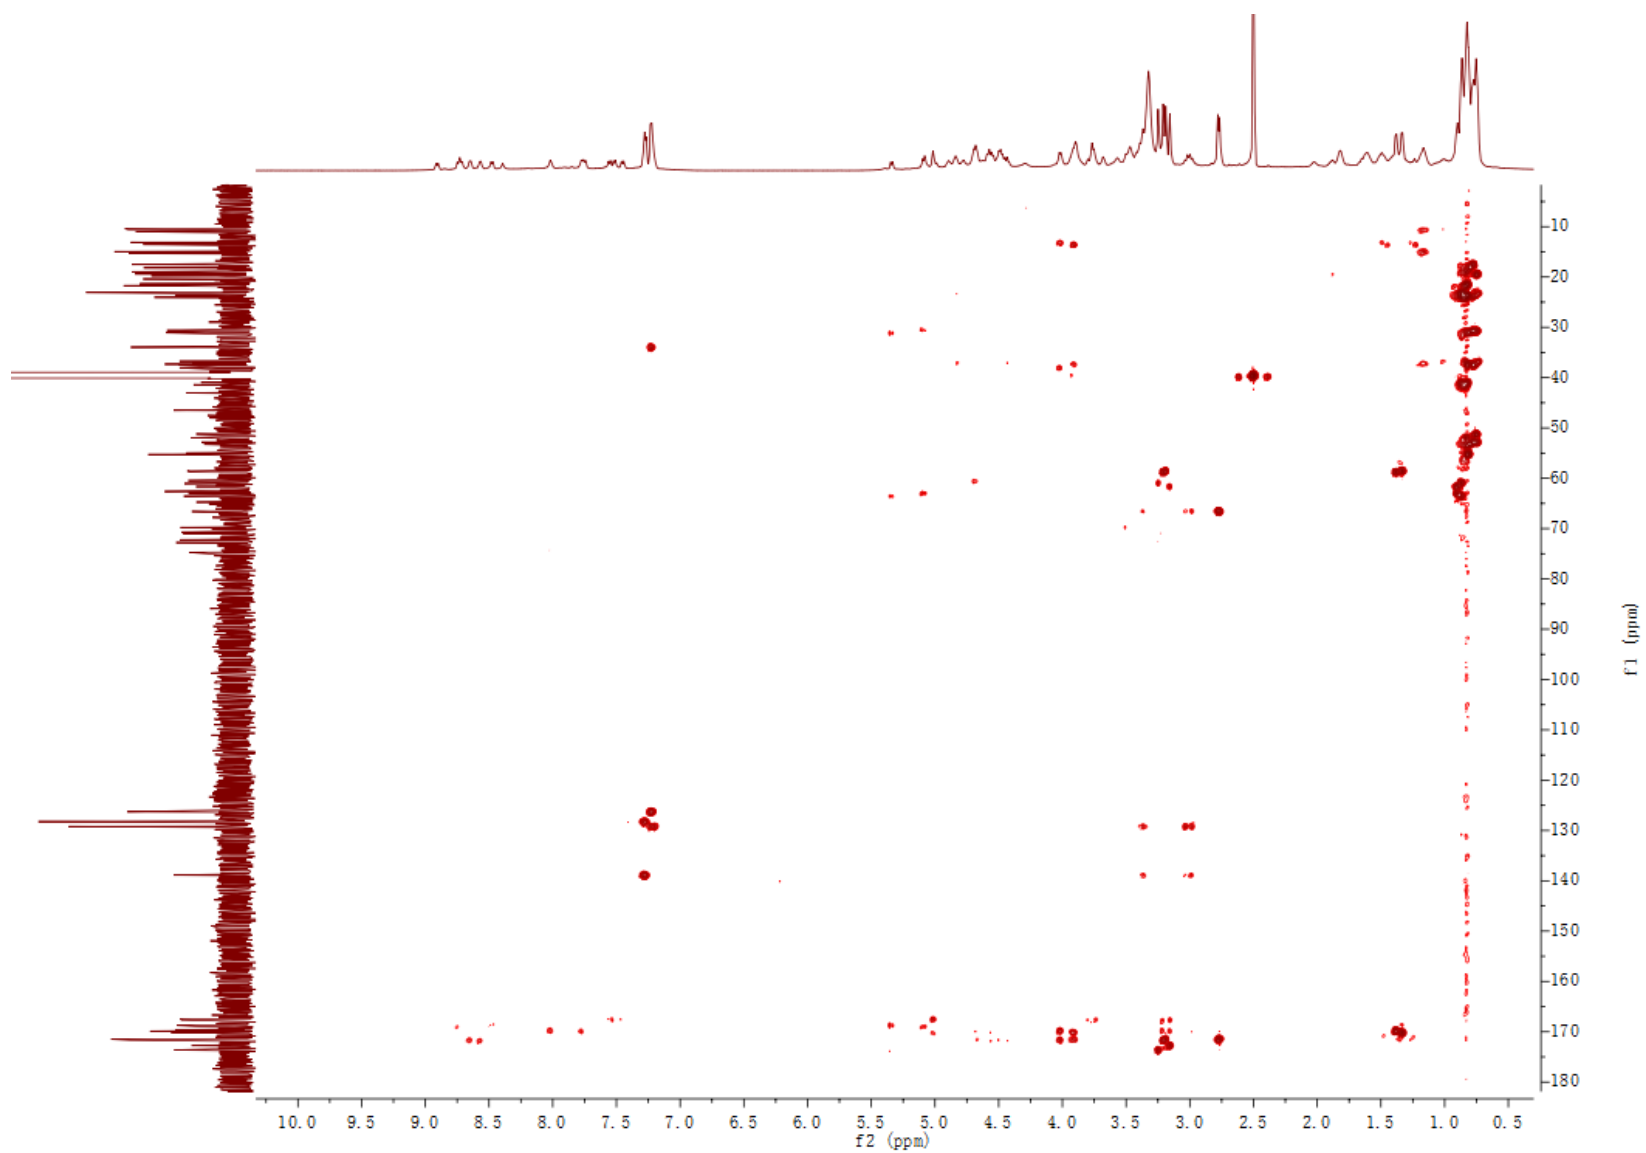

Figure S18.30. HMBC spectrum of the mixture of 5 and 10 in DMSO- $d_6$

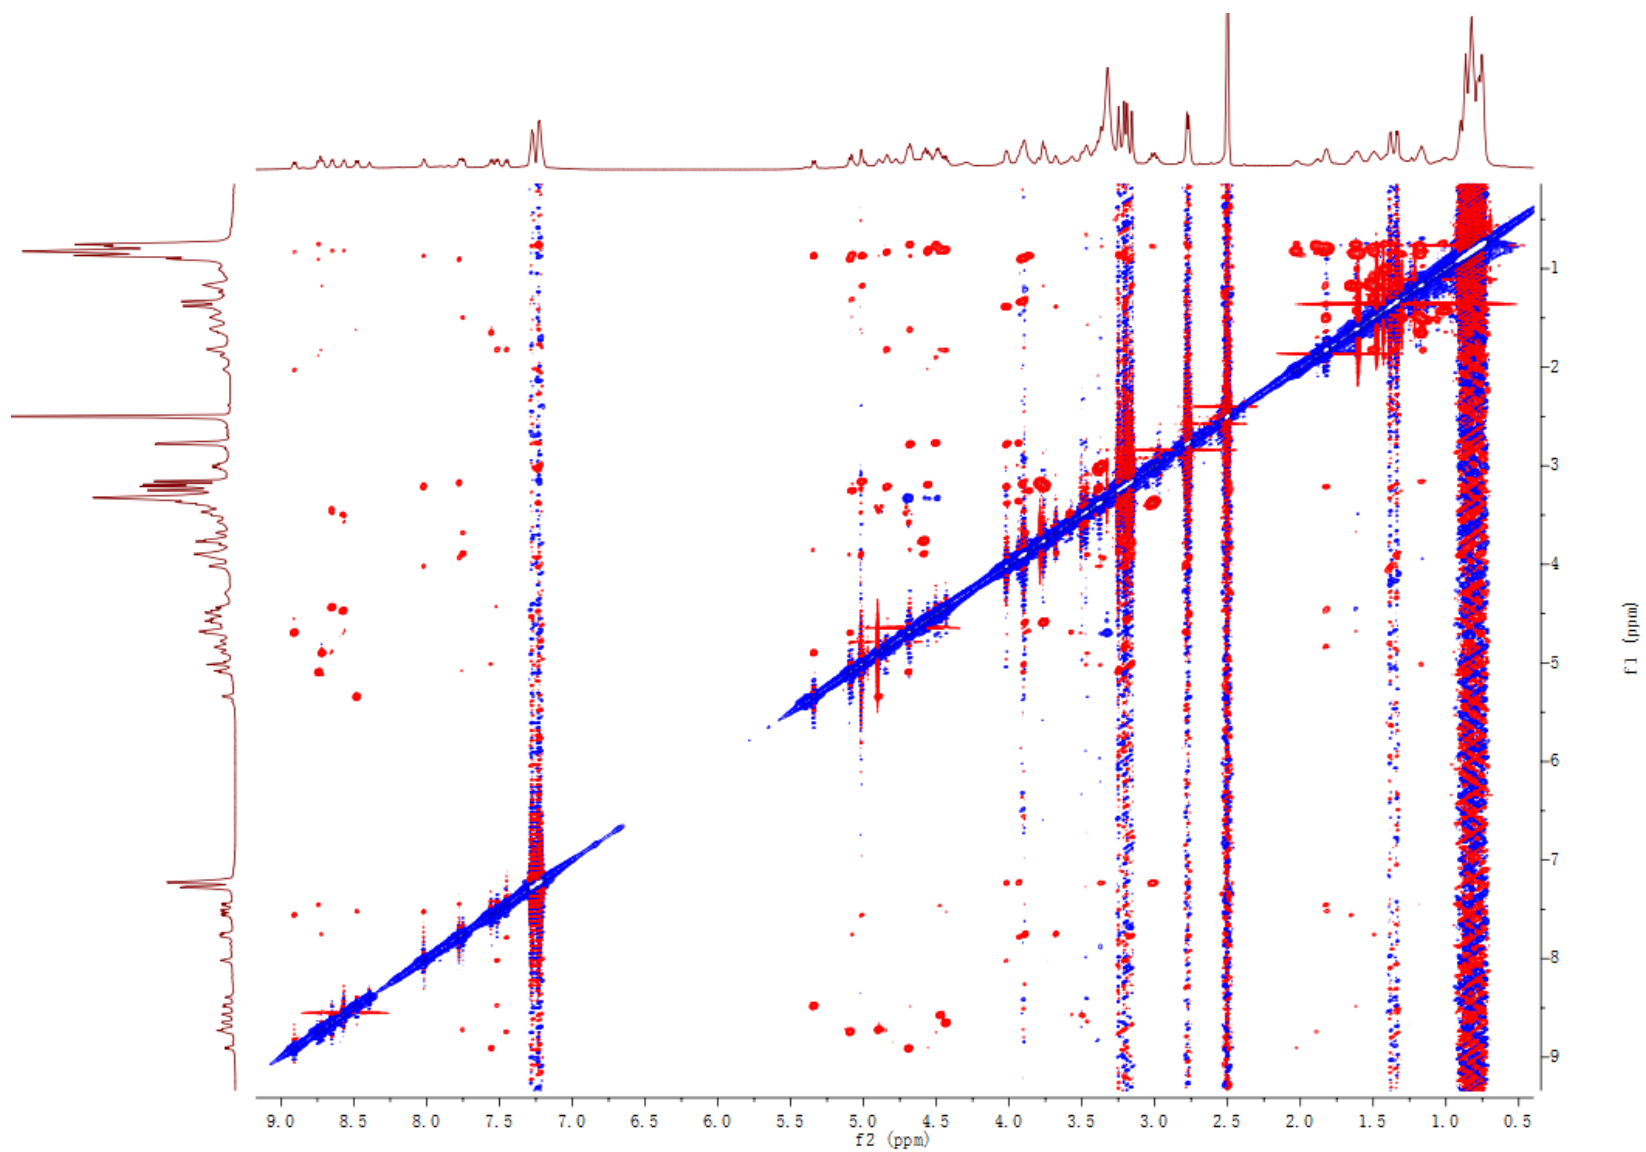

Figure S18.31. ROESY spectrum of the mixture of 5 and 10 in DMSO-*d*<sub>6</sub>

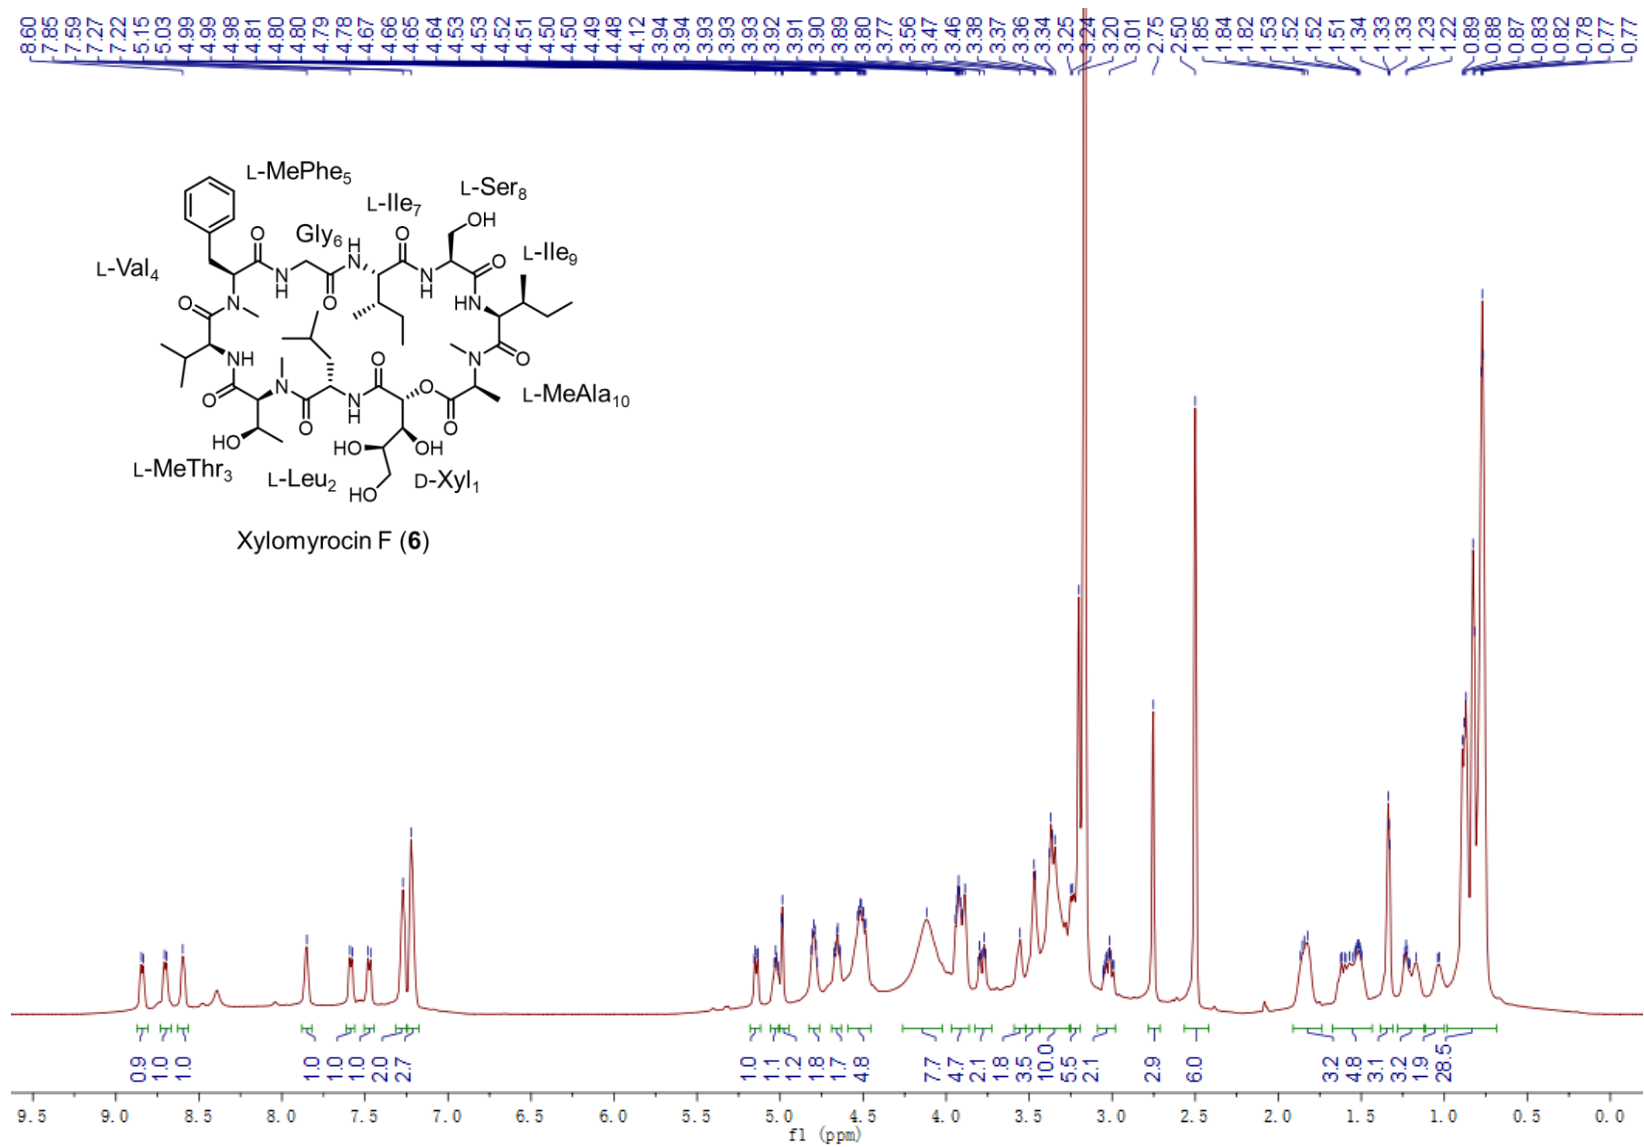

Figure S18.32. <sup>1</sup>H NMR spectrum of 6 in DMSO-*d*<sub>6</sub>

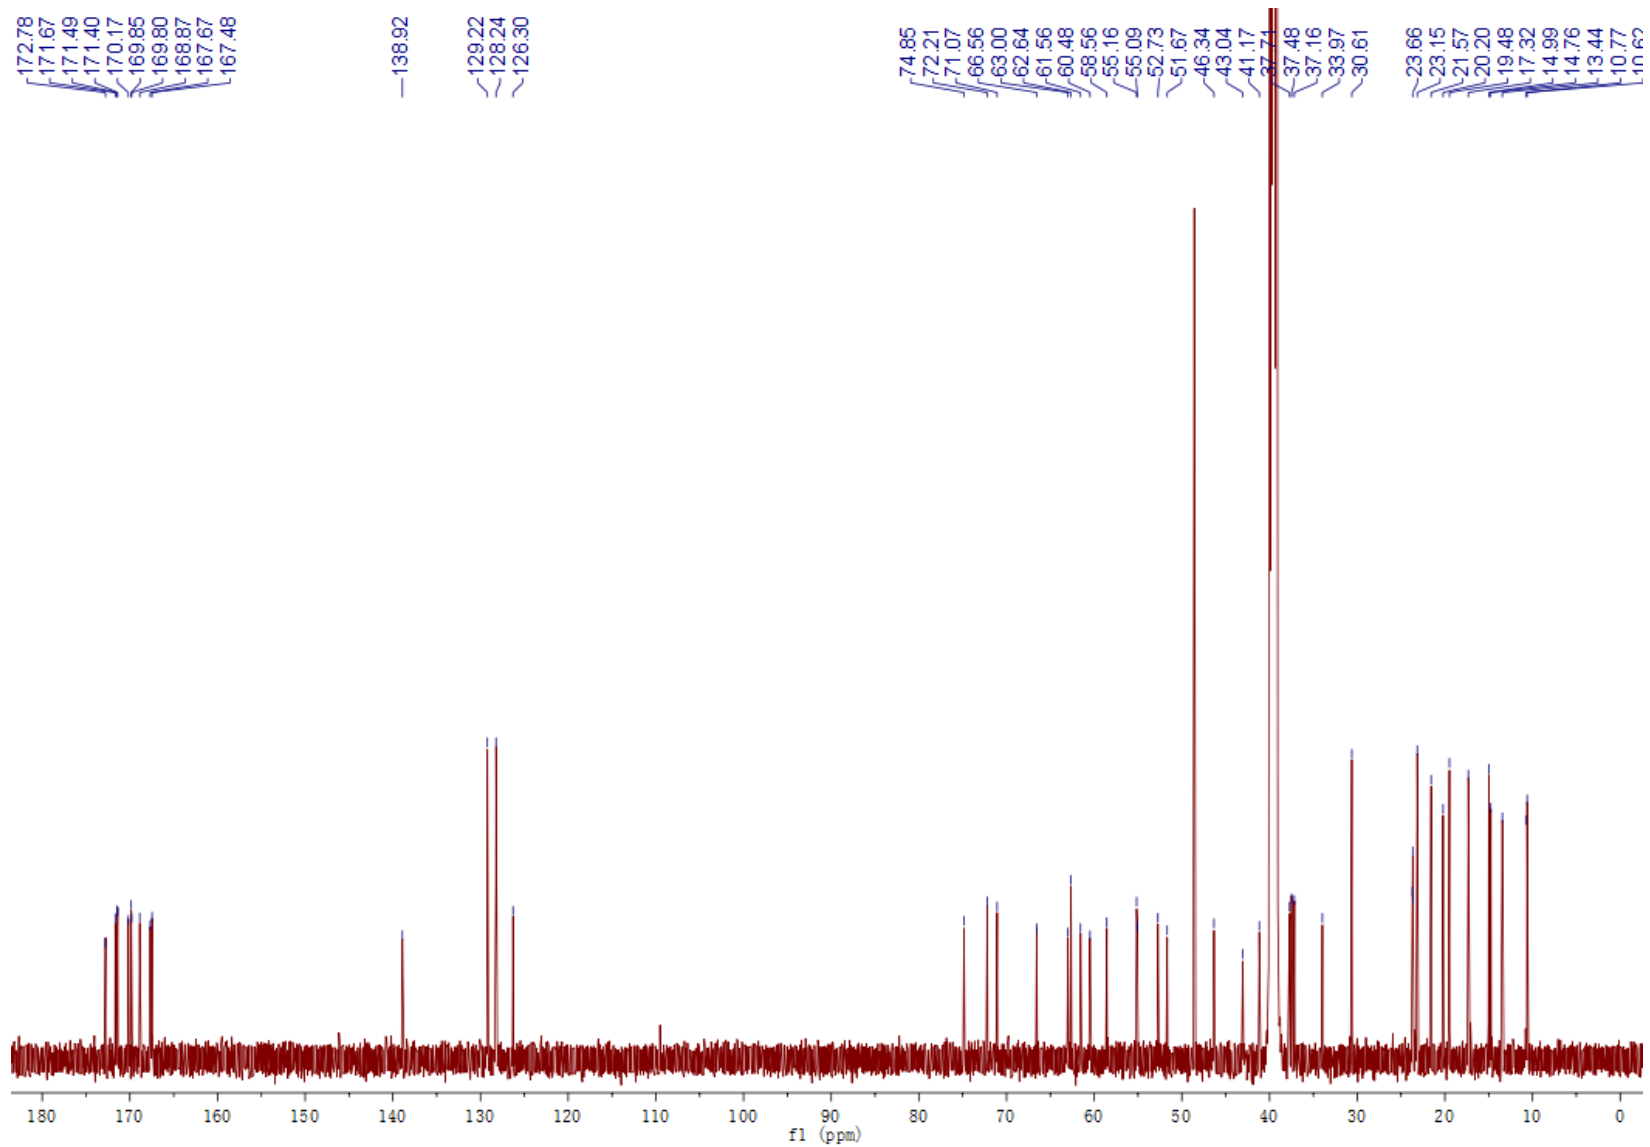

Figure S18.33.  $^{13}\text{C}$  NMR spectrum of 6 in  $\text{DMSO-}d_6$

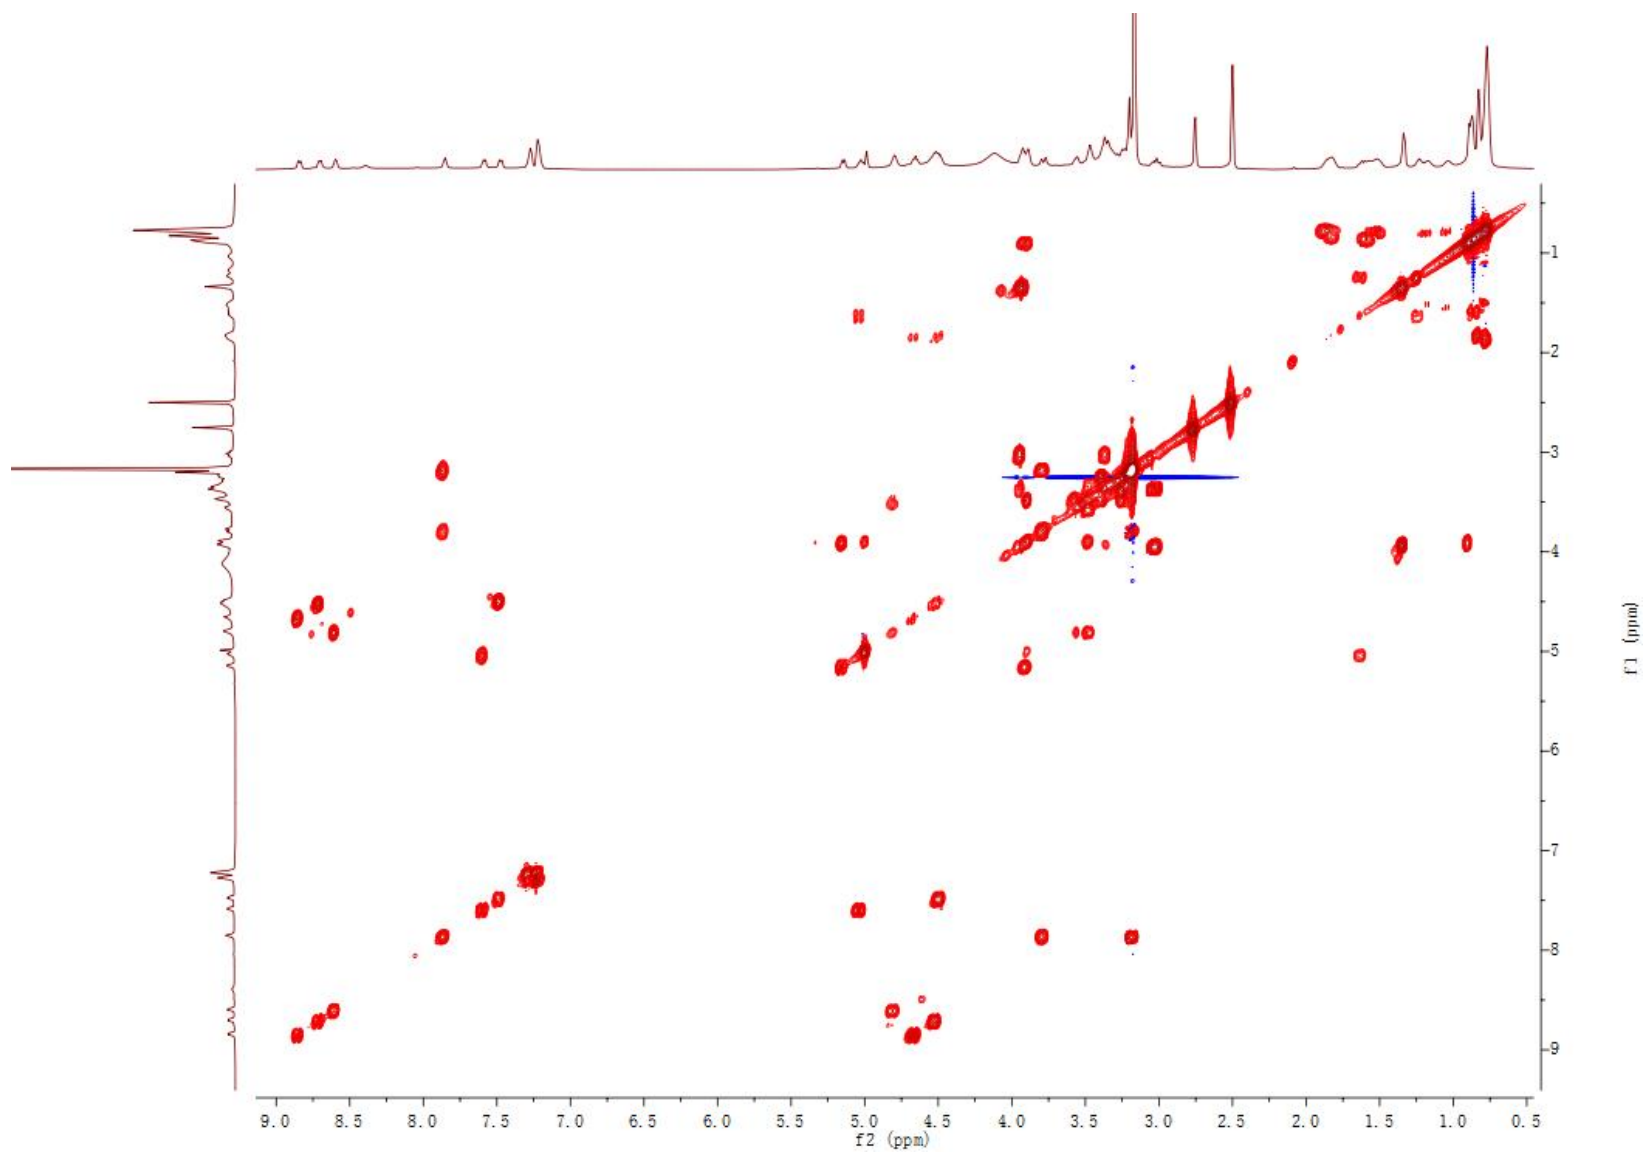

Figure S18.34.  $^1\text{H}$ - $^1\text{H}$  COSY spectrum of 6 in  $\text{DMSO-}d_6$

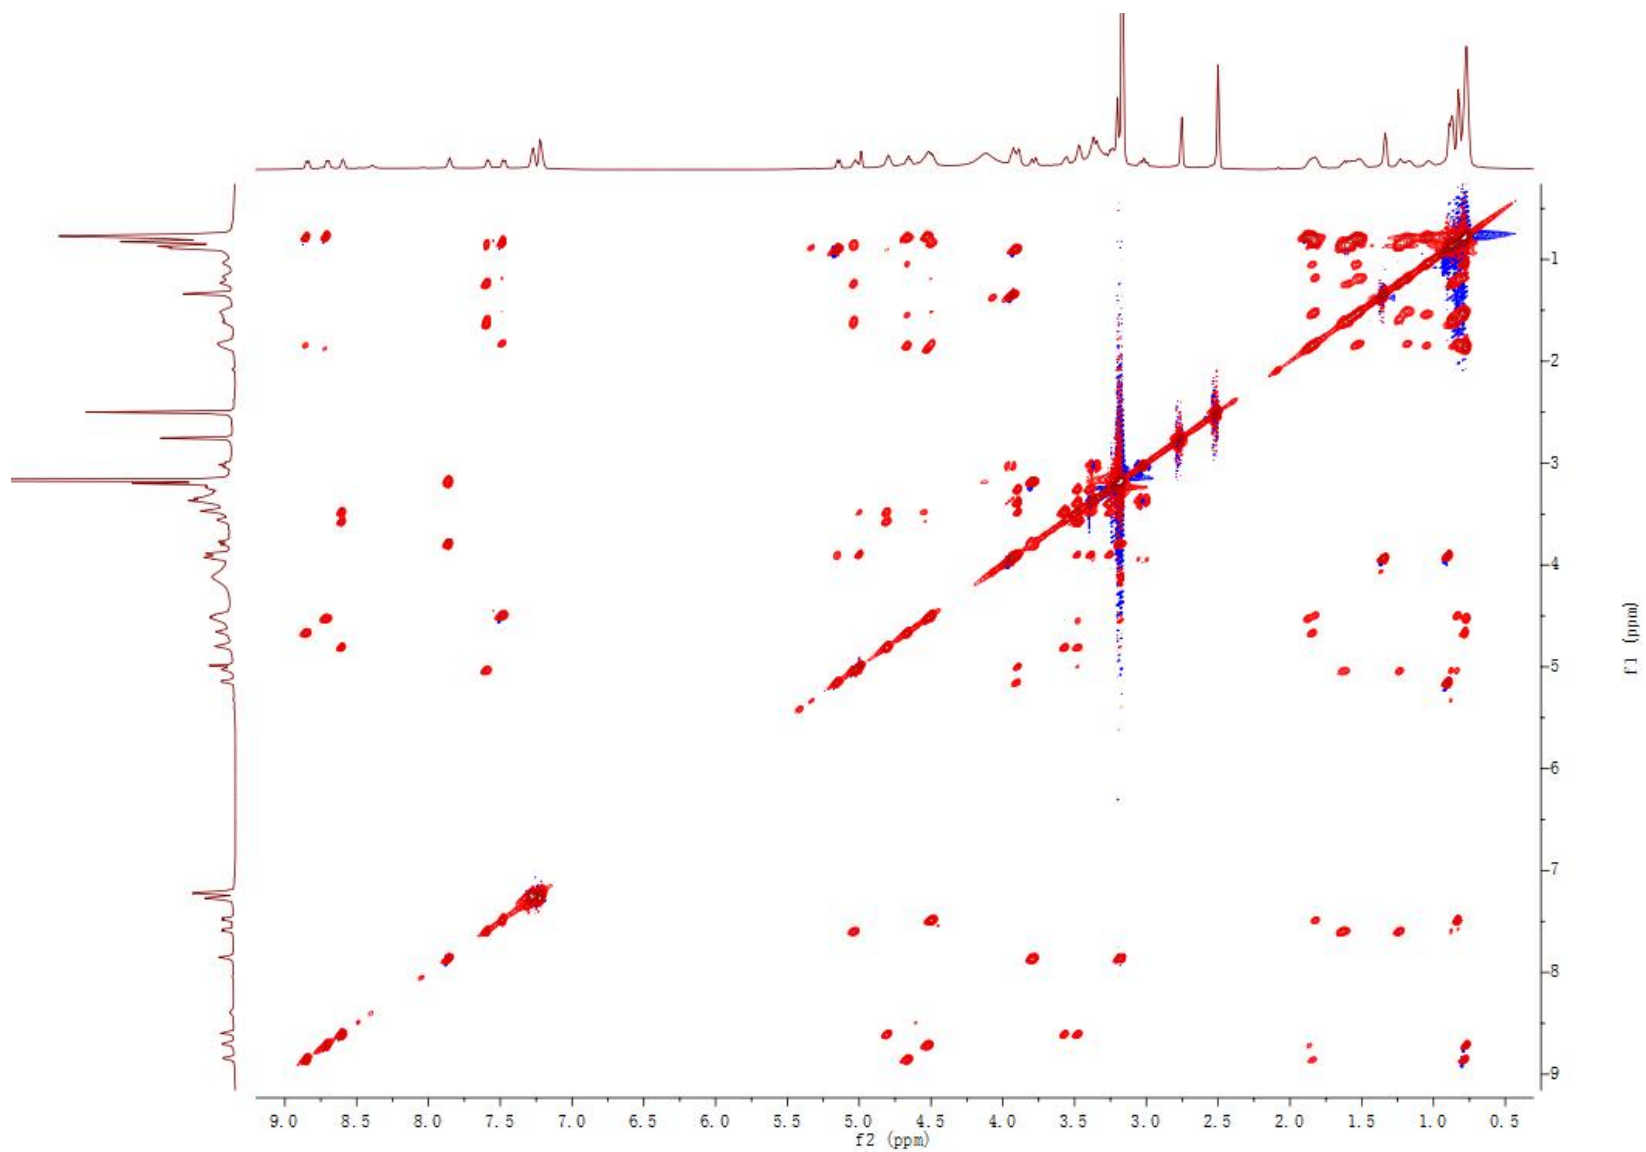

Figure S18.35.  $^1\text{H}$ - $^1\text{H}$  TOCSY spectrum of 6 in  $\text{DMSO-}d_6$



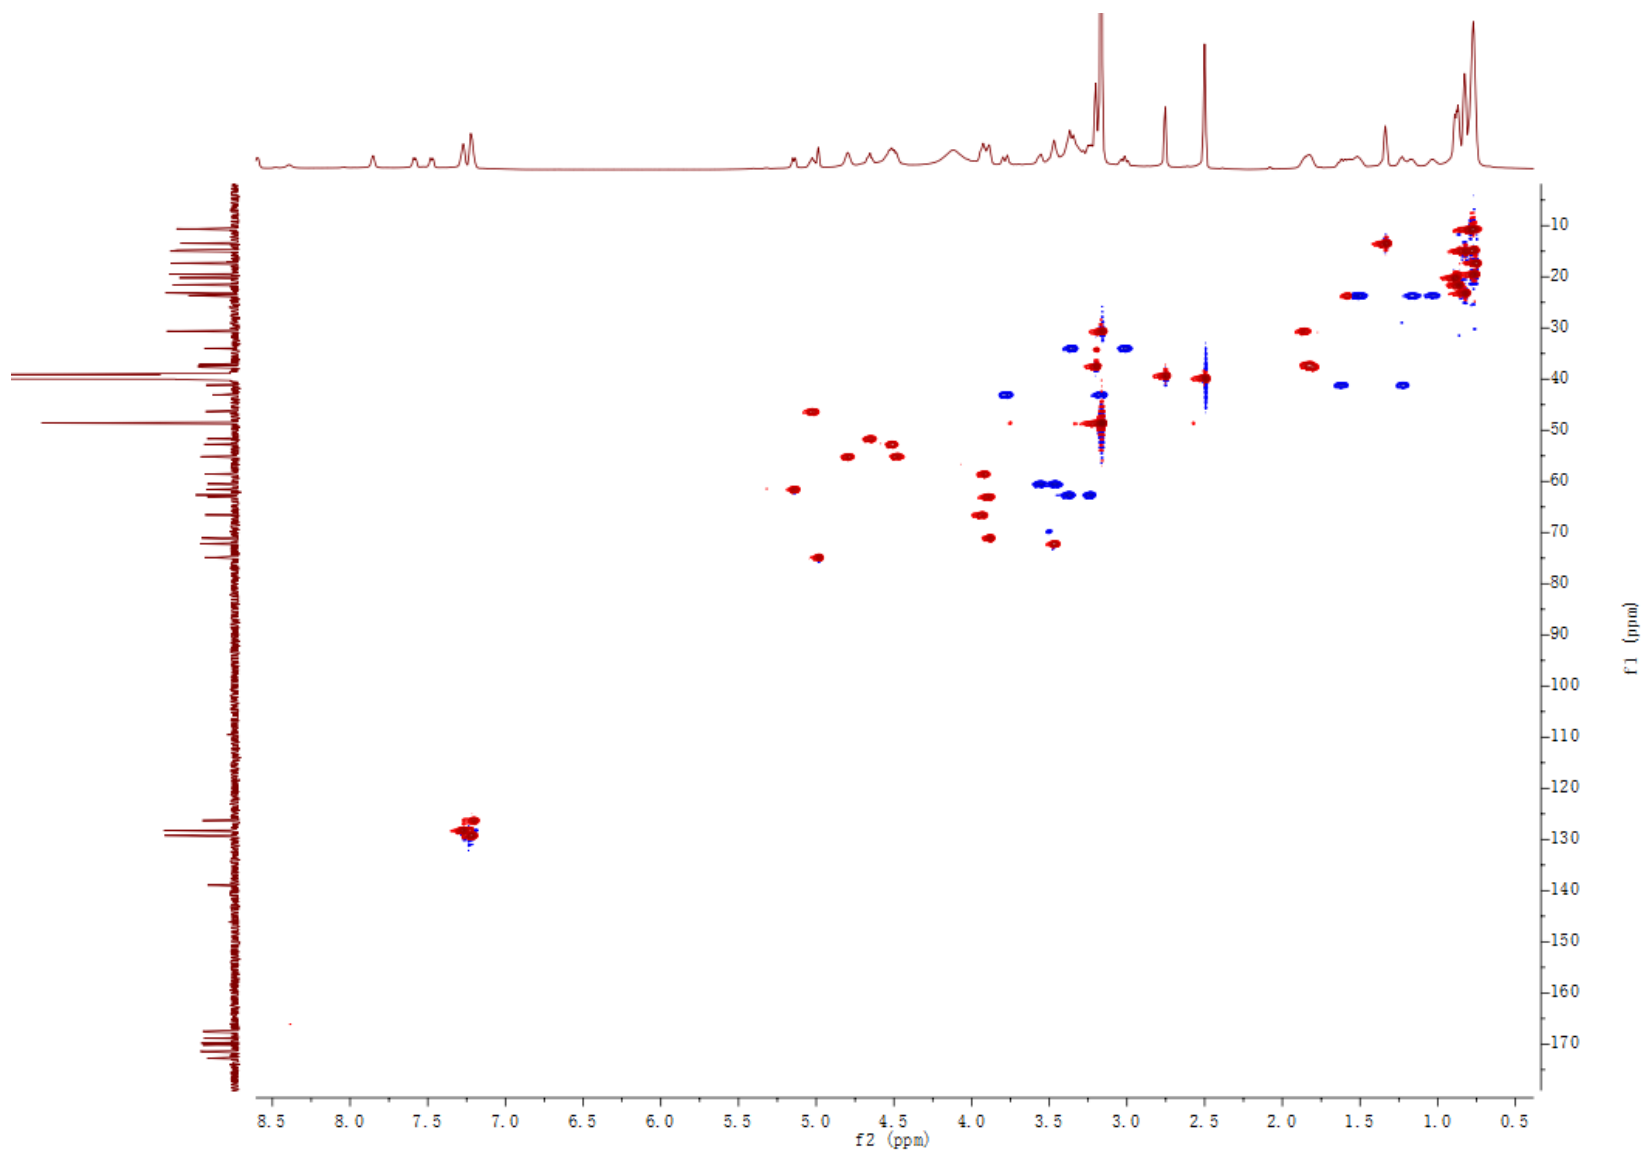

Figure S18.36. HSQC spectrum of 6 in DMSO- $d_6$

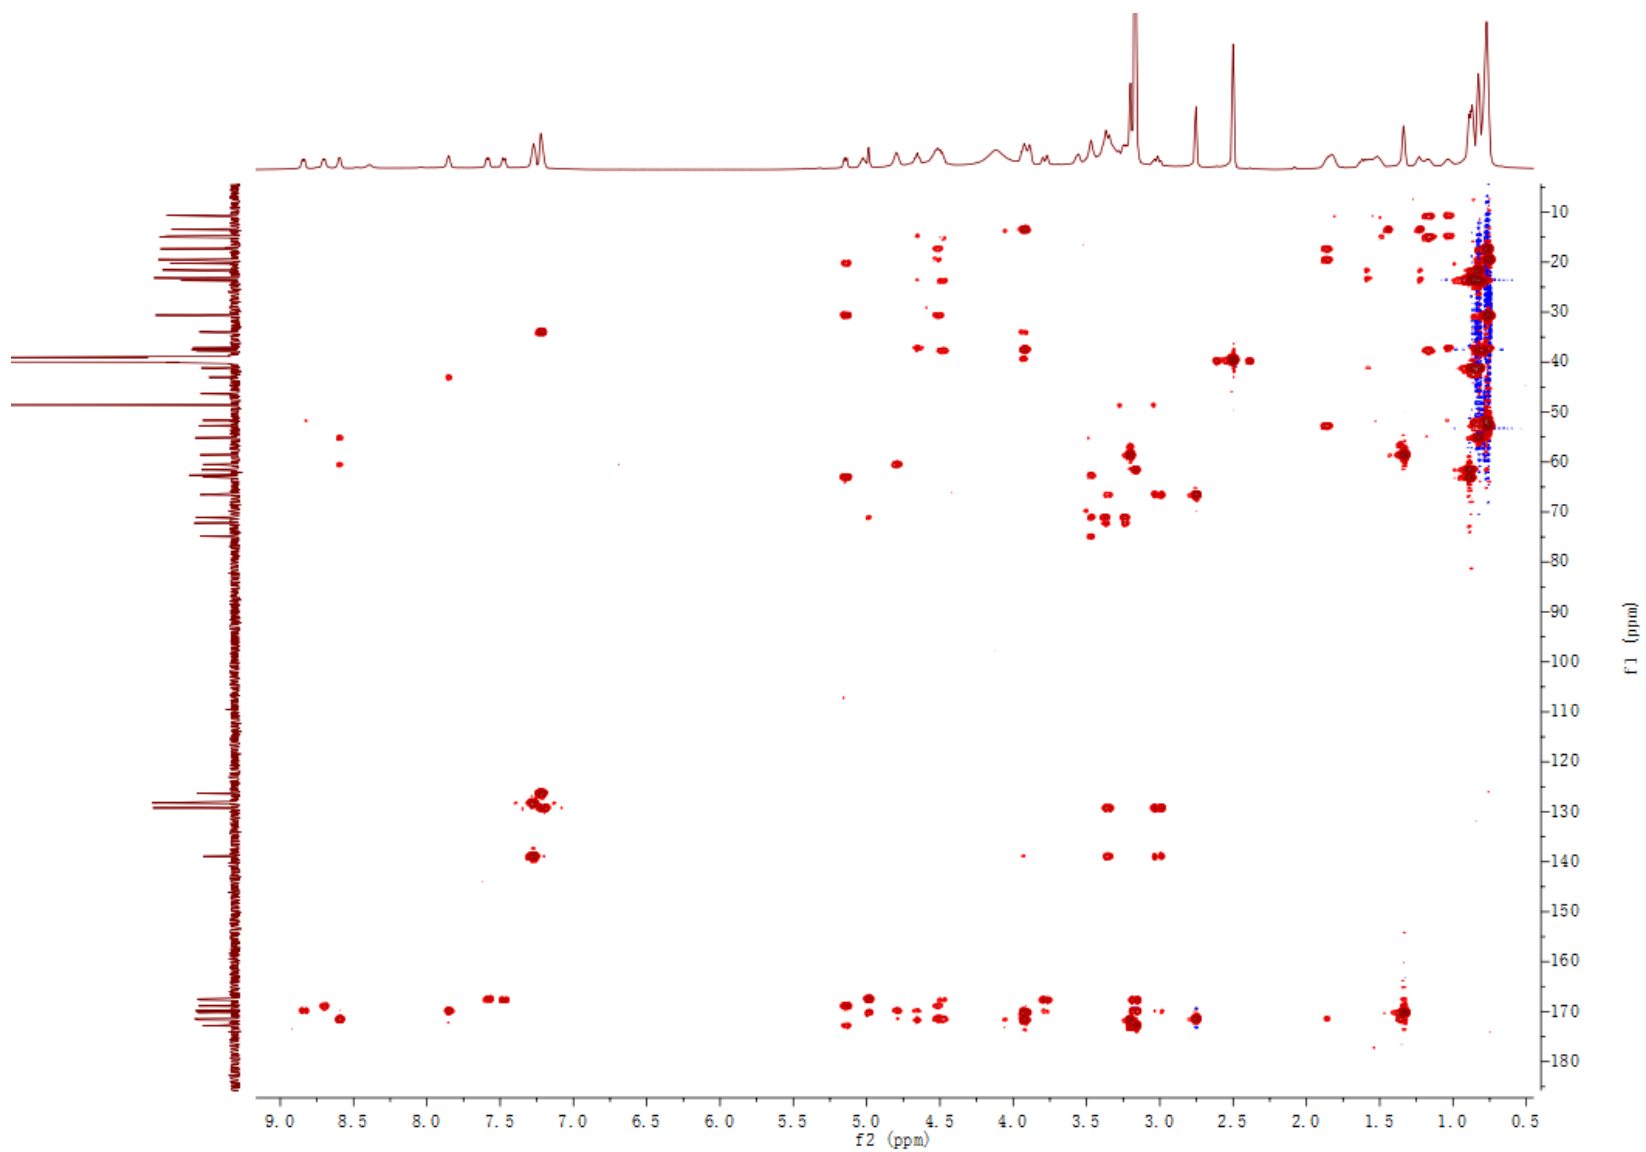

Figure S18.37. HMBC spectrum of 6 in DMSO- $d_6$

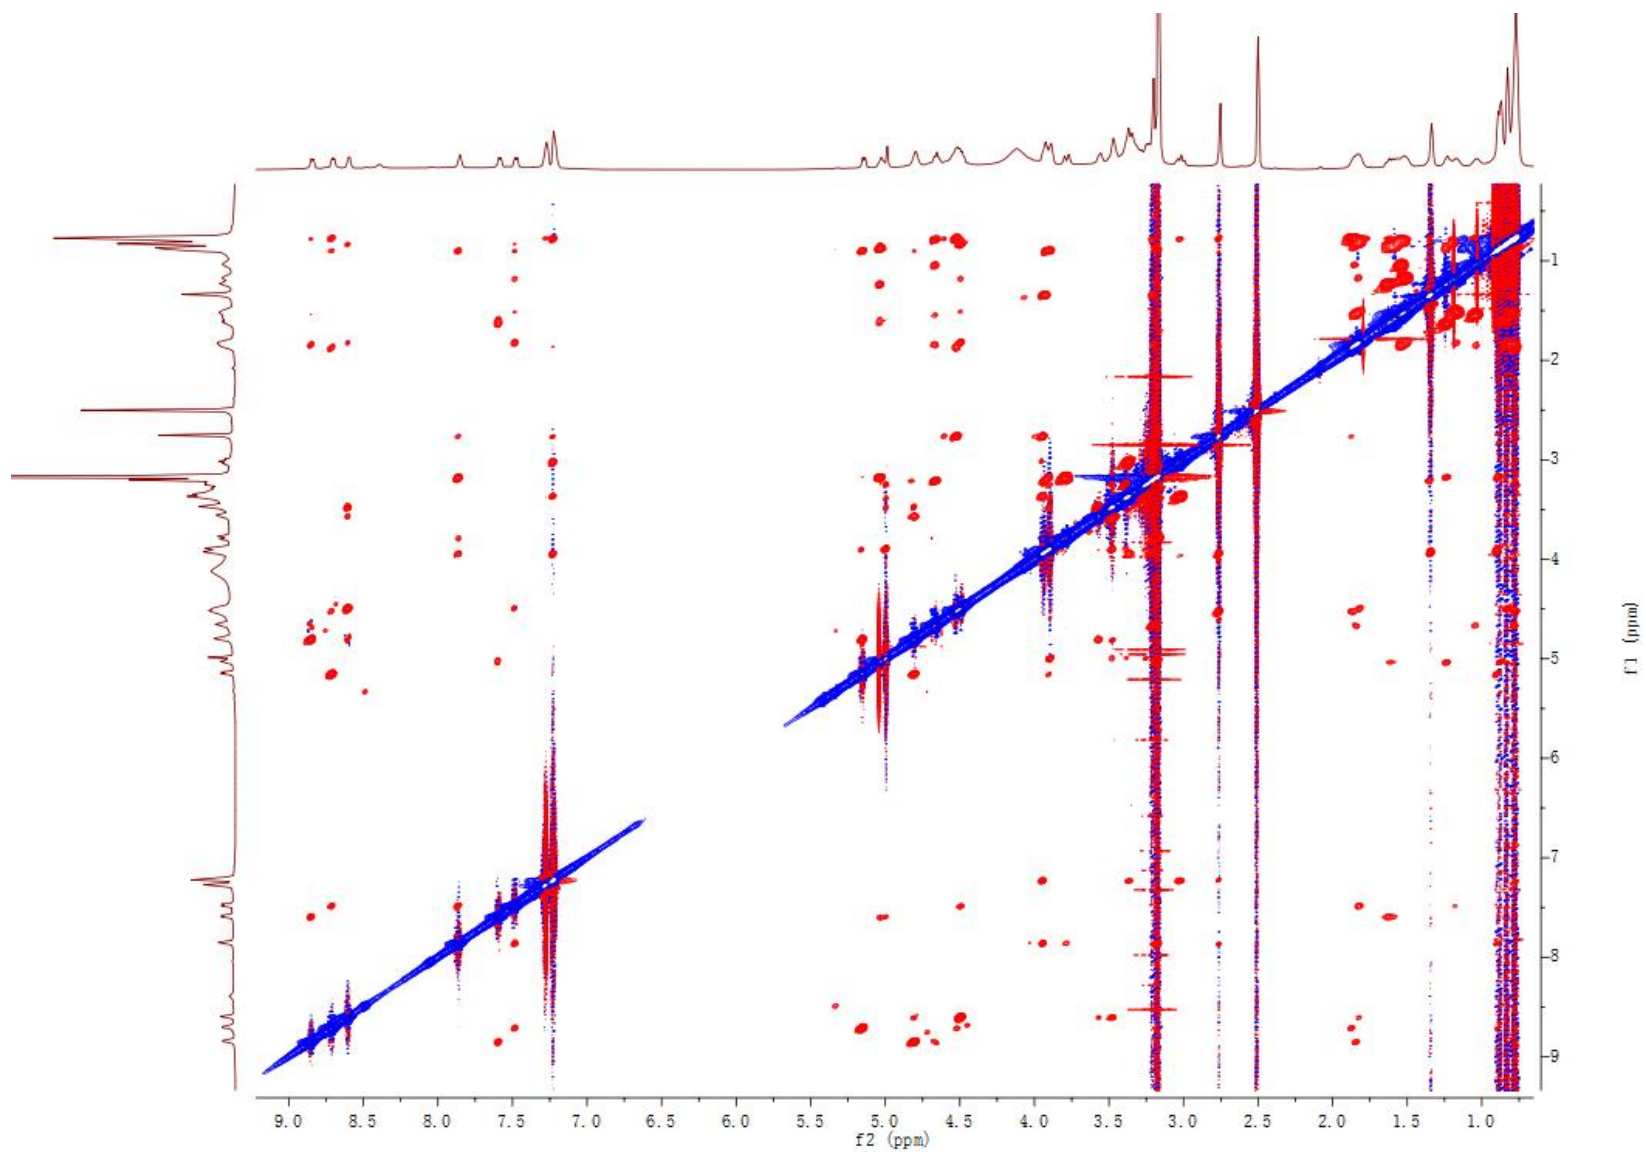

Figure S18.38. ROESY spectrum of 6 in DMSO- $d_6$

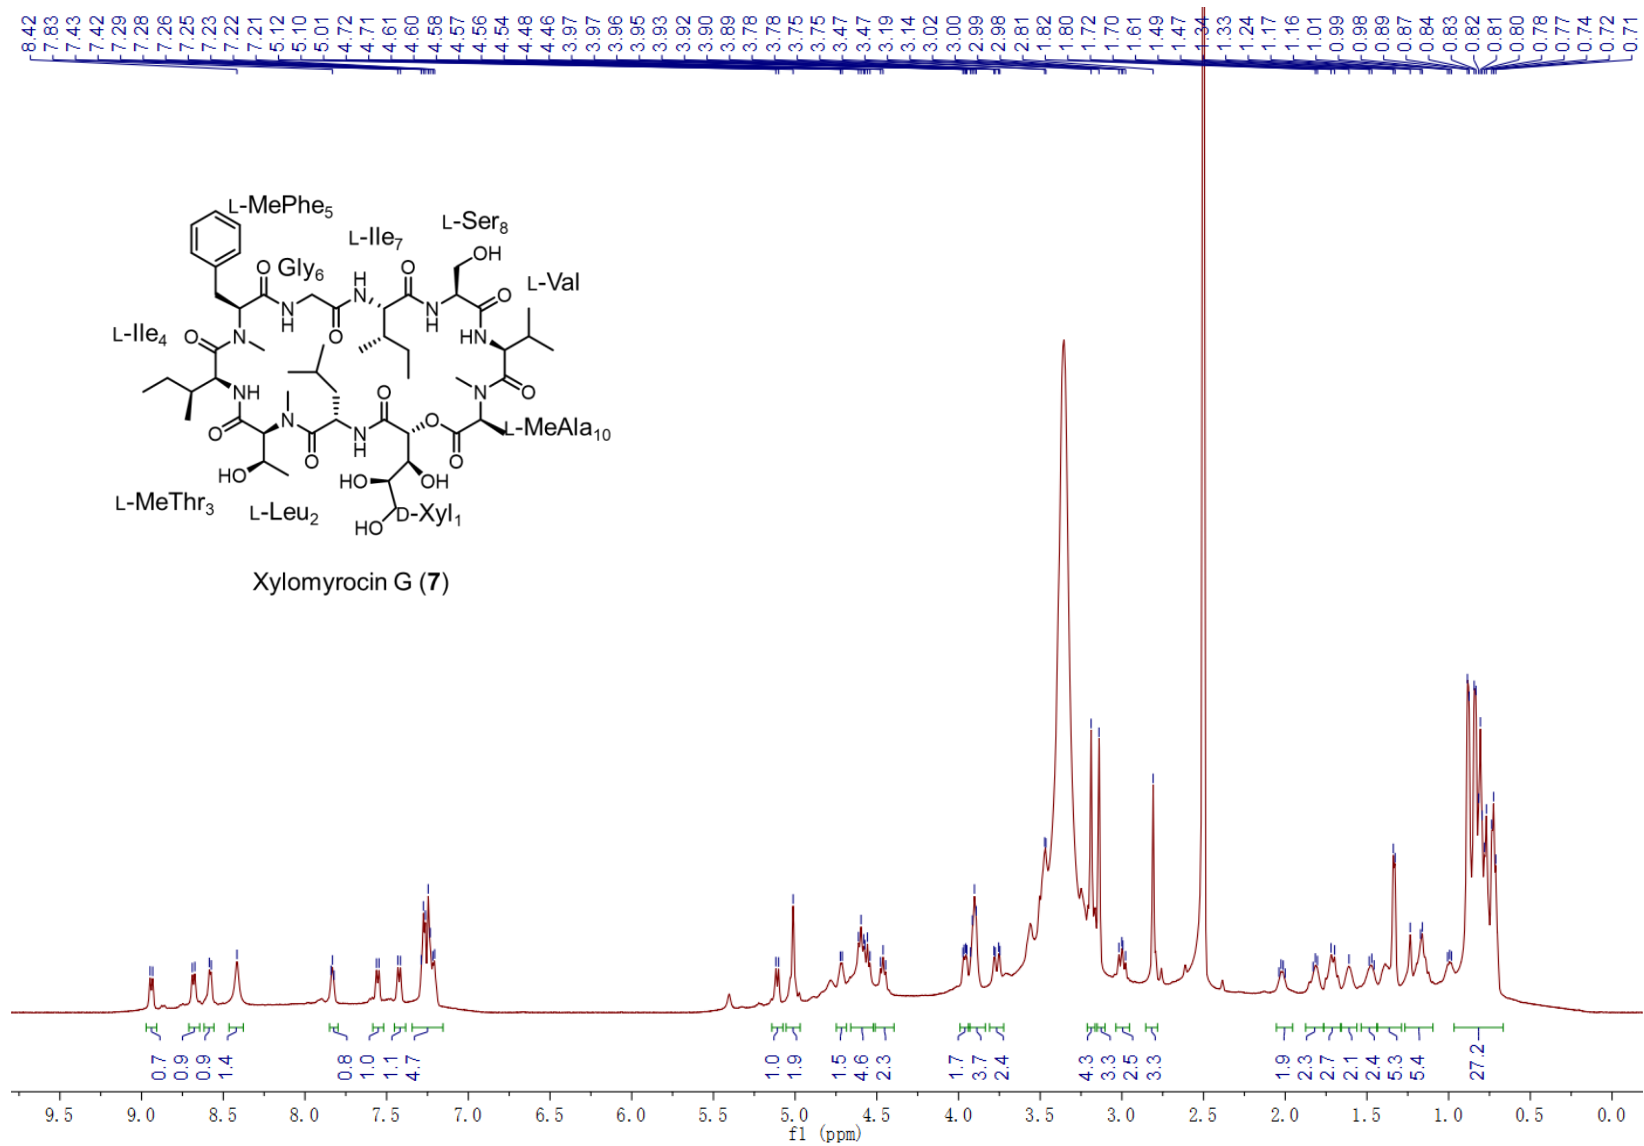

Figure S18.39. <sup>1</sup>H NMR spectrum of 7 in DMSO-*d*<sub>6</sub>

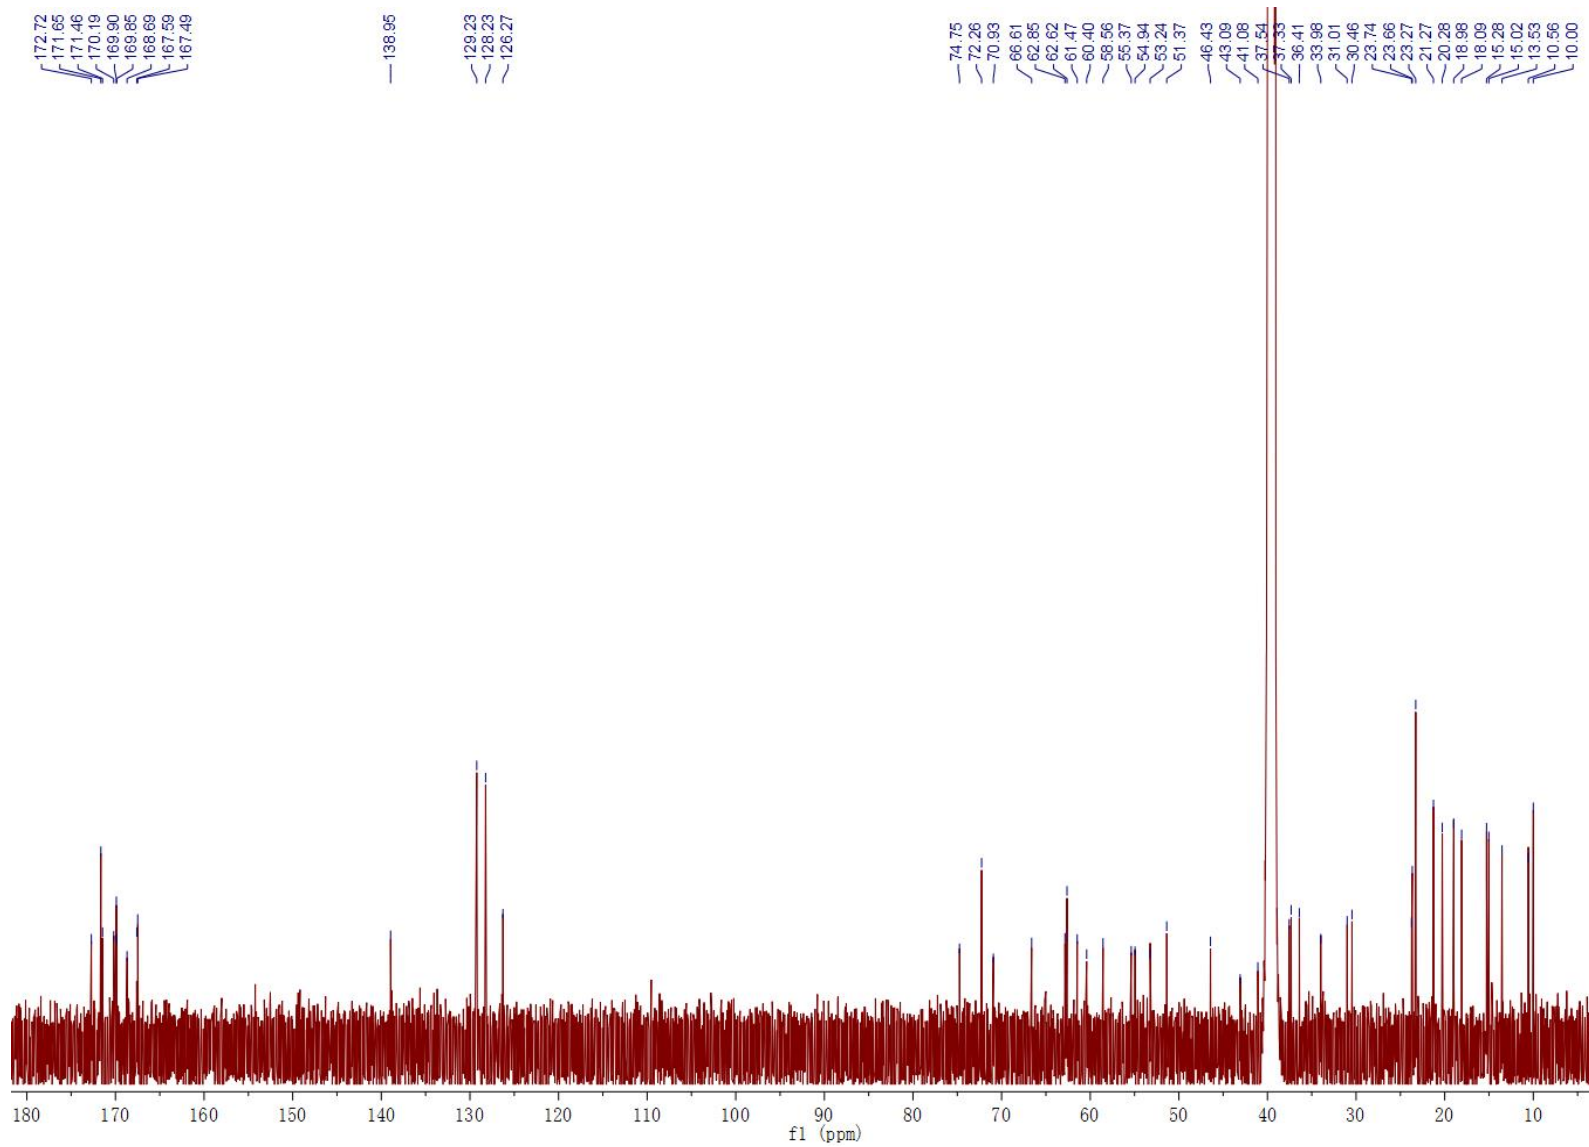

Figure S18.40.  $^{13}\text{C}$  NMR spectrum of 7 in  $\text{DMSO-}d_6$

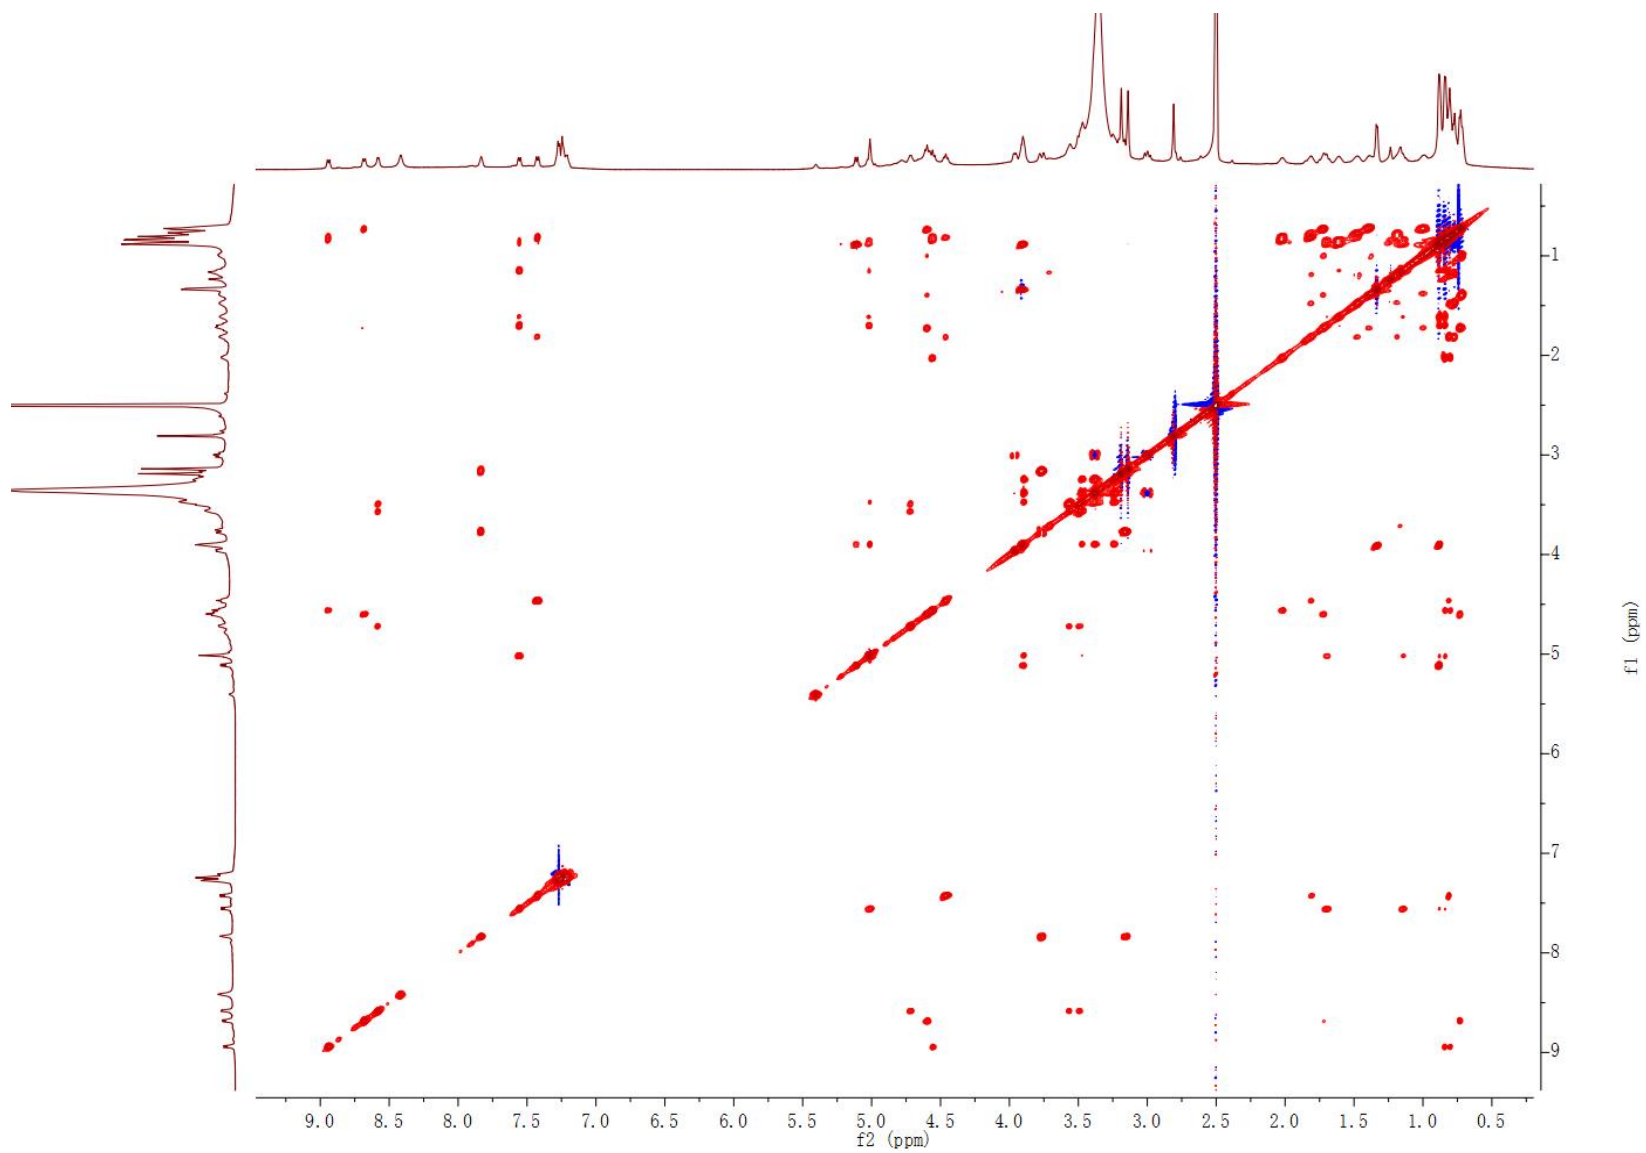

Figure S18.41.  $^1\text{H}$ - $^1\text{H}$  TOCSY spectrum of 7 in  $\text{DMSO-}d_6$

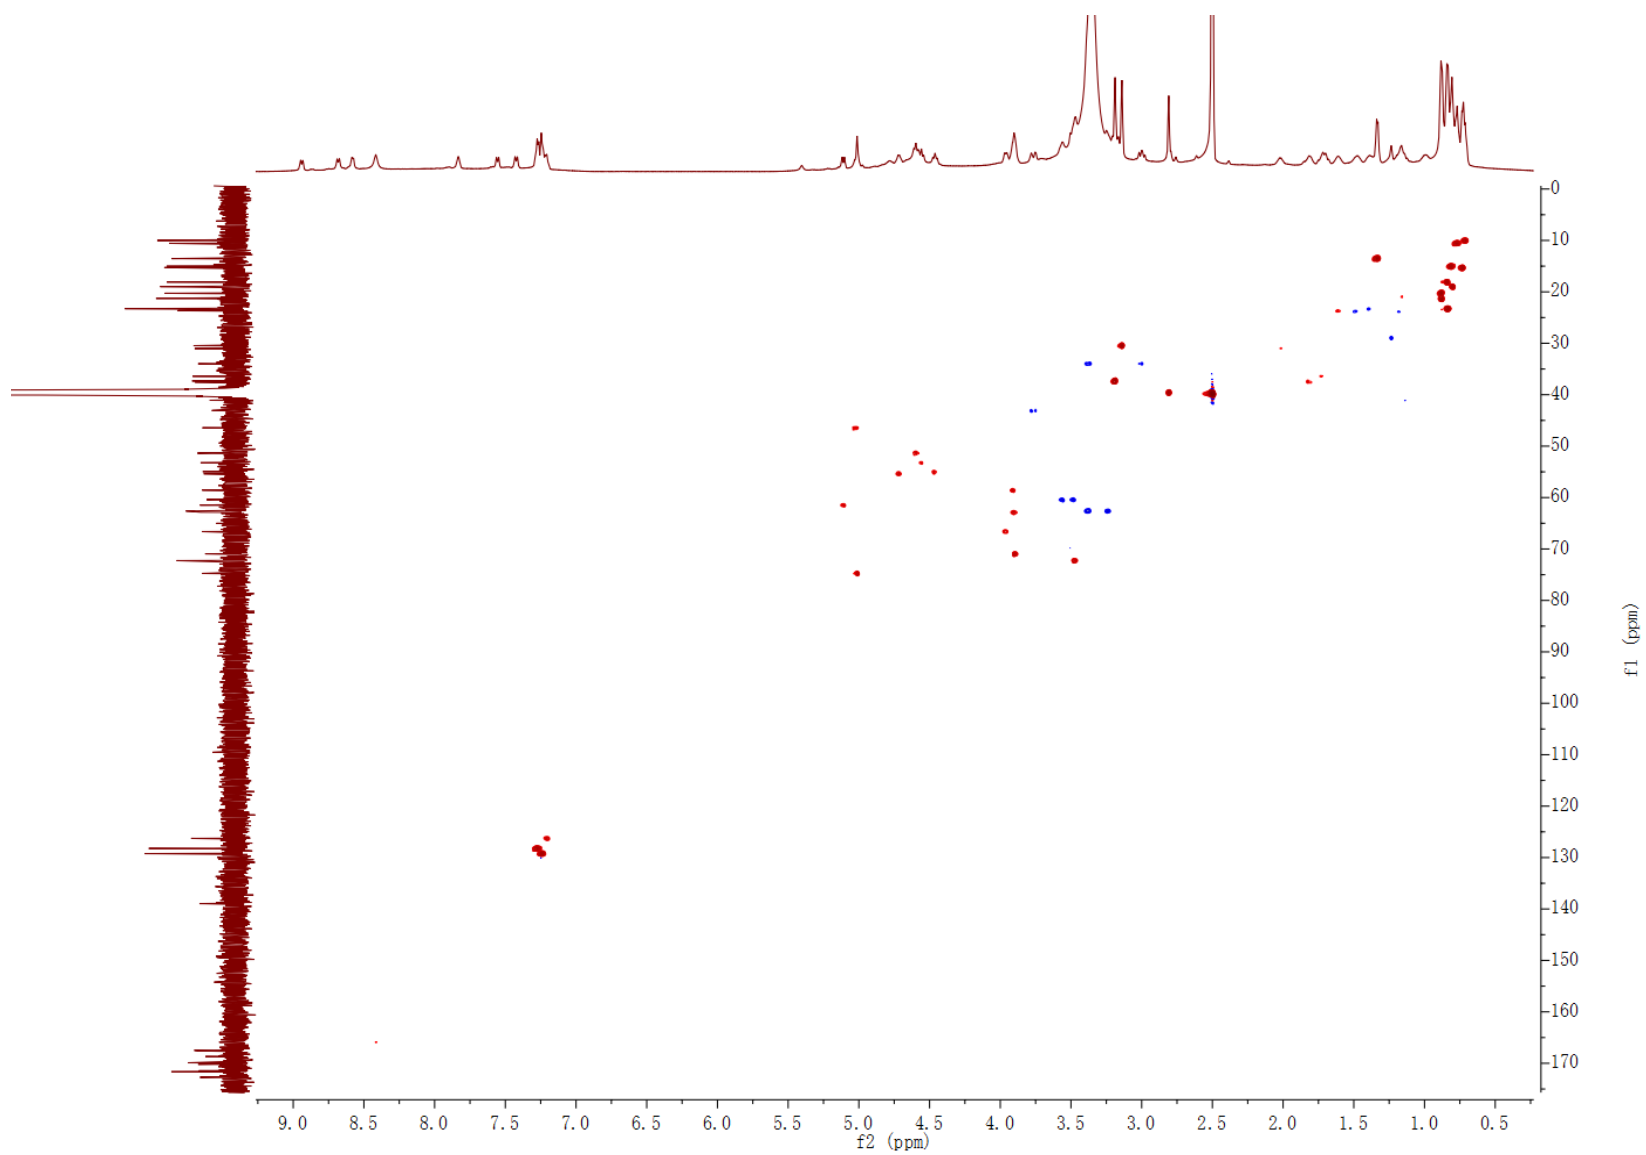

Figure S18.42. HSQC spectrum of **7** in DMSO-*d*<sub>6</sub>

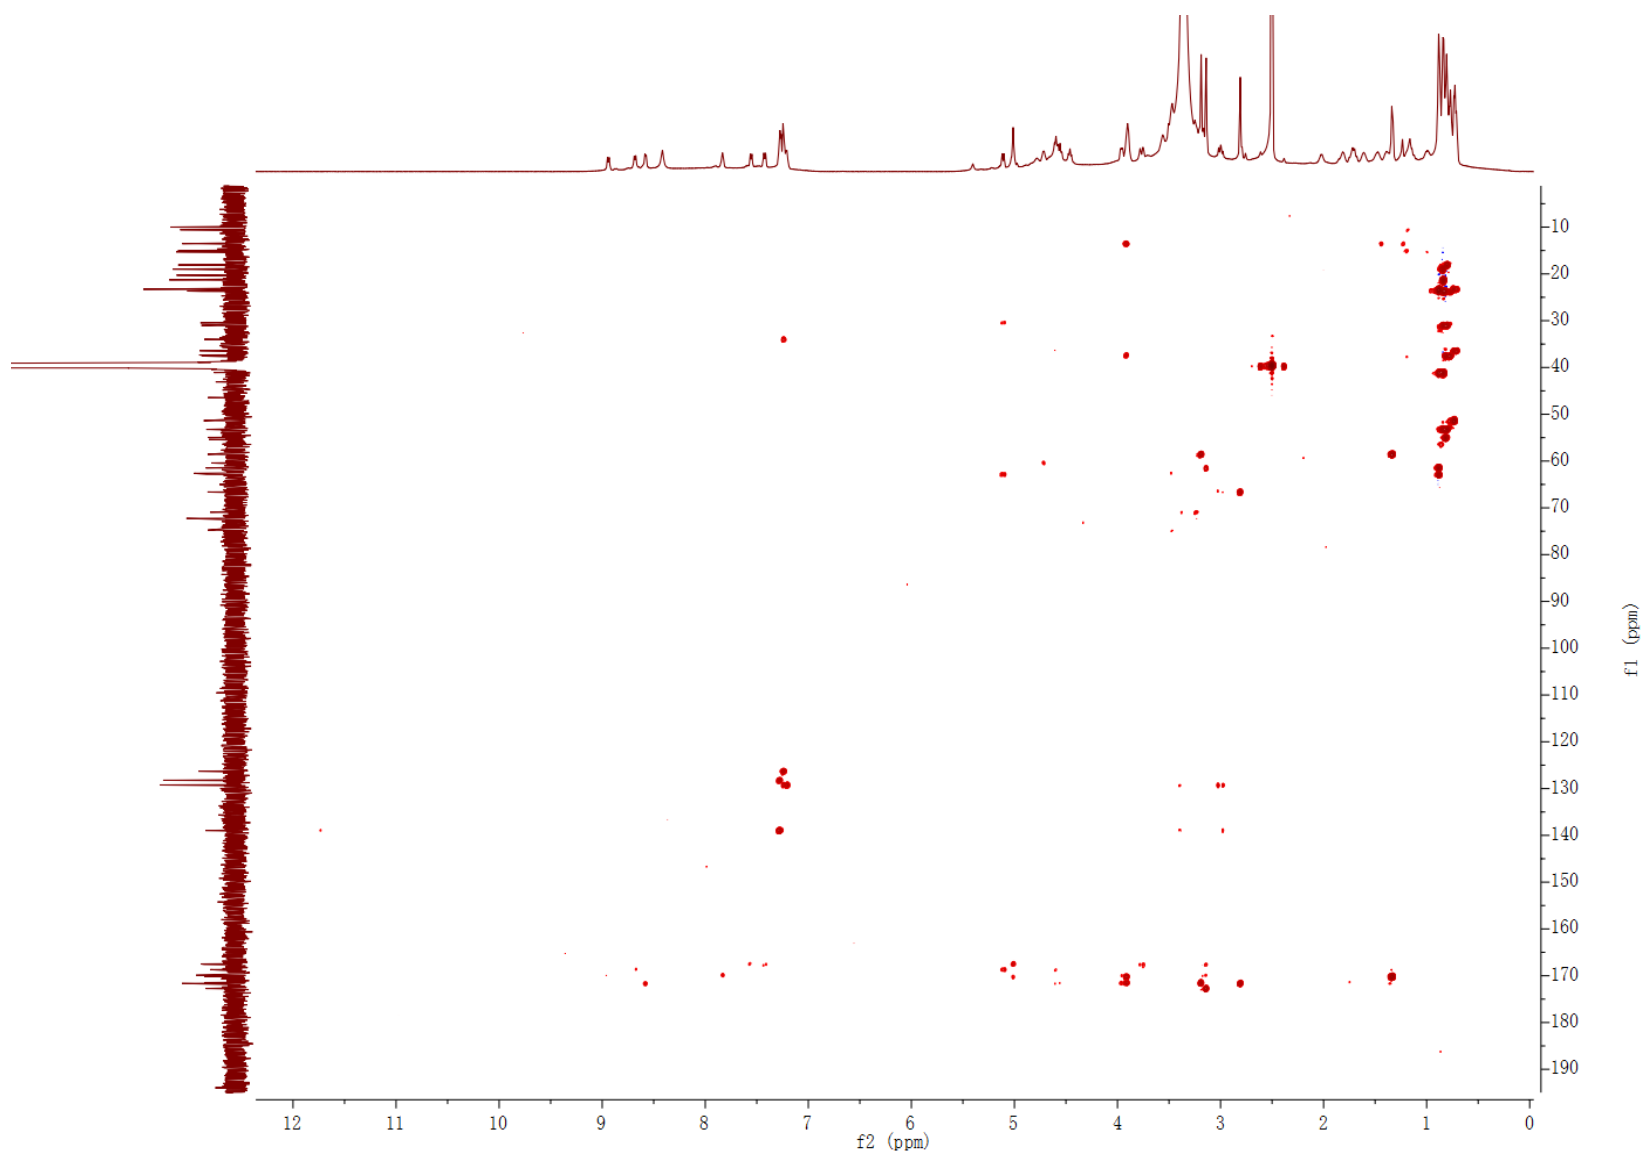

Figure S18.43. HMBC spectrum of 7 in DMSO- $d_6$



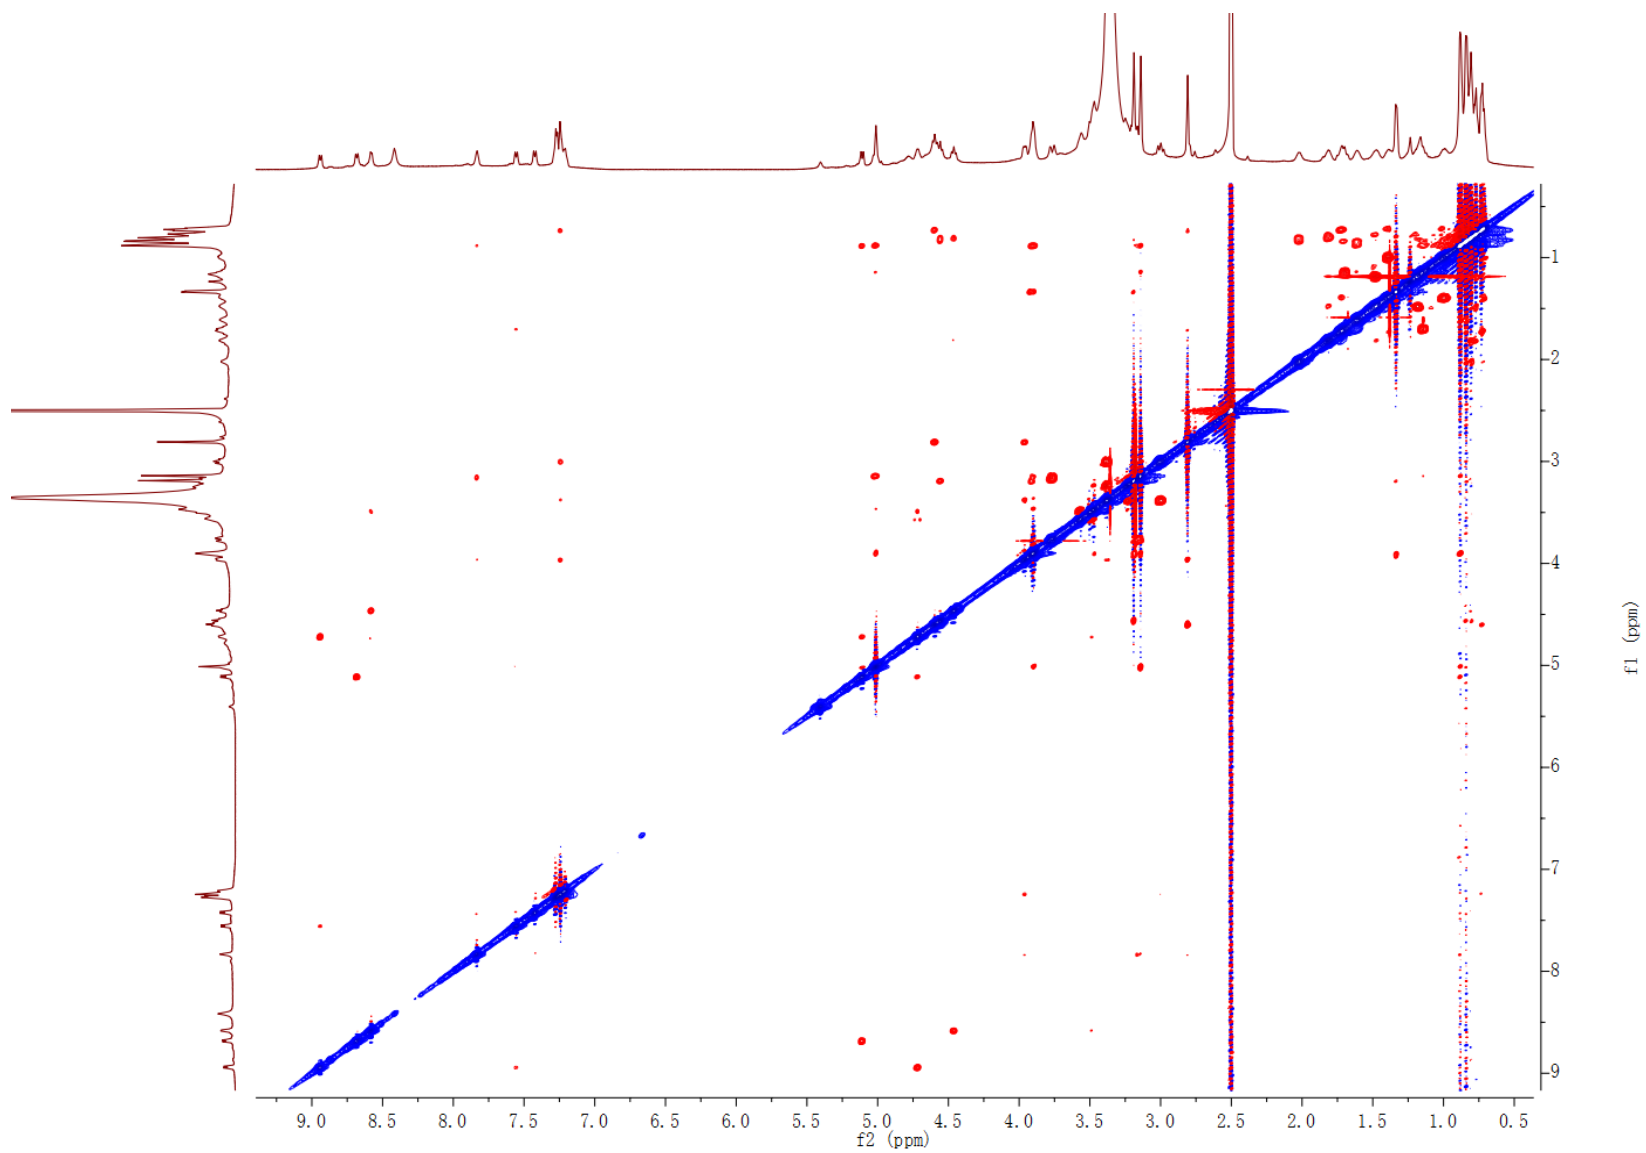

Figure S18.44. ROESY spectrum of 7 in DMSO-*d*<sub>6</sub>

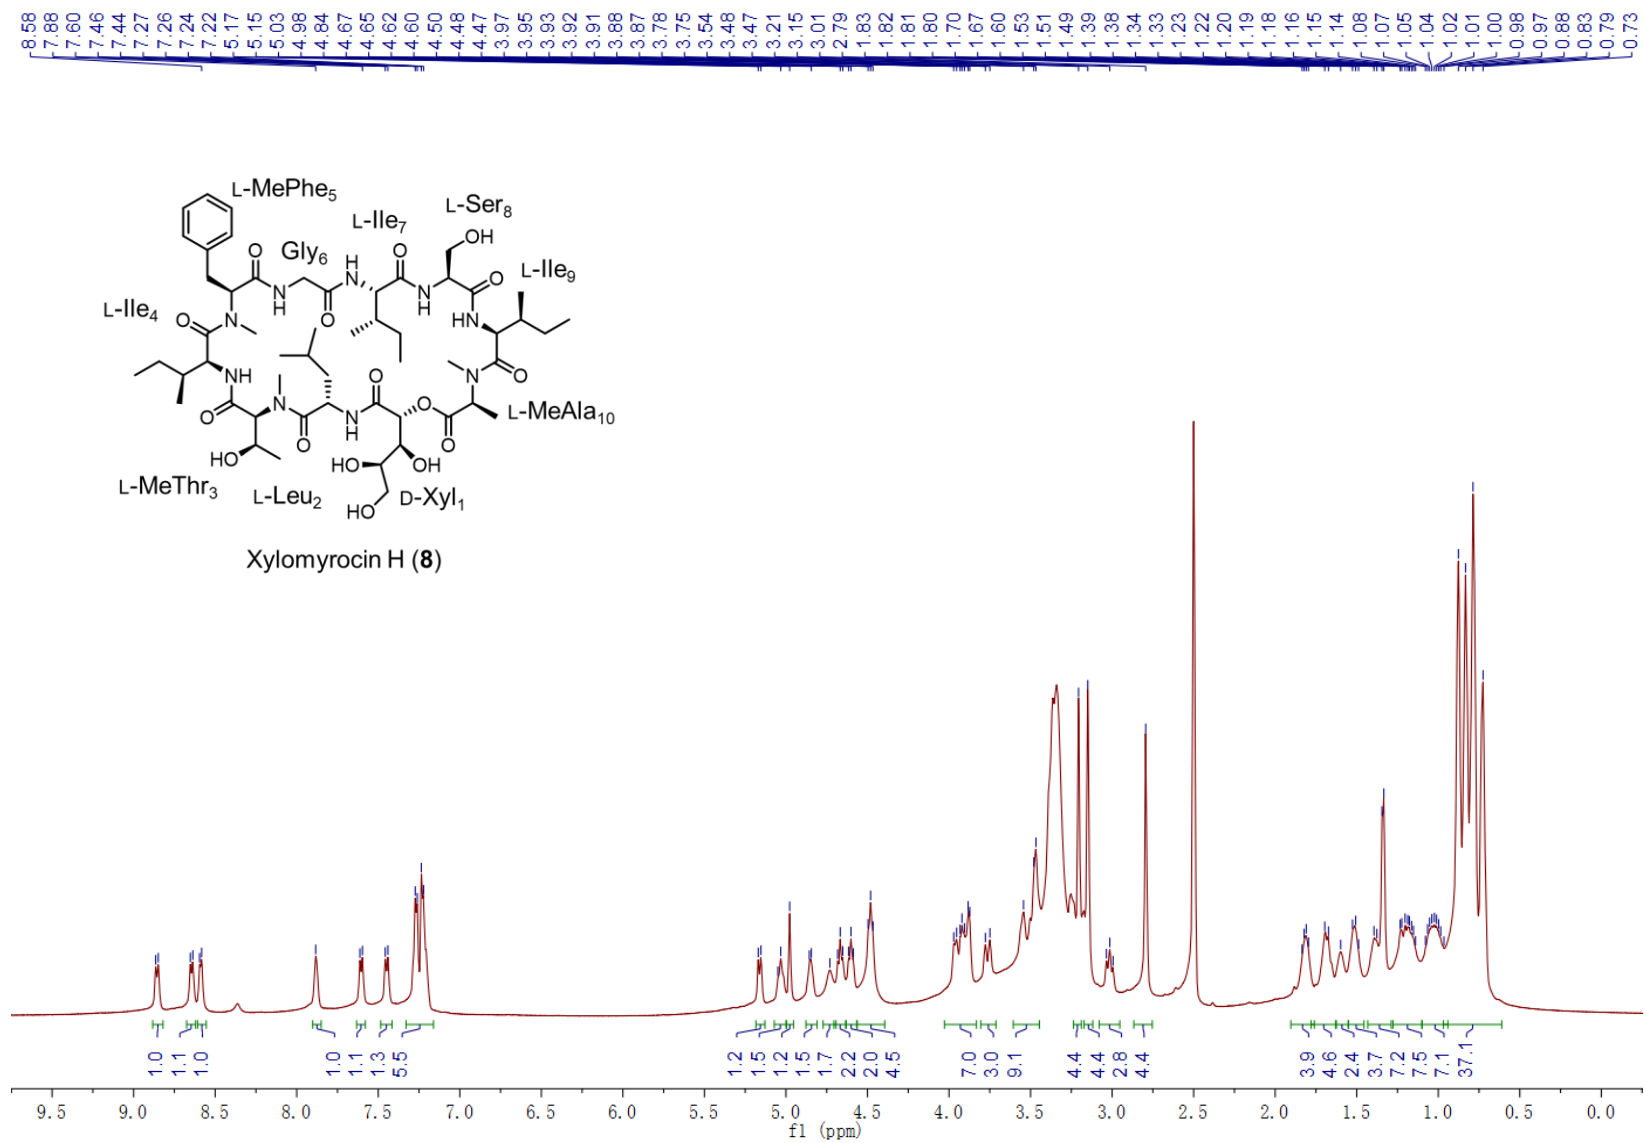

Figure S18.45. <sup>1</sup>H NMR spectrum of 8 in DMSO-*d*<sub>6</sub>

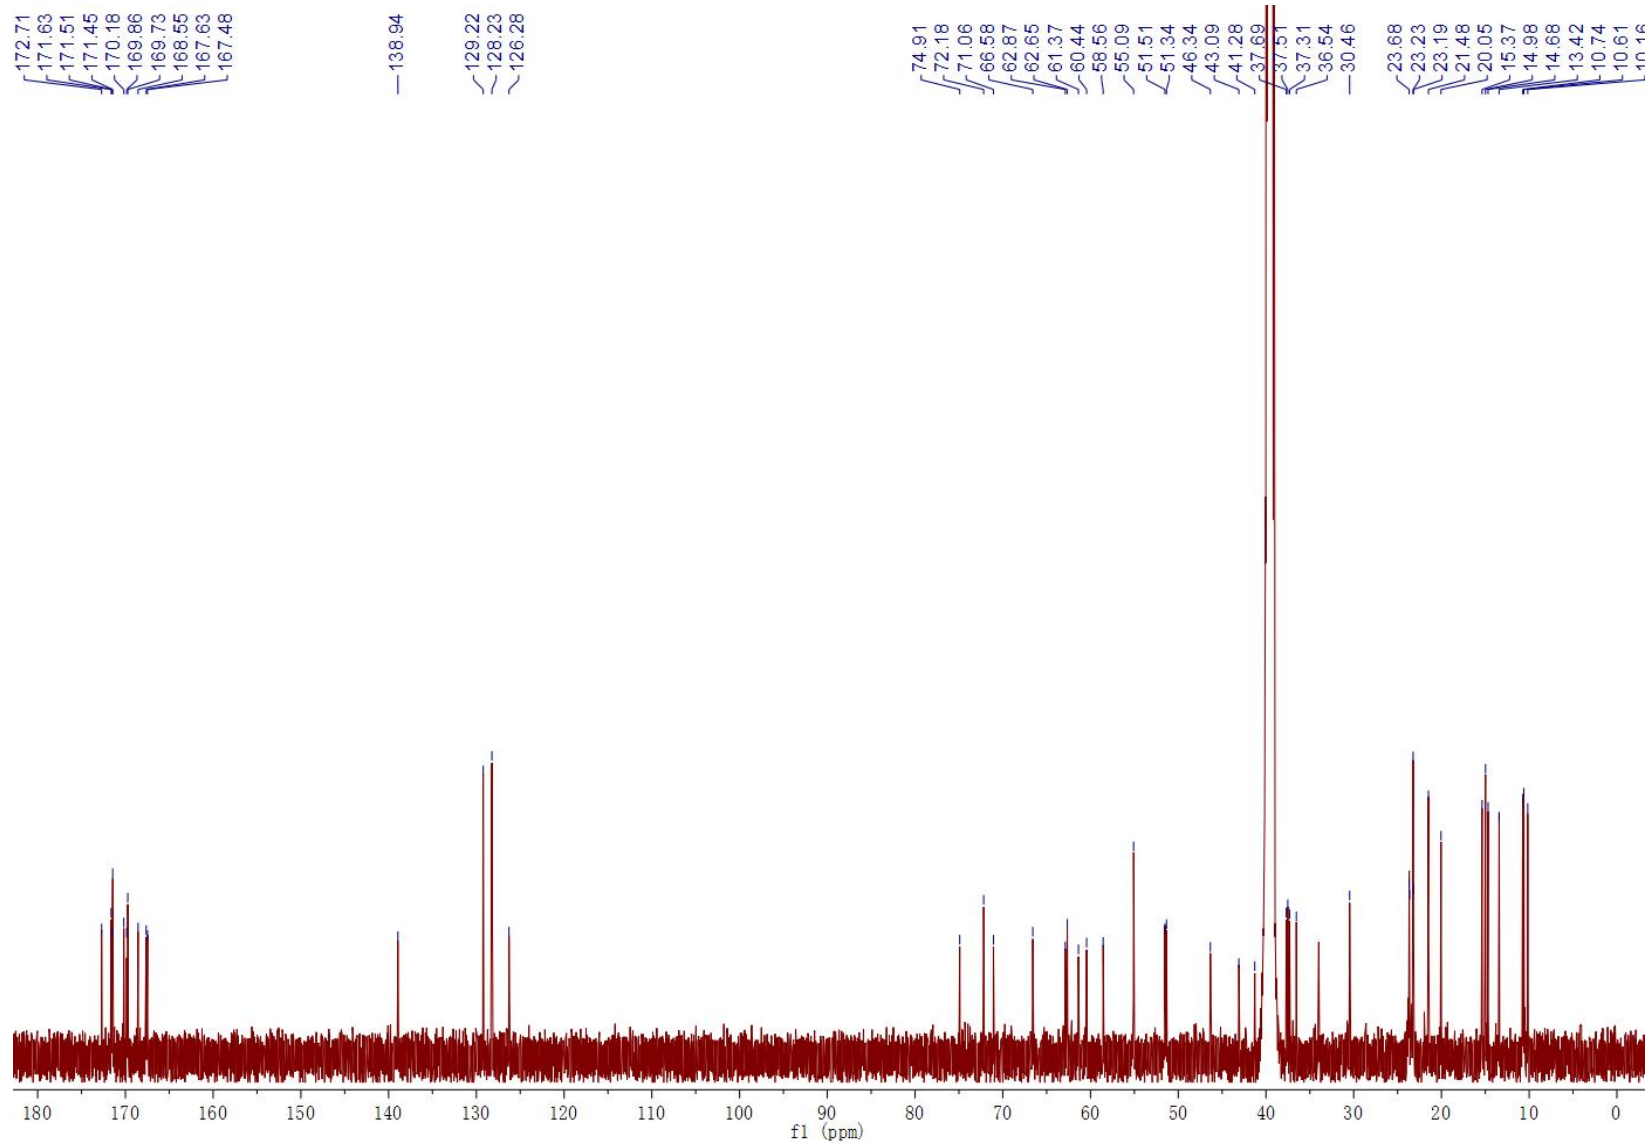

Figure S18.46.  $^{13}\text{C}$  NMR spectrum of 8 in  $\text{DMSO-}d_6$

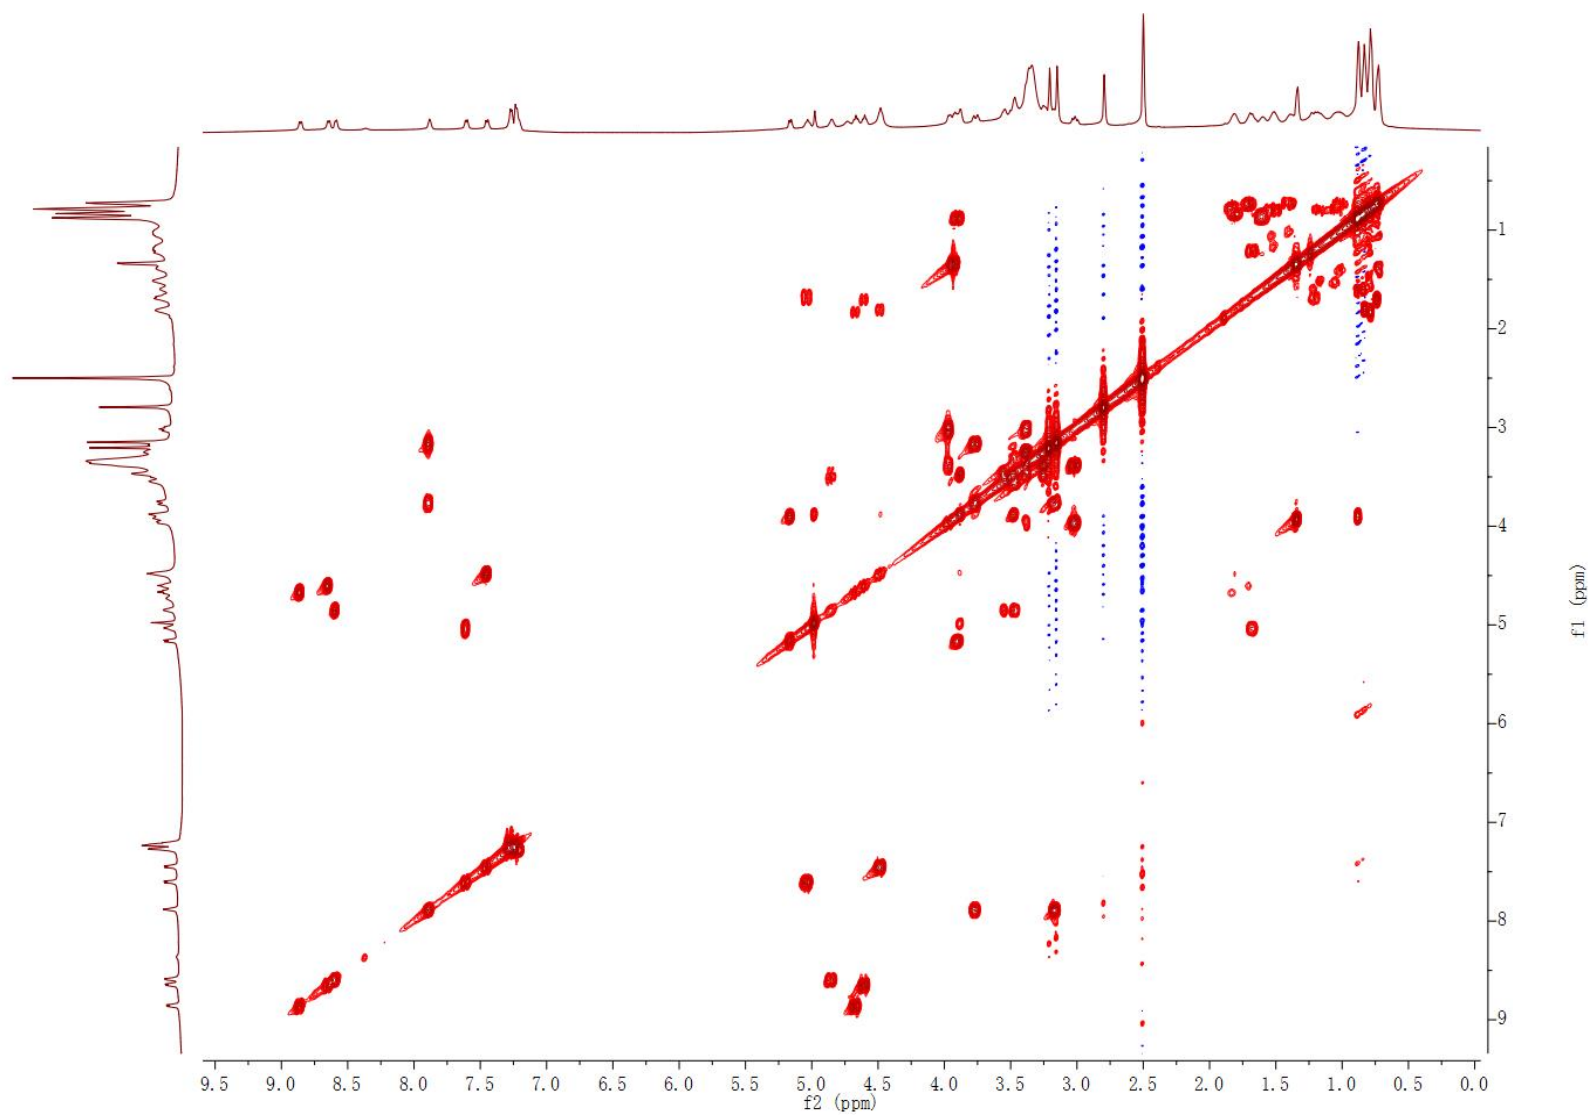

Figure S18.47.  $^1\text{H}$ - $^1\text{H}$  COSY spectrum of 8 in  $\text{DMSO-}d_6$

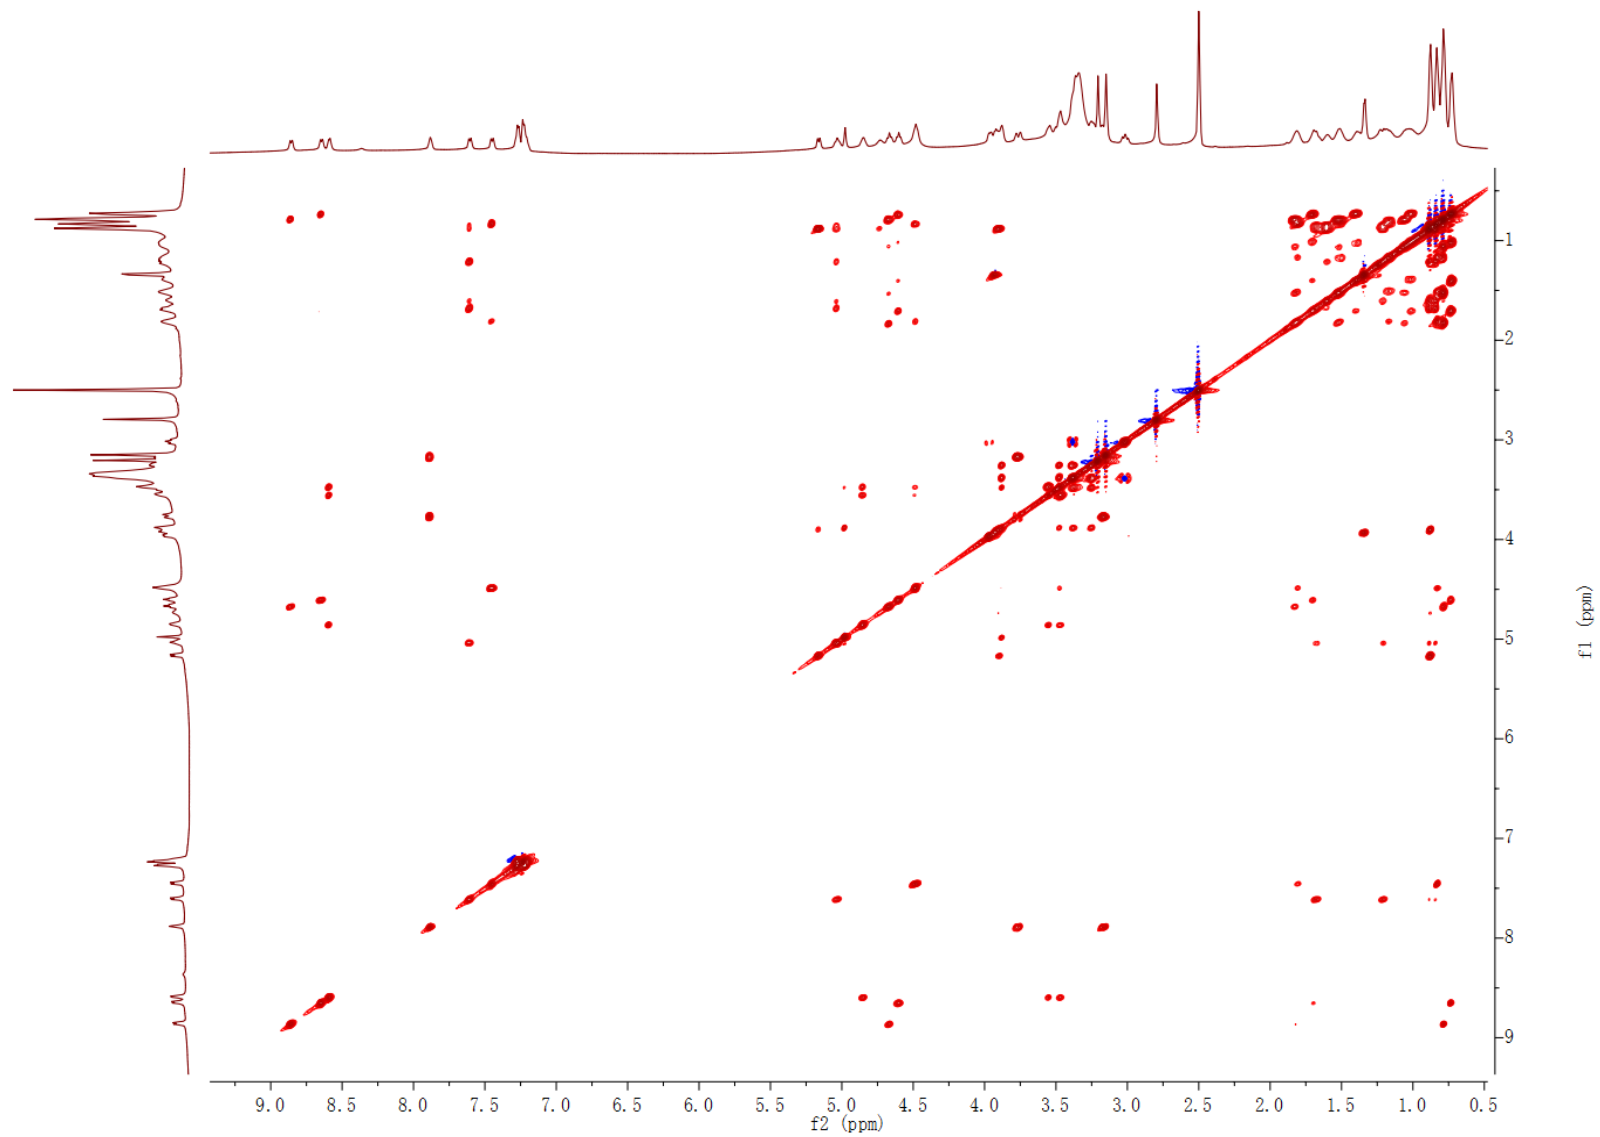

Figure S18.48.  $^1\text{H}$ - $^1\text{H}$  TOCSY spectrum of 8 in  $\text{DMSO-}d_6$

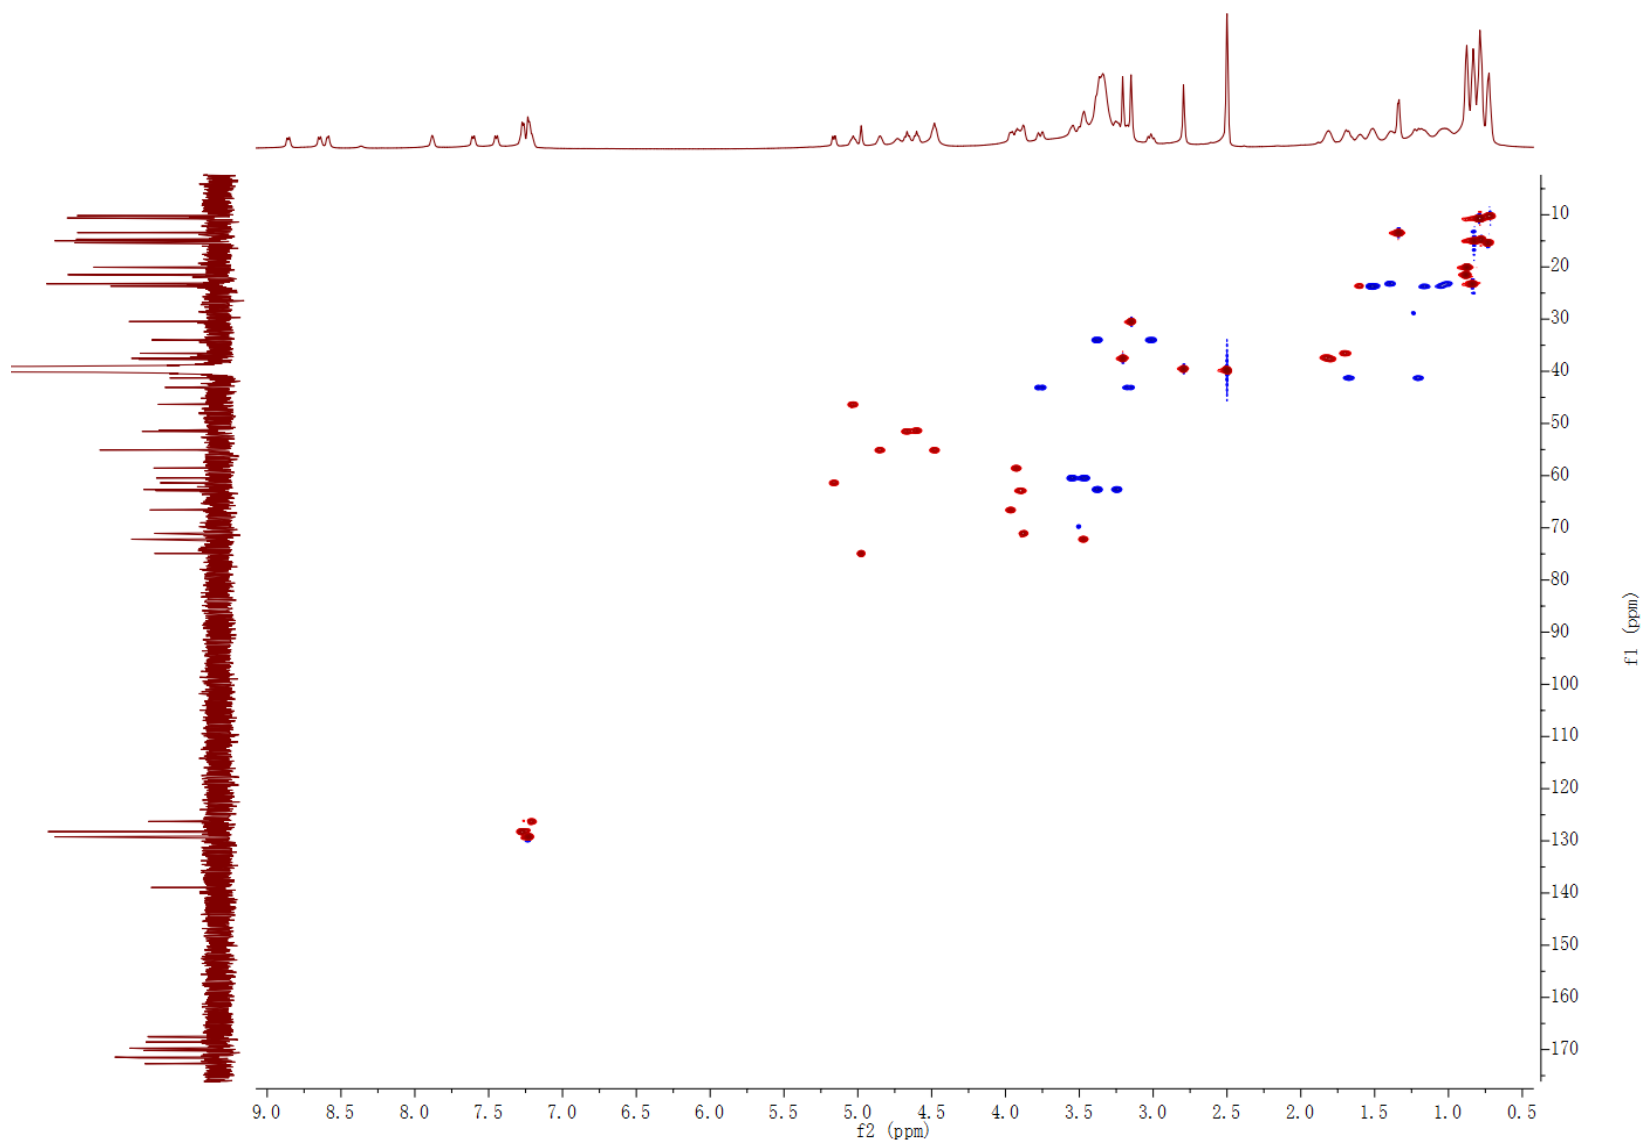

Figure S18.49. HSQC spectrum of 8 in DMSO-*d*<sub>6</sub>

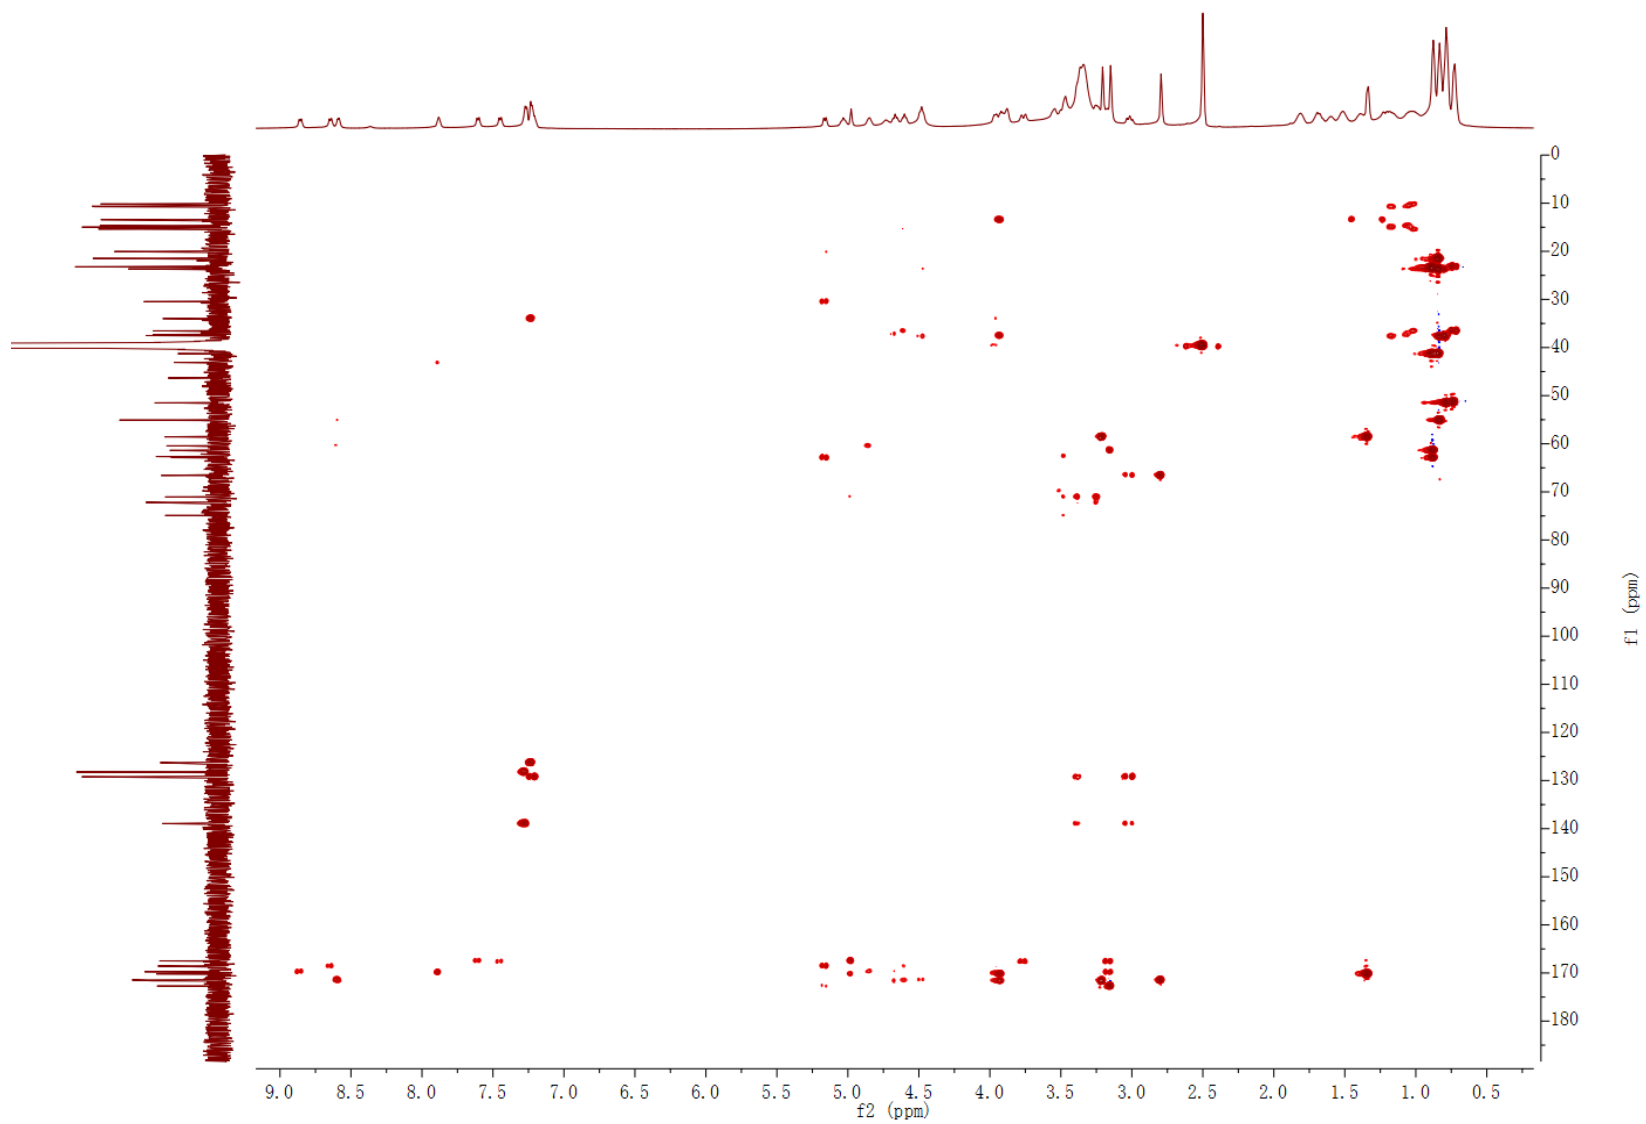

Figure S18.50. HMBC spectrum of 8 in DMSO- $d_6$

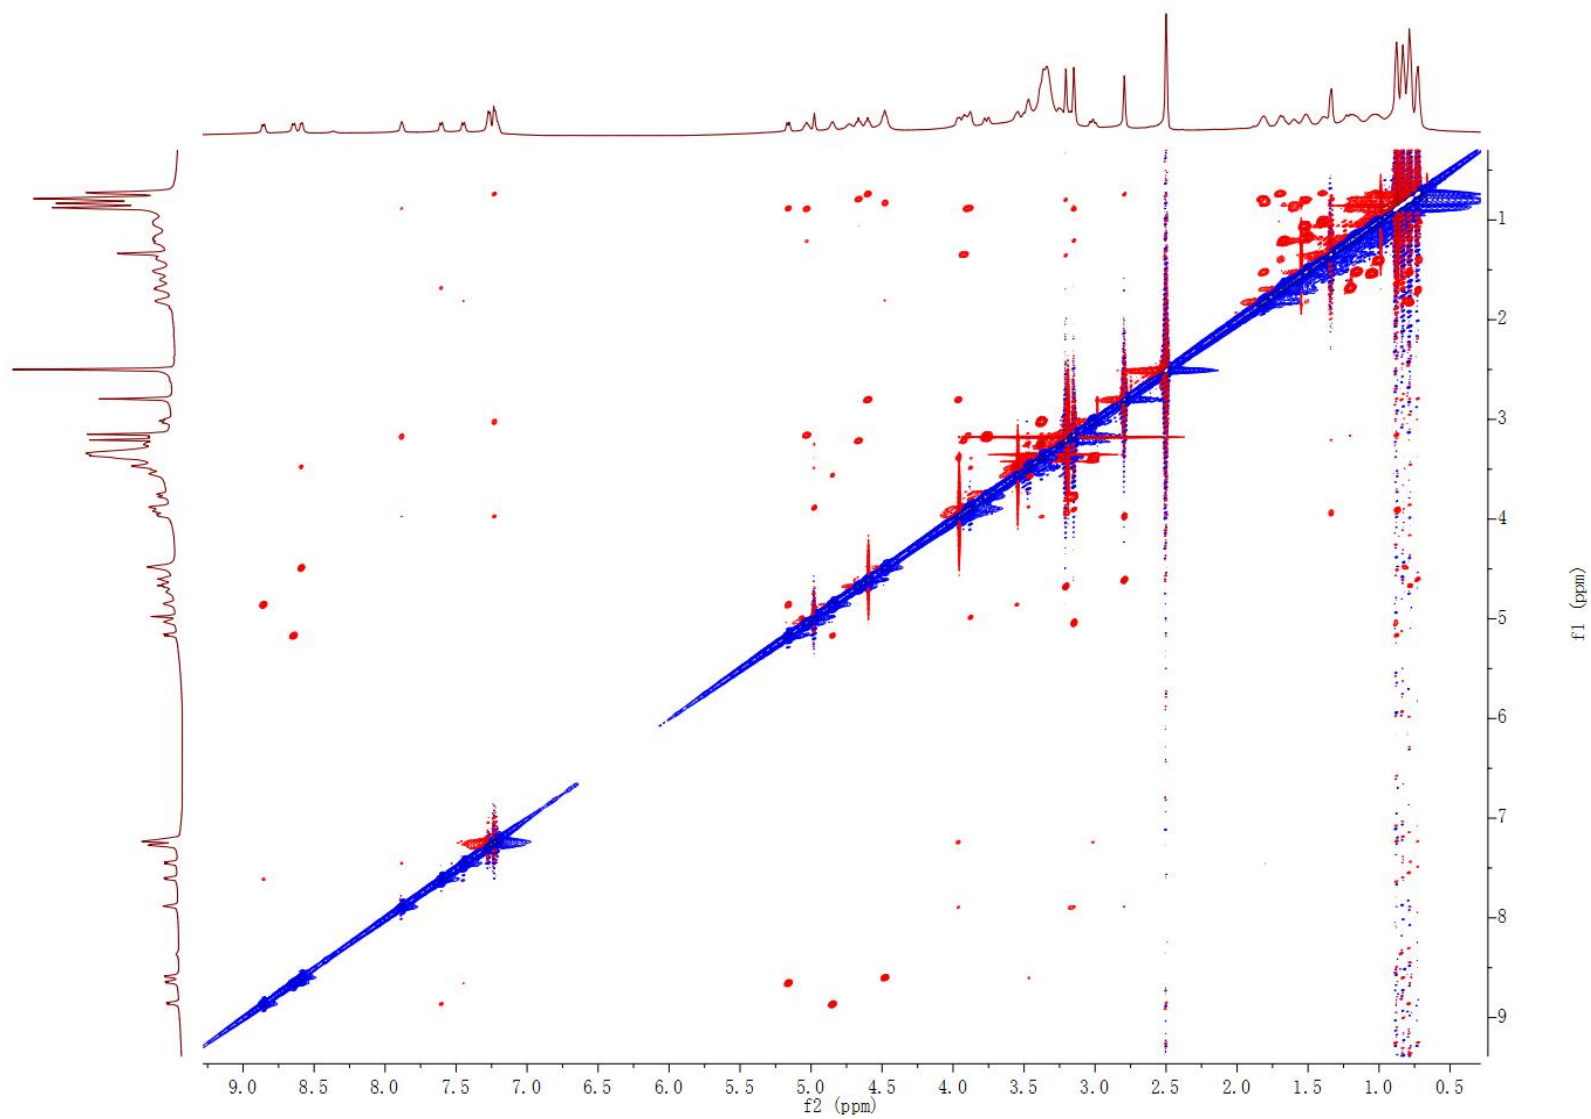

Figure S18.51. ROESY spectrum of 8 in DMSO-*d*<sub>6</sub>



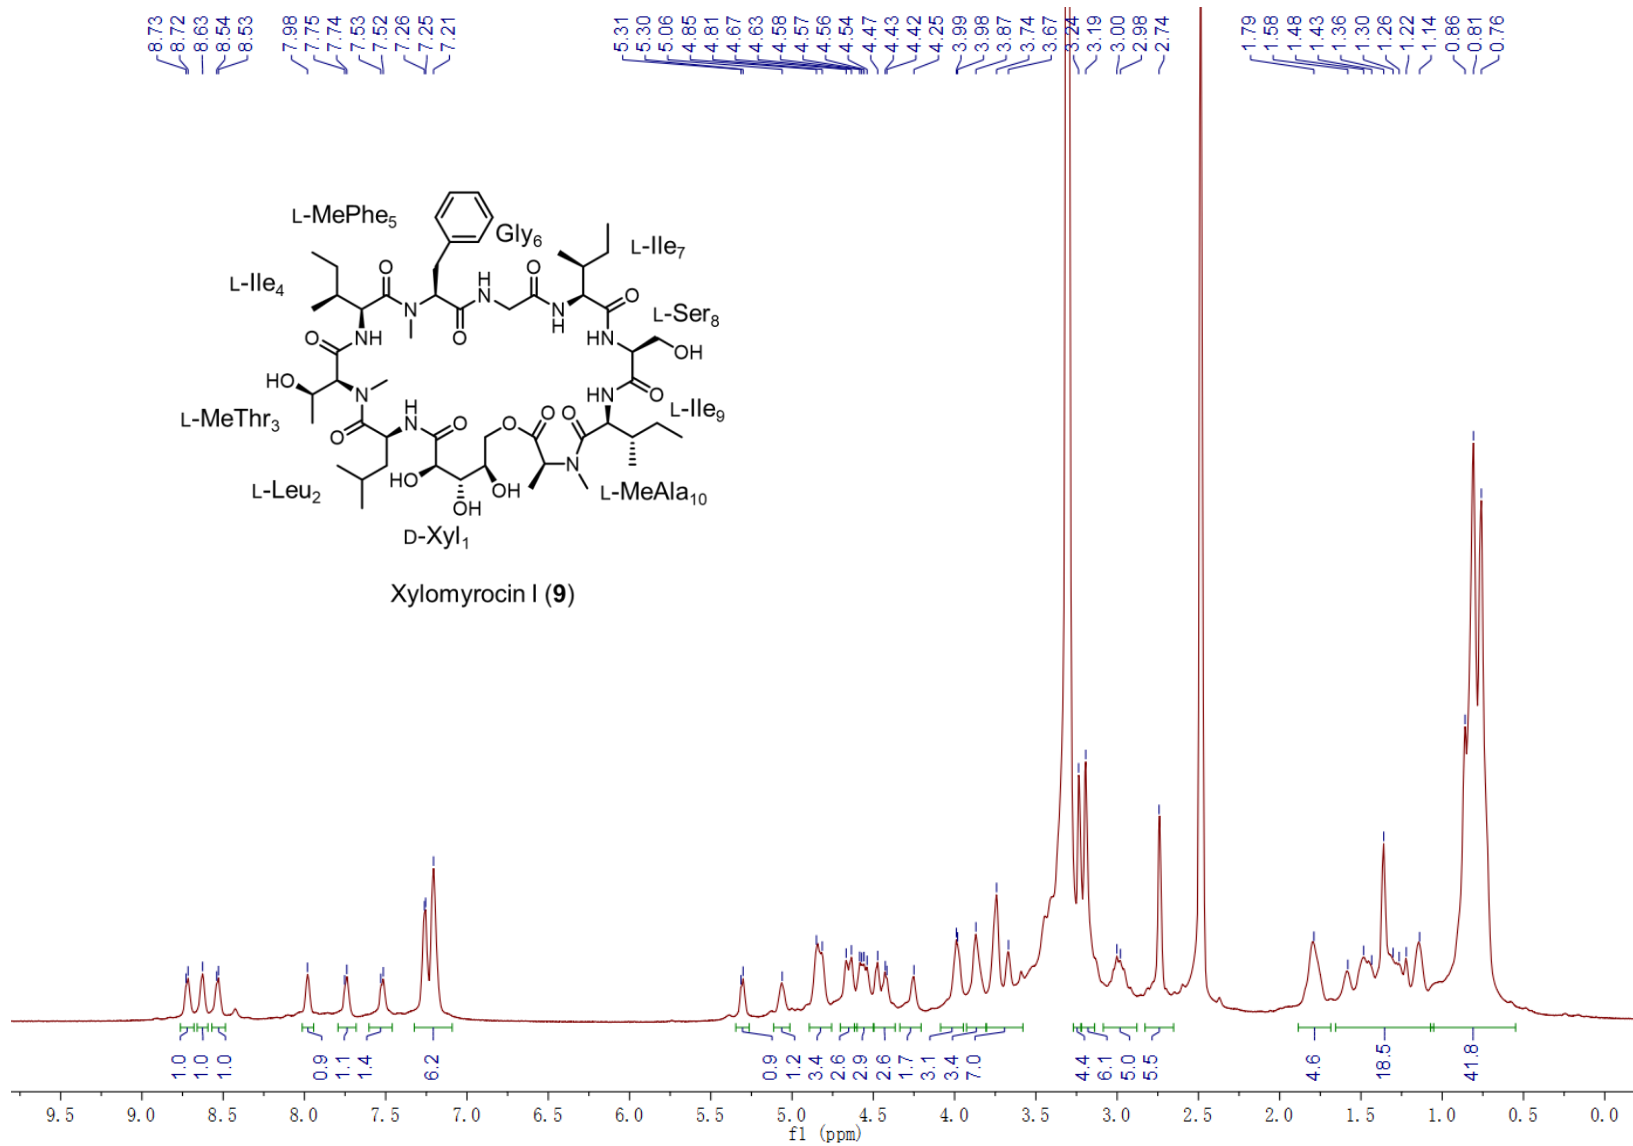

Figure S18.52. <sup>1</sup>H NMR spectrum of 9 in DMSO-*d*<sub>6</sub>

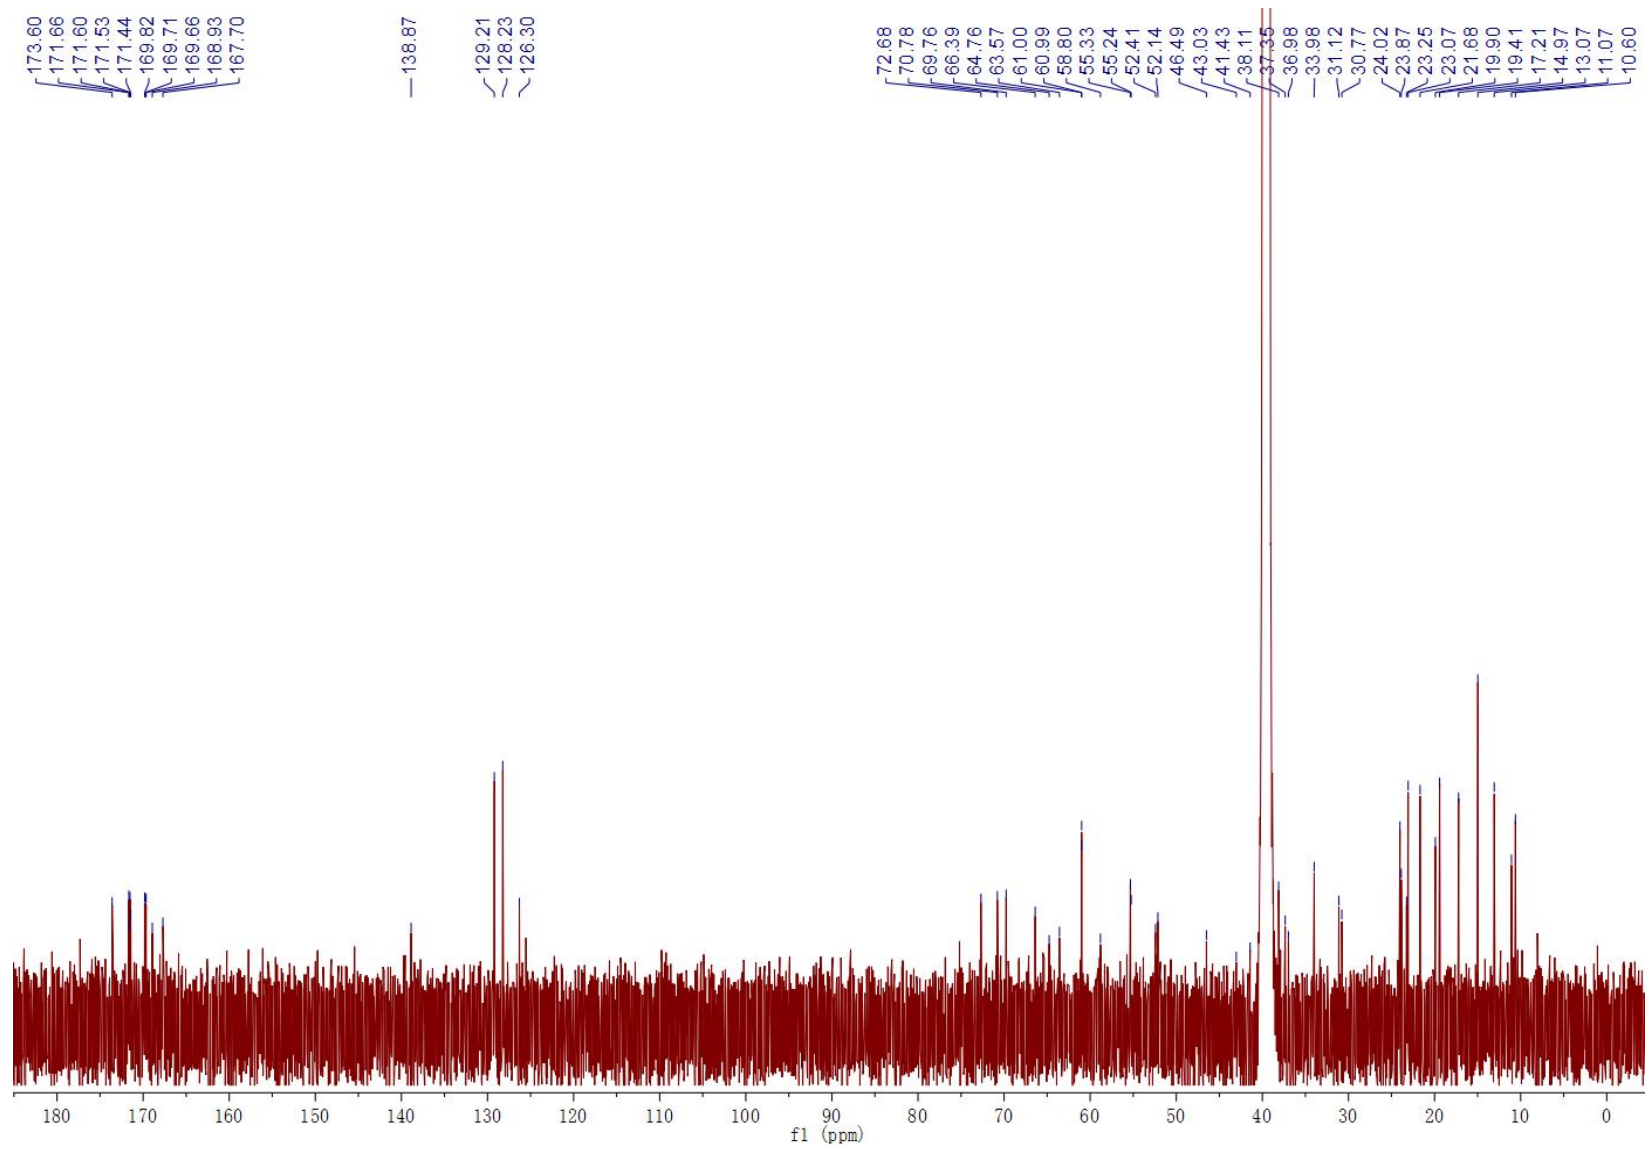

Figure S18.53. <sup>13</sup>C NMR spectrum of 9 in DMSO-*d*<sub>6</sub>

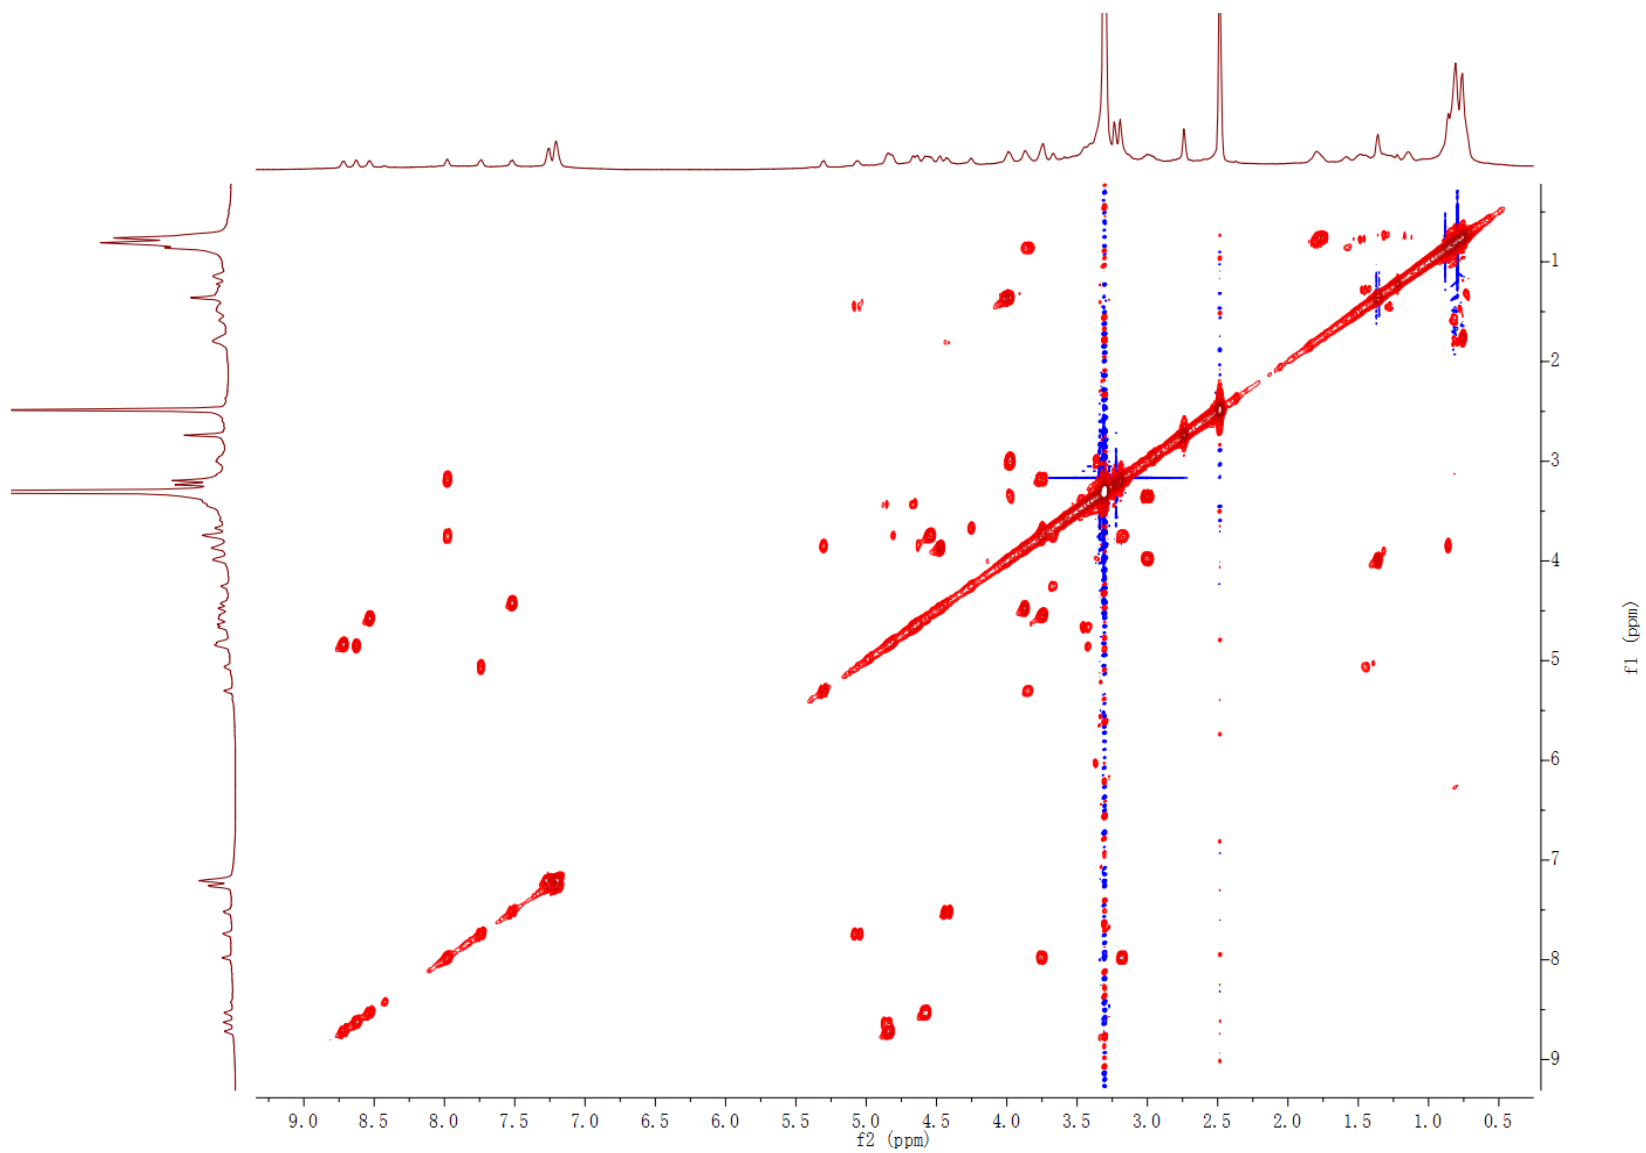

Figure S18.54.  $^1\text{H}$ - $^1\text{H}$  COSY spectrum of 9 in  $\text{DMSO-}d_6$

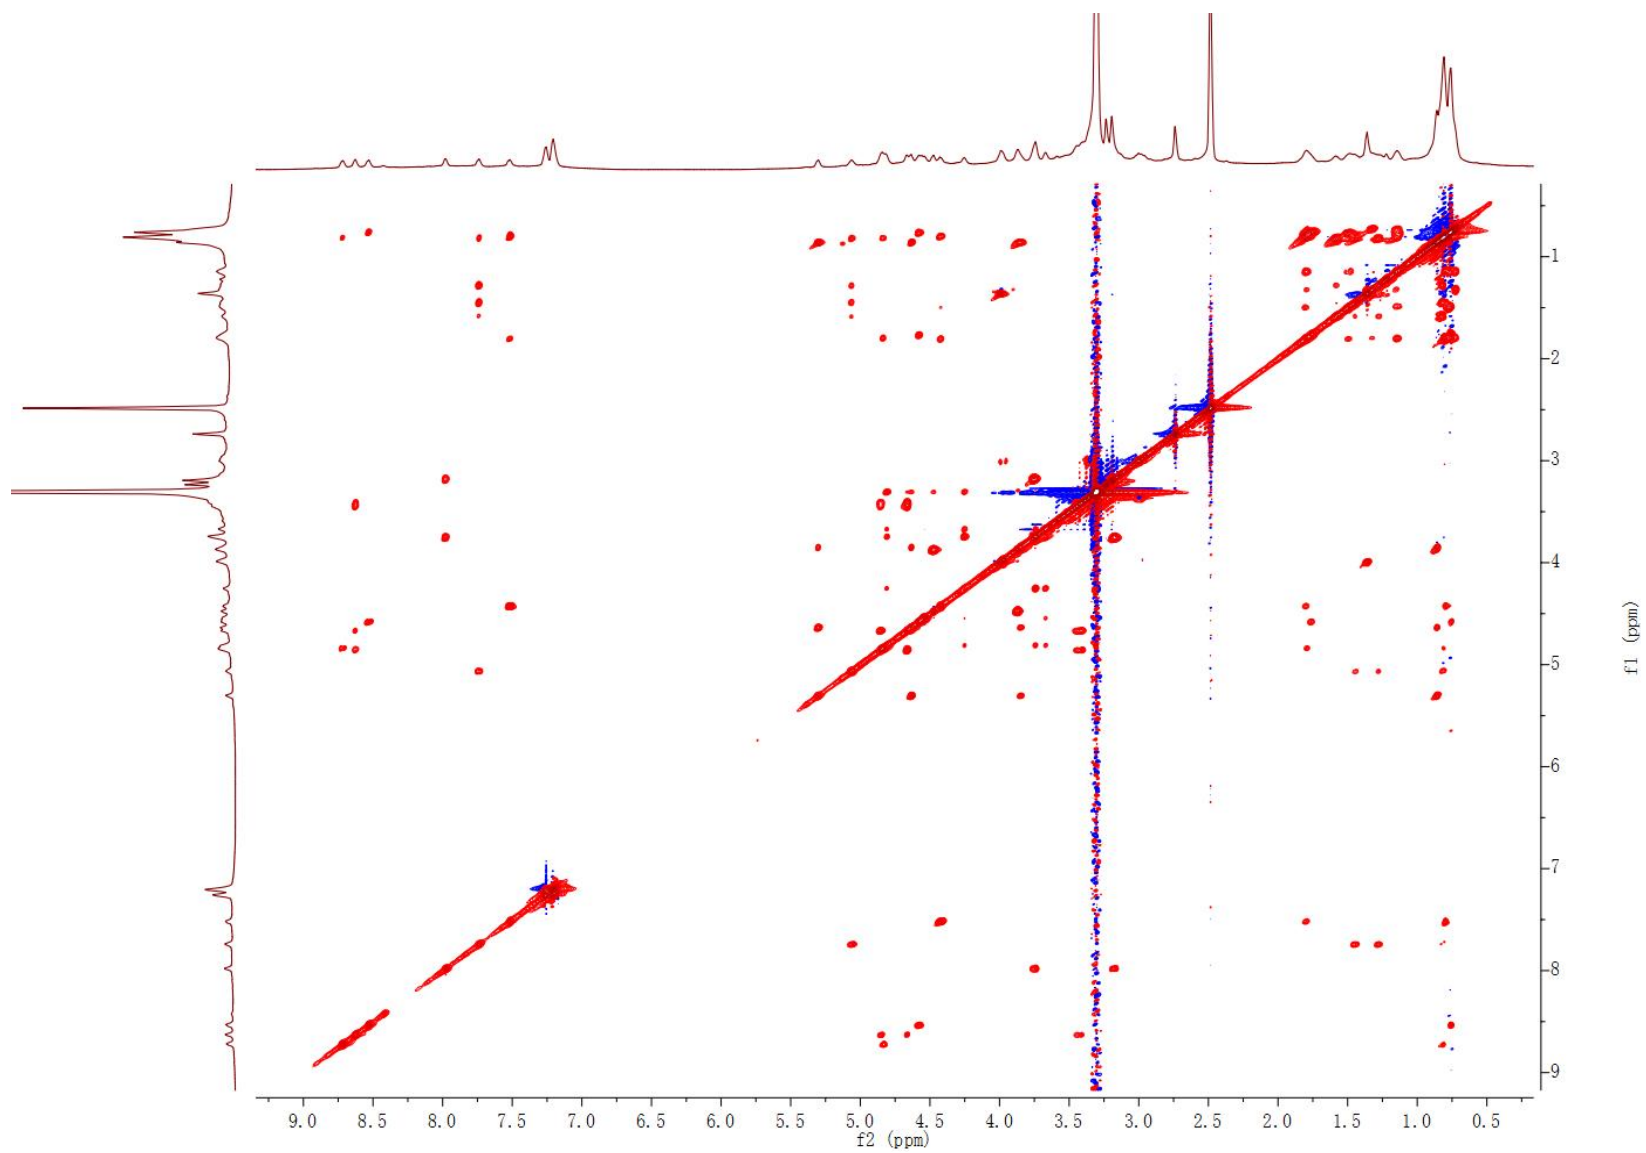

Figure S18.55.  $^1\text{H}$ - $^1\text{H}$  TOCSY spectrum of 9 in  $\text{DMSO-}d_6$

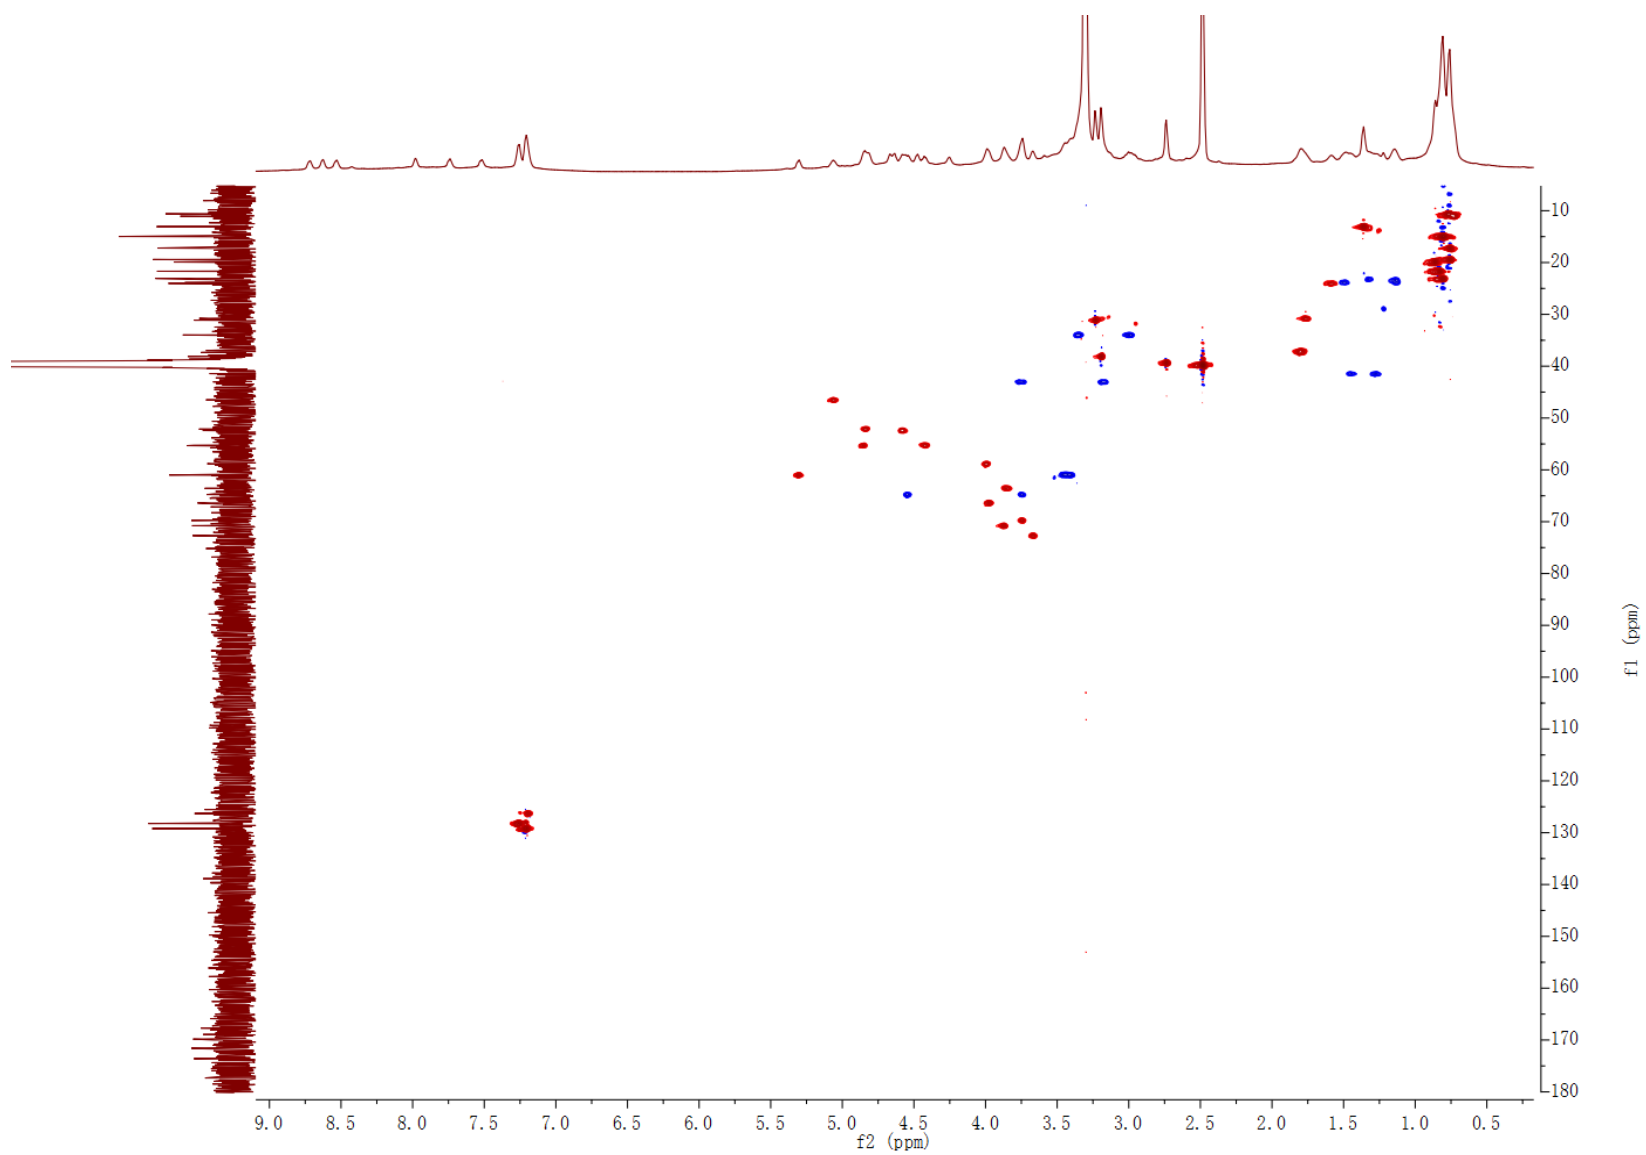

Figure S18.56. HSQC spectrum of 9 in DMSO-*d*<sub>6</sub>

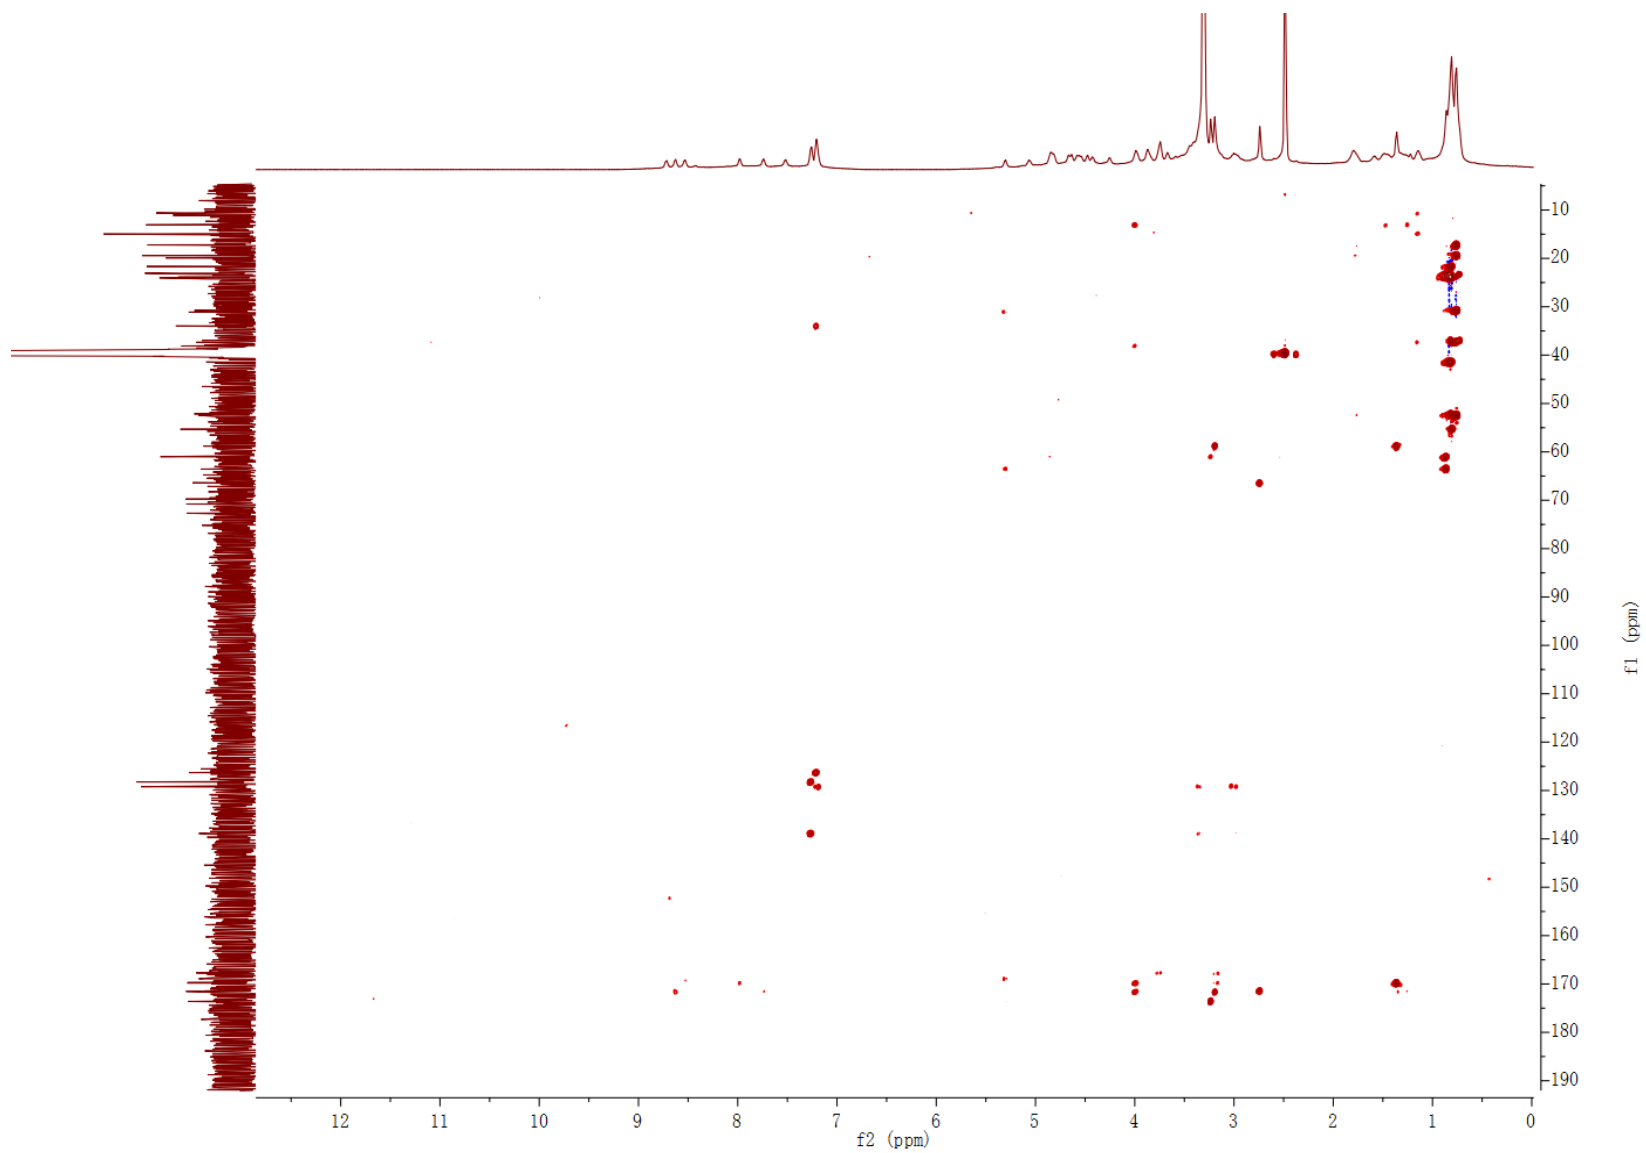

Figure S18.57. HMBC spectrum of 9 in DMSO-*d*<sub>6</sub>

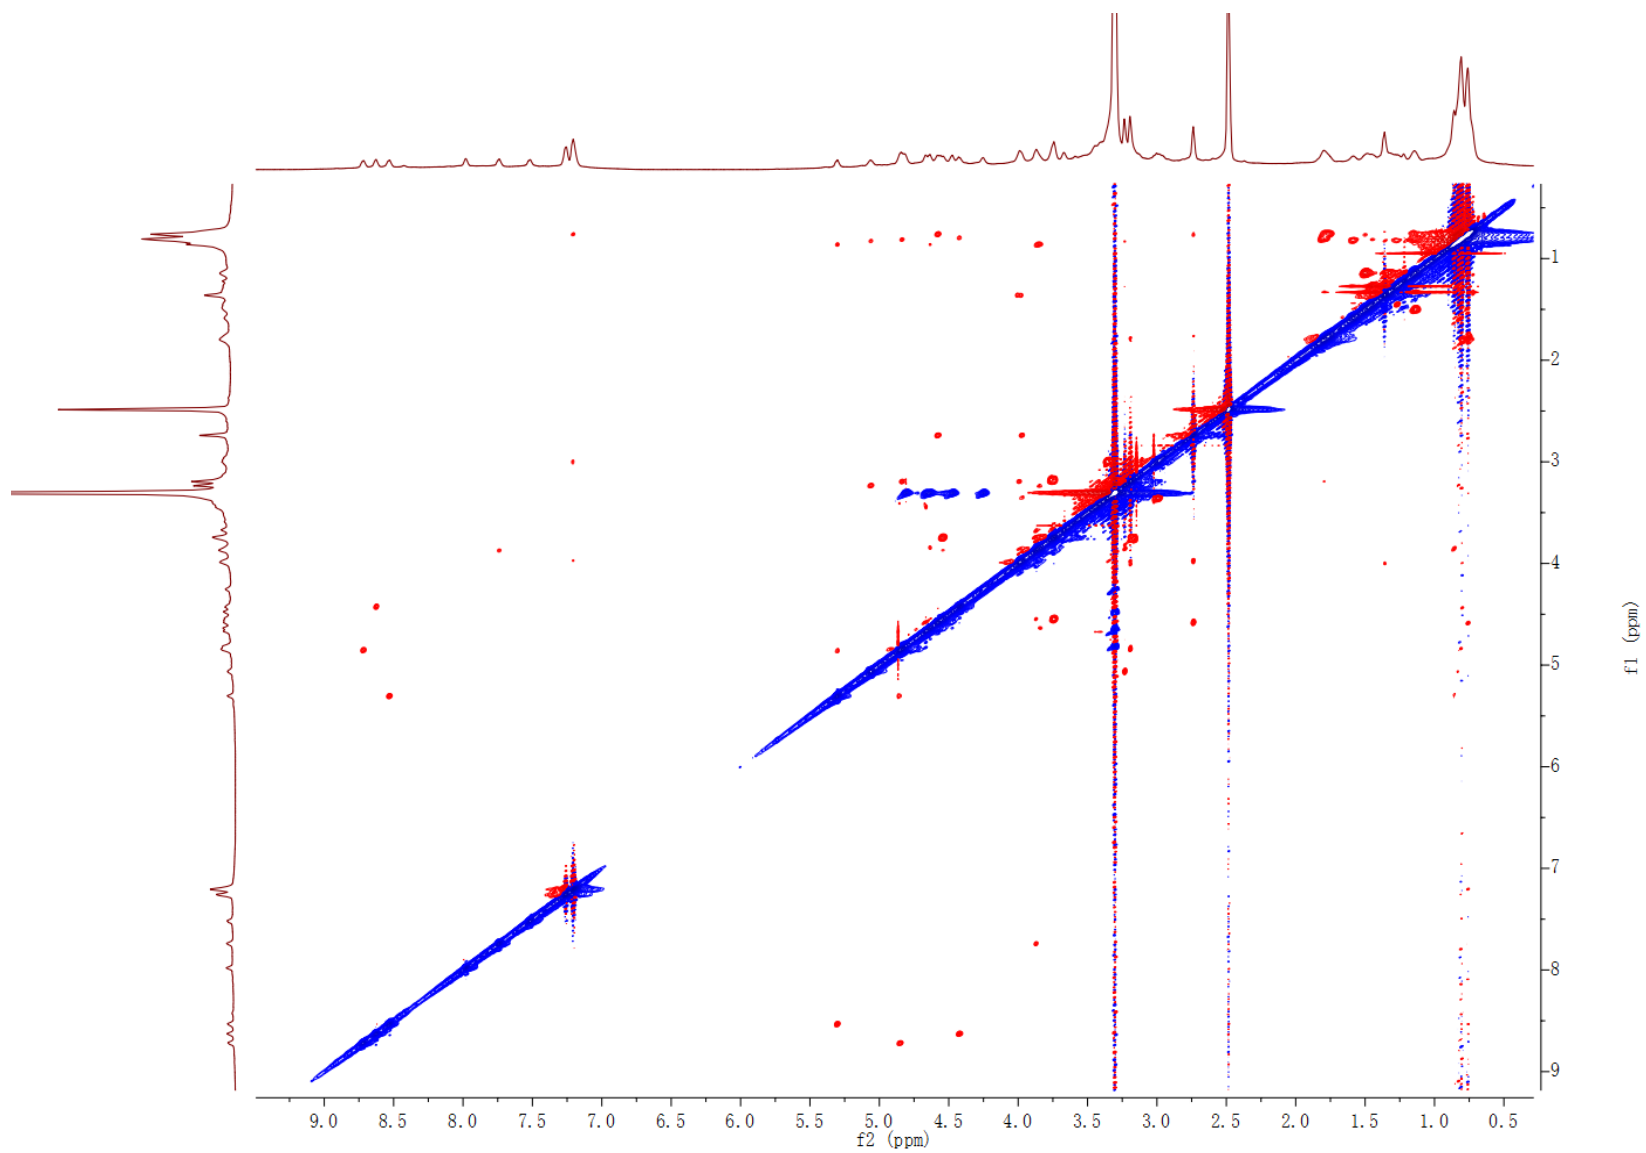

Figure S18.58. ROESY spectrum of 9 in DMSO-*d*<sub>6</sub>

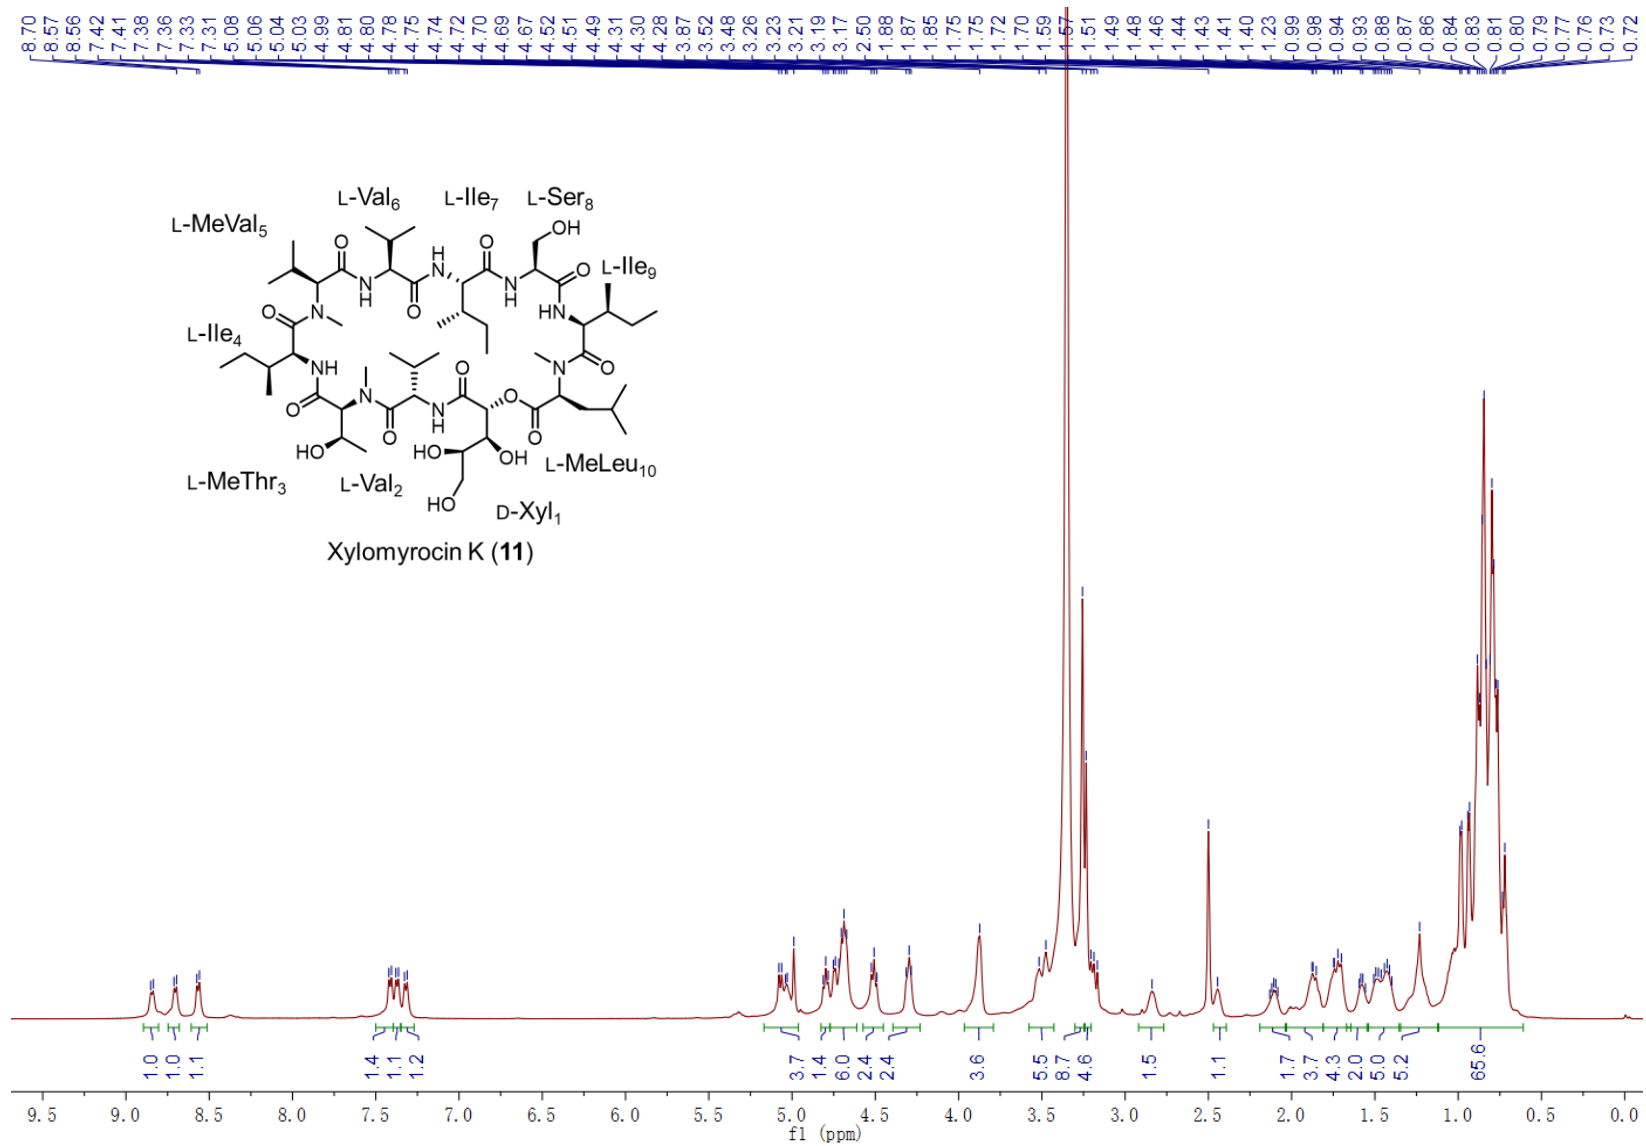

Figure S18.59. <sup>1</sup>H NMR spectrum of 11 in DMSO-*d*<sub>6</sub>



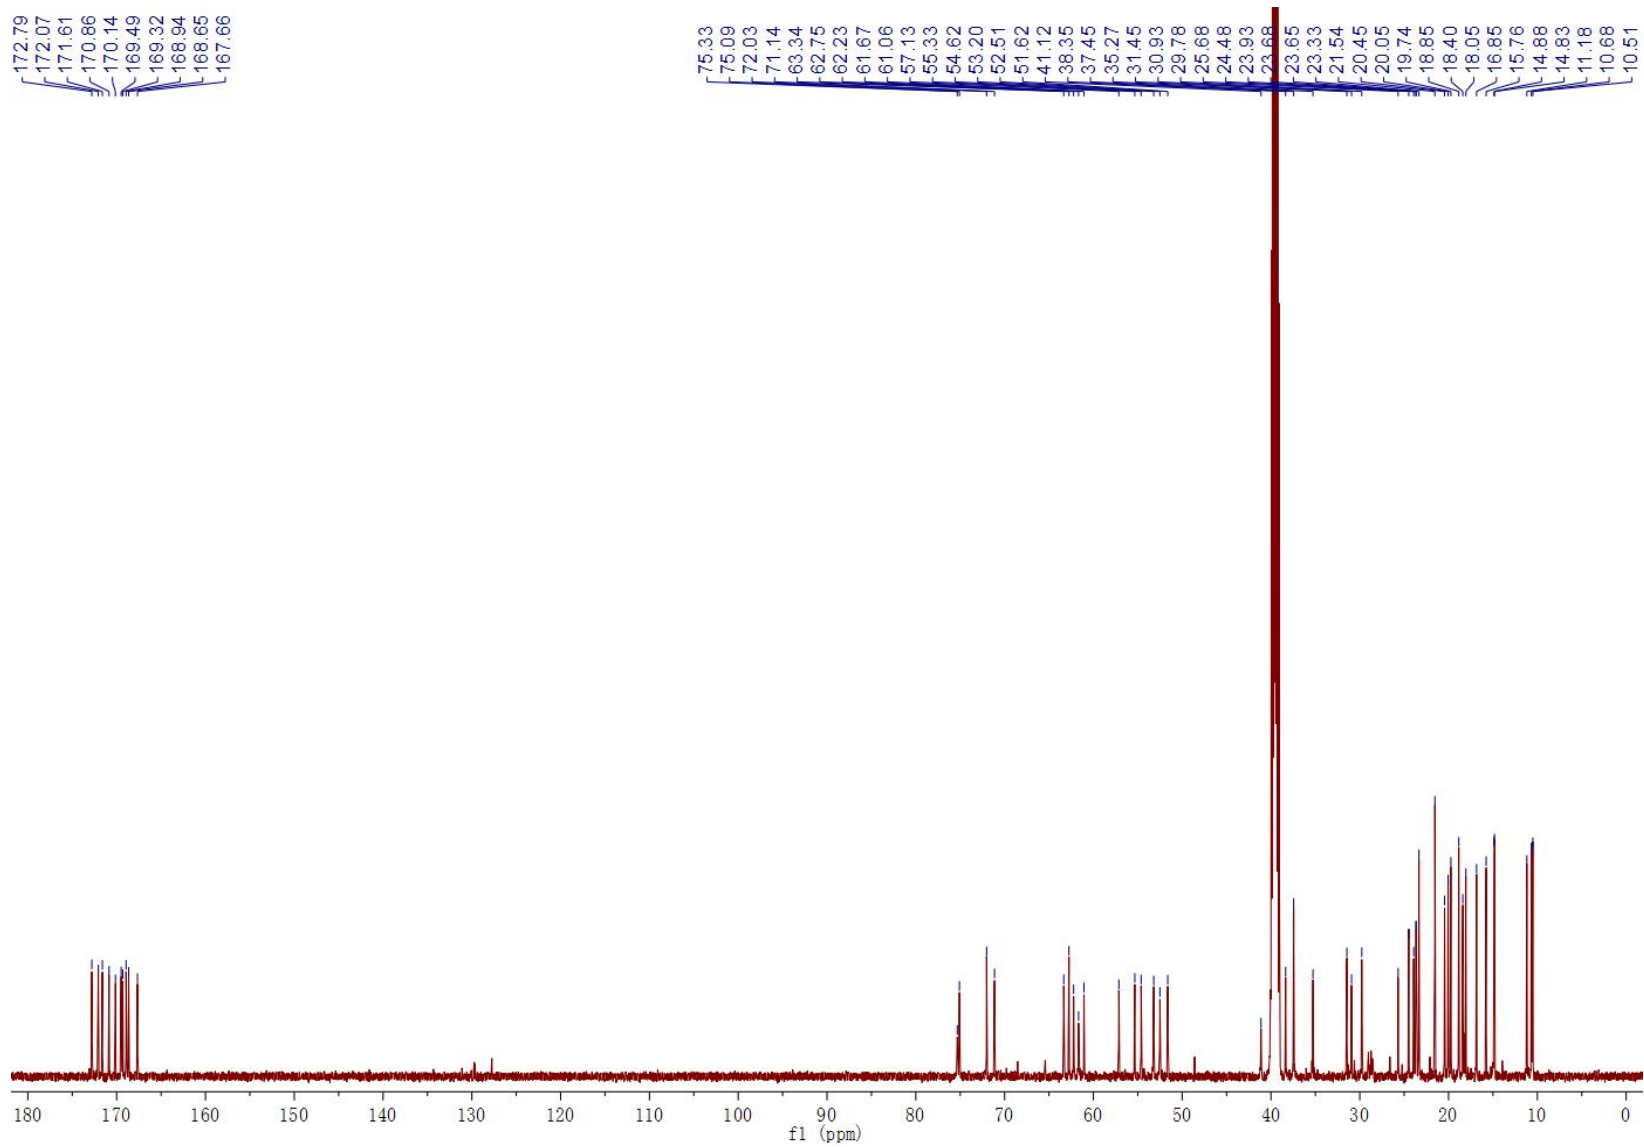

Figure S18.60.  $^{13}\text{C}$  NMR spectrum of 11 in  $\text{DMSO-}d_6$

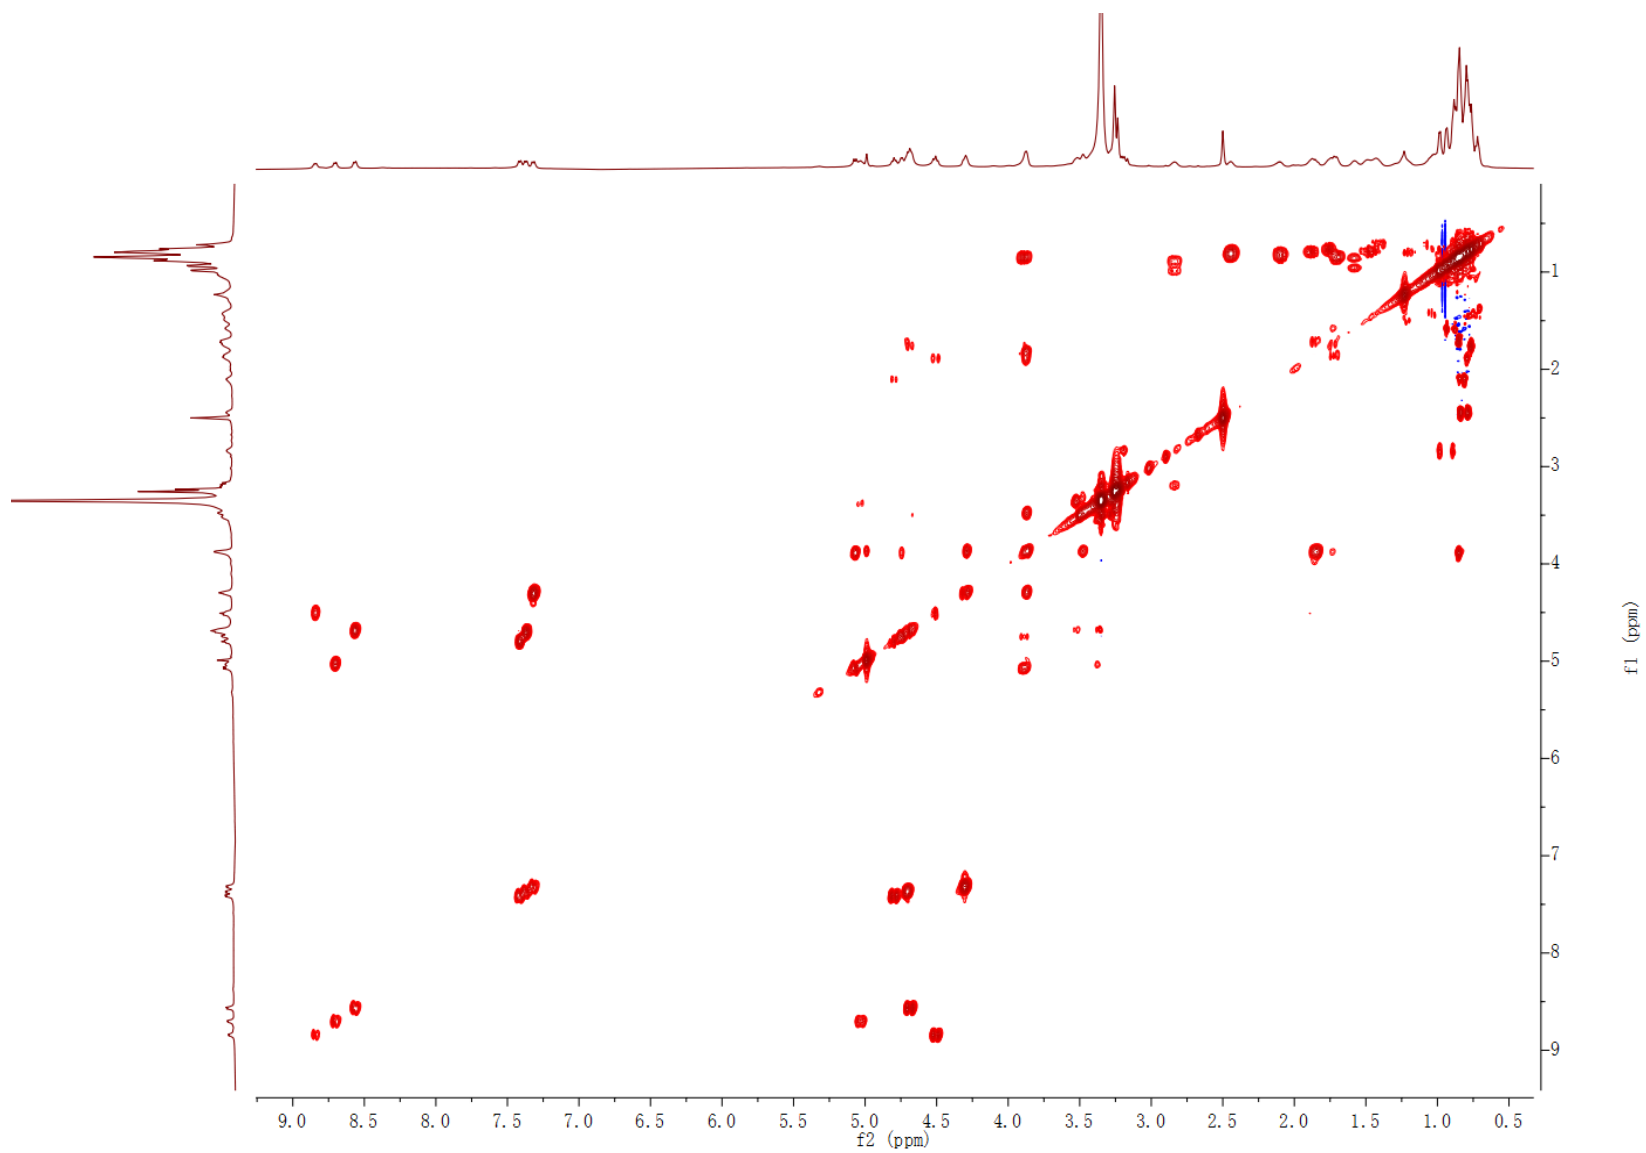

Figure S18.61.  $^1\text{H}$ - $^1\text{H}$  COSY spectrum of 11 in  $\text{DMSO}-d_6$

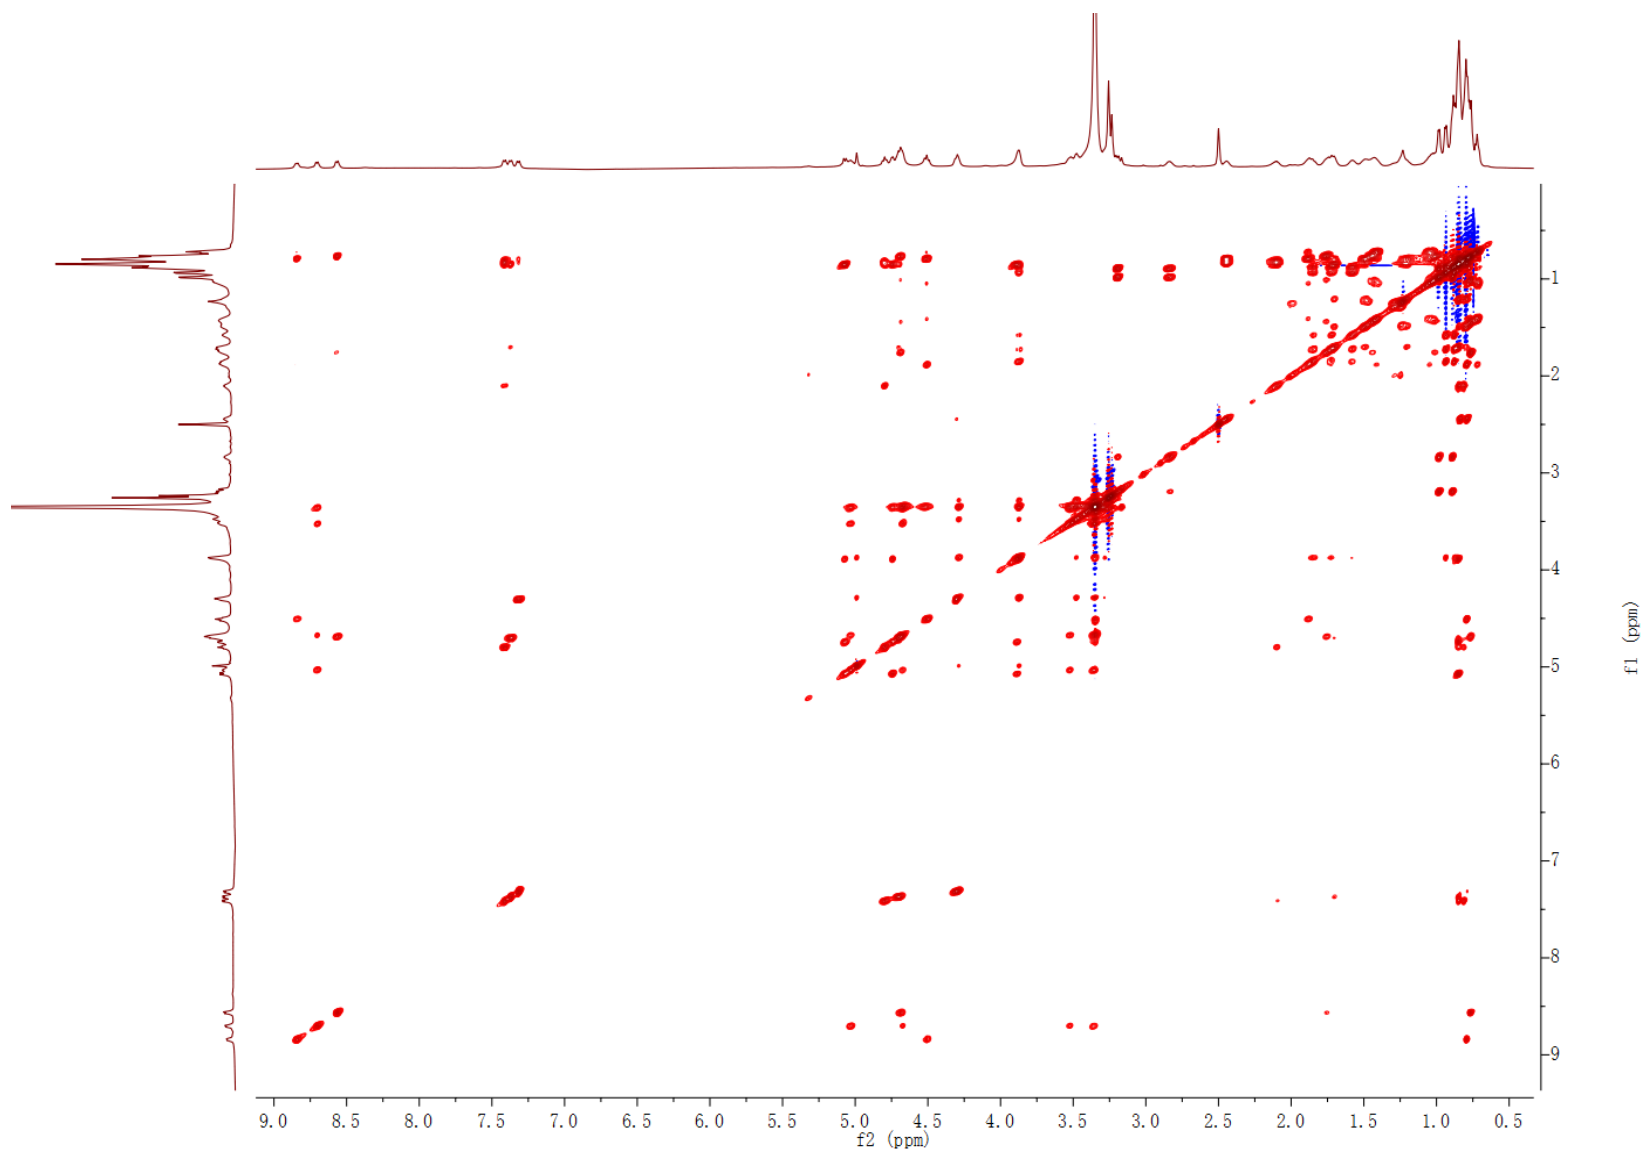

Figure S18.62.  $^1\text{H}$ - $^1\text{H}$  TOCSY spectrum of 11 in  $\text{DMSO}-d_6$

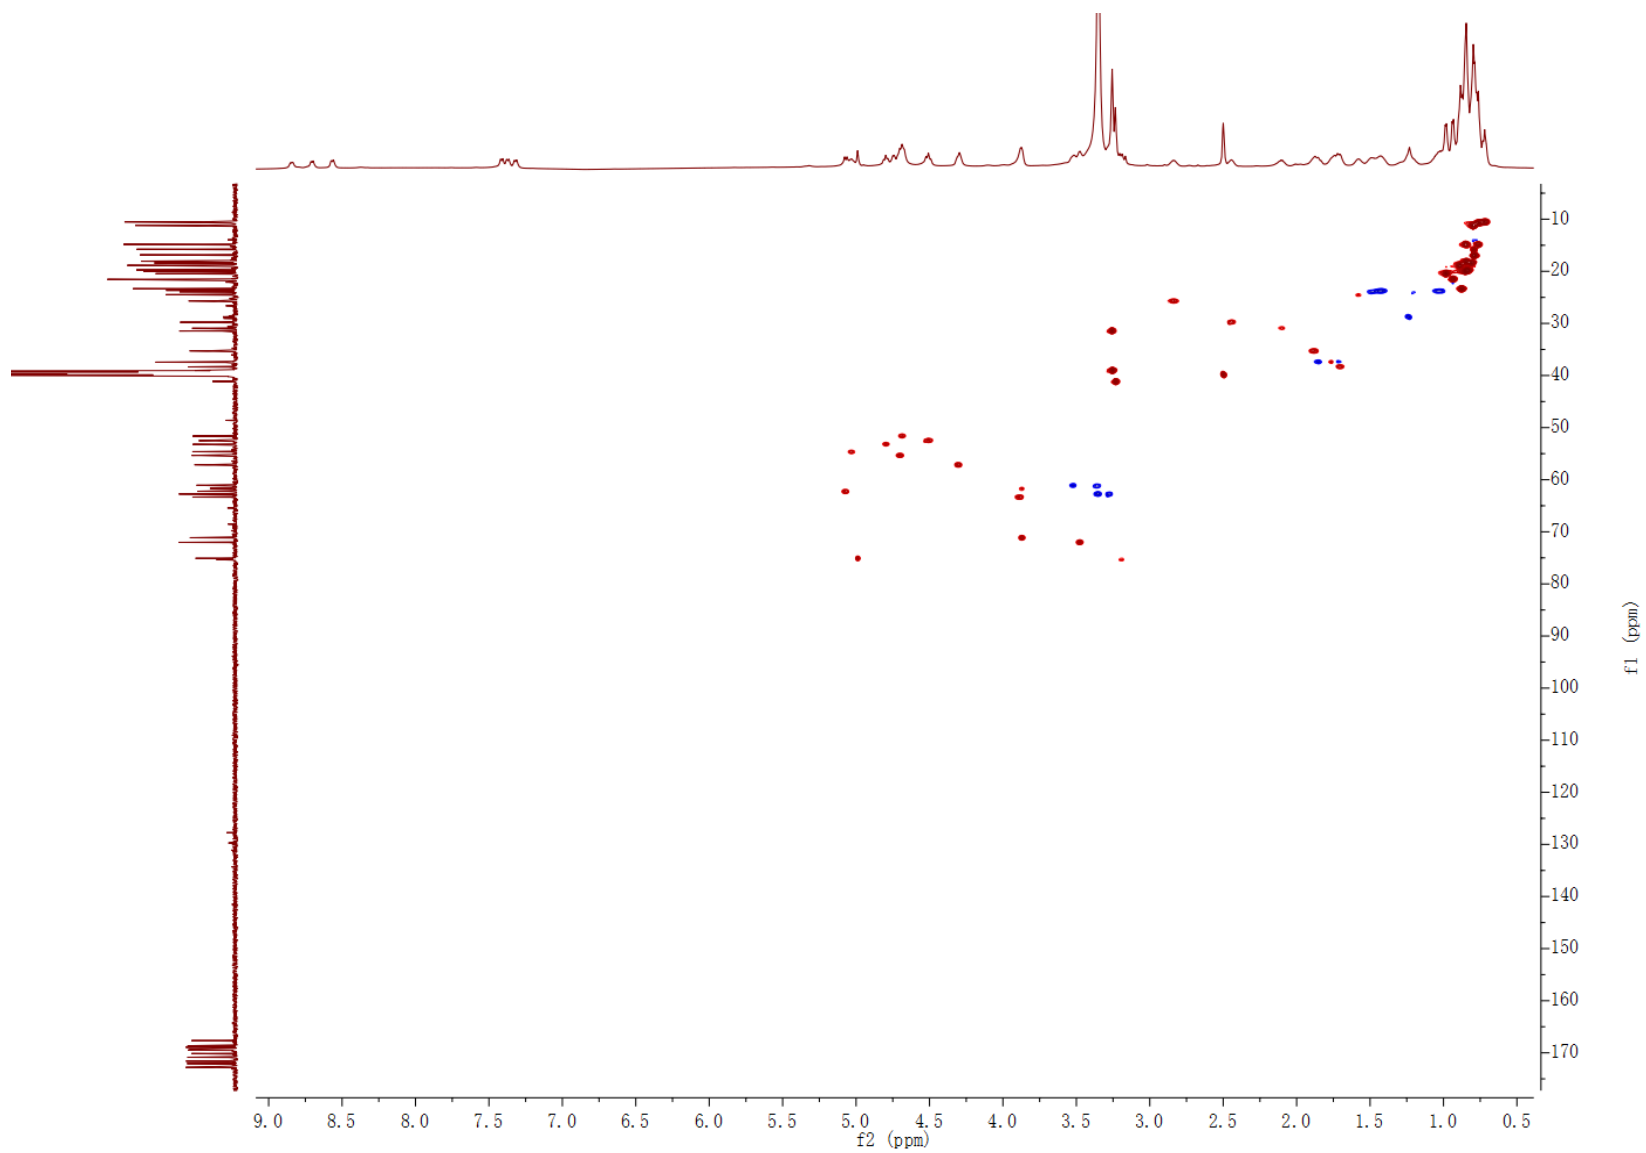

Figure S18.63. HSQC spectrum of 11 in DMSO-*d*<sub>6</sub>

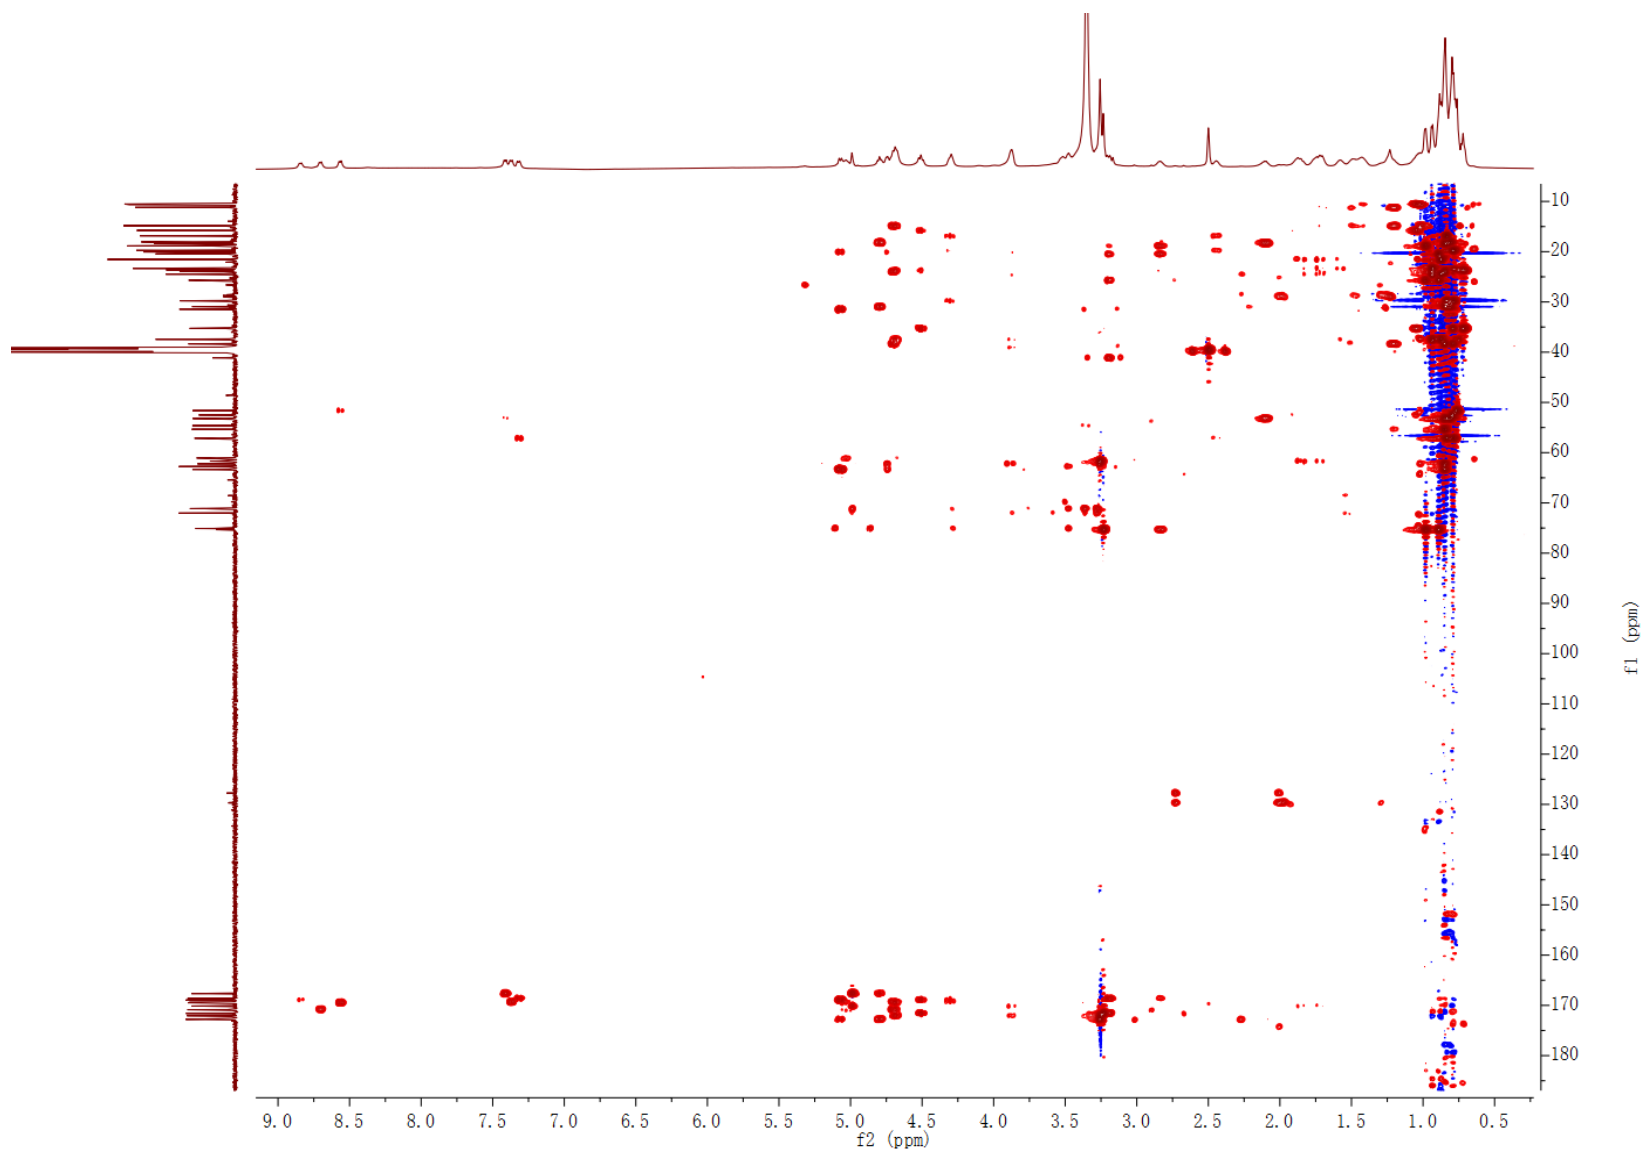

Figure S18.64. HMBC spectrum of 11 in DMSO- $d_6$

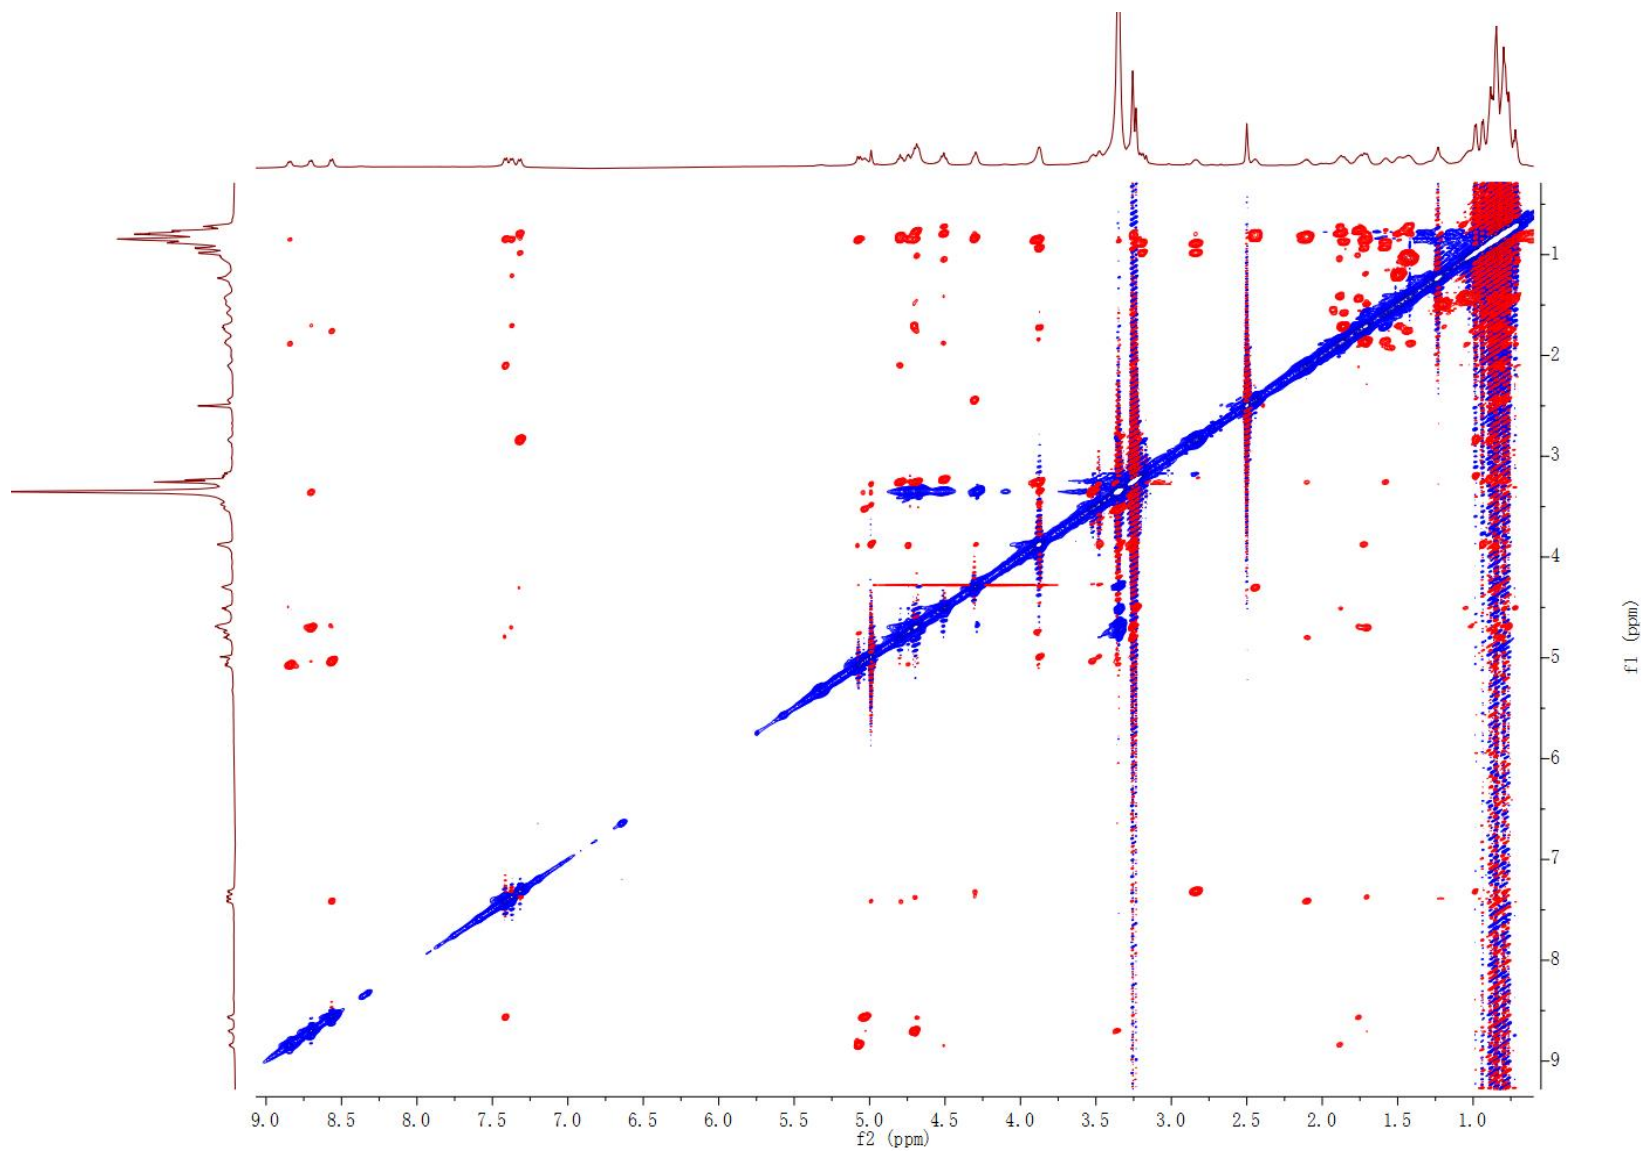

Figure S18.65. ROESY spectrum of 11 in DMSO-*d*<sub>6</sub>

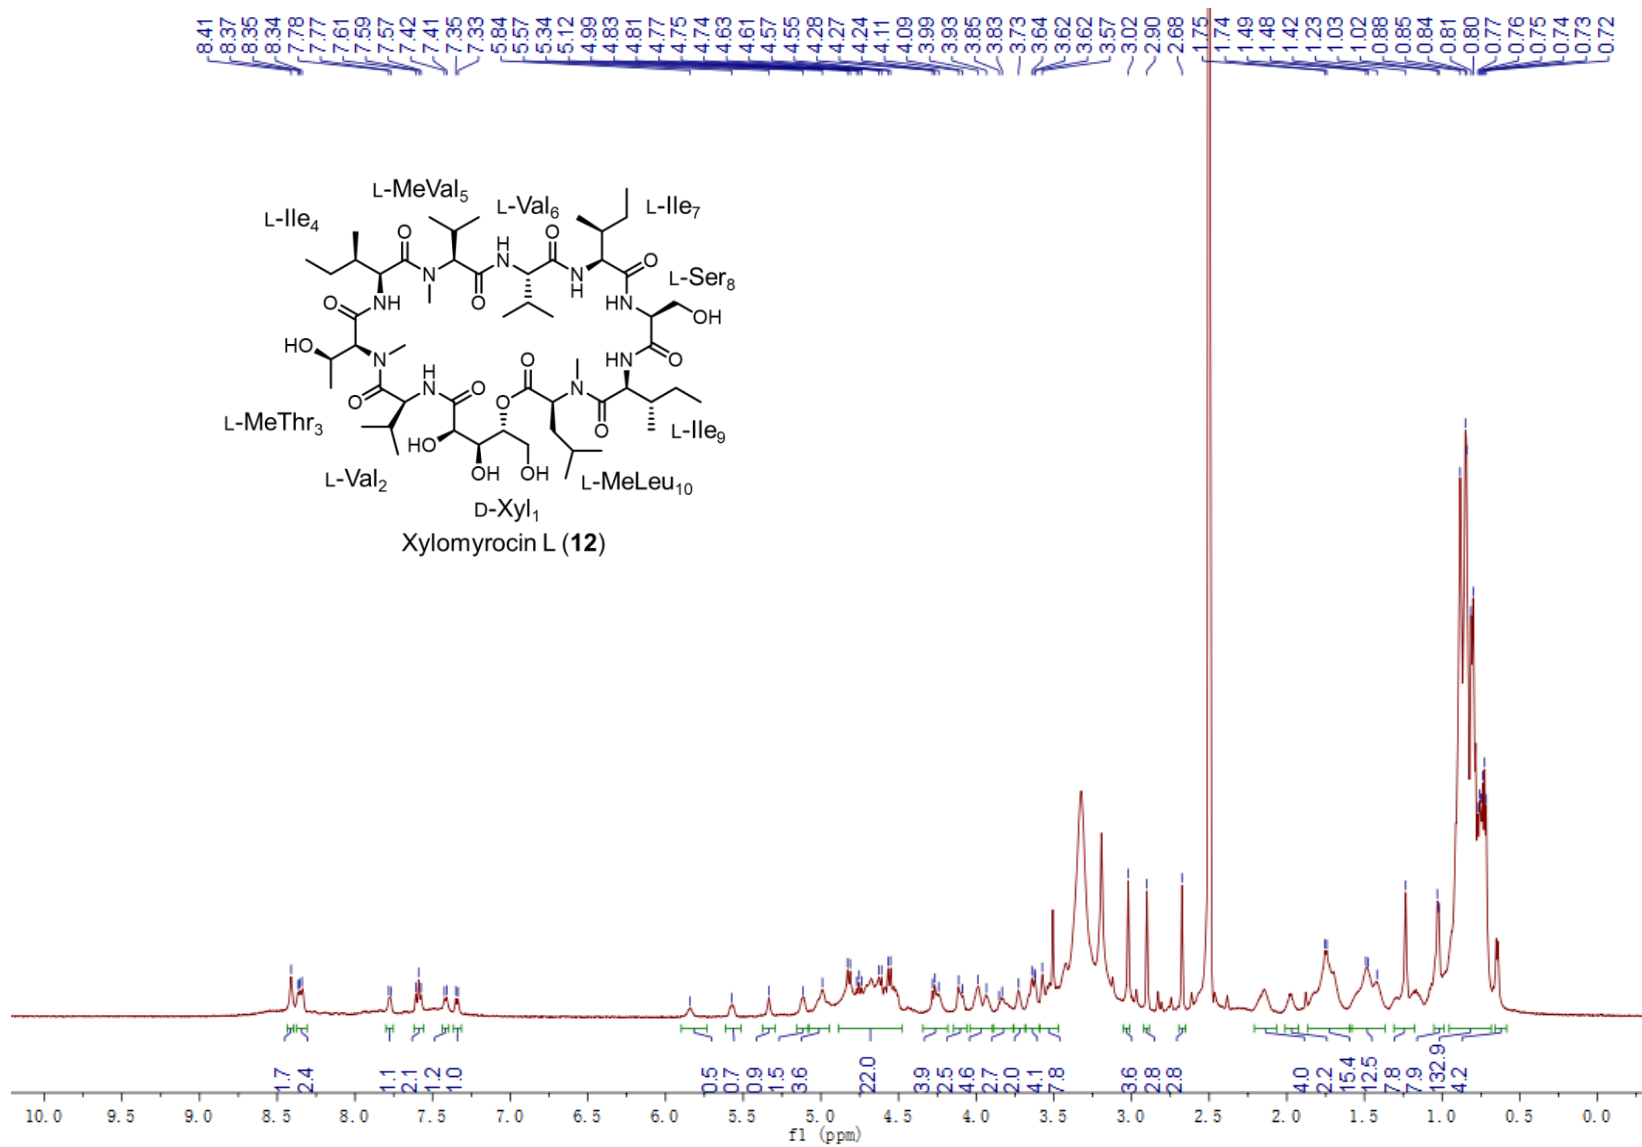

Figure S18.66. <sup>1</sup>H NMR spectrum of 12 in DMSO-*d*<sub>6</sub>

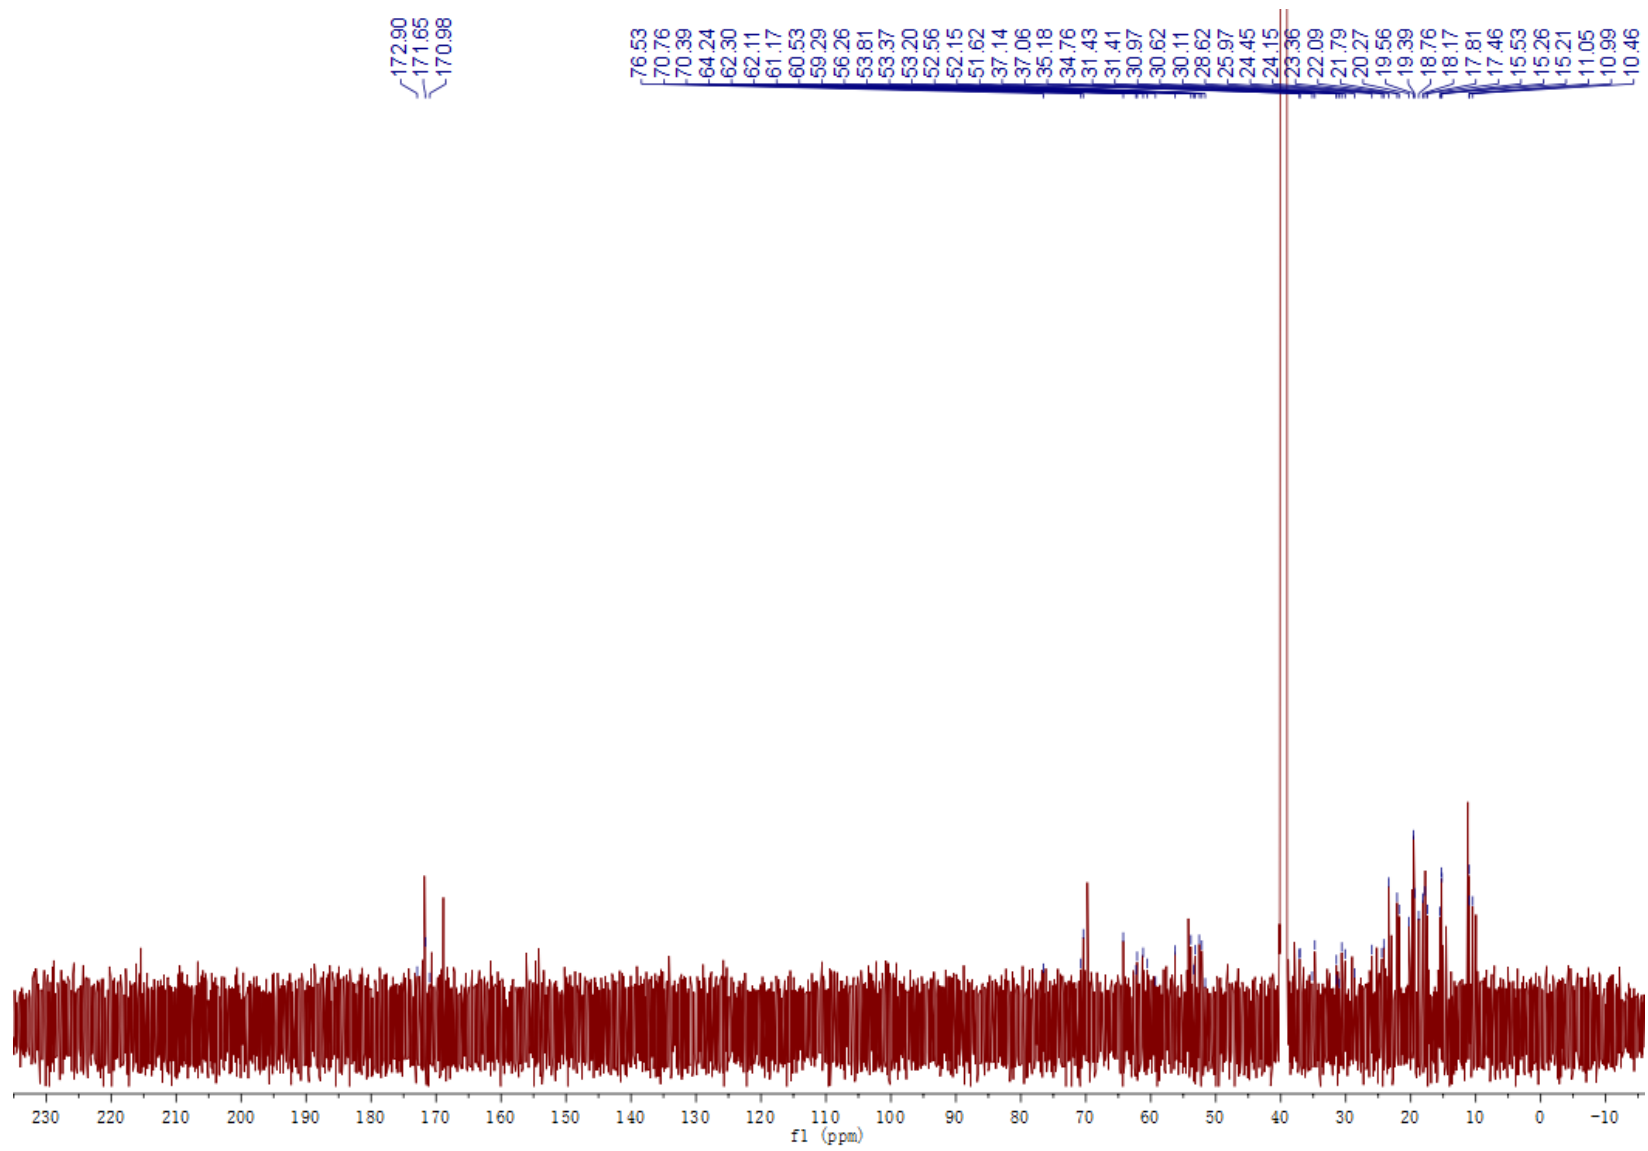

Figure S18.67.  $^{13}\text{C}$  NMR spectrum of 12 in  $\text{DMSO-}d_6$



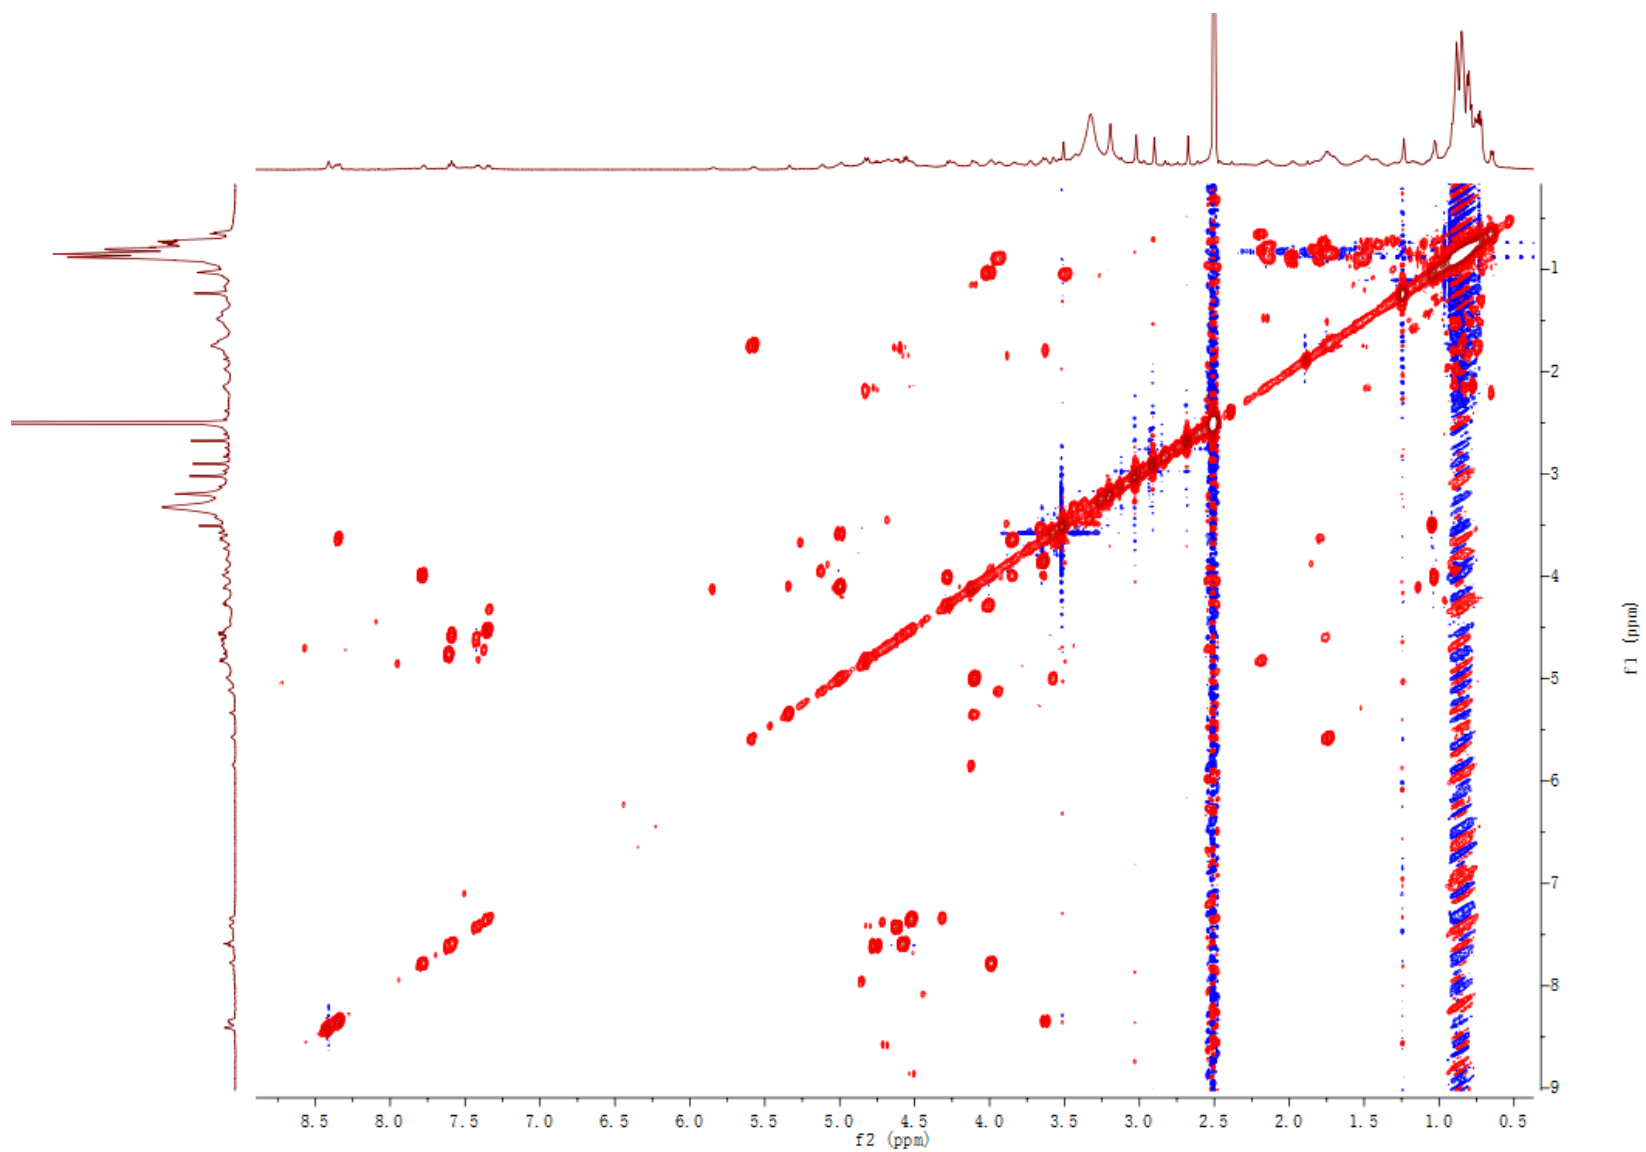

Figure S18.68.  $^1\text{H}$ - $^1\text{H}$  COSY spectrum of 12 in  $\text{DMSO-}d_6$

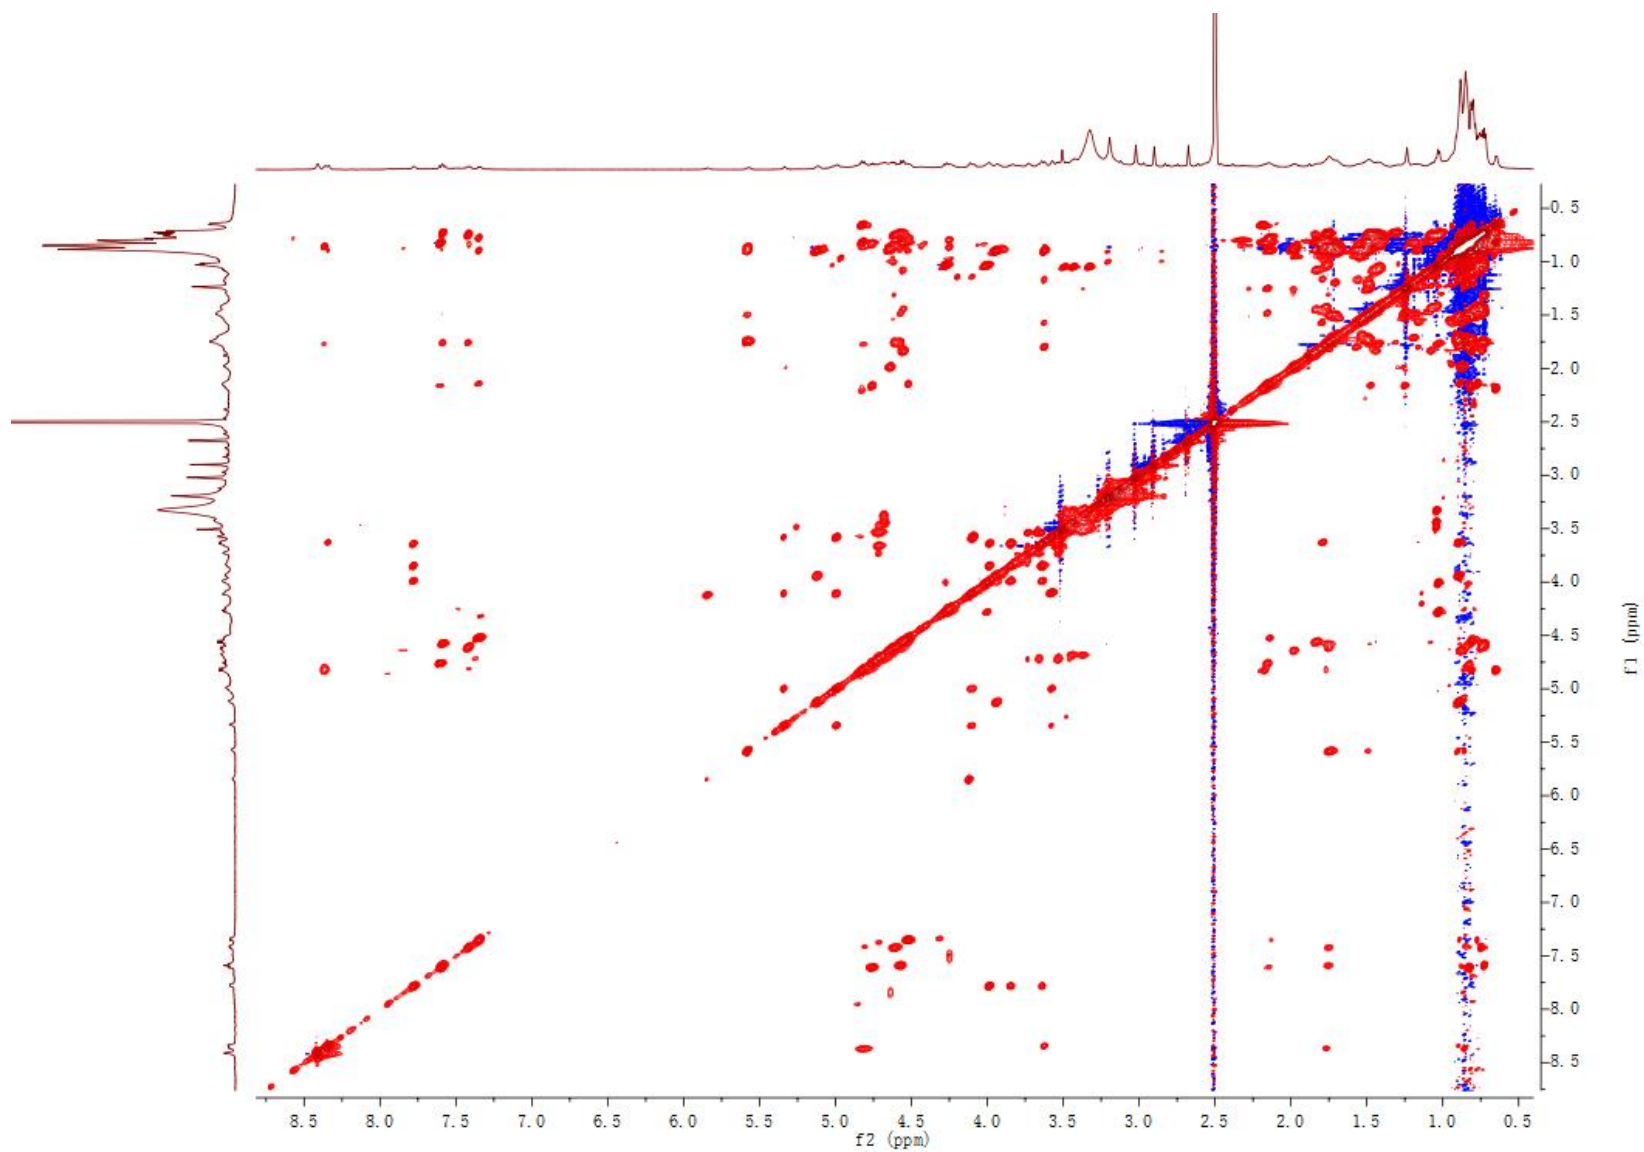

Figure S18.69.  $^1\text{H}$ - $^1\text{H}$  TOCSY spectrum of 12 in  $\text{DMSO-}d_6$

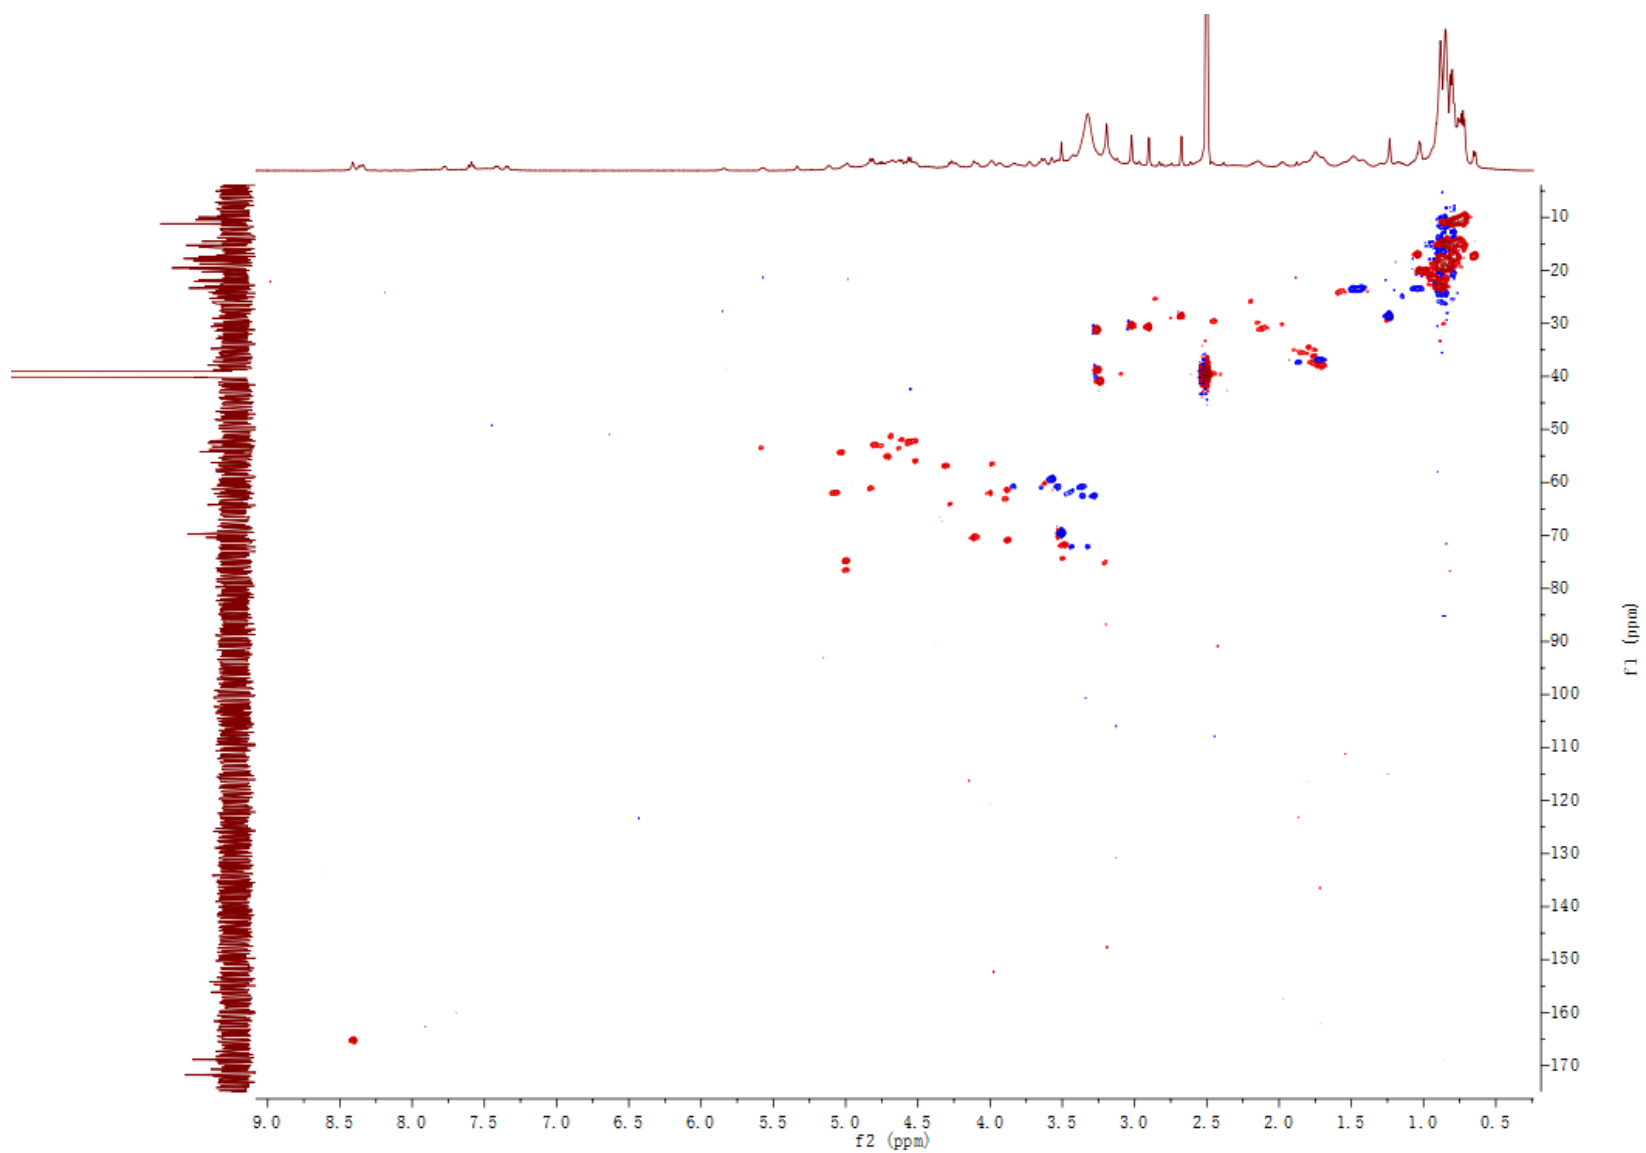

Figure S18.70. HSQC spectrum of 12 in DMSO-*d*<sub>6</sub>

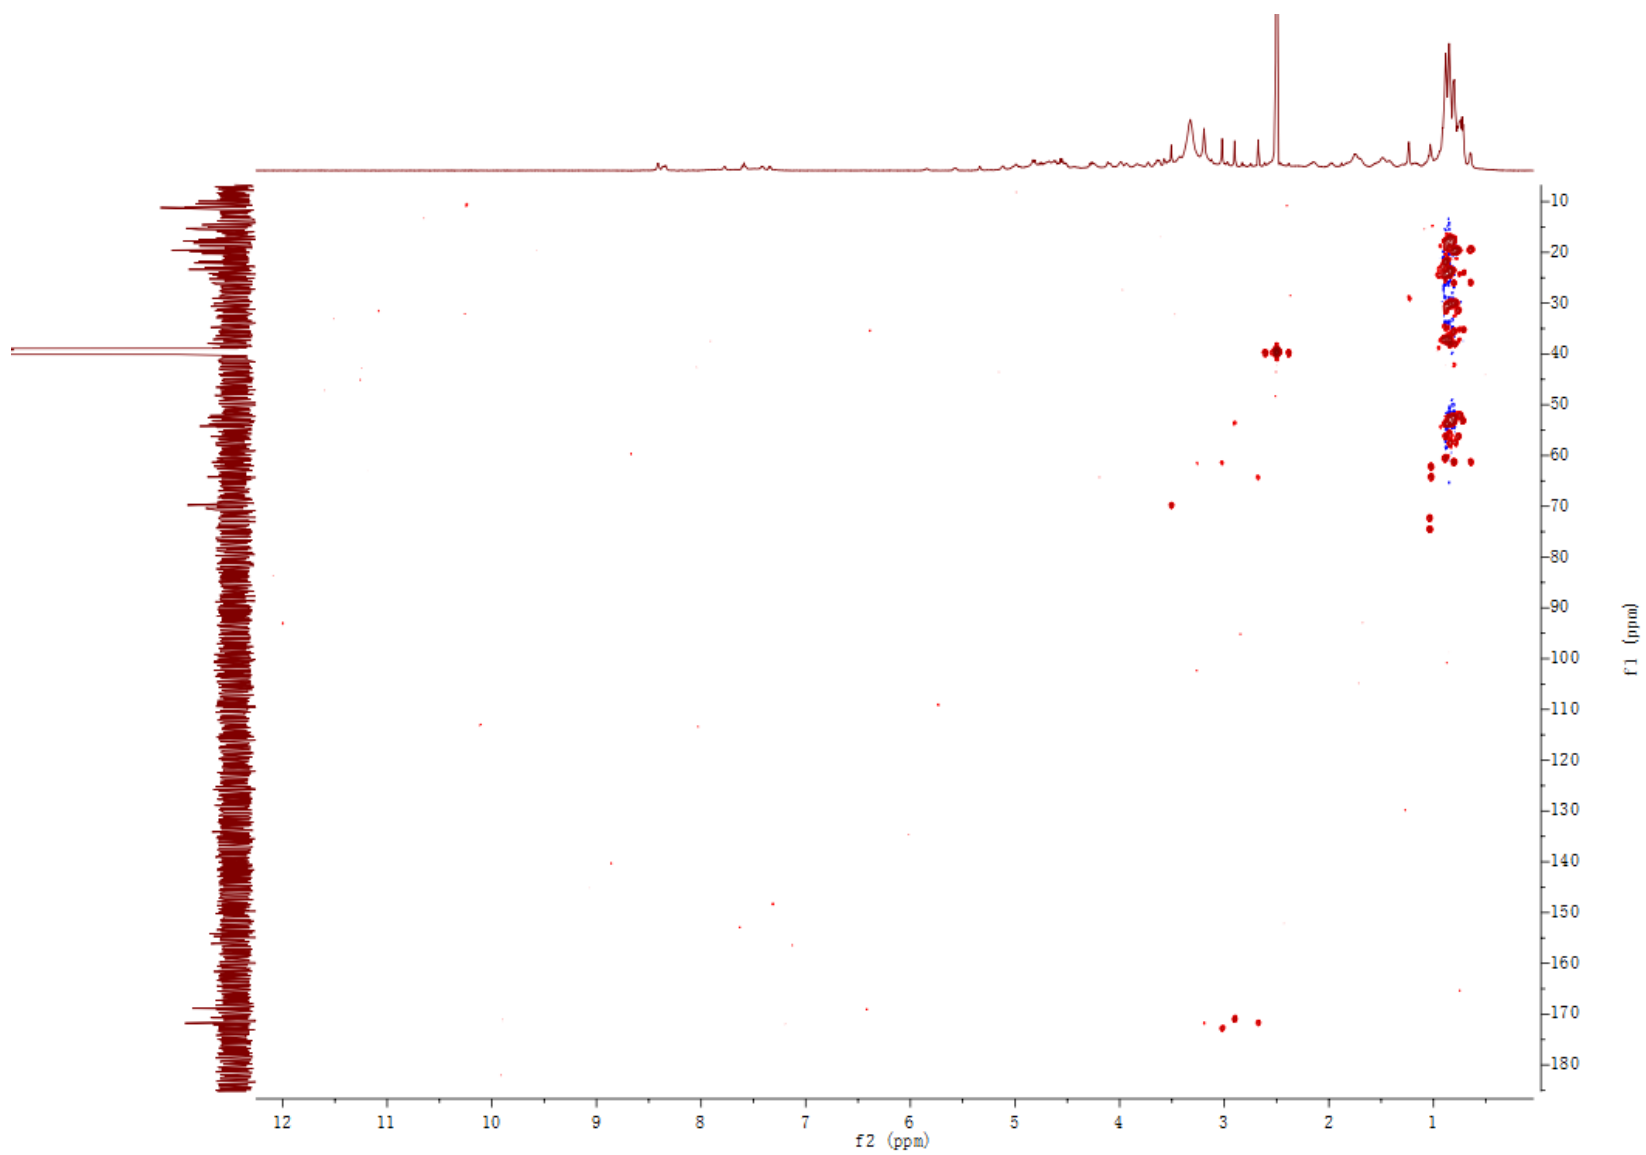

Figure S18.71. HMBC spectrum of 12 in DMSO-*d*<sub>6</sub>

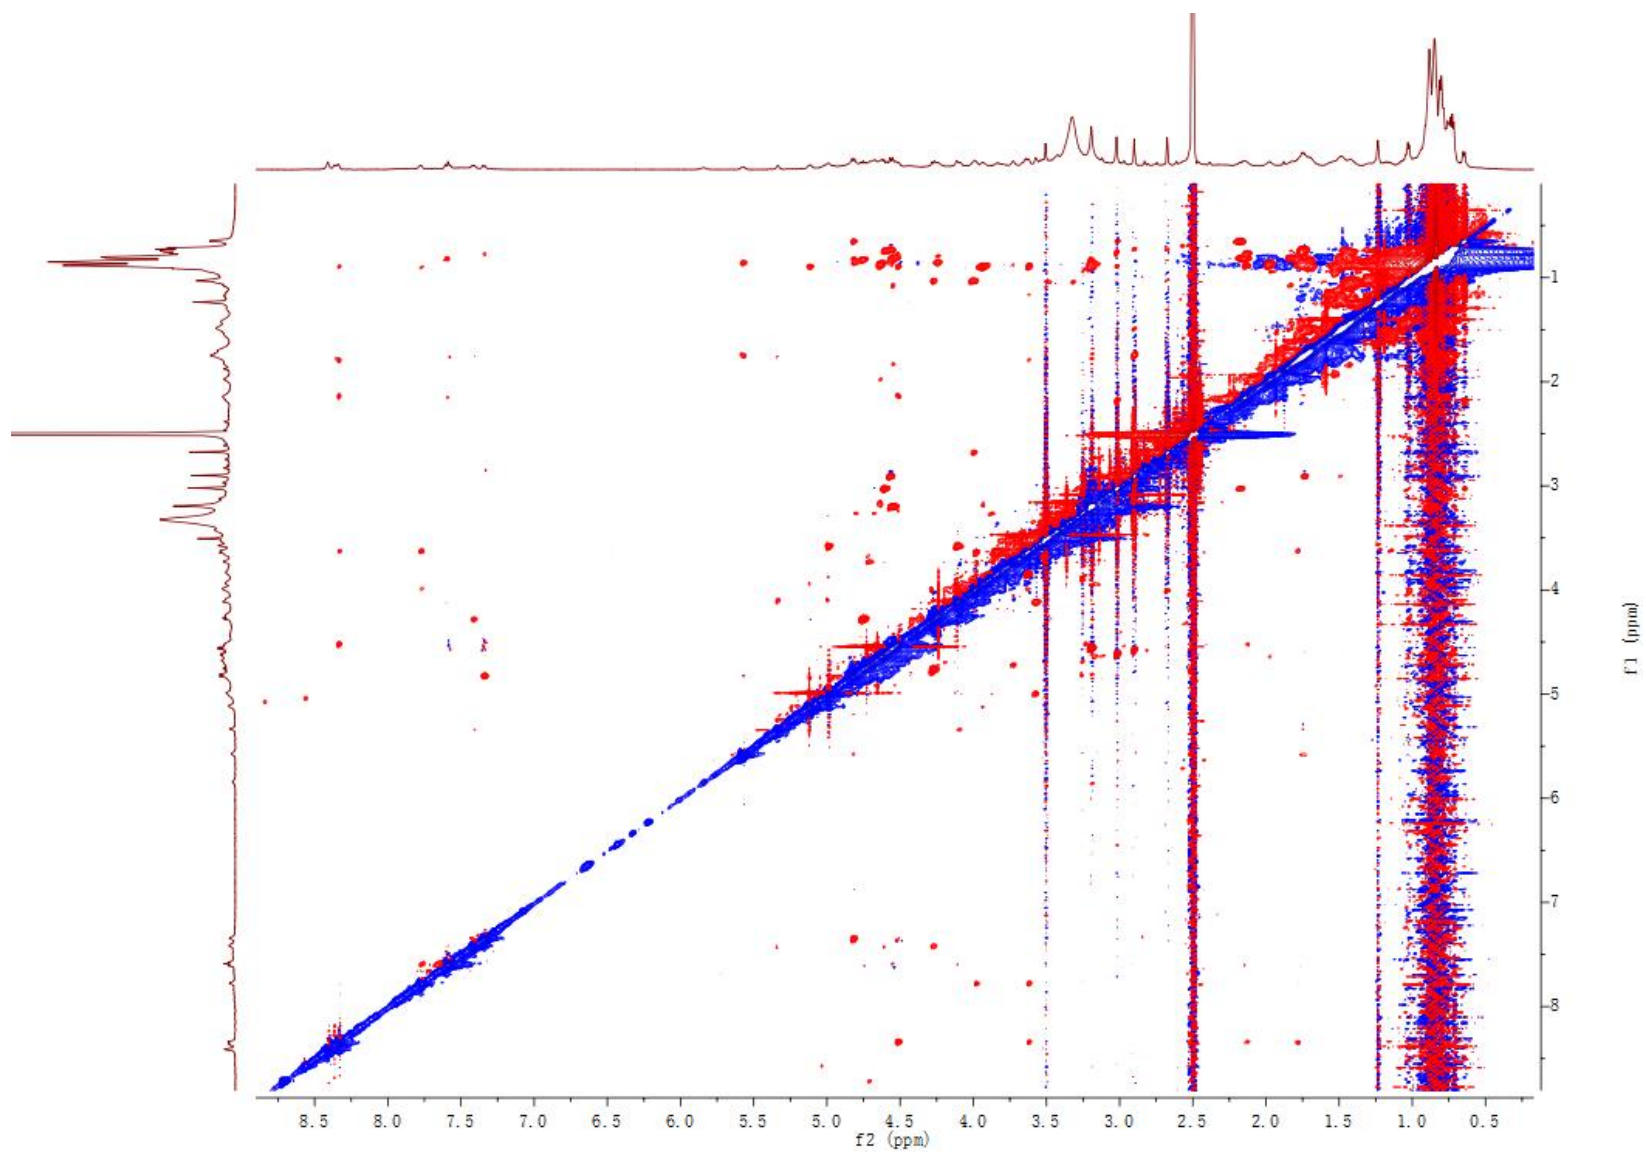

Figure S18.72. ROESY spectrum of 12 in DMSO- $d_6$

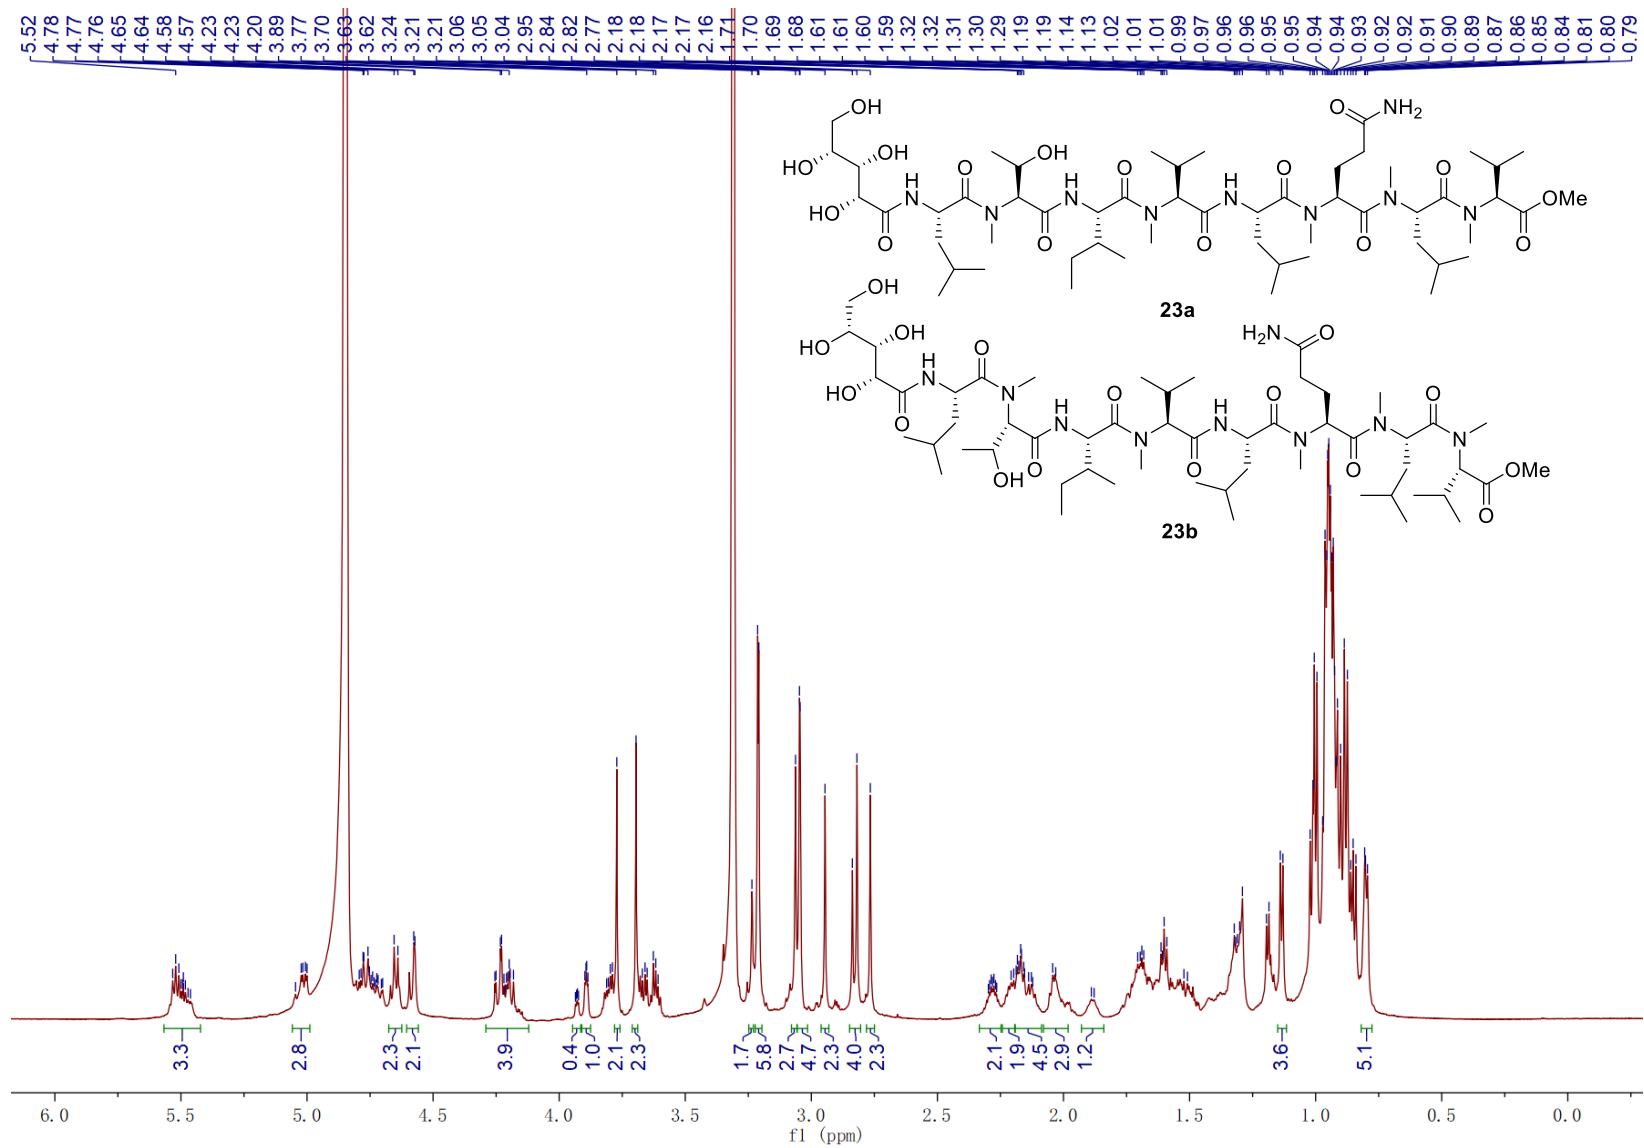

Figure S18.73.  $^1\text{H}$  NMR spectrum of 23 in methanol- $d_4$

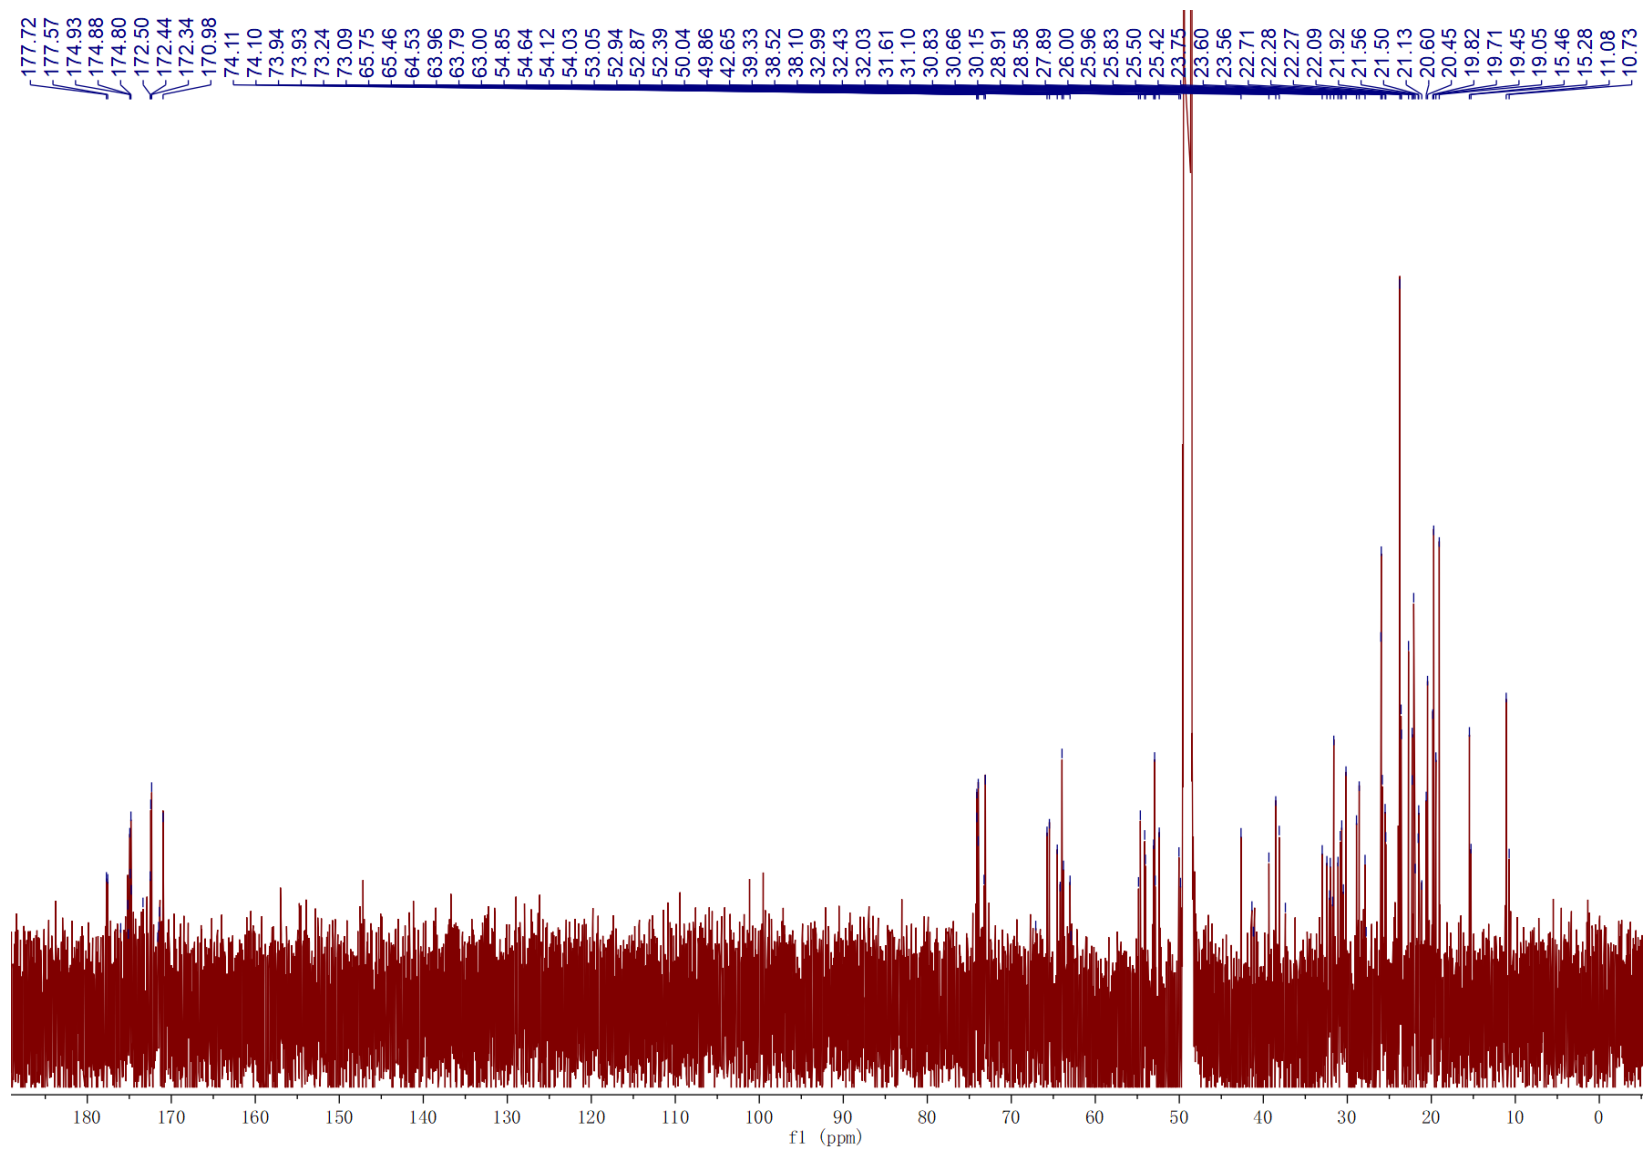

Figure S18.74.  $^{13}\text{C}$  NMR spectrum of 23 in methanol- $d_4$

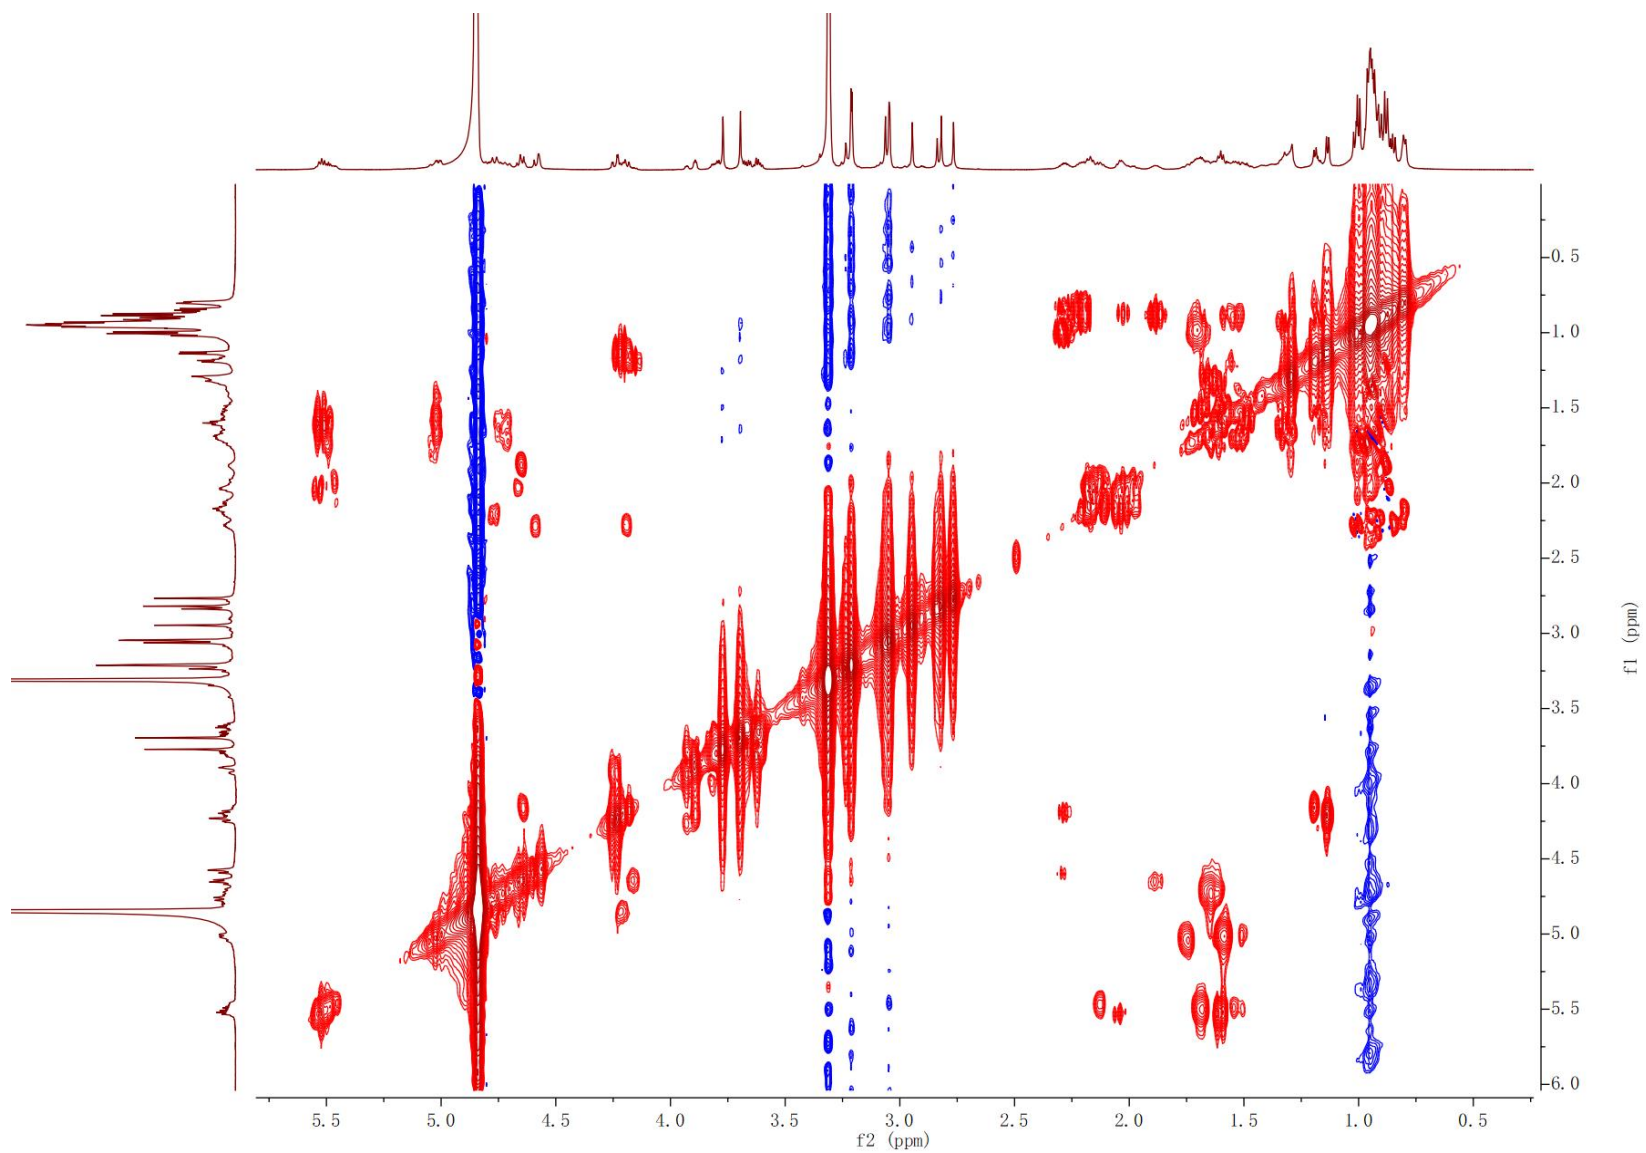

Figure S18.75.  $^1\text{H}$ - $^1\text{H}$  COSY spectrum of 23 in methanol- $d_4$



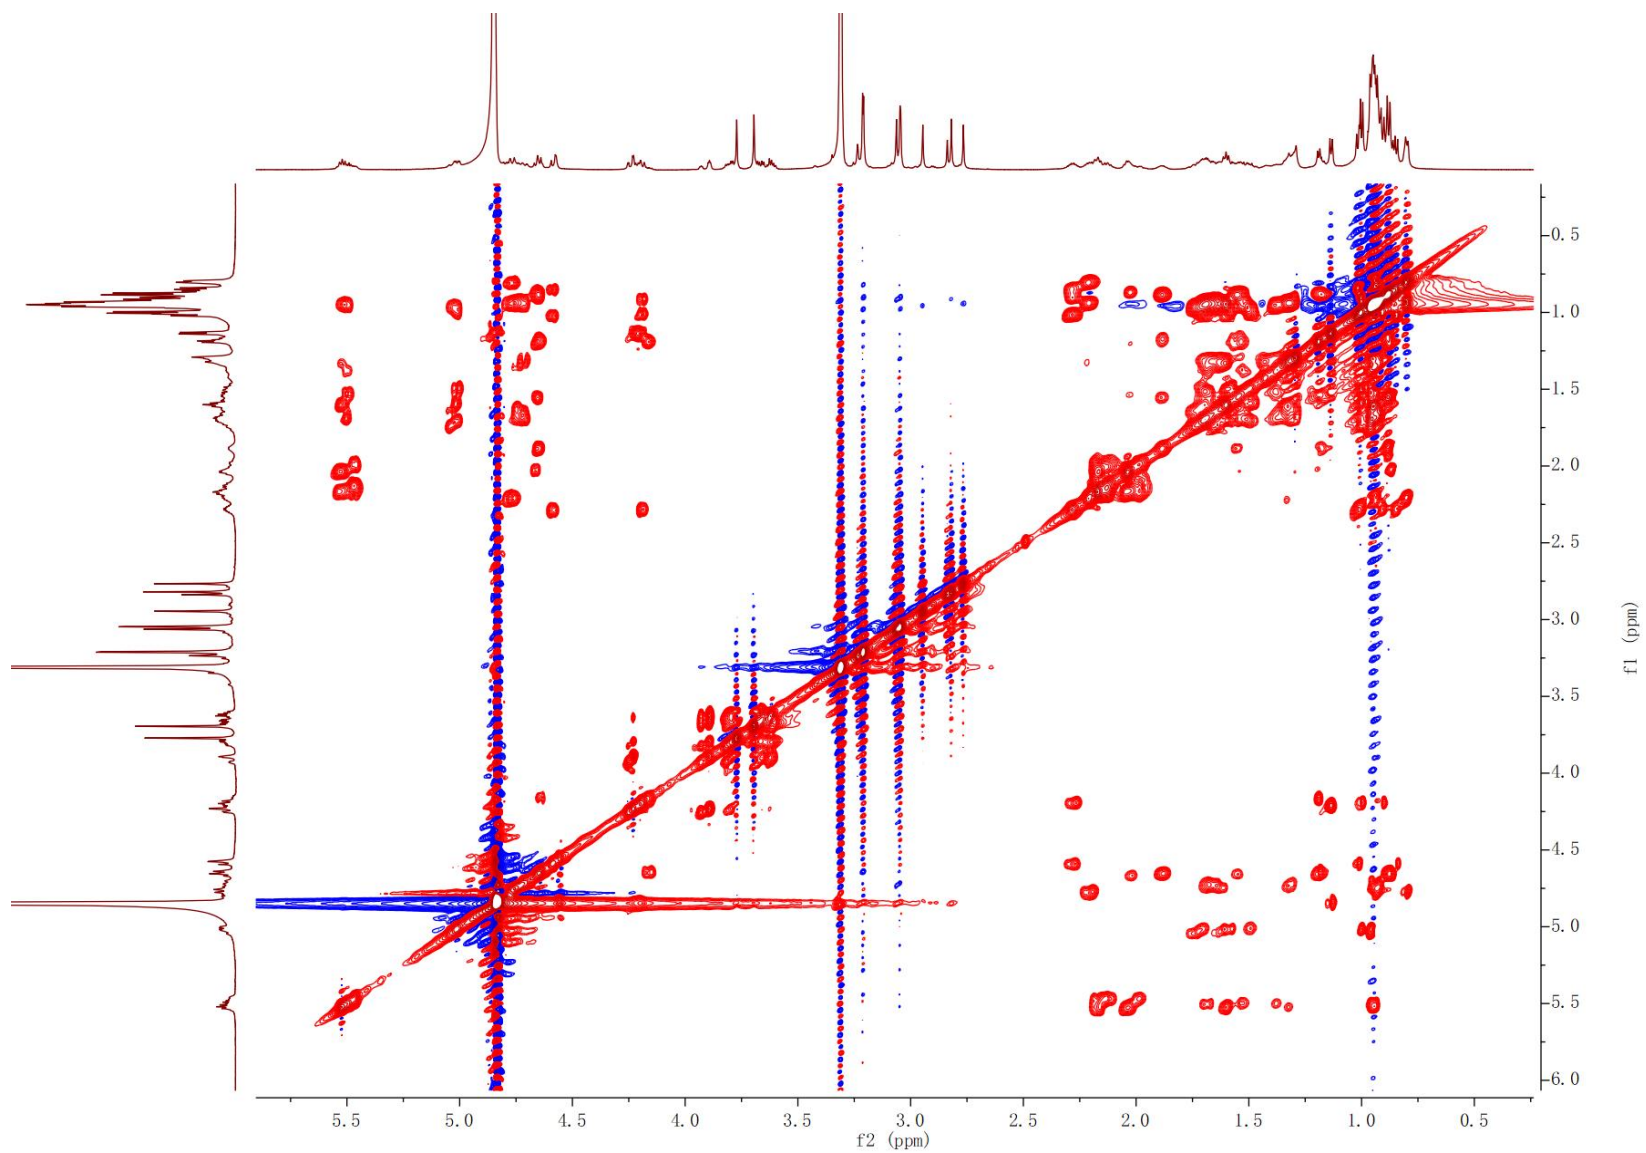

Figure S18.76.  $^1\text{H}$ - $^1\text{H}$  TOCSY spectrum of 23 in methanol- $d_4$

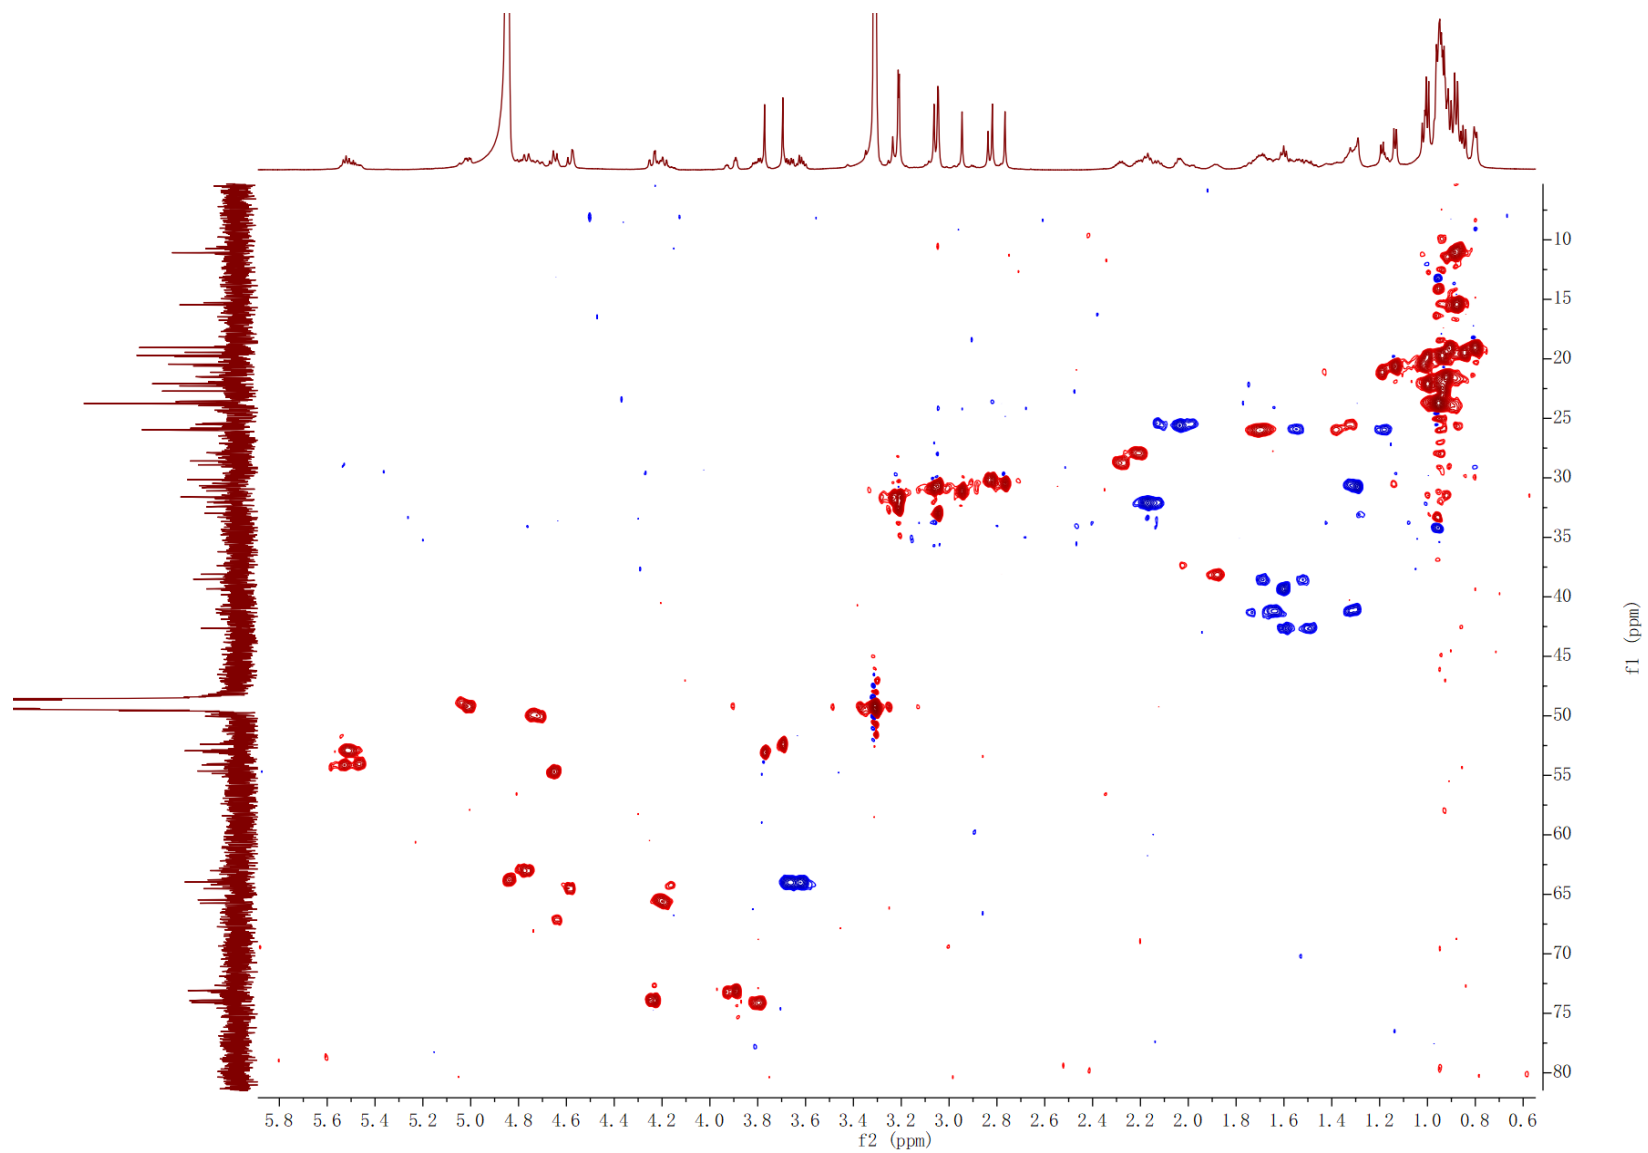

Figure S18.77. HSQC spectrum of 23 in methanol- $d_4$

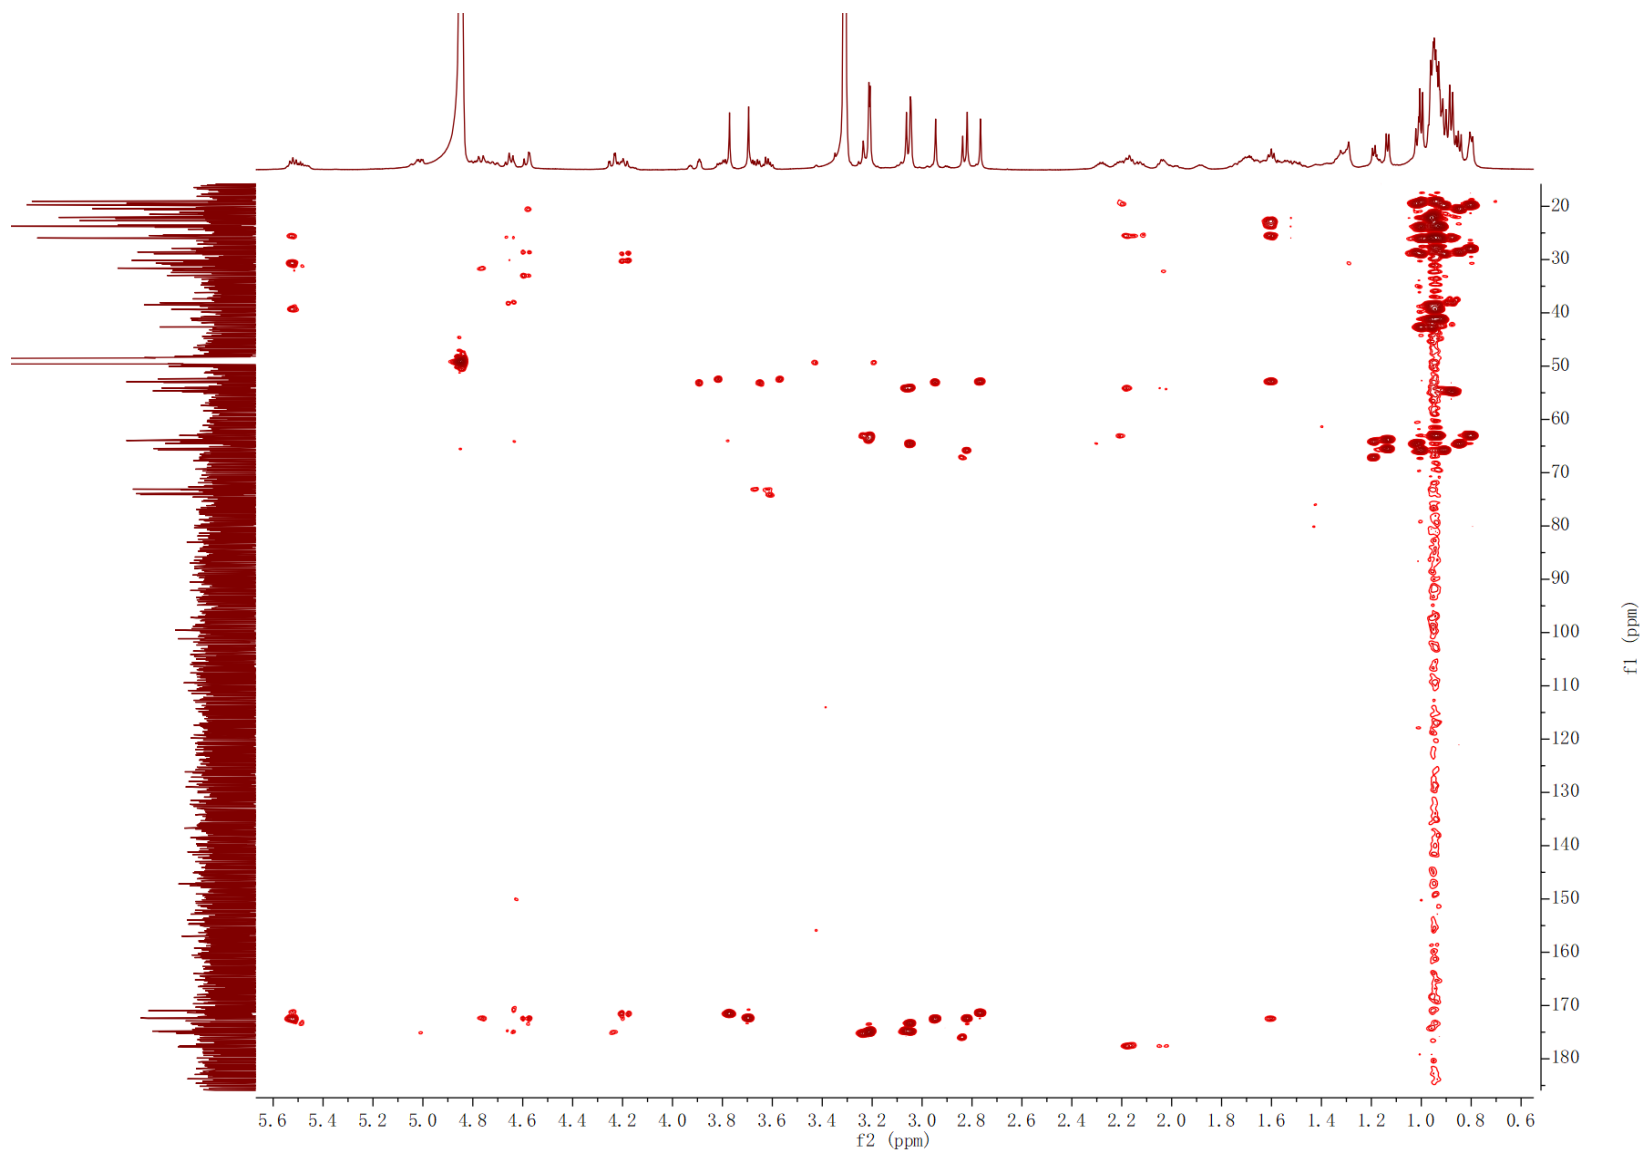

Figure S18.78. HMBC spectrum of 23 in methanol- $d_4$

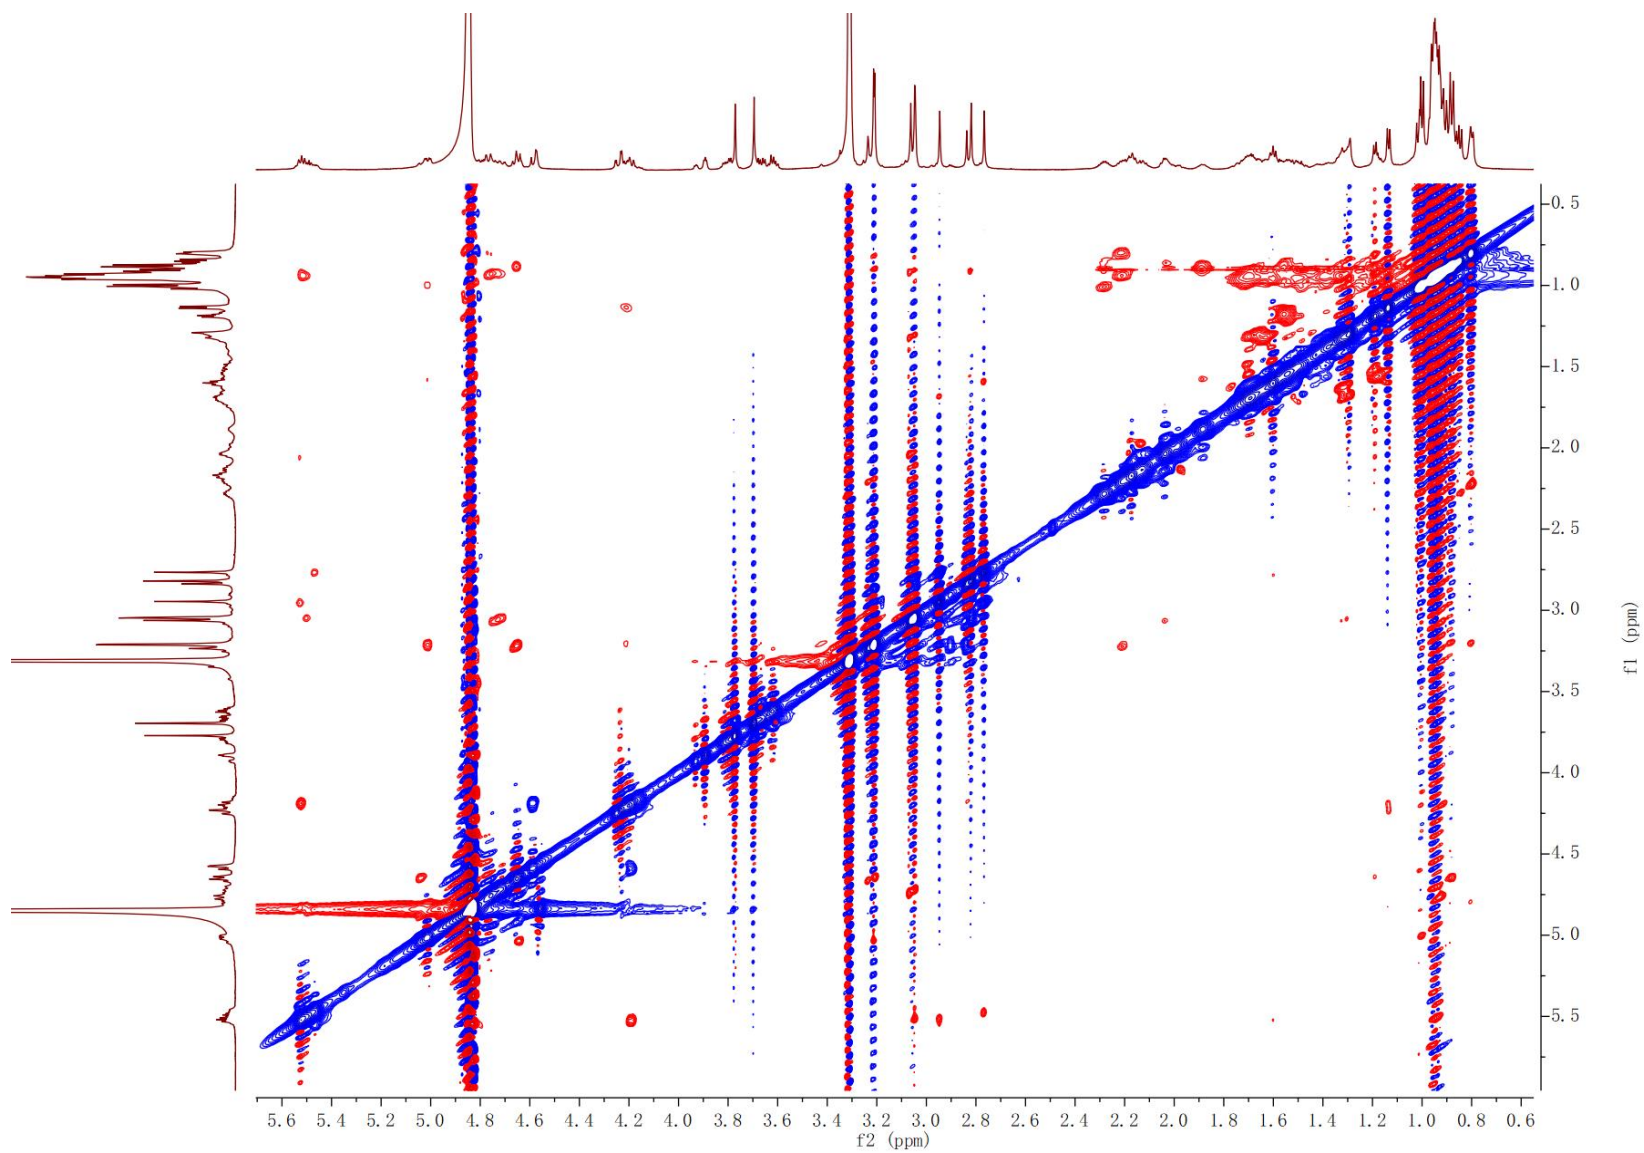

Figure S18.79. ROESY spectrum of 23 in methanol- $d_4$

#### 4. SI References

1. Wang, M., et al. Sharing and community curation of mass spectrometry data with global natural products social molecular networking. *Nat. Biotechnol.* **34**, 828–837 (2016).
2. Aron, A. T., et al. Reproducible molecular networking of untargeted mass spectrometry data using GNPS. *Nat. Protoc.* **15**, 1954–1991 (2020).
3. Shannon, P., et al. Cytoscape: a software environment for integrated models of biomolecular interaction networks. *Genome Res.* **13**, 2498–2504 (2003).
4. Jansson, P.-E., Kenne, L. & Schweda, E. Nuclear magnetic resonance and conformational studies on monoacetylated methyl D-glucopyranosides and D-galactopyranosides. *J. Chem. Soc., Perkin Trans. 1* 377–383 (1987).
5. McEwan, T., McInnes, A. G. & Smith, D. G. <sup>1</sup>H- and <sup>13</sup>C-N.M.R. spectra of the methyl mono-, di-, and tri-O-acetyl- $\alpha$ - and - $\beta$ -D-xylopyranosides. *Carbohydr. Res.* **104**, 161–168 (1982).
6. Harada, K.-i., et al. A method using LC/MS for determination of absolute configuration of constituent amino acids in peptide--- advanced Marfey's method--- *Tetrahedron Lett.* **36**, 1515–1518 (1995).
7. Sýkora, D., Žáková, L. & Buděšínský, M. High-performance liquid chromatography and nuclear magnetic resonance study of linear tetrapeptides and octapeptides containing N-methylated amino acid residues. *J. Chromatogr. A* **1160**, 128–136 (2007).
8. Chatterjee, J., Mierke, D. F. & Kessler, H. Conformational preference and potential templates of N-methylated cyclic pentaalanine peptides. *Chem. Eur. J.* **14**, 1508–1517 (2008).
9. Fischer, G. Chemical aspects of peptide bond isomerisation. *Chem. Soc. Rev.* **29**, 119–127 (2000).
10. Dolomanov, O. V., Bourhis, L. J., Gildea, R. J., Howard, J. A. K. & Puschmann, H. OLEX2: a complete structure solution, refinement and analysis program. *J. Appl. Crystallogr.* **42**, 339–341 (2009).
11. Sheldrick, G. M. SHELXT - integrated space-group and crystal-structure determination. *Acta Crystallogr. A Found. Adv.* **A71**, 3–8 (2015).
12. Koren, S., et al. Canu: scalable and accurate long-read assembly via adaptive k-mer weighting and repeat separation. *Genome Res.* **27**, 722–736 (2017).
13. DePristo, M. A., et al. A framework for variation discovery and genotyping using next-generation DNA sequencing data. *Nat. Genet.* **43**, 491–498 (2011).

14. McKenna, A., et al. The genome analysis toolkit: a mapreduce framework for analyzing next-generation DNA sequencing data. *Genome Res.* **20**, 1297–1303 (2010).
15. Boetzer, M., Henkel, C. V., Jansen, H. J., Butler, D. & Pirovano, W. Scaffolding pre-assembled contigs using SSPACE. *Bioinformatics* **27**, 578–579 (2011).
16. English, A. C., et al. Mind the gap: upgrading genomes with Pacific Biosciences RS long-read sequencing technology. *Plos One* **7**, e47768 (2012).
17. Tilburn, J., et al. Transformation by integration in *Aspergillus nidulans*. *Gene* **26**, 205–221 (1983).
18. Smilkstein, M., Sriwilaijaroen, N., Kelly, J. X., Wilairat, P. & Riscoe, M. Simple and inexpensive fluorescence-based technique for high-throughput antimalarial drug screening. *Antimicrob. Agents Chemother.* **48**, 1803–1806 (2004).
19. Onishi, H. R., et al. Antibacterial agents that inhibit lipid A biosynthesis. *Science* **274**, 980–982 (1996).
20. Li, Y., et al. Anti-*Cryptococcus* epipolythiodioxopiperazines from *Podospora australis*. *J. Nat. Prod.* **79**, 2357–2363 (2016).
21. Blin, K., et al. antiSMASH 5.0: updates to the secondary metabolite genome mining pipeline. *Nucleic Acids Res.* **47**, W81–W87 (2019).
22. Stachelhaus, T., Mootz, H. D. & Marahiel, M. A. The specificity-conferring code of adenylation domains in nonribosomal peptide synthetases. *Chem. Biol.* **6**, 493–505 (1999).
23. Röttig, M., et al. NRPSpredictor2—a web server for predicting NRPS adenylation domain specificity. *Nucleic Acids Res.* **39**, W362–W367 (2011).
